# Supplementary material for: BACE2 distribution in major brain cell types and identification of novel substrates
Source: Life Sci Alliance. 2018 Feb 15;1(1):e201800026. doi: 10.26508/lsa.201800026 (PMC6238391; doi:10.26508/lsa.201800026)
Supplement: Supplementary file 1 [file LSA-2018-00026_TableS1.xlsx]

## Sheet: BDKO_vs_B1KO_CSF
Uniprot Accession							No. of quantifications in each group		log2 transformed Label Free Quantification (LFQ) intensities of individual samples											Overall identified peptides			AA sequence coverage								Identified unique peptides in individual samples											Uniprot subcellular locations
Protein IDs	Majority protein IDs	Protein names	Gene names	Mean Ratio (BDKO/B1KO)	Mean Log2 (BDKO/B1KO)	p-value	Quants B1KO	Quants DKO	log2 LFQ B1KO_1	log2 LFQ B1KO_2	log2 LFQ B1KO_3	log2 LFQ B1KO_4	log2 LFQ B1KO_5	log2 LFQ B1KO_6	log2 LFQ BDKO_1	log2 LFQ BDKO_2	log2 LFQ BDKO_3	log2 LFQ BDKO_4	log2 LFQ BDKO_5	Peptides	Razor + unique peptides	Unique peptides	Sequence coverage [%]	Unique + razor sequence coverage [%]	Unique sequence coverage [%]	Mol. weight [kDa]	Q-value	Score	Intensity	MS/MS count	Unique peptides B1KO_1	Unique peptides B1KO_2	Unique peptides B1KO_3	Unique peptides B1KO_4	Unique peptides B1KO_5	Unique peptides B1KO_6	Unique peptides BDKO_1	Unique peptides BDKO_2	Unique peptides BDKO_3	Unique peptides BDKO_4	Unique peptides BDKO_5	Cytoplasm	Nucleus	Membrane	Mitochondrion	ECM	Secreted	Unknown	GPI
Q62000	Q62000	Mimecan	Ogn	0.523479	-0.933798	1.46572e-05	6	5	27.8664	27.6508	27.8065	27.8249	27.8203	27.8596	27.2362	26.5891	26.9979	26.6668	26.8648	20	20	20	49.7	49.7	49.7	34.012	0	95.836	3334100000	98	9	14	14	11	10	10	8	18	15	11	9	0	0	0	0	1	1	0	0
P21180	P21180	Complement C2;Complement C2b fragment;Complement C2a fragment	C2	0.599539	-0.738075	4.52465e-05	6	5	25.5591	25.8331	25.6218	25.9863	25.7227	25.8653	25.1358	25.0953	25.0208	24.7279	25.1534	19	19	19	26.8	26.8	26.8	84.741	0	106.06	880810000	62	7	16	17	11	13	9	9	14	16	13	11	0	0	0	0	0	1	0	0
O88188	O88188	Lymphocyte antigen 86	Ly86	0.514221	-0.959541	0.000202215	6	4	25.5166	25.2498	25.3959	25.676	25.6087	25.4028	24.4605	NaN	24.1015	24.8521	24.6476	3	3	3	20.4	20.4	20.4	17.811	0	13.622	574930000	19	3	3	3	3	3	2	2	1	3	3	3	0	0	0	0	0	1	0	0
P12961	P12961	Neuroendocrine protein 7B2;N-terminal peptide;C-terminal peptide	Scg5	0.337028	-1.56906	0.000271723	6	5	29.9369	29.6151	29.8425	30.2775	29.5629	30.5419	28.7768	27.5351	28.7128	28.6853	28.2587	13	13	13	54.2	54.2	54.2	23.866	0	323.31	12674000000	122	9	13	13	12	10	10	8	10	12	11	11	0	0	0	0	0	1	0	0
P97290;CON__P50448	P97290	Plasma protease C1 inhibitor	Serping1	0.739141	-0.436078	0.000532875	6	5	29.3157	29.4547	29.5636	29.7966	29.4055	29.5113	29.1766	29.0366	28.9931	28.9908	29.1619	17	17	17	39.9	39.9	39.9	55.584	0	323.31	12811000000	128	10	12	13	12	11	10	11	15	16	15	14	0	0	0	0	0	1	0	0
P20060	P20060	Beta-hexosaminidase subunit beta	Hexb	0.622165	-0.684631	0.00144364	6	5	29.6427	29.6197	29.3954	29.7276	29.6198	29.66	29.0882	28.3148	28.9615	29.2109	29.0557	28	28	28	36.6	36.6	36.6	61.115	0	202.51	12220000000	231	23	24	23	22	26	23	20	21	26	26	23	0	0	0	0	0	0	1	0
O09159	O09159	Lysosomal alpha-mannosidase	Man2b1	0.551792	-0.857803	0.00150394	6	5	25.2763	25.0656	25.6944	25.856	25.8874	25.5052	24.5265	24.2461	24.9679	24.8522	24.8556	18	18	18	22.8	22.8	22.8	114.65	0	98.87	734250000	79	10	18	16	14	13	11	10	11	14	13	12	0	0	0	0	0	0	1	0
Q61809	Q61809	Leucine-rich repeat neuronal protein 1	Lrrn1	0.494886	-1.01483	0.00188297	6	3	22.2611	22.6839	22.6845	22.586	22.573	23.1438	NaN	NaN	21.2742	21.8855	21.7619	5	5	5	8.2	8.2	8.2	80.547	0	8.7951	83398000	13	2	5	5	4	5	2	1	1	3	3	2	0	0	1	0	0	0	0	0
Q91WP6;Q5I2A0;Q6P4P1	Q91WP6	Serine protease inhibitor A3N	Serpina3n	1.77925	0.831265	0.00197719	6	5	27.3516	27.8658	27.565	27.7062	27.6034	27.6632	28.3064	28.9127	27.9458	28.9191	28.2017	24	21	19	51.9	45.5	39.7	46.717	0	323.31	5919900000	120	10	14	14	15	13	8	10	18	16	14	14	0	0	0	0	0	1	0	0
Q62356	Q62356	Follistatin-related protein 1	Fstl1	0.545865	-0.873384	0.00200043	6	5	26.3447	26.936	26.7587	26.7364	26.6226	26.8131	26.0646	25.0404	25.8793	26.0365	26.1218	11	11	11	42.2	42.2	42.2	34.554	0	52.111	1531200000	89	10	8	10	9	8	5	8	8	9	9	9	0	0	0	0	0	1	0	0
P10493	P10493	Nidogen-1	Nid1	0.646527	-0.629217	0.00210496	6	5	24.6753	24.608	24.8406	24.5889	24.8674	24.4826	24.3327	23.5011	24.2199	24.0301	24.1558	15	15	15	14.6	14.6	14.6	136.54	0	36.2	402850000	65	12	15	14	12	11	10	11	10	15	14	13	0	0	0	0	1	1	0	0
O54901	O54901	OX-2 membrane glycoprotein	Cd200	0.488576	-1.03335	0.0022999	5	3	22.095	21.9114	22.059	21.9963	NaN	22.7606	21.0948	NaN	NaN	21.1857	21.1129	3	3	3	12.6	12.6	12.6	31.256	0	4.6497	50344000	5	3	3	3	2	1	2	2	0	1	3	3	0	0	1	0	0	0	0	0
P27090	P27090	Transforming growth factor beta-2;Latency-associated peptide	Tgfb2	0.582132	-0.780583	0.00269583	5	4	22.6313	22.1862	22.1875	NaN	22.4242	22.315	NaN	21.1865	21.543	21.5557	21.9878	2	2	2	6.3	6.3	6.3	47.588	0	7.1764	67538000	11	2	2	2	1	2	2	0	2	2	2	2	0	0	0	0	0	1	0	0
P82198	P82198	Transforming growth factor-beta-induced protein ig-h3	Tgfbi	0.684861	-0.546116	0.00296927	6	5	25.3953	25.4049	25.4623	25.5223	25.4309	25.02	24.6505	24.4442	24.9658	25.0931	24.9789	15	15	15	22.7	22.7	22.7	74.596	0	45.021	703550000	75	9	13	15	13	12	10	7	11	10	12	11	0	0	0	0	1	1	0	0
P01864	P01864	Ig gamma-2A chain C region secreted form		6.54042	2.70938	0.0042416	4	5	23.4881	NaN	22.153	24.9747	24.4935	NaN	25.7835	27.47	26.6085	25.8542	26.7172	7	7	6	18.5	18.5	13.7	36.595	0	100.76	1523600000	34	3	0	2	3	3	0	3	6	5	4	5	0	0	0	0	0	1	0	0
P50608	P50608	Fibromodulin	Fmod	0.640646	-0.6424	0.00447433	6	5	26.1841	26.0523	26.1156	26.0036	26.0161	25.5066	25.8291	24.9304	25.3916	25.3158	25.2197	7	7	7	23.7	23.7	23.7	43.054	0	77.229	1008200000	39	5	5	6	5	5	4	5	7	6	4	5	0	0	0	0	1	1	0	0
P97927	P97927	Laminin subunit alpha-4	Lama4	0.693751	-0.527509	0.00458529	6	4	22.351	22.905	22.5793	22.3102	22.7745	22.5111	22.1141	NaN	21.9244	21.8978	22.241	6	6	6	4.2	4.2	4.2	201.82	0	9.1202	91319000	14	3	6	5	3	4	3	3	1	5	5	2	0	0	0	0	1	1	0	0
Q9Z1T2;CON__ENSEMBL:ENSBTAP00000006074;Q9R0G6	Q9Z1T2	Thrombospondin-4	Thbs4	0.594107	-0.751205	0.00599044	6	5	23.5166	23.1354	23.2514	23.1788	23.4747	23.6879	23.0383	21.8357	22.6883	22.7441	22.8083	3	3	3	3.6	3.6	3.6	106.37	0	8.236	152500000	15	3	3	3	3	3	3	2	2	3	3	3	0	0	0	0	1	1	0	0
Q8K4G1	Q8K4G1	Latent-transforming growth factor beta-binding protein 4	Ltbp4	0.547214	-0.869823	0.00635316	6	5	23.6436	23.8225	23.8609	23.517	23.6964	23.6024	23.529	22.0246	23.1769	22.4626	22.9102	9	9	9	7.7	7.7	7.7	178.64	0	27.443	187780000	23	4	7	8	8	7	5	6	4	7	6	6	0	0	0	0	1	1	0	0
Q61112	Q61112	45 kDa calcium-binding protein	Sdf4	0.587274	-0.767894	0.0064117	6	5	25.8986	25.9762	25.2979	25.3109	25.4148	25.4519	25.1441	24.0876	24.7613	25.0755	24.8839	10	10	10	35.7	35.7	35.7	42.064	0	58.355	723350000	52	6	9	8	9	6	7	5	5	9	10	9	0	0	0	0	0	0	1	0
Q8VDN2;Q6PIC6;Q6PIE5;Q9WV27;Q64436	Q8VDN2;Q6PIC6;Q6PIE5	Sodium/potassium-transporting ATPase subunit alpha-1;Sodium/potassium-transporting ATPase subunit alpha-3;Sodium/potassium-transporting ATPase subunit alpha-2	Atp1a1;Atp1a3;Atp1a2	0.515251	-0.956653	0.00664934	6	5	22.7722	23.6206	22.2547	23.0402	23.1809	22.8333	22.6089	21.641	21.843	22.2945	21.5809	8	8	8	10.9	10.9	10.9	112.98	0	40.206	113410000	24	2	6	5	8	7	5	5	4	4	5	2	0	0	1	0	0	0	0	0
Q03734	Q03734	Serine protease inhibitor A3M	Serpina3m	4.68608	2.22838	0.00727144	3	5	NaN	23.2014	23.7927	22.7257	NaN	NaN	25.1232	26.8782	24.6608	25.623	25.0563	22	12	11	56.7	34.7	32.1	47.064	0	52.42	777160000	33	0	6	6	5	0	0	6	11	9	6	7	0	0	0	0	0	1	0	0
P09535	P09535	Insulin-like growth factor II;Insulin-like growth factor II;Preptin	Igf2	0.690952	-0.533343	0.0080096	6	5	26.1967	26.6524	26.7774	26.7447	26.5353	26.6907	26.2188	25.891	26.3776	25.6177	26.2258	5	5	5	41.1	41.1	41.1	20.03	0	245.25	1700900000	48	3	4	5	5	4	2	3	5	4	4	4	0	0	0	0	0	1	0	0
P05201	P05201	Aspartate aminotransferase, cytoplasmic	Got1	1.29656	0.374693	0.00804142	5	3	21.5617	21.5211	21.3033	21.6969	21.6638	NaN	NaN	NaN	21.9566	21.9637	21.8519	4	4	4	15	15	15	46.247	0	6.3544	50433000	12	2	4	3	2	3	1	1	1	2	4	3	1	0	0	0	0	0	0	0
Q6GU68	Q6GU68	Immunoglobulin superfamily containing leucine-rich repeat protein	Islr	0.619039	-0.691897	0.00982491	6	5	25.3342	25.1206	25.26	25.3339	25.2259	25.5012	25.0805	23.7541	24.6517	24.8627	24.6713	8	8	8	25.7	25.7	25.7	45.614	0	33.313	627420000	47	5	7	8	6	6	5	5	6	6	6	7	0	0	0	0	0	1	0	0
Q5MJS3;Q8CID3	Q5MJS3	Extracellular serine/threonine protein kinase FAM20C	Fam20c	0.771384	-0.374479	0.00996989	6	5	24.6779	24.8396	24.824	24.8294	24.593	24.578	24.1231	24.0785	24.6196	24.5793	24.3452	10	10	10	26.6	26.6	26.6	65.765	0	32.327	466130000	39	4	9	7	9	9	5	5	6	7	9	8	0	0	0	0	0	1	0	0
Q9DC11	Q9DC11	Plexin domain-containing protein 2	Plxdc2	0.566137	-0.820778	0.0109505	6	5	25.6527	26.3888	26.1557	25.5886	25.6174	25.6069	25.3115	24.1159	25.176	25.2553	25.2123	9	9	9	17.7	17.7	17.7	59.616	0	28.174	885790000	44	5	8	9	7	9	8	7	6	9	7	8	0	0	1	0	0	0	0	0
P70663	P70663	SPARC-like protein 1	Sparcl1	0.71595	-0.48207	0.011287	6	5	32.0109	32.2358	31.9435	32.2353	32.0226	31.9627	31.5969	30.9861	31.8157	31.767	31.7664	38	38	38	58.9	58.9	58.9	72.286	0	323.31	74961000000	460	31	31	34	29	30	27	32	35	35	34	34	0	0	0	0	1	1	0	0
P09470	P09470	Angiotensin-converting enzyme;Angiotensin-converting enzyme, soluble form	Ace	0.682208	-0.551716	0.0114136	6	5	25.7138	26.1469	25.8751	25.7242	25.9207	26.1851	25.6934	24.7825	25.271	25.6108	25.5219	17	17	17	14	14	14	150.92	0	93.508	986640000	94	13	15	16	13	14	12	11	11	14	16	14	1	0	1	0	0	1	0	0
O88593	O88593	Peptidoglycan recognition protein 1	Pglyrp1	1.61906	0.695153	0.0126087	5	3	23.5667	24.0051	24.2202	24.1819	24.1865	NaN	24.4213	NaN	NaN	24.9017	24.8587	2	2	2	19.2	19.2	19.2	20.489	0	17.069	311440000	14	2	2	2	2	2	1	2	1	1	2	2	1	0	0	0	0	1	0	0
P01878	P01878	Ig alpha chain C region		3.4924	1.80422	0.0127222	3	5	NaN	NaN	20.4819	21.7497	21.7814	NaN	23.3606	24.1458	22.7559	23.126	22.3209	3	3	3	10.8	10.8	10.8	36.875	0	34.373	135160000	12	1	1	2	2	2	0	2	3	2	2	2	0	0	0	0	0	0	1	0
Q04857	Q04857	Collagen alpha-1(VI) chain	Col6a1	0.646949	-0.628276	0.0142512	6	5	23.0206	23.1121	23.0194	22.432	22.729	22.2843	22.5804	21.6386	22.0628	22.1709	22.2371	5	5	5	6.7	6.7	6.7	108.49	0	22.216	106480000	13	4	5	5	3	5	4	3	2	3	4	4	0	0	0	0	1	1	0	0
Q91V98	Q91V98	Endosialin	Cd248	0.598277	-0.741115	0.014762	4	4	NaN	21.4123	20.8654	NaN	21.2684	21.37	NaN	20.0096	20.8657	20.4625	20.6138	2	2	2	3.3	3.3	3.3	81.812	0	6.6651	30522000	8	1	2	2	2	2	2	1	2	2	2	2	0	0	1	0	0	0	0	0
Q9ET66	Q9ET66	Peptidase inhibitor 16	Pi16	0.694543	-0.525863	0.0172265	6	5	22.9621	22.9583	22.5775	22.7931	22.8796	22.7211	22.5033	21.6215	22.1515	22.5559	22.6149	4	4	4	12.5	12.5	12.5	52.664	0	6.1272	111440000	13	4	4	4	4	3	3	3	2	3	4	4	0	0	0	0	0	1	0	0
Q61207	Q61207	Prosaposin	Psap	0.755472	-0.40455	0.0174461	6	5	27.1722	26.889	27.109	27.2888	27.0385	27.0382	26.8294	26.2773	26.5849	27.112	26.62	16	16	16	34.1	34.1	34.1	61.422	0	45.008	2322900000	110	12	15	16	14	15	12	11	13	15	16	15	0	0	0	0	0	1	0	0
Q04646	Q04646	Sodium/potassium-transporting ATPase subunit gamma	Fxyd2	0.722516	-0.468899	0.0180628	6	5	23.0267	23.5701	22.8137	22.8559	23.194	22.8915	22.398	22.2655	22.7076	22.8326	22.745	3	3	3	44.3	44.3	44.3	7.5194	0	12.115	135880000	13	3	2	3	3	3	3	3	3	3	3	2	0	0	1	0	0	0	0	0
O09114	O09114	Prostaglandin-H2 D-isomerase	Ptgds	0.593288	-0.753194	0.0180954	6	5	33.1235	32.4974	32.9149	33.0131	32.6779	32.597	32.6849	31.1082	31.9939	32.2794	32.1875	15	15	15	51.3	51.3	51.3	21.066	0	323.31	108440000000	169	10	14	14	14	12	9	10	13	11	14	13	1	1	1	0	0	1	0	0
P01868;P01869	P01868;P01869	Ig gamma-1 chain C region secreted form;Ig gamma-1 chain C region, membrane-bound form	Ighg1	4.85955	2.28082	0.0193751	3	5	24.2518	24.1136	NaN	23.6531	NaN	NaN	25.4396	26.4157	26.2721	25.1318	28.1755	7	7	7	24.1	24.1	24.1	35.704	0	53.692	1299100000	33	3	3	1	5	1	1	5	7	5	5	6	0	0	1	0	0	1	0	0
Q9Z0L8	Q9Z0L8	Gamma-glutamyl hydrolase	Ggh	1.44632	0.532386	0.0200845	6	5	24.4614	23.8131	23.9707	24.2447	24.4497	24.8718	24.9862	24.512	24.8997	24.9731	24.8005	8	8	8	28.7	28.7	28.7	35.469	0	39.291	481840000	41	4	5	7	8	7	5	5	4	7	8	8	0	0	0	0	0	1	0	0
Q640N1;Q9D2L5	Q640N1	Adipocyte enhancer-binding protein 1	Aebp1	0.423751	-1.23871	0.0208001	6	5	24.7371	24.9956	26.1147	25.7828	25.44	24.1797	23.7028	24.5801	24.8755	23.0006	23.689	19	19	19	22.8	22.8	22.8	128.36	0	65.982	603780000	67	10	14	18	13	13	7	6	14	13	6	8	1	1	0	0	0	1	0	0
P47877	P47877	Insulin-like growth factor-binding protein 2	Igfbp2	0.694661	-0.525618	0.0212326	6	5	28.2854	28.6934	28.6742	28.8538	28.6869	28.7111	28.4052	27.7999	28.6615	27.656	28.1033	17	17	17	56.7	56.7	56.7	32.846	0	323.31	6816500000	126	12	16	14	16	13	14	11	15	15	15	14	0	0	0	0	0	1	0	0
P08226;CON__Q03247;Q8VHG0	P08226	Apolipoprotein E	Apoe	0.720725	-0.47248	0.0217992	6	5	33.4139	33.576	33.2464	33.8226	33.8775	33.7236	33.337	32.7405	33.5427	32.9108	33.1566	25	25	25	59.2	59.2	59.2	35.866	0	323.31	217560000000	373	20	23	23	22	22	21	20	24	24	24	23	0	0	0	0	0	1	0	0
Q8VCM7	Q8VCM7	Fibrinogen gamma chain	Fgg	2.41128	1.2698	0.0224047	6	5	24.7578	23.7482	24.6047	24.4305	25.5477	24.9187	25.5286	27.5756	25.6386	25.2462	25.6994	15	15	15	40.4	40.4	40.4	49.391	0	74.396	1441200000	49	7	6	11	8	10	6	7	14	8	9	10	0	0	0	0	0	1	0	0
Q9D6X6	Q9D6X6	Serine protease 23	Prss23	0.587525	-0.767278	0.0235614	6	5	23.0222	23.0586	22.2699	23.0274	23.0041	23.3582	22.6556	21.281	21.9886	22.57	22.4521	3	3	3	9.4	9.4	9.4	43.071	0	7.8962	117240000	17	3	3	2	3	3	2	3	2	3	3	3	0	0	0	0	0	1	0	0
B2RXS4	B2RXS4	Plexin-B2	Plxnb2	0.585547	-0.772142	0.0237872	6	5	23.6392	23.3554	23.5884	23.547	23.9193	23.6581	22.6584	21.7676	23.0324	23.4232	23.3472	8	8	8	5.8	5.8	5.8	206.23	0	19.037	194240000	29	6	8	7	6	7	4	3	6	4	8	6	0	0	1	0	0	0	0	0
P35951	P35951	Low-density lipoprotein receptor	Ldlr	0.643773	-0.635375	0.025039	6	4	22.3734	22.2057	22.6957	22.6384	22.3006	22.7955	22.5895	NaN	21.6059	21.7746	21.4947	5	5	5	7.5	7.5	7.5	94.946	0	10.686	78838000	8	2	5	3	3	4	4	2	1	2	4	3	0	0	1	0	0	0	0	0
P08121;CON__P04258	P08121	Collagen alpha-1(III) chain	Col3a1	0.537787	-0.894894	0.0257801	6	5	24.6855	24.1466	25.2021	24.509	23.7726	24.5247	24.4072	22.7425	23.6174	23.247	23.8787	8	8	8	5.5	5.5	5.5	138.94	0	50.675	344230000	31	5	5	6	8	3	6	6	5	5	4	6	0	0	0	0	1	1	0	0
P03987	P03987	Ig gamma-3 chain C region		0.342657	-1.54516	0.0264099	6	5	28.4948	28.5727	25.8059	26.8754	26.9363	28.1238	27.1271	26.0761	25.7497	25.209	25.453	14	14	14	35.2	35.2	35.2	43.929	0	95.712	2940400000	83	9	13	9	9	7	5	9	13	11	9	5	0	0	1	0	0	1	0	0
P68134;P68033;P62737;P63268	P68134;P68033;P62737;P63268	Actin, alpha skeletal muscle;Actin, alpha cardiac muscle 1;Actin, aortic smooth muscle;Actin, gamma-enteric smooth muscle	Acta1;Actc1;Acta2;Actg2	2.02553	1.0183	0.0285285	5	5	22.195	22.9487	22.8334	NaN	22.9786	22.5524	22.8681	24.6185	22.981	23.7792	24.3529	17	5	5	50.7	23.1	23.1	42.051	0	18.364	261200000	15	2	2	3	1	2	2	3	4	2	3	4	1	0	0	0	0	0	0	0
Q00724	Q00724	Retinol-binding protein 4	Rbp4	0.633819	-0.657857	0.0290239	6	5	26.2191	25.7479	26.6302	26.7347	26.1492	25.9463	26.2236	25.3321	25.5824	25.0003	25.7617	6	6	6	34.3	34.3	34.3	23.206	0	74.561	1270200000	38	4	5	5	4	3	3	4	6	5	5	5	0	0	0	0	0	1	0	0
P02468	P02468	Laminin subunit gamma-1	Lamc1	0.691604	-0.531983	0.0300069	6	5	23.7674	24.0149	23.753	23.8325	23.9846	23.5285	23.7254	22.513	23.477	23.1765	23.5155	11	11	11	8.6	8.6	8.6	177.3	0	29.481	234350000	32	6	8	10	8	9	5	5	6	10	9	9	0	0	0	0	1	1	0	0
Q61805	Q61805	Lipopolysaccharide-binding protein	Lbp	0.628527	-0.669953	0.0313216	6	5	27.3114	27.7046	27.1999	26.5843	26.5342	27.1354	26.5321	25.7254	26.3285	26.745	26.7108	13	13	13	29.9	29.9	29.9	53.055	0	143.78	2293800000	99	9	11	12	11	12	9	9	12	11	10	11	0	0	1	0	0	1	0	0
Q00897	Q00897	Alpha-1-antitrypsin 1-4	Serpina1d	2.54984	1.3504	0.0318226	6	5	29.644	30.1945	28.767	29.843	28.6704	27.3387	30.1545	31.4768	30.2671	29.8766	30.3584	30	30	12	57.9	57.9	27.6	45.998	0	323.31	24998000000	96	7	11	9	10	6	5	7	12	11	11	8	0	0	0	0	0	1	0	0
P97821	P97821	Dipeptidyl peptidase 1;Dipeptidyl peptidase 1 exclusion domain chain;Dipeptidyl peptidase 1 heavy chain;Dipeptidyl peptidase 1 light chain	Ctsc	1.64546	0.718494	0.0318737	6	5	22.131	22.4046	22.3884	22.3401	22.4684	22.333	22.9156	22.206	22.8786	24.1078	23.2058	6	6	6	16.5	16.5	16.5	52.376	0	22.866	146720000	16	2	3	4	3	3	2	2	5	4	5	4	0	0	0	0	0	0	1	0
Q9WVJ3	Q9WVJ3	Carboxypeptidase Q	Cpq	0.692381	-0.530362	0.0321709	6	5	25.6147	25.4445	25.713	25.445	25.7672	25.4434	25.4136	24.2244	25.3957	24.9564	25.2147	9	9	9	27.4	27.4	27.4	51.813	0	61.273	798920000	49	5	7	7	7	6	4	3	6	7	6	6	0	0	0	0	0	1	0	0
P48299	P48299	Endothelin-3	Edn3	0.50522	-0.985016	0.0324407	5	3	NaN	23.6076	22.9383	22.8539	22.8837	23.1273	NaN	21.3184	NaN	22.2385	22.7345	2	2	2	12.1	12.1	12.1	23.322	0	7.0232	117990000	10	1	2	2	2	2	2	1	2	1	2	2	0	0	0	0	0	1	0	0
Q8R121	Q8R121	Protein Z-dependent protease inhibitor	Serpina10	2.14002	1.09763	0.0333704	6	5	23.5144	23.2633	24.0359	23.4456	24.1413	23.8706	24.6907	26.5474	23.9647	24.3122	24.5323	9	9	9	25.9	25.9	25.9	51.797	0	103.84	602750000	49	3	7	7	7	7	6	6	8	7	7	7	0	0	0	0	0	1	0	0
P06728;CON__Q32PJ2;REV__Q9JIW4;P27545;Q62036	P06728	Apolipoprotein A-IV	Apoa4	0.449595	-1.1533	0.0333952	6	5	31.4959	31.4261	30.6835	31.2068	31.1501	31.3766	30.398	31.4201	29.9468	28.3985	30.1859	34	34	34	69.4	69.4	69.4	45.029	0	323.31	40533000000	314	22	29	27	27	29	25	19	33	26	26	27	0	0	0	0	0	1	0	0
Q9JME9	Q9JME9	V-set and transmembrane domain-containing protein 2B	Vstm2b	1.29742	0.375648	0.0376121	3	4	NaN	22.6225	22.6385	22.9934	NaN	NaN	NaN	23.3181	23.0846	23.1428	22.9631	3	3	3	13.7	13.7	13.7	30.159	0	12.384	124500000	14	1	3	2	2	0	0	1	2	3	3	3	0	0	1	0	0	0	0	0
Q61282	Q61282	Aggrecan core protein	Acan	0.729467	-0.455086	0.0382491	6	4	23.6253	23.955	23.5923	23.4785	23.2911	23.2555	23.4606	NaN	23.053	23.1313	22.6666	6	6	6	4	4	4	221.94	0	11.346	174690000	23	4	5	6	6	6	5	5	1	4	6	5	0	0	0	0	1	1	0	0
Q05793	Q05793	Basement membrane-specific heparan sulfate proteoglycan core protein;Endorepellin;LG3 peptide	Hspg2	0.730078	-0.453878	0.0384322	6	5	25.5972	26.2161	26.2166	26.1804	26.0943	25.6389	25.6765	24.9916	25.5084	25.6471	25.86	12	12	12	4.2	4.2	4.2	398.29	0	49.501	1094700000	62	6	12	9	9	10	7	10	10	9	9	6	0	0	0	0	1	1	0	0
Q61330	Q61330	Contactin-2	Cntn2	0.69089	-0.533471	0.0393255	6	5	27.6493	27.4661	27.3396	27.3076	27.5962	27.9316	27.5203	26.2194	27.0782	27.2237	27.0331	26	26	26	33	33	33	113.22	0	160.71	2962300000	144	17	21	19	21	19	14	13	23	23	23	19	0	0	1	0	0	0	0	1
Q07797	Q07797	Galectin-3-binding protein	Lgals3bp	0.642735	-0.637704	0.0394334	6	5	24.8544	24.3934	24.5225	24.2439	24.5696	24.8742	24.6795	23.1882	23.661	23.7828	24.3816	13	13	13	28.8	28.8	28.8	64.49	0	38.705	365310000	56	6	9	9	8	8	7	7	7	8	9	11	0	0	0	0	1	1	0	0
Q9Z1Q5	Q9Z1Q5	Chloride intracellular channel protein 1	Clic1	0.629534	-0.667645	0.0411877	6	5	20.8001	21.6972	21.5771	20.8835	20.7804	21.9522	20.3554	20.9218	20.6665	21.0161	20.1107	3	3	3	17.4	17.4	17.4	27.013	0	10.174	42124000	4	2	3	3	3	2	2	2	3	2	3	2	1	1	1	0	0	0	0	0
E9PUL5	E9PUL5	Proline-rich transmembrane protein 2	Prrt2	0.661565	-0.596045	0.0444675	5	3	22.525	21.7645	NaN	21.7879	21.529	22.0536	21.3235	NaN	21.1926	NaN	21.4918	2	2	2	12.4	12.4	12.4	35.923	0	4.735	43531000	6	2	2	1	2	2	2	2	0	2	1	2	0	0	1	0	0	0	0	0
Q61292	Q61292	Laminin subunit beta-2	Lamb2	0.699036	-0.516561	0.0452191	6	5	24.8826	24.9129	24.8267	24.933	24.9023	24.323	24.5578	23.4296	24.5101	24.3404	24.5631	19	19	19	13.7	13.7	13.7	196.58	0	53.059	470290000	66	8	16	19	16	15	10	13	13	17	15	16	0	0	0	0	1	1	0	0
P62984;P62983;P0CG49;P0CG50	P62984;P62983;P0CG49;P0CG50	Ubiquitin-60S ribosomal protein L40;Ubiquitin;60S ribosomal protein L40;Ubiquitin-40S ribosomal protein S27a;Ubiquitin;40S ribosomal protein S27a;Polyubiquitin-B;Ubiquitin;Polyubiquitin-C;Ubiquitin;Ubiquitin-related 1;Ubiquitin-related 2	Uba52;Rps27a;Ubb;Ubc	0.752443	-0.410345	0.0460302	5	4	22.0616	21.8579	21.5263	21.7369	21.7507	NaN	21.6744	NaN	20.9371	21.4853	21.4085	2	2	2	19.5	19.5	19.5	14.728	0	7.2667	50089000	8	2	2	2	2	2	1	2	1	2	2	2	1	1	0	0	0	0	0	0
P80560	P80560	Receptor-type tyrosine-protein phosphatase N2	Ptprn2	0.600478	-0.735818	0.0465547	6	5	27.3488	27.1885	26.4246	26.7582	26.9507	27.3508	26.8292	25.0919	26.4955	26.4992	26.4232	16	16	16	19	19	19	111.5	0	171.89	1960400000	89	10	12	13	13	12	11	13	10	13	13	13	0	0	1	0	0	0	0	0
P37889	P37889	Fibulin-2	Fbln2	0.652735	-0.61543	0.0465767	6	5	22.6243	23.4264	22.7643	22.9552	22.5338	22.6901	21.9773	21.3834	22.8166	22.455	22.4523	4	4	4	5	5	5	131.83	0	18.324	124140000	15	2	4	4	4	4	3	2	3	4	4	3	0	0	0	0	1	1	0	0
P32648	P32648	VIP peptides;Intestinal peptide PHI-42;Intestinal peptide PHI-27;Vasoactive intestinal peptide	Vip	0.606256	-0.722001	0.0474459	6	5	23.5453	24.113	23.3986	23.4828	23.4746	23.6727	22.5596	21.7996	23.1219	23.583	23.3985	2	2	2	21.8	21.8	21.8	19.048	0	9.5179	239650000	19	2	2	2	2	2	2	2	2	2	2	2	0	0	0	0	0	1	0	0
Q7TMR0	Q7TMR0	Lysosomal Pro-X carboxypeptidase	Prcp	1.31754	0.397842	0.0476185	6	5	22.0126	21.7345	22.046	22.1735	21.7093	22.058	22.1488	21.8554	22.4254	22.8511	22.4869	4	4	4	12	12	12	55.026	0	9.3175	89643000	12	2	3	3	3	2	3	3	3	4	3	3	0	0	0	0	0	0	1	0
P46460	P46460	Vesicle-fusing ATPase	Nsf	0.759696	-0.396505	0.049439	6	5	23.6811	23.8677	23.6472	23.6465	23.6377	23.7484	23.4385	22.5626	23.4668	23.5954	23.478	6	6	6	9	9	9	82.613	0	20.611	228070000	33	4	6	4	5	4	5	3	5	6	6	5	1	0	0	0	0	0	0	0
Q8K0E8;CON__P02676	Q8K0E8	Fibrinogen beta chain;Fibrinopeptide B;Fibrinogen beta chain	Fgb	2.38671	1.25502	0.0497535	6	5	24.2161	23.4011	24.0857	24.3309	25.0175	24.3719	25.0711	27.6861	24.9169	24.6309	25.1561	16	16	16	37.4	37.4	37.4	54.752	0	205.36	1168700000	54	3	4	5	5	6	5	5	16	7	6	8	0	0	0	0	0	1	0	0
P01671;P01673;P01672;P01670;P01668;P01663;P01662;P03977;P01669;P01667;P01666;P01665;P01664;P01660;P01657;P01656;P01654;P01659;P01655;P01661	P01671;P01673;P01672;P01670	Ig kappa chain V-III region PC 7175;Ig kappa chain V-III region PC 2485/PC 4039;Ig kappa chain V-III region PC 7940;Ig kappa chain V-III region PC 6684		2.46543	1.30184	0.0502636	5	5	21.2402	19.7479	21.8465	21.6293	22.0971	NaN	21.7146	23.7415	23.2406	21.9626	22.4108	3	3	3	40.5	40.5	40.5	12.01	0	23.995	111740000	17	1	1	1	1	1	1	2	3	3	1	1	0	0	0	0	0	0	1	0
O88783	O88783	Coagulation factor V;Coagulation factor V heavy chain;Coagulation factor V light chain	F5	0.825636	-0.276423	0.0518126	6	5	25.5711	25.656	25.7466	25.5124	25.85	25.3255	25.274	25.1275	25.6841	25.1675	25.4161	31	31	29	17.6	17.6	16.7	247.23	0	91.938	936080000	93	10	20	21	16	17	11	11	24	23	20	16	0	0	0	0	0	1	0	0
Q9CZT5	Q9CZT5	Vasorin	Vasn	0.656383	-0.60739	0.0525536	6	5	23.4009	24.0963	23.2464	23.0219	23.0924	23.8338	22.9495	22.0463	22.855	23.2959	23.0595	5	5	5	9.2	9.2	9.2	72.26	0	14.424	170040000	12	3	4	4	4	5	5	5	3	3	3	5	0	0	1	0	0	0	0	0
Q61147;CON__ENSEMBL:ENSBTAP00000031900	Q61147	Ceruloplasmin	Cp	1.30462	0.383632	0.0547232	6	5	29.575	29.7853	29.8538	30.0514	29.9498	29.6719	29.8516	30.7207	29.7909	30.3413	30.2863	62	62	62	53.7	53.7	53.7	121.15	0	323.31	23581000000	503	40	50	47	47	43	34	36	58	49	49	45	0	0	0	0	0	1	0	0
Q71KU9	Q71KU9	Fibrinogen-like protein 1	Fgl1	2.33838	1.22551	0.058038	3	4	NaN	NaN	22.5585	NaN	22.1558	21.4471	23.267	NaN	22.3713	24.104	23.375	5	5	5	18.2	18.2	18.2	36.439	0	10.382	102580000	13	1	1	3	1	4	2	3	1	4	4	5	0	0	0	0	0	1	0	0
P47867	P47867	Secretogranin-3	Scg3	0.716821	-0.480315	0.0609435	6	5	30.6191	30.8078	30.1574	30.5661	30.5152	30.6296	30.4397	29.2176	30.372	30.2854	30.0297	30	30	30	62.2	62.2	62.2	53.326	0	323.31	25219000000	320	24	29	26	27	25	25	25	27	27	27	28	0	0	1	0	0	1	0	0
Q07079	Q07079	Insulin-like growth factor-binding protein 5	Igfbp5	0.817656	-0.290434	0.0615092	6	5	24.9013	24.9237	24.4512	24.7162	24.5144	24.6785	24.7951	24.1042	24.3957	24.2666	24.4739	7	7	7	37.6	37.6	37.6	30.372	0	22.658	483470000	39	4	5	5	5	5	5	4	5	5	5	5	0	0	0	0	0	1	0	0
P20029	P20029	78 kDa glucose-regulated protein	Hspa5	0.830435	-0.26806	0.0620996	6	5	25.473	25.8008	25.5084	25.6235	25.5596	25.7207	25.6102	24.9262	25.2638	25.5824	25.3488	21	21	19	34	34	32.4	72.421	0	82.742	868930000	95	14	16	18	16	15	13	15	11	16	16	15	1	0	0	0	0	0	0	0
Q99M71	Q99M71	Mammalian ependymin-related protein 1	Epdr1	1.48232	0.567855	0.0631435	4	4	NaN	21.2048	NaN	21.1121	21.7763	22.1052	22.2895	NaN	22.0141	21.9529	22.2133	3	3	3	16.1	16.1	16.1	25.485	0	5.5085	56976000	7	1	3	0	2	2	2	2	1	2	2	2	0	0	0	0	0	1	0	0
Q8BYM5	Q8BYM5	Neuroligin-3	Nlgn3	0.703492	-0.507394	0.0679925	6	4	22.2982	22.6023	21.8016	22.0621	21.9967	22.6209	NaN	21.1591	21.7142	22.1928	21.8255	5	5	4	8.4	8.4	6.8	91.161	0	7.8445	77899000	17	2	4	3	4	3	2	1	2	3	4	4	0	0	1	0	0	0	0	0
P23953;Q8VCT4	P23953	Carboxylesterase 1C	Ces1c	1.60891	0.686086	0.0690014	6	5	24.3175	24.0164	22.8983	24.3103	24.1749	23.8207	24.8504	24.5272	24.1932	24.0294	25.4452	11	11	9	19.1	19.1	16.2	61.055	0	52	438830000	36	5	9	6	7	7	5	6	7	7	8	8	0	0	0	0	0	0	1	0
P09581	P09581	Macrophage colony-stimulating factor 1 receptor	Csf1r	0.733319	-0.447487	0.069238	6	5	25.4229	25.2139	25.1091	25.4326	25.2084	25.5128	25.1272	23.982	25.2391	25.0384	24.9591	11	11	11	9.8	9.8	9.8	109.18	0	126.94	679560000	66	8	9	10	11	9	7	7	9	10	10	9	0	0	1	0	0	0	0	0
Q00898	Q00898	Alpha-1-antitrypsin 1-5	Serpina1e	5.26239	2.39572	0.0703335	6	5	30.821	30.8185	29.9011	31.1248	26.039	25.72	31.4377	32.5694	31.4825	30.6178	31.2248	26	13	12	44.6	27.4	23.7	45.891	0	323.31	48513000000	134	8	10	10	9	4	4	7	12	11	10	9	0	0	0	0	0	1	0	0
Q8K1B9	Q8K1B9	Polypeptide N-acetylgalactosaminyltransferase 18	Galnt18	0.806747	-0.309812	0.0704601	5	4	NaN	21.8293	21.6155	21.8266	22.0301	21.9366	21.1229	NaN	21.6697	21.7184	21.6401	4	4	4	7.9	7.9	7.9	71.095	0	7.1706	52319000	12	0	3	2	4	2	2	2	0	3	3	2	0	0	1	0	0	0	0	0
P46412;P21765	P46412	Glutathione peroxidase 3	Gpx3	1.68137	0.74964	0.0706186	6	5	24.5682	23.9245	24.0403	24.8961	24.4485	24.5111	24.9466	26.5822	24.884	24.6731	24.6529	6	6	6	32.3	32.3	32.3	25.424	0	19.724	865020000	39	3	5	5	3	4	4	5	5	6	6	6	0	0	0	0	0	1	0	0
P16125;P00342	P16125	L-lactate dehydrogenase B chain	Ldhb	0.709784	-0.494548	0.070823	6	5	27.0219	26.764	27.5045	26.7907	26.6137	27.3028	26.692	25.8976	26.6185	27.0896	26.2274	14	14	13	48.2	48.2	44.6	36.572	0	82.148	2196400000	103	10	12	13	11	13	9	12	12	12	12	12	1	0	0	0	0	0	0	0
O55241	O55241	Orexin;Orexin-A;Orexin-B	Hcrt	0.575677	-0.796668	0.0710888	6	4	27.1541	26.6947	26.3291	26.64	26.9628	27.4348	NaN	24.8871	26.2719	26.3421	26.7893	2	2	2	10.8	10.8	10.8	13.503	0	6.8657	1641200000	19	2	2	2	2	1	1	1	2	2	2	2	0	0	0	0	0	0	1	0
P28798	P28798	Granulins;Acrogranin;Granulin-1;Granulin-2;Granulin-3;Granulin-4;Granulin-5;Granulin-6;Granulin-7	Grn	0.820646	-0.285168	0.0714203	6	5	23.6728	23.5175	23.8304	24.2904	23.7899	23.5248	23.4988	23.3742	23.3288	23.623	23.6041	7	7	7	19	19	19	63.458	0	20.997	253560000	27	5	4	5	6	4	5	3	7	6	6	5	0	0	0	0	0	1	0	0
P49182;CON__ENSEMBL:ENSBTAP00000018574	P49182	Heparin cofactor 2	Serpind1	0.83914	-0.253017	0.0715552	6	5	27.651	27.3483	27.6613	27.8554	27.4985	27.6137	27.5475	27.6464	27.2588	27.0559	27.25	18	18	18	42.7	42.7	42.7	54.496	0	179.23	3702200000	148	12	17	15	14	15	13	10	17	17	16	14	0	0	0	0	0	0	1	0
Q61790	Q61790	Lymphocyte activation gene 3 protein	Lag3	0.64794	-0.626069	0.0720163	5	4	NaN	20.6342	21.363	21.7105	21.8429	21.4044	20.7431	NaN	21.3068	20.6645	20.3454	3	3	3	7.7	7.7	7.7	56.977	0	4.2267	38901000	3	1	3	3	3	2	2	3	1	2	3	3	0	0	1	0	0	0	0	0
A6X935;CON__Q3T052	A6X935	Inter alpha-trypsin inhibitor, heavy chain 4	Itih4	2.41016	1.26913	0.0732258	6	5	24.7293	24.7427	26.2665	25.4881	26.2463	25.1098	26.7044	29.0054	26.0221	25.6924	26.0737	34	34	34	47.2	47.2	47.2	104.66	0	323.31	2886200000	106	7	8	15	11	12	8	13	33	20	15	16	0	0	0	0	0	1	0	0
Q9R118	Q9R118	Serine protease HTRA1	Htra1	0.748972	-0.417017	0.0732556	6	5	23.8866	23.8626	23.7926	23.7975	23.6357	23.7279	23.5607	22.5154	23.6469	23.7608	23.3502	5	5	5	14.8	14.8	14.8	51.213	0	13.611	231280000	24	4	5	5	5	5	4	4	5	5	4	4	1	0	1	0	0	1	0	0
P08905;P17897	P08905;P17897	Lysozyme C-2;Lysozyme C-1	Lyz2;Lyz1	0.678487	-0.559606	0.0747568	6	5	26.2947	26.2207	26.4073	26.9809	26.4512	26.5376	26.1323	24.8311	26.2648	26.0611	26.3229	7	7	7	46.6	46.6	46.6	16.689	0	78.336	1441600000	43	6	4	6	5	7	5	6	6	7	7	7	0	0	0	0	0	1	0	0
Q8CIZ8	Q8CIZ8	von Willebrand factor;von Willebrand antigen 2	Vwf	1.76622	0.820664	0.0755807	6	5	22.2765	23.4133	24.1998	23.628	23.8715	22.3381	23.6867	23.8336	23.7908	24.5792	24.6524	19	19	19	9.8	9.8	9.8	309.27	0	41.941	295290000	49	5	12	15	9	8	3	8	13	14	18	17	0	0	0	0	1	1	0	0
Q61581	Q61581	Insulin-like growth factor-binding protein 7	Igfbp7	1.1459	0.196484	0.0782809	6	5	24.8223	24.8942	24.5726	24.4503	24.7132	24.5794	24.808	24.7281	24.8313	25.139	24.8361	6	6	6	23.8	23.8	23.8	28.969	0	28.981	545640000	43	5	5	3	5	6	3	3	6	6	5	6	0	0	0	0	0	1	0	0
P47880	P47880	Insulin-like growth factor-binding protein 6	Igfbp6	0.752798	-0.409665	0.080871	6	5	24.3844	24.2069	24.7234	24.8388	24.712	24.5003	24.2884	24.295	24.705	23.5278	23.9405	9	9	9	52.5	52.5	52.5	25.346	0	54.882	437370000	39	4	8	9	5	5	4	6	7	8	7	6	0	0	0	0	0	1	0	0
Q8R0P4	Q8R0P4	Mth938 domain-containing protein	Aamdc	0.644894	-0.632865	0.081702	6	5	24.2413	23.9127	23.6079	24.0969	24.0147	24.7333	24.2549	22.4228	23.4325	23.837	23.3941	4	4	4	36.9	36.9	36.9	13.244	0	14.744	260230000	16	2	3	2	3	3	3	3	2	3	4	3	1	0	0	0	0	0	0	0
Q02105	Q02105	Complement C1q subcomponent subunit C	C1qc	0.833505	-0.262737	0.0834659	6	4	23.9883	24.1373	23.9705	24.3357	24.1582	24.106	23.7941	23.749	NaN	23.6008	24.2692	3	3	3	16.3	16.3	16.3	25.991	0	10.323	301950000	24	3	3	2	2	2	2	3	3	2	3	3	0	0	0	0	0	1	0	0
Q9CQ01	Q9CQ01	Ribonuclease T2	Rnaset2	0.784378	-0.350378	0.0892343	6	5	24.6721	23.9098	24.0476	24.0362	23.8781	24.2956	24.1548	23.3037	23.7988	23.7869	23.9034	6	6	6	21.6	21.6	21.6	29.608	0	29.958	295250000	30	5	5	4	4	5	4	5	5	4	4	4	0	0	0	0	0	1	0	0
Q9CRB6	Q9CRB6	Tubulin polymerization-promoting protein family member 3	Tppp3	0.630244	-0.666017	0.0925749	5	3	21.1505	22.4063	21.6922	21.3175	21.783	NaN	NaN	NaN	20.6468	21.415	20.9499	3	3	3	15.9	15.9	15.9	18.965	0	12.531	54452000	9	2	3	2	2	2	1	1	1	2	2	2	1	0	0	0	0	0	0	0
P56376	P56376	Acylphosphatase-1	Acyp1	0.650166	-0.62112	0.0926931	6	5	23.5978	23.8998	23.4811	23.5185	23.2897	23.3791	23.2538	21.5418	23.1962	23.5164	23.0244	3	3	3	39.4	39.4	39.4	11.241	0	28.941	188410000	21	3	3	3	3	3	3	3	3	3	3	3	0	0	0	0	0	0	1	0
O35684	O35684	Neuroserpin	Serpini1	0.707335	-0.499534	0.0935436	6	5	25.5703	25.3291	25.1162	24.5347	25.2303	25.2867	24.8559	23.7577	24.7456	24.9135	25.1191	10	10	10	26.3	26.3	26.3	46.347	0	44.789	562440000	48	7	10	9	8	8	7	7	8	7	9	8	0	0	0	0	0	1	0	0
Q62165	Q62165	Dystroglycan;Alpha-dystroglycan;Beta-dystroglycan	Dag1	0.749754	-0.41551	0.0943966	6	5	26.1039	25.8382	26.3302	26.3388	26.0482	26.3092	26.2173	24.9152	25.678	25.9921	25.9271	9	9	9	12.8	12.8	12.8	96.904	0	92.446	1352700000	66	8	9	8	9	9	8	8	9	9	8	7	1	1	1	0	0	1	0	0
P97291	P97291	Cadherin-8	Cdh8	0.580177	-0.785435	0.094521	6	5	23.0761	22.8693	22.6834	23.0058	23.1013	23.3406	23.2491	20.5709	22.615	22.1057	22.5957	4	4	4	5	5	5	88.214	0	6.6765	118360000	7	3	4	4	4	4	4	4	2	3	3	4	0	0	1	0	0	0	0	0
P56942	P56942	Pro-MCH;Neuropeptide-glycine-glutamic acid;Neuropeptide-glutamic acid-isoleucine;Melanin-concentrating hormone	Pmch	0.620677	-0.688086	0.0965097	5	5	26.0136	25.1096	25.1573	26.4596	25.8202	NaN	25.3073	24.8512	25.8828	24.4347	24.6438	6	6	6	36.4	36.4	36.4	18.516	0	24.339	893150000	34	4	5	5	5	3	1	3	5	6	5	4	0	0	0	0	0	1	0	0
P01867	P01867	Ig gamma-2B chain C region	Igh-3	2.19239	1.13251	0.0979141	6	5	26.4179	24.3648	25.6721	27.6943	26.8994	25.47	27.1774	27.2595	27.4852	26.0248	28.1476	11	11	11	26.2	26.2	26.2	44.259	0	55.28	2652800000	70	8	7	7	10	9	6	7	11	9	8	8	0	0	1	0	0	1	0	0
P12246	P12246	Serum amyloid P-component	Apcs	2.69801	1.43189	0.0980208	6	5	23.5983	22.625	26.2802	23.757	25.3165	24.3662	26.3527	27.5122	24.1827	25.4144	25.3168	9	9	9	27.2	27.2	27.2	26.247	0	310.61	1196100000	38	3	3	5	4	4	6	5	9	5	6	6	0	0	0	0	0	1	0	0
Q9WVJ9	Q9WVJ9	EGF-containing fibulin-like extracellular matrix protein 2	Efemp2	0.771824	-0.373657	0.102822	6	5	24.0257	23.843	24.2307	24.1579	24.2152	23.5945	24.2164	23.0719	23.5575	23.494	23.8476	9	9	9	29.1	29.1	29.1	49.425	0	25.909	279050000	31	5	8	8	8	7	6	7	7	8	7	7	0	0	0	0	0	1	0	0
E9PV24	E9PV24	Fibrinogen alpha chain;Fibrinopeptide A;Fibrinogen alpha chain	Fga	2.18551	1.12797	0.103396	6	5	26.3277	25.3835	26.0279	26.1691	27.1288	26.4617	27.1503	29.8223	26.8684	26.2635	26.7841	26	26	26	39.5	39.5	39.5	87.428	0	186.93	5036700000	100	9	12	9	11	12	9	10	26	15	12	13	0	0	0	0	0	1	0	0
P35822	P35822	Receptor-type tyrosine-protein phosphatase kappa	Ptprk	0.757242	-0.401174	0.10386	6	5	23.175	22.606	22.5616	22.4589	22.749	22.7041	22.6554	21.4959	22.4124	22.6245	22.3513	7	7	7	6.5	6.5	6.5	164.18	0	13.876	108940000	18	4	5	7	4	5	4	4	4	6	5	3	0	0	1	0	0	0	0	0
P00687;CON__Q3MHH8	P00687	Alpha-amylase 1	Amy1	1.28763	0.36472	0.107064	6	5	22.7609	23.0716	23.3187	22.78	22.6254	23.2368	22.7363	23.7562	23.3273	23.2305	23.6009	10	10	6	23.7	23.7	13.5	57.643	0	47.514	190980000	40	4	6	6	4	4	4	4	6	6	5	6	0	0	0	0	0	1	0	0
Q9R0M0	Q9R0M0	Cadherin EGF LAG seven-pass G-type receptor 2	Celsr2	1.33435	0.41614	0.107728	6	5	23.3288	23.029	22.8865	23.318	23.8633	23.7814	23.7885	23.6078	24.4313	23.5135	23.5786	6	6	6	3.9	3.9	3.9	317.59	0	24.145	272460000	18	2	3	2	3	2	2	2	4	4	4	3	0	0	1	0	0	0	0	0
Q91ZX7;Q9JI18	Q91ZX7	Prolow-density lipoprotein receptor-related protein 1;Low-density lipoprotein receptor-related protein 1 85 kDa subunit;Low-density lipoprotein receptor-related protein 1 515 kDa subunit;Low-density lipoprotein receptor-related protein 1 intracellular domain	Lrp1	0.778047	-0.362071	0.109219	6	5	25.6839	25.5053	25.3068	25.4766	25.5492	25.7463	25.5515	24.3669	25.2812	25.4661	25.2473	29	29	29	8.2	8.2	8.2	504.74	0	69.656	796130000	96	19	23	23	19	16	18	13	16	23	20	21	1	1	1	0	0	0	0	0
P16675	P16675	Lysosomal protective protein;Lysosomal protective protein 32 kDa chain;Lysosomal protective protein 20 kDa chain	Ctsa	0.817731	-0.290301	0.109368	6	5	26.3724	26.4455	26.0755	26.4471	26.5183	26.5839	26.0929	25.5744	26.0812	26.5186	26.317	13	13	13	31.9	31.9	31.9	53.844	0	46.947	1477900000	79	8	8	11	10	9	9	8	11	11	11	11	0	0	0	0	0	0	1	0
Q8BJD1	Q8BJD1	Inter-alpha-trypsin inhibitor heavy chain H5	Itih5	0.831073	-0.266953	0.110976	6	5	25.0418	25.6778	25.3779	25.3771	25.422	25.3757	25.1335	24.5976	25.345	25.2757	25.207	18	18	18	23.7	23.7	23.7	106.75	0	68.476	751820000	58	8	12	13	11	8	11	8	14	11	12	11	0	0	0	0	0	1	0	0
P25785	P25785	Metalloproteinase inhibitor 2	Timp2	0.724555	-0.464833	0.111015	6	5	26.6547	26.3577	25.9657	26.314	26.3633	27.0523	26.4655	25.1424	25.9604	26.1287	26.2352	12	12	12	42.3	42.3	42.3	24.328	0	90.921	1509400000	71	8	11	10	9	7	6	7	9	10	11	10	0	0	0	0	0	1	0	0
Q3U4G3	Q3U4G3	Xyloside xylosyltransferase 1	Xxylt1	0.724336	-0.46527	0.111316	6	5	24.6505	24.9016	24.6396	24.4984	24.6334	24.74	24.6219	23.1118	24.5266	24.5824	24.2172	7	7	7	18.4	18.4	18.4	43.838	0	16.997	423500000	39	5	7	6	5	6	4	4	5	4	6	4	0	0	1	0	0	0	0	0
Q9Z1L5	Q9Z1L5	Voltage-dependent calcium channel subunit alpha-2/delta-3;Voltage-dependent calcium channel subunit alpha-2-3;Voltage-dependent calcium channel subunit delta-3	Cacna2d3	0.744369	-0.425911	0.111398	6	5	24.3411	24.2257	23.8624	23.7254	24.1991	24.3642	24.0491	22.7855	24.0124	23.8364	23.7852	14	14	14	14.8	14.8	14.8	122.78	0	31.595	285850000	42	8	11	11	11	11	10	9	5	13	12	11	0	0	1	0	0	0	0	0
Q69Z26	Q69Z26	Contactin-4	Cntn4	0.738923	-0.436504	0.11504	6	5	23.8302	24.2461	23.4534	24.3395	24.4728	24.3784	24.113	23.0038	23.8869	23.8861	23.5279	7	7	6	7.2	7.2	6.2	113.49	0	20.5	293410000	22	4	6	5	5	4	4	4	2	5	4	3	0	0	1	0	0	1	0	1
O70370	O70370	Cathepsin S	Ctss	1.89689	0.923635	0.115816	4	4	NaN	23.6789	23.1286	22.7313	22.8998	NaN	NaN	22.7113	24.5617	24.7296	24.1305	2	2	2	8.5	8.5	8.5	38.474	0	4.6598	222000000	9	0	2	2	2	2	1	1	1	2	2	2	0	0	0	0	0	0	1	0
Q8BGY3	Q8BGY3	Leucine zipper protein 2	Luzp2	0.542987	-0.881011	0.116903	6	5	23.3479	24.0638	23.303	23.3207	23.5103	23.4679	23.3195	20.5452	23.3955	23.3367	22.5094	3	3	3	13.9	13.9	13.9	39.02	0	7.02	173320000	8	3	3	3	2	3	3	3	2	1	3	2	0	0	0	0	0	1	0	0
Q9Z2W8	Q9Z2W8	Glutamate receptor 4	Gria4	1.28453	0.361236	0.117971	6	5	23.0075	22.9892	23.0264	23.3836	23.3487	23.3022	23.732	22.6983	23.8371	23.6543	23.7659	5	5	5	6.4	6.4	6.4	100.85	0	16.708	202730000	21	3	3	3	4	4	3	3	4	3	4	3	0	0	1	0	0	0	0	0
P09528	P09528	Ferritin heavy chain;Ferritin heavy chain, N-terminally processed	Fth1	0.775048	-0.367643	0.120836	6	5	23.1499	22.8492	22.1975	22.7928	22.4644	22.9844	22.7744	21.7882	22.4397	22.473	22.385	4	4	4	32.4	32.4	32.4	21.066	0	7.6292	117500000	19	3	3	3	3	2	2	2	3	3	2	3	0	0	0	0	0	0	1	0
O08749	O08749	Dihydrolipoyl dehydrogenase, mitochondrial	Dld	1.23797	0.307976	0.122031	5	5	22.337	21.664	22.2107	22.3662	22.2717	NaN	22.8567	22.0902	22.5366	22.425	22.4809	7	7	7	19.6	19.6	19.6	54.272	0	12.803	94731000	13	2	5	5	2	2	1	3	4	6	3	4	0	0	0	1	0	0	0	0
P97298;CON__Q95121	P97298	Pigment epithelium-derived factor	Serpinf1	0.811377	-0.301555	0.123492	6	5	27.9725	28.6459	28.0534	28.4313	28.1994	28.4209	28.1142	27.4002	28.2297	28.1298	28.0546	19	19	19	49.2	49.2	49.2	46.233	0	315.6	5622100000	113	12	15	13	14	14	13	11	18	13	14	13	0	0	0	0	0	1	0	0
P99029	P99029	Peroxiredoxin-5, mitochondrial	Prdx5	0.446147	-1.16441	0.123549	5	3	24.2755	24.4488	23.9862	23.6546	NaN	24.5222	21.4364	NaN	23.2932	24.3096	NaN	3	3	3	20	20	20	21.897	0	5.7546	205240000	5	2	3	2	2	1	2	2	1	2	3	1	1	0	0	1	0	0	0	0
Q61361	Q61361	Brevican core protein	Bcan	0.758216	-0.399319	0.126204	6	5	28.0633	28.0538	27.7512	27.8867	27.851	28.2084	27.9993	26.5942	27.759	27.7288	27.7676	27	27	27	31.5	31.5	31.5	95.814	0	117.27	4302300000	159	19	26	23	20	20	17	20	21	21	23	22	0	0	0	0	1	1	0	0
Q8BWP8	Q8BWP8	Beta-1,4-glucuronyltransferase 1	B4gat1	0.742329	-0.429869	0.127316	6	5	27.013	26.7561	26.6223	26.757	26.8615	27.1831	26.9973	25.4578	26.4736	26.794	26.4553	12	12	12	36.9	36.9	36.9	47.384	0	79.321	1906600000	63	8	9	8	11	11	9	8	10	11	9	9	0	0	1	0	0	0	0	0
P01029;CON__P01030;CON__ENSEMBL:ENSBTAP00000007350	P01029	Complement C4-B;Complement C4 beta chain;Complement C4 alpha chain;C4a anaphylatoxin;Complement C4 gamma chain	C4b	0.916296	-0.126114	0.127764	6	5	29.6575	29.6349	29.829	29.9636	29.6356	29.8887	29.7848	29.6686	29.6369	29.5702	29.5502	70	70	70	45.7	45.7	45.7	192.91	0	323.31	17118000000	493	41	57	59	53	55	45	42	65	60	56	54	0	0	0	0	0	1	0	0
P47878	P47878	Insulin-like growth factor-binding protein 3	Igfbp3	0.644084	-0.634679	0.131281	6	5	23.3374	24.4684	24.888	25.5888	25.2415	24.7868	23.9624	23.5375	24.1837	24.5541	24.1812	7	7	7	28.4	28.4	28.4	31.687	0	26.981	452400000	40	3	5	7	7	7	7	5	5	6	7	7	0	0	0	0	0	1	0	0
P21661	P21661	Neuroendocrine convertase 2	Pcsk2	0.703091	-0.508218	0.132517	6	5	25.4029	25.2058	25.0588	25.0027	25.1629	25.6132	25.2299	23.487	24.7702	25.0585	25.1185	6	6	6	12.4	12.4	12.4	70.785	0	13.025	578510000	26	3	4	4	2	3	3	2	4	4	5	4	0	0	0	0	0	0	1	0
Q9D0M5;P63168	Q9D0M5;P63168	Dynein light chain 2, cytoplasmic;Dynein light chain 1, cytoplasmic	Dynll2;Dynll1	0.780157	-0.358164	0.132684	5	5	NaN	22.7386	22.9492	22.8931	22.966	23.3242	22.6355	22.0512	22.4388	23.2207	22.7341	4	4	4	57.3	57.3	57.3	10.35	0	5.6885	125740000	7	1	4	4	4	3	4	3	2	4	4	3	1	1	0	1	0	0	0	0
P01837	P01837	Ig kappa chain C region		1.80512	0.852096	0.13334	5	5	24.0757	22.7139	23.1619	24.2421	23.4081	NaN	24.2112	24.0146	24.4291	23.3156	25.8916	6	6	6	46.2	46.2	46.2	11.778	0	22.695	364980000	20	2	4	3	3	5	1	2	4	3	4	5	0	0	0	0	0	0	1	0
P06684;CON__Q1A7A4	P06684	Complement C5;Complement C5 beta chain;Complement C5 alpha chain;C5a anaphylatoxin;Complement C5 alpha chain	C5	1.96111	0.971672	0.133942	5	5	NaN	25.4211	24.4617	24.9601	26.2711	26.1872	26.2545	28.1143	26.291	25.2288	26.271	42	42	42	29.4	29.4	29.4	188.88	0	226.25	1932100000	116	0	18	13	14	24	15	15	42	30	19	26	0	0	0	0	0	1	0	0
P07309	P07309	Transthyretin	Ttr	1.56239	0.643757	0.134051	6	5	31.7258	30.0647	30.2135	31.4749	31.013	32.1034	32.1936	31.8464	31.4137	31.6411	31.6201	13	13	12	73.5	73.5	73.5	15.776	0	323.31	51220000000	122	10	12	11	10	11	7	6	11	9	10	9	0	0	0	0	0	1	0	0
Q9ES89	Q9ES89	Exostosin-like 2	Extl2	0.611998	-0.708401	0.138859	6	5	25.0262	24.2219	24.324	24.7509	24.9621	25.1577	25.1125	22.4483	23.939	24.154	24.5065	6	6	6	20.6	20.6	20.6	37.39	0	11.552	412570000	33	5	6	6	4	5	5	5	4	3	4	5	0	0	1	0	0	0	0	0
P10126;P62631	P10126;P62631	Elongation factor 1-alpha 1;Elongation factor 1-alpha 2	Eef1a1;Eef1a2	0.392565	-1.34899	0.138947	6	4	24.0893	25.2419	24.4852	21.8556	22.8741	21.7323	21.1224	23.2717	21.7369	21.9919	NaN	7	7	7	19.9	19.9	19.9	50.113	0	26.059	230070000	18	3	7	7	2	2	2	2	6	6	2	1	1	1	0	0	0	0	0	0
P13020;CON__Q3SX14	P13020	Gelsolin	Gsn	0.898013	-0.155192	0.139715	6	5	30.0495	30.1167	30.017	30.0985	29.9688	30.0712	29.7327	29.7065	30.2802	29.8783	29.8944	42	42	42	49.2	49.2	49.2	85.941	0	323.31	21344000000	306	27	38	30	30	31	26	27	36	40	38	36	1	0	0	0	0	1	0	0
Q9QUN9	Q9QUN9	Dickkopf-related protein 3	Dkk3	0.732327	-0.44944	0.143398	6	5	28.4718	28.369	28.3331	28.5978	28.5851	28.7142	28.5116	26.8813	28.1902	28.2496	28.4793	11	11	11	42.7	42.7	42.7	38.387	0	229.29	6287600000	107	10	10	10	9	9	8	10	10	9	10	9	0	0	0	0	0	1	0	0
E9Q7X6	E9Q7X6	Protein HEG homolog 1	Heg1	0.773926	-0.369733	0.144109	6	5	24.8859	24.7888	24.4927	24.574	24.9496	24.9172	24.6044	23.4733	24.5851	24.828	24.5005	9	9	9	11.3	11.3	11.3	141.9	0	46.886	467250000	40	6	8	9	7	7	7	4	7	9	8	6	0	0	1	0	0	0	0	0
Q6PHS9	Q6PHS9	Voltage-dependent calcium channel subunit alpha-2/delta-2;Voltage-dependent calcium channel subunit alpha-2-2;Voltage-dependent calcium channel subunit delta-2	Cacna2d2	0.792943	-0.334711	0.145013	6	5	24.1301	24.0201	23.8406	23.9603	24.1951	24.5961	24.3713	23.1749	23.8235	23.8789	23.6962	12	10	10	12.3	10.7	10.7	130.38	0	26.636	285940000	36	10	9	8	9	8	8	8	7	9	8	8	0	0	1	0	0	0	0	0
Q60590;Q63805	Q60590	Alpha-1-acid glycoprotein 1	Orm1	1.73401	0.79411	0.146562	6	5	25.634	24.9449	26.9342	25.1146	25.9047	26.7843	26.1511	28.1212	26.3201	26.5512	26.2575	13	13	9	43.5	43.5	27.5	23.895	0	116.77	2416200000	47	3	7	8	6	6	3	3	8	8	7	7	0	0	0	0	0	1	0	0
P33146	P33146	Cadherin-15	Cdh15	0.8271	-0.273867	0.152833	6	4	23.1009	22.7475	22.2984	22.7327	22.6285	23.1872	22.6294	NaN	22.3319	22.4996	22.5737	8	8	8	13.9	13.9	13.9	85.643	0	17.628	104980000	22	4	5	5	4	5	5	3	1	5	6	6	0	0	1	0	0	0	0	0
Q9QUH0	Q9QUH0	Glutaredoxin-1	Glrx	0.707541	-0.499115	0.15349	5	3	22.265	22.287	21.9432	22.0706	NaN	21.8986	NaN	20.8916	21.6426	22.2472	NaN	2	2	2	11.2	11.2	11.2	11.871	0	4.8388	60986000	7	2	2	2	2	1	2	1	2	2	2	1	1	0	0	0	0	0	0	0
Q91VU0	Q91VU0	Protein FAM3C	Fam3c	0.773399	-0.370716	0.153871	6	5	26.8655	26.4479	26.1356	26.2623	26.4164	26.5769	26.7466	25.2991	26.0752	26.1945	26.0848	10	10	10	44.5	44.5	44.5	24.752	0	98.5	1540000000	80	6	7	10	9	9	7	8	9	10	9	8	0	0	0	0	0	1	0	0
P07214	P07214	SPARC	Sparc	0.779159	-0.36001	0.155476	6	5	27.5092	28.2066	28.1771	28.1019	27.8422	28.3158	27.7687	26.9083	27.6314	28.1764	27.8425	12	12	12	44	44	44	34.45	0	160.66	4744500000	117	10	12	9	8	11	10	10	10	10	11	11	0	0	0	0	1	1	0	0
Q62507	Q62507	Cochlin	Coch	0.758432	-0.398907	0.15679	6	5	25.7501	26.419	26.3226	26.4885	25.502	25.5573	25.8636	25.4109	25.0341	26.0177	25.7121	9	9	9	16.3	16.3	16.3	59.949	0	52.366	1127900000	28	3	5	4	5	4	5	3	5	4	5	3	0	0	0	0	0	1	0	0
Q8BFR2;Q5STE3	Q8BFR2	Follistatin-related protein 5	Fstl5	2.48199	1.3115	0.156889	5	4	22.9307	NaN	20.5378	23.5967	24.5834	22.8043	24.156	NaN	24.9567	24.5236	23.1721	14	14	14	22	22	22	95.815	0	28.49	237010000	28	5	0	2	8	11	4	6	1	13	13	10	0	0	0	0	0	1	0	0
P51885;CON__Q05443	P51885	Lumican	Lum	0.769811	-0.377424	0.157457	6	5	25.5978	27.0265	26.7501	26.4578	26.3041	26.1246	26.1314	26.3142	25.8382	26.0039	25.7094	10	10	10	39.1	39.1	39.1	38.265	0	160.79	1563400000	65	5	8	10	7	10	8	8	10	8	9	9	0	0	0	0	1	1	0	0
Q9CR75	Q9CR75	Tumor necrosis factor receptor superfamily member 12A	Tnfrsf12a	0.677416	-0.561885	0.16046	5	4	NaN	23.4064	22.8767	23.1961	22.8442	22.385	21.3671	NaN	22.7762	22.5979	22.778	2	2	2	21.7	21.7	21.7	13.641	0	7.0778	110220000	9	1	2	2	2	2	2	2	0	2	2	2	0	0	1	0	0	0	0	0
Q80Z24	Q80Z24	Neuronal growth regulator 1	Negr1	1.33212	0.413722	0.160689	5	5	24.853	25.05	24.8529	23.8914	24.6824	NaN	25.0609	24.4948	25.0755	25.5928	25.1743	8	8	8	28.4	28.4	28.4	37.9	0	32.206	553940000	36	2	7	7	3	6	1	2	6	6	7	7	0	0	1	0	0	0	0	1
Q06890	Q06890	Clusterin;Clusterin beta chain;Clusterin alpha chain	Clu	0.849095	-0.236002	0.161083	6	5	32.2537	32.099	31.8903	32.371	32.1962	32.4434	32.125	31.4251	32.1644	32.0104	32.1399	30	30	30	49.6	49.6	49.6	51.655	0	323.31	84596000000	354	21	24	24	25	25	27	23	28	24	25	25	1	1	1	1	0	1	0	0
P31786	P31786	Acyl-CoA-binding protein	Dbi	0.699958	-0.514659	0.161758	6	5	25.1056	25.326	25.7639	24.7142	24.9356	24.9041	24.3361	23.9229	24.7299	25.7991	24.2633	5	5	5	65.5	65.5	65.5	10	0	16.278	759120000	21	2	5	4	4	3	2	4	4	5	5	5	0	0	0	0	0	0	1	0
Q63912	Q63912	Oligodendrocyte-myelin glycoprotein	Omg	0.835712	-0.258922	0.162133	6	5	25.3678	25.5668	25.5426	25.2812	25.6997	25.4323	25.3821	24.5598	25.3844	25.5455	25.2423	5	5	5	11.4	11.4	11.4	49.283	0	24.473	800600000	39	5	5	4	5	5	3	4	4	5	5	5	0	0	1	0	0	0	0	1
O08912	O08912	Polypeptide N-acetylgalactosaminyltransferase 1;Polypeptide N-acetylgalactosaminyltransferase 1 soluble form	Galnt1	1.37265	0.456962	0.163201	4	4	21.567	21.9332	NaN	21.6055	20.6799	NaN	21.8068	NaN	21.7776	22.2126	21.8165	3	3	2	7.3	7.3	5	64.254	0	8.9651	48648000	5	2	2	1	2	2	1	2	0	2	2	2	0	0	1	0	0	1	0	0
P08228	P08228	Superoxide dismutase [Cu-Zn]	Sod1	0.680414	-0.555515	0.163578	6	5	26.4704	25.7242	26.9955	26.9912	26.0092	26.2937	26.3865	24.7467	25.6686	26.4826	26.0082	8	8	8	55.2	55.2	55.2	15.942	0	40.287	1382600000	37	5	7	7	6	8	6	7	6	7	7	6	1	1	0	0	0	0	0	0
P10649;P19639;Q80W21;P48774	P10649	Glutathione S-transferase Mu 1	Gstm1	0.569445	-0.812371	0.165004	6	5	23.6058	24.6207	24.3244	22.3637	23.3576	24.0679	23.163	22.5409	22.8488	24.3409	21.6613	11	11	9	44	44	32.1	25.97	0	69.337	236240000	33	3	6	6	4	4	5	4	8	4	7	2	1	0	0	0	0	0	0	0
P02088;P02089;CON__Q3SX09;CON__P02070;P02104	P02088	Hemoglobin subunit beta-1	Hbb-b1	3.69294	1.88477	0.165467	6	5	26.257	27.5209	24.1999	30.2233	25.5435	25.2293	28.9575	31.4421	26.5302	28.1011	26.8712	15	15	15	87.8	87.8	87.8	15.84	0	323.31	15582000000	116	7	10	7	8	8	7	6	13	9	9	11	0	0	0	0	0	0	1	0
Q9R111	Q9R111	Guanine deaminase	Gda	1.33714	0.419154	0.168119	6	5	22.7693	23.303	23.1352	23.2607	23.4794	22.4709	23.7651	22.5072	23.6972	23.752	23.7232	9	9	9	22.7	22.7	22.7	51.012	0	15.184	195220000	27	2	8	8	6	7	6	8	4	9	9	8	0	0	0	0	0	0	1	0
Q6P1D5	Q6P1D5	Seizure 6-like protein	Sez6l	0.874217	-0.193937	0.169352	6	5	21.8595	21.7884	21.5266	21.739	21.9814	21.7176	21.5531	21.1565	21.6206	21.6266	21.9173	3	3	3	5.9	5.9	5.9	104.83	0	9.4984	60284000	15	2	2	2	2	2	2	2	2	3	2	2	0	0	1	0	0	0	0	0
O70624	O70624	Myocilin;Myocilin, N-terminal fragment;Myocilin, C-terminal fragment	Myoc	1.46089	0.546851	0.176083	6	5	22.4757	22.5711	23.2272	23.6698	21.8924	22.9903	23.9123	24.0937	22.9506	22.9841	22.8156	9	9	9	22.7	22.7	22.7	55.313	0	29.748	202780000	27	2	4	6	5	3	2	6	9	5	3	5	0	0	1	1	1	1	0	0
P21237	P21237	Brain-derived neurotrophic factor	Bdnf	0.659909	-0.59966	0.177662	6	5	23.037	22.96	22.2346	22.7186	23.1206	23.4621	23.2289	20.8073	22.4704	22.6584	22.4474	4	4	4	18.1	18.1	18.1	28.123	0	10.645	120770000	14	3	3	2	2	3	1	3	1	3	3	3	0	0	0	0	0	1	0	0
Q61468	Q61468	Mesothelin;Megakaryocyte-potentiating factor;Mesothelin, cleaved form	Msln	0.765841	-0.384884	0.178221	5	3	21.5242	22.256	NaN	22.4257	22.5231	22.5348	21.8773	NaN	21.8211	NaN	21.9052	4	4	4	7.2	7.2	7.2	69.422	0	5.4817	62790000	10	2	3	0	3	3	3	2	1	2	1	2	0	0	1	0	0	1	0	1
Q02819	Q02819	Nucleobindin-1	Nucb1	0.806772	-0.309767	0.17919	6	5	26.9917	26.9464	26.1227	26.7919	26.9766	27.1344	26.8584	26.0434	26.296	26.6678	26.7219	20	20	20	45.8	45.8	45.8	53.408	0	195.19	1987100000	130	13	17	18	17	16	13	12	16	18	19	18	1	0	1	0	0	1	0	0
P52430	P52430	Serum paraoxonase/arylesterase 1	Pon1	2.02851	1.02042	0.184637	6	4	24.0331	22.9592	21.6908	22.4629	23.1572	23.9043	NaN	26.0265	23.2385	23.054	23.901	10	10	10	30.1	30.1	30.1	39.565	0	28.958	384380000	22	4	5	2	4	4	3	2	9	8	6	5	0	0	0	0	0	1	0	0
Q62351	Q62351	Transferrin receptor protein 1	Tfrc	0.854351	-0.2271	0.184911	6	5	22.3956	22.095	21.775	21.9583	22.3327	21.9571	22.2603	21.5679	21.9316	21.9388	21.594	7	7	7	10.9	10.9	10.9	85.73	0	13.403	84997000	14	2	4	3	4	4	2	2	7	5	5	5	0	0	1	0	0	0	0	0
Q99LS0	Q99LS0	Augurin	Ecrg4	0.71953	-0.474873	0.186762	4	5	NaN	26.362	25.9125	NaN	25.8861	26.3436	26.1308	24.65	25.8768	26.0281	25.5703	4	4	4	20.9	20.9	20.9	16.992	0	16.349	1030900000	17	2	3	3	1	3	3	3	3	2	3	3	0	0	0	0	0	1	0	0
O54782	O54782	Epididymis-specific alpha-mannosidase	Man2b2	0.820119	-0.286096	0.186791	6	5	24.3106	23.6713	23.7975	23.8566	23.8536	24.0972	24.0221	22.9567	23.6606	23.9595	23.6262	9	9	9	12.1	12.1	12.1	115.61	0	25.274	270440000	26	4	9	8	7	5	5	6	8	8	6	5	0	0	0	0	0	1	0	0
Q61398	Q61398	Procollagen C-endopeptidase enhancer 1	Pcolce	0.736176	-0.441877	0.189415	6	5	25.9985	26.5644	27.0231	26.9213	26.5392	26.0062	26.3642	26.1071	26.7316	25.1228	26.0088	17	17	17	40	40	40	50.167	0	111.68	1658700000	88	13	15	17	15	14	13	13	12	16	9	14	0	0	0	0	0	1	0	0
Q60675	Q60675	Laminin subunit alpha-2	Lama2	0.815	-0.295127	0.190644	6	4	23.0671	23.0172	23.4605	23.4114	23.2158	22.9018	NaN	22.2524	23.21	22.9466	23.1265	8	8	8	3	3	3	343.81	0	13.175	148790000	24	3	7	7	6	6	5	1	5	5	7	7	0	0	0	0	1	1	0	0
Q8HW98	Q8HW98	IgLON family member 5	Iglon5	0.745402	-0.42391	0.191854	6	5	23.6105	23.7534	23.7573	23.3834	23.886	23.9795	23.7803	22.0696	23.375	23.6438	23.6534	5	5	5	21.7	21.7	21.7	36.766	0	15.28	216090000	19	3	3	4	3	4	3	4	4	4	4	4	0	0	0	0	0	1	0	0
O35664	O35664	Interferon alpha/beta receptor 2	Ifnar2	0.763629	-0.389055	0.192482	6	5	24.7812	24.4266	24.2142	24.5696	24.8028	24.714	23.2726	23.8665	24.3625	24.618	24.8589	5	5	5	5.1	5.1	5.1	56.578	0	12.861	420510000	22	4	5	4	3	3	3	2	5	4	3	3	0	0	1	0	0	1	0	0
O89023	O89023	Tripeptidyl-peptidase 1	Tpp1	1.16715	0.222984	0.194221	6	5	23.828	23.975	23.875	23.8667	23.7742	24.0393	23.8586	23.8171	23.8445	24.5494	24.5105	7	7	7	22.4	22.4	22.4	61.341	0	26.366	342860000	35	3	6	6	6	3	2	2	7	6	6	5	0	0	0	0	0	0	1	0
Q9EQH2	Q9EQH2	Endoplasmic reticulum aminopeptidase 1	Erap1	1.15318	0.205614	0.194494	5	4	20.6975	21.2208	20.9445	20.8946	20.8018	NaN	NaN	20.8361	21.0144	21.2872	21.332	3	3	3	4.5	4.5	4.5	106.6	0	6.7568	37343000	14	2	3	3	3	2	1	1	2	3	3	3	0	0	1	0	0	0	0	0
O88998	O88998	Noelin	Olfm1	0.83512	-0.259945	0.197085	6	5	24.1994	24.2537	24.2426	24.2164	24.54	24.6206	24.4248	23.3753	24.1507	24.1552	24.3215	5	5	5	10.9	10.9	10.9	55.397	0	11.202	355090000	31	4	4	5	4	4	3	4	4	5	5	5	0	0	0	0	0	1	0	0
Q8VIB3	Q8VIB3	Type 2 lactosamine alpha-2,3-sialyltransferase	St3gal6	0.701696	-0.511082	0.197776	3	4	NaN	20.9565	NaN	21.6715	21.7426	NaN	NaN	20.3456	21.4254	21.1479	20.8642	3	3	3	14.3	14.3	14.3	37.854	0	6.8953	37027000	10	0	3	1	3	2	1	1	3	3	2	2	0	0	1	0	0	0	0	0
Q03517	Q03517	Secretogranin-2;Secretoneurin;Manserin	Scg2	0.721227	-0.471474	0.199078	6	5	30.4707	30.4582	29.7993	30.0769	30.3598	30.5832	30.2493	28.4483	30.0081	30.2868	30.1069	33	33	33	55.9	55.9	55.9	70.643	0	323.31	21804000000	242	24	30	24	27	23	22	22	26	28	29	26	0	0	0	0	0	1	0	0
Q8VCG4	Q8VCG4	Complement component C8 gamma chain	C8g	1.48511	0.570569	0.203187	6	5	24.4366	24.8761	24.6691	25.2979	25.0614	24.612	24.6278	26.9784	25.3735	24.5925	25.4082	13	13	13	70.8	70.8	70.8	22.508	0	161.21	1078200000	49	4	10	7	8	6	4	4	13	11	7	8	0	0	0	0	0	1	0	0
Q9CQI3;Q9ERL7	Q9CQI3	Glia maturation factor beta	Gmfb	0.792445	-0.335618	0.204038	6	5	22.5823	21.7839	22.2702	21.8786	22.0009	22.1519	22.1705	21.1039	21.6124	22.3965	21.5952	4	4	4	32.4	32.4	32.4	16.723	0	17.754	74717000	17	2	4	3	3	2	4	3	4	3	3	2	0	0	0	0	0	0	1	0
B1AXV0	B1AXV0	DOMON domain-containing protein FRRS1L	Frrs1l	0.720529	-0.472871	0.204685	6	5	23.9966	23.4874	22.9478	23.3982	23.7818	24.1981	23.8228	22.1388	23.0774	23.7889	22.9827	4	4	4	13	13	13	32.506	0	16.332	204790000	29	4	4	4	3	3	3	4	3	4	4	4	0	0	1	0	0	0	0	0
P55065	P55065	Phospholipid transfer protein	Pltp	0.796541	-0.328179	0.205496	6	5	28.7127	29.3488	29.2796	29.2871	29.5555	29.2709	29.1112	28.0819	29.3596	29.206	28.8126	16	16	16	43	43	43	54.452	0	323.31	11030000000	163	10	16	15	14	12	12	12	14	14	14	16	0	0	0	0	0	1	0	0
Q62179	Q62179	Semaphorin-4B	Sema4b	0.777191	-0.363659	0.205777	6	5	23.9492	23.6953	23.3519	23.5547	23.7268	24.3582	23.7167	22.4873	23.4391	23.808	23.5941	5	5	5	6.9	6.9	6.9	91.391	0	7.2063	227910000	20	3	5	4	4	4	3	3	3	5	4	4	0	0	1	0	0	0	0	0
P16045	P16045	Galectin-1	Lgals1	0.7189	-0.476137	0.210737	6	5	25.6776	26.5829	26.3087	25.0777	25.7613	25.9993	25.3068	25.8211	25.188	26.2558	24.5539	6	6	6	57	57	57	14.866	0	192.64	1138300000	38	3	6	5	4	6	6	4	4	5	5	6	0	0	0	0	1	1	0	0
P11672	P11672	Neutrophil gelatinase-associated lipocalin	Lcn2	4.95812	2.30979	0.21202	4	5	NaN	19.4928	23.7989	20.383	20.9652	NaN	20.9337	22.2439	21.363	27.8226	24.9856	9	9	9	22	22	22	22.875	0	19.838	558070000	19	0	2	6	2	2	1	2	5	4	9	8	0	0	0	0	0	1	0	0
P16014	P16014	Secretogranin-1;CCB peptide;PE-11	Chgb	0.777303	-0.363452	0.212349	6	5	31.4511	31.5722	30.6706	31.3005	31.1725	31.2924	31.3711	29.8936	31.0907	31.0944	30.9489	43	43	43	52	52	52	77.968	0	323.31	43475000000	437	31	35	35	33	35	31	29	40	37	38	38	0	0	0	0	0	1	0	0
Q64322	Q64322	Neural proliferation differentiation and control protein 1	Npdc1	0.732829	-0.448451	0.213149	6	5	24.4143	24.5098	23.7202	24.213	24.5504	24.5686	24.318	22.5635	24.1301	24.322	24.071	7	7	7	17.5	17.5	17.5	35.719	0	26.825	344610000	36	6	6	7	7	6	5	5	4	7	7	7	0	0	1	0	0	0	0	0
P45376	P45376	Aldose reductase	Akr1b1	0.489074	-1.03188	0.21401	6	5	23.4068	24.7101	24.5446	22.8691	23.1505	24.4756	22.703	24.2952	22.6648	24.2948	20.1801	8	8	8	27.8	27.8	27.8	35.732	0	23.448	291500000	22	4	8	8	5	6	5	5	6	6	7	2	1	0	0	0	0	0	0	0
P35700	P35700	Peroxiredoxin-1	Prdx1	0.730371	-0.453299	0.215177	6	5	23.8381	24.7733	24.0016	22.964	23.5645	24.2106	23.3955	23.5015	23.0664	24.2351	22.9952	8	8	7	41.2	41.2	41.2	22.176	0	20.395	271330000	25	2	5	5	4	5	4	4	5	5	5	4	1	0	0	0	0	0	0	0
Q9JLC4	Q9JLC4	VPS10 domain-containing receptor SorCS1	Sorcs1	0.754138	-0.4071	0.21554	6	5	23.1415	23.6101	23.2751	23.6612	23.7752	23.4434	22.5723	22.0872	23.551	23.6778	23.4983	11	11	11	10.5	10.5	10.5	129.63	0	20.299	195760000	27	4	11	6	7	8	6	6	4	10	5	8	0	0	1	0	0	0	0	0
P01027	P01027	Complement C3;Complement C3 beta chain;C3-beta-c;Complement C3 alpha chain;C3a anaphylatoxin;Acylation stimulating protein;Complement C3b alpha chain;Complement C3c alpha chain fragment 1;Complement C3dg fragment;Complement C3g fragment;Complement C3d fragment;Complement C3f fragment;Complement C3c alpha chain fragment 2	C3	1.42771	0.513705	0.217258	6	5	30.449	30.1053	30.4995	30.0673	30.5969	30.3679	31.0054	32.3766	30.3091	29.9822	30.6335	114	114	100	67.8	67.8	62.8	186.48	0	323.31	41423000000	755	55	75	78	64	71	62	60	100	81	75	75	0	0	0	0	0	1	0	0
Q61592;P39655	Q61592	Growth arrest-specific protein 6	Gas6	0.802239	-0.317897	0.220199	6	5	25.849	25.2928	25.6184	25.4695	25.5228	25.8559	25.494	24.3354	25.3539	25.5369	25.6974	14	14	14	25.2	25.2	25.2	74.609	0	38.746	813100000	69	10	12	12	13	10	11	13	13	12	9	13	0	0	0	0	0	1	0	0
P05532	P05532	Mast/stem cell growth factor receptor Kit	Kit	0.843505	-0.245532	0.220498	6	3	21.5764	21.5473	21.4097	21.5095	22.1349	21.6222	21.2871	NaN	21.1896	21.6867	NaN	4	4	4	5.3	5.3	5.3	109.34	0	10.609	41151000	18	2	2	4	2	2	3	3	0	3	2	1	1	0	1	0	0	0	0	0
Q00493	Q00493	Carboxypeptidase E	Cpe	0.826238	-0.27537	0.221272	6	5	29.1671	29.5736	29.2769	28.7125	28.8953	29.5775	28.7035	28.4472	29.0668	29.2532	29.1548	29	29	29	53.2	53.2	53.2	53.255	0	316.08	10915000000	198	18	25	23	17	19	16	15	27	25	25	22	0	0	1	0	0	1	0	0
Q64726	Q64726	Zinc-alpha-2-glycoprotein	Azgp1	0.810769	-0.302638	0.222526	6	5	25.9383	25.8602	25.7238	25.9976	26.1008	26.1152	25.194	25.9812	25.6973	25.0362	26.358	16	16	16	47.9	47.9	47.9	35.332	0	141.74	1208600000	84	8	15	12	10	11	10	8	15	9	13	12	0	0	0	0	0	1	0	0
Q61220	Q61220	Protein kinase C-binding protein NELL2	Nell2	0.828237	-0.271884	0.222818	6	5	28.6596	28.56	28.3772	28.8748	28.6807	28.4479	28.7723	27.6039	28.7366	28.2886	28.2393	30	30	30	46.3	46.3	46.3	91.431	0	323.31	7244400000	242	18	22	26	21	23	22	19	28	26	27	26	0	0	0	0	0	1	0	0
Q61772;Q8BYG9	Q61772	Ephrin type-A receptor 7	Epha7	0.779044	-0.360222	0.227545	4	4	NaN	21.0231	NaN	20.9755	21.5157	21.3975	21.5467	NaN	20.6651	20.7509	20.5083	3	3	3	4.3	4.3	4.3	111.86	0	5.3655	31697000	6	1	2	1	2	2	2	2	1	3	2	2	0	0	1	0	0	0	0	0
Q60841	Q60841	Reelin	Reln	0.772079	-0.37318	0.227864	6	5	26.6523	26.2166	26.275	26.7379	26.7538	26.6205	26.7992	25.0477	26.3583	26.2073	26.435	25	25	25	8.9	8.9	8.9	387.49	0	75.223	1590900000	106	17	21	21	20	22	16	15	11	25	19	19	0	0	0	0	1	1	0	0
O09164	O09164	Extracellular superoxide dismutase [Cu-Zn]	Sod3	0.803859	-0.314986	0.228379	6	5	26.3081	25.8532	25.8896	26.2414	26.0813	26.3254	26.4111	24.8973	25.8206	26.0174	25.8612	6	6	6	33.1	33.1	33.1	27.392	0	21.124	1211900000	40	4	3	6	5	4	4	2	4	5	5	4	0	0	0	0	0	1	0	0
Q99LX0	Q99LX0	Protein deglycase DJ-1	Park7	0.769346	-0.378295	0.228391	6	5	23.2726	23.6319	23.5932	22.5363	23.1068	23.5249	22.5438	23.5218	22.7834	23.4151	22.2326	7	7	7	49.2	49.2	49.2	20.021	0	19.673	176240000	28	3	4	5	2	3	4	2	5	2	4	2	1	1	1	1	0	0	0	0
P11087;CON__Q862S4	P11087	Collagen alpha-1(I) chain	Col1a1	0.762453	-0.391279	0.23317	6	5	26.6741	26.8906	27.4035	26.5608	25.9894	26.4031	26.7507	25.4753	26.4712	25.9443	26.6699	10	10	10	6.3	6.3	6.3	138.03	0	182.72	1771900000	79	9	8	9	8	8	7	6	9	8	9	8	0	0	0	0	1	1	0	0
Q8BX43	Q8BX43	Tumor necrosis factor receptor superfamily member 19L	Relt	0.888148	-0.171128	0.233523	4	3	NaN	22.1445	21.9301	NaN	21.7777	22.1483	NaN	NaN	21.9912	21.739	21.7568	2	2	2	8.3	8.3	8.3	46.518	0.002574	3.7622	64711000	8	1	2	2	1	2	2	1	1	2	2	2	1	0	1	0	0	0	0	0
Q7TMJ8	Q7TMJ8	Phosphoinositide-3-kinase-interacting protein 1	Pik3ip1	0.740141	-0.434128	0.235577	6	5	26.5295	26.6391	26.0392	26.4195	26.2963	26.6209	26.4039	24.5861	26.1645	26.6186	26.1765	7	7	7	32.6	32.6	32.6	28.567	0	52.462	1470300000	49	4	5	5	6	4	5	6	5	5	5	5	0	0	1	0	0	0	0	0
Q61646;O55111	Q61646	Haptoglobin;Haptoglobin alpha chain;Haptoglobin beta chain	Hp	2.6712	1.41749	0.238604	6	5	26.5019	24.8806	30.7139	26.1608	29.7326	28.9282	30.3129	29.3294	29.2529	27.4836	29.8071	25	25	25	53.6	53.6	53.6	38.752	0	323.31	11804000000	120	10	7	23	10	18	15	20	23	21	17	21	0	0	0	0	0	1	0	0
Q9WUC3	Q9WUC3	Lymphocyte antigen 6H	Ly6h	0.673239	-0.57081	0.241604	6	5	27.3279	26.9681	26.2813	27.2477	27.0922	27.5616	27.1772	24.7139	26.8037	27.0135	26.8366	3	3	3	23	23	23	14.669	0	15.216	2273400000	39	3	3	3	3	3	3	3	3	3	3	3	0	0	1	0	0	0	0	1
Q8R464	Q8R464	Cell adhesion molecule 4	Cadm4	1.221	0.288061	0.244627	5	4	23.6458	23.2666	23.7933	NaN	23.4573	23.3899	23.3298	NaN	23.5101	24.0449	24.3098	4	4	4	12.6	12.6	12.6	42.723	0	18.712	202960000	18	3	4	2	1	2	2	3	1	4	3	2	0	0	1	0	0	0	0	0
P98086	P98086	Complement C1q subcomponent subunit A	C1qa	0.816956	-0.29167	0.247008	6	5	23.3863	22.7886	23.3251	23.6487	23.4224	23.7361	23.5984	22.6673	23.4749	22.6176	23.106	4	4	4	21.6	21.6	21.6	25.974	0	15.426	205970000	19	3	3	2	4	3	2	2	4	4	3	4	0	0	0	0	0	1	0	0
Q61362	Q61362	Chitinase-3-like protein 1	Chi3l1	0.769312	-0.378359	0.247368	5	3	NaN	21.0513	22.1896	21.9505	21.3426	21.7165	NaN	NaN	21.0526	21.1941	21.5685	3	3	3	11.3	11.3	11.3	43.893	0.0013004	3.8689	44565000	5	1	2	3	3	2	3	1	1	3	2	2	1	0	0	0	0	1	0	0
Q7TSG5	Q7TSG5	SH3 domain-containing protein 21	Sh3d21	0.793692	-0.333349	0.247729	5	4	31.5039	30.9566	31.6106	31.0202	31.3613	NaN	NaN	30.3416	31.1065	30.8442	31.5364	1	1	1	1.6	1.6	1.6	60.323	0	5.658	43296000000	23	1	1	1	1	1	1	1	1	1	1	1	0	0	0	0	0	0	1	0
P16092	P16092	Fibroblast growth factor receptor 1	Fgfr1	0.72126	-0.471408	0.248292	6	5	23.6903	23.9417	23.7594	23.8145	23.8948	24.2969	23.368	21.9069	24.1237	24.1494	23.593	6	6	6	8.8	8.8	8.8	91.98	0	22.012	261650000	25	3	5	4	4	3	2	3	3	3	4	3	1	1	1	0	0	0	0	0
P21460;Q8CCP0	P21460	Cystatin-C	Cst3	0.818722	-0.288554	0.249418	6	5	32.2196	32.8933	32.4715	32.7529	32.886	32.9775	32.3314	31.6167	32.7084	32.6009	32.8004	12	12	12	65.7	65.7	65.7	15.531	0	323.31	134830000000	218	11	12	12	11	10	9	8	12	11	11	11	0	0	0	0	0	1	0	0
Q04519	Q04519	Sphingomyelin phosphodiesterase	Smpd1	1.26536	0.339547	0.25087	4	4	NaN	21.1608	20.931	21.0946	NaN	21.7831	21.6925	NaN	21.0247	21.896	21.7145	2	2	2	3.2	3.2	3.2	69.926	0.0013193	3.9972	40365000	3	1	2	2	2	1	2	2	1	2	2	2	0	0	0	0	0	1	0	0
O88322	O88322	Nidogen-2	Nid2	0.828071	-0.272174	0.251697	6	5	24.0414	23.8464	23.9754	23.6078	23.5964	23.8673	24.035	22.8041	23.3797	24.0179	23.5147	8	8	8	7.3	7.3	7.3	153.91	0	22.088	235970000	47	7	8	7	7	7	7	5	4	6	8	7	0	0	0	0	1	1	0	0
P37804	P37804	Transgelin	Tagln	0.411355	-1.28154	0.252418	4	3	20.2218	24.2055	21.7473	NaN	NaN	21.5325	NaN	20.8481	NaN	20.7265	20.361	8	8	8	48.8	48.8	48.8	22.576	0	17.249	63713000	9	2	8	3	0	0	2	0	5	0	2	2	1	0	0	0	0	0	0	0
Q8BRK9	Q8BRK9	Alpha-mannosidase 2x	Man2a2	0.796646	-0.32799	0.253186	6	5	24.3265	24.2909	23.7879	24.3132	24.3809	23.7686	23.7136	22.8837	24.4082	23.9076	24.1703	16	16	16	20	20	20	130.65	0	37.878	317120000	47	8	11	13	11	11	8	8	8	14	13	13	0	0	1	0	0	0	0	0
P55288	P55288	Cadherin-11	Cdh11	0.7782	-0.361788	0.254733	5	5	NaN	22.7971	22.8383	22.7459	23.1792	23.1641	22.6035	21.5007	23.0165	22.844	22.951	8	8	8	12.7	12.7	12.7	88.111	0	12.525	126820000	21	1	5	5	6	5	5	6	5	5	6	4	0	0	1	0	0	0	0	0
Q6PE13	Q6PE13	Proline-rich transmembrane protein 3	Prrt3	0.798582	-0.324488	0.25532	6	5	25.7948	25.6713	25.0799	25.763	25.5169	25.9	25.8568	24.338	25.2851	25.4961	25.5064	5	5	5	4.9	4.9	4.9	101.22	0	14.346	877950000	31	4	4	4	4	4	4	3	4	4	4	4	0	0	1	0	0	0	0	0
Q9ER58	Q9ER58	Testican-2	Spock2	0.892333	-0.164346	0.256368	6	5	25.6554	25.8989	25.4324	25.2832	25.5227	25.8094	25.7102	25.124	25.5032	25.461	25.3815	8	8	8	27.4	27.4	27.4	46.863	0	29.787	887560000	47	3	8	7	7	5	4	3	5	7	7	7	0	0	0	0	1	1	0	0
Q8CG16;Q8CFG9;Q3UZ09	Q8CG16;Q8CFG9	Complement C1r-A subcomponent;Complement C1r-A subcomponent heavy chain;Complement C1r-A subcomponent light chain;Complement C1r-B subcomponent;Complement C1r-B subcomponent heavy chain;Complement C1r-B subcomponent light chain	C1ra;C1rb	0.88242	-0.180463	0.258739	6	5	23.3134	22.8149	23.4289	23.2671	22.7289	23.0694	23.1404	22.7285	22.816	22.8104	23.1213	7	7	7	8.9	8.9	8.9	80.072	0	13.681	171240000	23	3	6	6	5	5	4	3	5	7	6	6	0	0	0	0	0	0	1	0
Q8BPB5	Q8BPB5	EGF-containing fibulin-like extracellular matrix protein 1	Efemp1	0.852302	-0.230564	0.261758	6	5	27.0076	26.4905	26.8066	27.3806	26.4008	26.8053	26.9784	26.2441	26.5582	26.5261	26.6167	19	19	19	55	55	55	54.952	0	192.03	2057200000	94	13	16	17	18	17	15	13	16	14	16	17	0	0	0	0	1	1	0	0
Q9EPU5	Q9EPU5	Tumor necrosis factor receptor superfamily member 21	Tnfrsf21	0.923286	-0.115151	0.264733	6	4	24.0092	24.0495	24.2873	24.3254	24.3787	24.2547	24.2413	NaN	23.9836	23.974	24.2103	5	5	5	9.3	9.3	9.3	71.982	0	11.794	308380000	27	4	5	5	4	4	1	3	1	4	5	5	0	0	1	0	0	0	0	0
Q6S5C2	Q6S5C2	N-acetylglucosamine-1-phosphotransferase subunit gamma	Gnptg	1.33828	0.420382	0.264926	4	3	NaN	20.5836	21.814	21.5377	21.1587	NaN	NaN	NaN	21.5926	21.5263	21.9627	3	3	3	14.7	14.7	14.7	34.168	0	4.6271	45605000	8	1	3	3	3	3	1	1	1	3	3	2	0	0	0	0	0	1	0	0
P68372;Q9D6F9	P68372;Q9D6F9	Tubulin beta-4B chain;Tubulin beta-4A chain	Tubb4b;Tubb4a	0.525586	-0.928	0.265339	3	3	22.8413	23.6842	24.0965	NaN	NaN	NaN	NaN	23.0879	21.393	23.357	NaN	17	17	3	46.3	46.3	9.9	49.83	0	65.292	123250000	14	2	3	2	1	1	0	1	2	3	3	0	1	0	0	0	0	0	0	0
Q8R2G4	Q8R2G4	Ecto-ADP-ribosyltransferase 3	Art3	1.17031	0.226887	0.267524	6	3	22.1473	21.6926	21.6833	21.3559	22.0425	21.7901	21.9245	NaN	21.8503	22.2616	NaN	7	7	7	23.7	23.7	23.7	42.014	0	8.7851	60462000	10	2	4	3	3	4	3	2	1	5	4	1	0	0	1	0	0	0	0	1
Q8VCC9	Q8VCC9	Spondin-1	Spon1	0.89461	-0.16067	0.268816	6	5	23.2137	23.6928	23.2989	23.2617	23.5655	23.4401	23.4117	22.8301	23.5052	23.3284	23.1818	8	8	8	12.3	12.3	12.3	90.82	0	21.445	204870000	26	3	7	5	4	5	5	6	7	7	6	5	0	0	0	0	1	1	0	0
Q9R1V6	Q9R1V6	Disintegrin and metalloproteinase domain-containing protein 22	Adam22	1.30161	0.3803	0.27101	3	4	NaN	22.5937	21.8423	21.6855	NaN	NaN	NaN	21.9595	22.7651	22.4615	22.4972	3	3	3	5.1	5.1	5.1	99.714	0	6.5673	100620000	9	1	3	3	3	1	1	1	2	2	3	3	0	0	1	0	0	0	0	0
O88393	O88393	Transforming growth factor beta receptor type 3	Tgfbr3	0.811077	-0.30209	0.27306	6	5	23.4906	23.6373	23.807	23.3527	23.7305	23.7836	23.5487	22.3803	23.104	23.9034	23.721	4	4	4	4.8	4.8	4.8	93.827	0	7.9601	207050000	21	4	4	4	4	4	4	4	4	4	4	4	0	0	1	0	1	1	0	0
Q8BGX3	Q8BGX3	Leucine-rich repeat and transmembrane domain-containing protein 2	Lrtm2	0.758457	-0.39886	0.274778	6	5	23.1688	23.0777	22.8957	22.781	23.3476	23.1868	22.2672	21.4317	23.2195	23.3742	23.0944	3	3	3	10	10	10	41.038	0	10.721	146060000	16	2	3	3	3	2	2	2	2	3	3	3	0	0	1	0	0	0	0	0
Q921I1;CON__Q29443;CON__Q0IIK2	Q921I1	Serotransferrin	Tf	1.447	0.533064	0.274811	6	5	31.2026	32.1966	32.3621	31.5298	32.0114	30.0363	31.6311	33.1292	32.0069	31.7108	31.9696	63	63	59	71.4	71.4	68.3	76.723	0	323.31	92588000000	504	38	52	55	44	46	34	42	57	50	50	52	0	0	0	0	0	1	0	0
Q80YX1	Q80YX1	Tenascin	Tnc	0.861114	-0.215724	0.276095	4	3	NaN	21.2172	21.6725	21.6081	21.0676	NaN	NaN	NaN	21.1933	21.219	21.1145	3	3	3	2.1	2.1	2.1	231.8	0.0025478	3.6882	40259000	4	1	3	2	2	2	1	1	1	2	3	3	0	0	0	0	1	1	0	0
P97785	P97785	GDNF family receptor alpha-1	Gfra1	0.688753	-0.537942	0.281579	3	4	NaN	22.9957	NaN	22.9219	NaN	23.5747	23.093	21.6164	NaN	22.7195	23.0756	2	1	1	4.1	2.8	2.8	51.752	0.0025094	3.5953	119410000	13	1	1	1	1	1	1	1	1	1	1	1	0	0	1	0	0	0	0	1
P70699	P70699	Lysosomal alpha-glucosidase	Gaa	0.852148	-0.230824	0.281766	6	5	24.231	24.0846	23.8751	24.3862	24.3911	24.8754	24.2364	23.5489	24.0034	24.2157	24.3777	10	10	10	13	13	13	106.25	0	21.349	359840000	27	6	8	7	7	8	6	6	9	9	9	7	0	0	1	0	0	0	0	0
O89020	O89020	Afamin	Afm	1.36628	0.450257	0.282719	6	5	27.0072	26.4784	26.0897	26.5316	26.0458	26.6221	27.1314	28.2647	26.5714	25.8374	26.7587	19	19	19	33.1	33.1	33.1	69.378	0	323.31	2567600000	112	16	14	14	17	16	16	14	17	18	15	15	0	0	0	0	0	1	0	0
Q9DAU7	Q9DAU7	WAP four-disulfide core domain protein 2	Wfdc2	0.819824	-0.286614	0.283563	6	5	23.8506	23.609	22.915	23.2855	23.2959	23.2081	23.5575	22.2183	23.163	23.1772	23.2542	3	3	3	32.8	32.8	32.8	18.032	0	9.1497	184660000	9	2	3	3	3	2	2	3	3	3	2	3	0	0	0	0	0	1	0	0
P18242	P18242	Cathepsin D	Ctsd	1.22045	0.287416	0.28762	6	5	27.3991	27.307	27.5169	27.6531	28.0493	27.6187	28.0103	26.9631	27.8401	28.4572	28.1197	17	17	17	40.2	40.2	40.2	44.953	0	94.348	4338900000	122	12	14	13	13	13	12	10	13	15	16	17	0	0	0	0	0	1	0	0
P21956	P21956	Lactadherin	Mfge8	0.78601	-0.347381	0.289686	5	3	NaN	21.2074	21.7374	20.9419	21.4904	21.037	NaN	20.3278	NaN	21.1368	21.3418	4	4	4	9.9	9.9	9.9	51.24	0	4.9161	37701000	9	0	3	4	3	2	2	1	4	1	3	3	0	0	1	0	0	1	0	0
P97467	P97467	Peptidyl-glycine alpha-amidating monooxygenase;Peptidylglycine alpha-hydroxylating monooxygenase;Peptidyl-alpha-hydroxyglycine alpha-amidating lyase	Pam	0.811727	-0.300934	0.291006	6	5	27.6805	27.1193	26.7515	27.3289	27.2162	27.4959	27.4139	25.9888	27.1792	27.1404	27.0998	27	27	27	29.8	29.8	29.8	108.96	0	110.17	2641700000	131	21	24	21	20	25	19	14	17	23	22	22	0	0	1	0	0	0	0	0
Q8CGM1	Q8CGM1	Brain-specific angiogenesis inhibitor 2	Bai2	0.851361	-0.232157	0.293239	6	5	24.0313	24.4832	23.5779	24.1504	24.5575	24.2521	24.2474	23.3958	24.0219	24.1369	23.9141	6	6	6	3.3	3.3	3.3	169.86	0	23.227	319790000	36	5	5	4	5	4	5	6	5	6	4	6	0	0	1	0	0	0	0	0
Q8BH61	Q8BH61	Coagulation factor XIII A chain	F13a1	1.27228	0.347415	0.293861	6	5	22.0636	21.1368	21.6227	21.7543	21.3629	22.0747	21.6481	23.1231	21.7314	22.0487	21.5317	5	5	5	8.3	8.3	8.3	83.206	0	11.239	89181000	5	2	3	4	3	3	3	2	5	3	4	4	1	0	0	0	0	1	0	0
P24549;O35945;P47738	P24549	Retinal dehydrogenase 1	Aldh1a1	0.490144	-1.02872	0.29458	6	5	24.5062	27.3545	27.4969	24.2191	25.13	26.3945	24.142	25.4627	25.3056	26.7789	22.4181	24	24	23	51.7	51.7	50.1	54.467	0	97.859	1354900000	88	9	21	20	10	14	15	9	17	19	17	5	1	0	0	0	0	0	0	0
P01887	P01887	Beta-2-microglobulin	B2m	0.847698	-0.238378	0.296099	6	5	28.2021	28.5009	28.1888	28.5879	28.3071	28.2471	27.4212	27.7193	28.4937	28.3629	28.506	4	4	4	22.7	22.7	22.7	13.779	0	10.268	6757100000	45	3	4	4	2	3	4	3	4	4	3	3	0	0	0	0	0	1	0	0
Q03157	Q03157	Amyloid-like protein 1;C30	Aplp1	0.872216	-0.197243	0.298303	6	5	28.0027	28.1396	27.9516	28.2504	28.1458	28.271	27.9378	27.2201	28.2962	28.1569	28.037	20	20	20	31.5	31.5	31.5	72.75	0	221.73	5285900000	152	15	17	16	18	13	15	13	20	18	16	16	1	0	1	0	0	0	0	0
P07310	P07310	Creatine kinase M-type	Ckm	2.71254	1.43965	0.298886	6	5	22.2879	23.4975	24.0458	25.9365	21.7999	21.9056	24.876	28.7808	24.6752	23.8034	21.2905	18	18	18	57.5	57.5	57.5	43.044	0	323.31	1890800000	49	3	8	8	13	3	3	7	18	9	8	3	1	0	0	0	0	0	0	0
P05064;Q91Y97	P05064	Fructose-bisphosphate aldolase A	Aldoa	1.23065	0.299421	0.302894	6	5	26.6591	26.8078	26.8583	26.7233	26.4759	26.8166	27.1354	28.0466	26.3994	27.0517	26.4813	25	25	24	73.1	73.1	71.2	39.355	0	266.63	2925100000	111	14	20	19	18	19	15	13	22	23	20	23	1	0	0	0	0	0	0	0
P03995	P03995	Glial fibrillary acidic protein	Gfap	3.13517	1.64854	0.30358	4	4	25.2228	NaN	26.2101	21.019	NaN	26.1883	25.013	NaN	27.3565	27.9571	24.9079	19	19	16	34.9	34.9	31.2	49.899	0	87.168	1165500000	54	6	0	14	2	0	12	9	1	15	15	10	1	0	0	0	0	0	0	0
Q8BSU2	Q8BSU2	C-X-C motif chemokine 16	Cxcl16	0.676802	-0.563195	0.304113	5	4	23.9376	22.8563	23.4185	23.5295	23.5819	NaN	NaN	22.0861	21.8794	23.8093	23.8315	3	3	3	10.6	10.6	10.6	26.896	0	6.1896	188940000	16	2	3	3	3	2	1	1	3	2	3	3	0	0	1	0	0	0	0	0
P11627	P11627	Neural cell adhesion molecule L1	L1cam	0.818185	-0.2895	0.304516	6	5	23.5722	24.0965	23.6351	23.5013	23.9202	23.7704	23.6527	22.3867	23.6768	23.899	23.6838	7	7	7	6.3	6.3	6.3	140.97	0	19.948	238010000	25	4	6	6	6	7	6	4	4	5	6	7	0	0	1	0	0	0	0	0
P63101	P63101	14-3-3 protein zeta/delta	Ywhaz	0.750319	-0.414424	0.30861	6	5	24.6869	25.4466	25.3904	24.1365	24.4005	25.1469	24.4518	23.9811	24.2781	25.6958	23.861	10	8	8	39.2	31.8	31.8	27.771	0	76.516	532580000	44	6	7	7	5	7	5	4	6	6	7	5	1	0	0	0	0	0	0	0
P01942	P01942	Hemoglobin subunit alpha	Hba	2.47471	1.30726	0.309283	6	5	26.5667	28.1077	24.4824	30.4731	26.6724	25.3359	29.1686	30.9923	26.6366	27.6452	26.792	10	10	8	76.8	76.8	70.4	15.085	0	220.21	13694000000	63	5	5	4	5	6	4	5	8	5	6	5	0	0	0	0	0	0	1	0
O88342	O88342	WD repeat-containing protein 1	Wdr1	1.19689	0.259289	0.310239	5	4	21.43	21.6915	21.7823	21.2999	21.1563	NaN	NaN	21.8936	21.2392	22.2675	21.525	4	4	4	12.2	12.2	12.2	66.406	0	9.3238	56853000	8	2	4	4	3	2	1	1	2	2	4	3	1	0	0	0	0	0	0	0
Q4V9Z5;Q7TSH4;Q1EG27	Q4V9Z5	Seizure 6-like protein 2	Sez6l2	0.919066	-0.12176	0.310692	6	5	26.3555	26.2773	26.6119	26.2871	26.5191	26.7534	26.5402	26.0519	26.3672	26.4089	26.3599	13	13	13	14.4	14.4	14.4	97.503	0	105.33	1801600000	84	9	13	12	10	12	11	9	12	13	13	12	0	0	1	0	0	0	0	0
Q9R098;CON__ENSEMBL:ENSBTAP00000023055	Q9R098	Hepatocyte growth factor activator;Hepatocyte growth factor activator short chain;Hepatocyte growth factor activator long chain	Hgfac	1.45204	0.538079	0.313026	5	4	NaN	22.0766	21.6538	22.4667	23.0612	22.2683	22.4184	24.2733	22.3944	NaN	22.2875	5	5	5	13	13	13	70.567	0	27.694	147950000	16	1	3	3	3	5	2	2	4	2	1	3	0	0	0	0	0	1	0	0
Q8BHN3	Q8BHN3	Neutral alpha-glucosidase AB	Ganab	0.911952	-0.13297	0.31521	6	5	23.9405	24.3723	24.3821	24.3166	24.5381	24.6331	24.2792	23.9586	24.3361	24.2431	24.3369	15	15	15	18.2	18.2	18.2	106.91	0	56.904	393580000	55	5	14	10	11	11	8	8	9	11	13	10	0	0	0	0	0	0	1	0
Q8BK62	Q8BK62	Olfactomedin-like protein 3	Olfml3	0.690523	-0.534239	0.31618	5	3	NaN	22.961	23.1479	23.159	23.0369	21.2614	22.0515	22.246	22.2396	NaN	NaN	5	5	5	18.7	18.7	18.7	45.745	0	14.753	101740000	14	1	5	3	5	5	3	2	5	3	0	1	0	0	0	0	0	1	0	0
P13595	P13595	Neural cell adhesion molecule 1	Ncam1	0.836903	-0.256868	0.32012	6	5	28.5053	28.694	28.5124	28.4259	28.6808	28.7907	28.531	27.3042	28.5985	28.6776	28.612	23	23	23	26.1	26.1	26.1	119.43	0	179.99	7440200000	212	18	23	19	20	21	17	20	17	20	19	20	0	0	1	0	0	0	0	1
Q810U3	Q810U3	Neurofascin	Nfasc	0.845386	-0.242318	0.321835	6	5	25.0371	25.1183	24.6412	24.9593	25.2788	25.1671	25.0742	23.8737	24.9204	25.058	25.0303	15	15	15	16.1	16.1	16.1	137.97	0	63.011	587130000	73	10	15	14	12	14	9	7	8	15	15	15	0	0	1	0	0	0	0	0
Q6PB93	Q6PB93	Polypeptide N-acetylgalactosaminyltransferase 2;Polypeptide N-acetylgalactosaminyltransferase 2 soluble form	Galnt2	1.23365	0.302938	0.322504	5	4	NaN	21.4275	20.9238	21.2625	21.3009	20.8811	NaN	20.7239	21.9898	21.8666	21.2681	3	3	3	7.9	7.9	7.9	64.514	0	5.2427	47017000	8	1	2	2	3	2	2	1	2	3	2	2	0	0	1	0	0	1	0	0
P97765	P97765	WW domain-binding protein 2	Wbp2	0.87208	-0.197467	0.322568	4	4	NaN	21.6834	21.1908	21.5368	21.8357	NaN	21.1061	NaN	21.2316	21.644	21.475	2	2	2	11.1	11.1	11.1	28.032	0	6.4463	47780000	10	1	2	2	2	2	1	2	1	2	2	2	0	0	0	0	0	0	1	0
P39038	P39038	Cadherin-4	Cdh4	0.846444	-0.240513	0.323429	6	5	23.814	23.6999	23.3229	23.8642	23.8885	23.937	23.9522	22.6778	23.7199	23.394	23.8254	7	7	7	9	9	9	100.03	0	20.06	233310000	30	4	6	4	4	5	6	6	4	7	7	7	0	0	1	0	0	0	0	0
Q9JMB8	Q9JMB8	Contactin-6	Cntn6	0.840443	-0.250778	0.327657	5	4	21.6232	21.9565	21.5372	22.0016	22.2664	NaN	NaN	21.0726	21.77	22.0752	21.5871	5	5	5	4.8	4.8	4.8	113.76	0	14.136	59290000	15	2	4	4	4	4	1	0	2	3	4	4	0	0	1	0	0	0	0	1
P11276	P11276	Fibronectin;Anastellin	Fn1	0.836396	-0.257743	0.327948	6	5	27.4279	27.5478	28.187	28.3324	27.9936	27.3051	27.2142	28.0967	27.7683	27.1801	27.4469	49	49	49	30.1	30.1	30.1	272.53	0	323.31	4482500000	245	21	37	40	36	36	26	24	43	36	34	33	0	0	0	0	1	1	0	0
P22599	P22599	Alpha-1-antitrypsin 1-2	Serpina1b	1.53398	0.617277	0.329061	6	5	26.9569	26.2289	25.7219	26.4142	26.8246	27.0997	26.8027	29.4691	26.4431	25.9522	27.1244	22	5	5	43.8	9.2	9.2	45.974	0	133.97	4103500000	50	4	4	4	3	3	3	3	5	5	4	4	0	0	0	0	0	1	0	0
Q64105	Q64105	Sepiapterin reductase	Spr	0.801102	-0.319942	0.330966	4	3	21.602	21.6292	22.2393	NaN	NaN	21.9591	NaN	21.1319	21.3959	22.0847	NaN	3	3	3	17.2	17.2	17.2	27.883	0	10.224	48331000	12	2	3	2	1	1	2	1	2	3	3	0	1	0	0	0	0	0	0	0
O89051	O89051	Integral membrane protein 2B;BRI2, membrane form;BRI2 intracellular domain;BRI2C, soluble form;Bri23 peptide	Itm2b	0.775737	-0.36636	0.332419	5	5	NaN	25.8821	25.7515	26.5966	26.6405	26.8127	26.4923	24.882	26.1341	26.2767	26.0665	4	4	4	17.7	17.7	17.7	30.26	0	20.129	1258400000	31	1	4	3	3	3	3	3	3	4	4	4	0	0	1	0	0	1	0	0
P26262	P26262	Plasma kallikrein;Plasma kallikrein heavy chain;Plasma kallikrein light chain	Klkb1	1.44803	0.53409	0.334796	6	5	25.0588	24.5368	23.3431	24.4122	24.1228	23.8398	24.6722	26.6179	24.4481	23.6214	24.4054	20	20	20	40.1	40.1	40.1	71.382	0	90.391	729500000	43	8	10	7	11	5	5	6	20	13	7	12	0	0	0	0	0	1	0	0
P17182	P17182	Alpha-enolase	Eno1	0.744531	-0.425596	0.334918	6	5	26.0841	26.4238	26.7703	25.0974	25.4235	26.4893	25.6388	25.7067	25.651	26.5862	24.5296	21	21	16	62.2	62.2	45.2	47.14	0	114.5	1274100000	82	11	15	13	10	10	9	13	11	13	14	10	1	0	1	0	0	0	0	0
Q62148;Q9JHW9;Q9CZS1	Q62148	Retinal dehydrogenase 2	Aldh1a2	0.493203	-1.01975	0.338504	6	5	23.8924	26.5066	26.3893	23.6849	24.5281	25.2884	23.6693	25.0431	24.6864	26.1178	20.6261	18	17	17	40.7	39.2	39.2	56.625	0	83.181	782830000	63	5	16	15	7	11	6	5	13	14	15	3	1	0	0	0	0	0	0	0
O09010	O09010	Beta-1,3-N-acetylglucosaminyltransferase lunatic fringe	Lfng	0.834439	-0.261122	0.340155	6	5	25.5617	25.4438	25.1464	25.3747	25.0532	25.5895	25.4876	24.0897	25.0556	25.5144	25.3548	11	11	11	35.7	35.7	35.7	41.952	0	28.928	763000000	65	6	10	9	10	9	5	8	8	9	10	10	0	0	1	0	0	0	0	0
Q91XV3	Q91XV3	Brain acid soluble protein 1	Basp1	0.814317	-0.296338	0.34325	6	5	24.7141	24.1859	23.8698	24.5003	24.2633	24.6872	24.5961	22.9638	24.2299	24.2844	24.2946	6	6	6	59.7	59.7	59.7	22.086	0	22.454	341440000	30	3	5	5	4	6	6	5	4	5	6	6	0	0	1	0	0	0	0	0
Q7TQN3	Q7TQN3	WAP, Kazal, immunoglobulin, Kunitz and NTR domain-containing protein 2	Wfikkn2	1.28343	0.360001	0.343628	6	5	22.9899	22.4122	22.2978	23.0716	22.8851	23.2221	24.0203	21.8931	23.132	23.5014	23.3188	5	5	5	9.3	9.3	9.3	63.333	0	10.255	166290000	20	2	4	4	4	3	3	2	5	5	5	3	0	0	0	0	0	1	0	0
Q71M36	Q71M36	Chondroitin sulfate proteoglycan 5	Cspg5	0.904086	-0.145468	0.344498	5	4	25.2869	NaN	24.7529	25.3493	25.177	25.2081	25.2828	NaN	24.9112	24.9065	24.937	2	2	2	3.7	3.7	3.7	60.405	0	24.353	561780000	18	2	1	2	2	2	2	2	1	2	2	2	0	0	1	0	0	0	0	0
P06797	P06797	Cathepsin L1;Cathepsin L1 heavy chain;Cathepsin L1 light chain	Ctsl	1.1604	0.214627	0.345639	6	5	25.9135	26.0956	26.0455	25.896	26.09	25.6092	25.8421	25.488	26.3043	26.7415	26.4054	12	12	12	32	32	32	37.547	0	64.759	1473500000	64	7	11	11	7	11	6	8	8	10	11	10	0	0	0	0	0	0	1	0
Q64387	Q64387	Prepronociceptin;Neuropeptide 1;Nociceptin;Neuropeptide 2	Pnoc	0.819112	-0.287867	0.346397	6	5	25.337	24.9609	25.0174	25.2181	25.0917	25.5127	25.2943	23.7299	24.9048	25.372	25.2078	5	5	5	44.9	44.9	44.9	20.884	0	32.142	626610000	26	3	4	5	4	4	4	3	5	4	4	4	0	0	0	0	0	1	0	0
P63239	P63239	Neuroendocrine convertase 1	Pcsk1	0.845703	-0.241776	0.350051	6	5	24.1823	24.2602	23.7866	24.3082	24.0846	24.5758	24.5139	23.0756	24.0295	24.0119	24.1582	5	5	5	6.6	6.6	6.6	84.173	0	6.9424	313050000	18	2	4	4	3	5	4	4	3	4	4	4	0	0	0	0	0	0	1	0
P06909	P06909	Complement factor H	Cfh	1.12859	0.174516	0.351799	6	5	26.9833	26.9952	27.4319	27.9543	27.3012	27.5156	27.4535	27.4538	27.4258	27.5239	27.8335	20	20	20	18.2	18.2	18.2	139.14	0	85.464	3636700000	79	9	14	15	18	15	11	15	17	15	11	14	0	0	0	0	0	1	0	0
P10923	P10923	Osteopontin	Spp1	1.21794	0.284446	0.352513	6	5	28.3683	28.7091	28.0776	28.7487	28.0405	27.8015	29.1726	27.8506	28.4262	29.1529	28.2747	12	12	12	53.4	53.4	53.4	32.459	0	323.31	7481900000	86	6	9	10	9	9	7	6	12	11	11	8	0	0	0	0	0	1	0	0
Q8VEB4	Q8VEB4	Group XV phospholipase A2	Pla2g15	1.19152	0.252801	0.352628	5	4	NaN	22.2885	22.3951	22.723	23.0225	22.9085	22.2526	NaN	23.0955	23.1622	23.1711	3	3	3	11.2	11.2	11.2	47.307	0	22.484	113000000	13	1	2	2	3	3	3	3	0	3	3	3	0	0	1	0	0	1	0	0
P57774	P57774	Pro-neuropeptide Y;Neuropeptide Y;C-flanking peptide of NPY	Npy	1.32769	0.40892	0.352805	4	4	NaN	NaN	22.5884	23.3303	23.0743	22.1229	NaN	22.2741	23.4913	23.5538	23.4325	2	2	2	22.7	22.7	22.7	10.873	0	5.3158	147490000	10	1	1	2	2	2	2	1	2	2	2	2	0	0	0	0	0	1	0	0
Q9QZF2	Q9QZF2	Glypican-1;Secreted glypican-1	Gpc1	0.858958	-0.21934	0.35358	6	5	25.8599	25.8605	25.6144	25.8169	25.8539	26.2776	25.9094	24.7706	25.8159	25.9418	25.8683	13	13	13	33.8	33.8	33.8	61.359	0	62.846	1075200000	79	10	13	11	11	11	8	9	9	13	12	13	0	0	1	0	0	1	0	1
O08997	O08997	Copper transport protein ATOX1	Atox1	0.789826	-0.340394	0.362005	5	4	NaN	23.6042	23.5539	22.8799	23.3445	23.3242	NaN	23.0754	22.5958	23.986	22.3466	2	2	2	47.1	47.1	47.1	7.3384	0	11.336	173590000	19	1	2	2	2	2	2	1	2	2	2	2	0	0	0	0	0	0	1	0
Q60847	Q60847	Collagen alpha-1(XII) chain	Col12a1	1.12644	0.17177	0.366232	5	5	NaN	21.0548	21.3142	21.1749	20.9971	20.8946	21.71	20.8462	21.5755	21.1015	21.0613	3	3	3	1	1	1	340.21	0.0024814	3.5398	43095000	4	0	3	3	3	2	2	2	3	3	3	3	0	0	0	0	1	1	0	0
Q8CAL5	Q8CAL5	Glypican-5;Secreted glypican-5	Gpc5	0.818438	-0.289055	0.369085	6	5	21.3267	21.7862	21.6807	21.408	21.5168	22.1739	21.6673	20.2905	21.1321	21.7116	21.9967	4	4	4	9.4	9.4	9.4	63.791	0	10.975	55671000	12	2	4	3	3	2	3	2	3	3	4	2	0	0	1	0	0	1	0	1
Q8BLC3	Q8BLC3	Ly6/PLAUR domain-containing protein 1	Lypd1	0.853298	-0.228878	0.373939	5	5	22.5094	22.7864	22.2159	22.7414	22.948	NaN	22.5033	21.6147	22.4753	22.7853	22.6781	3	3	3	39	39	39	15.261	0	12.074	108380000	14	3	3	3	3	2	1	3	2	2	3	2	0	0	1	0	0	0	0	1
Q6DIB5	Q6DIB5	Multiple epidermal growth factor-like domains protein 10	Megf10	0.858206	-0.220605	0.374292	6	5	24.8807	24.3966	24.0351	24.2728	24.3001	24.7788	24.6574	23.4846	24.1004	24.3936	24.4811	8	8	8	10.1	10.1	10.1	122.97	0	23.55	382980000	34	6	6	7	6	7	8	7	7	7	7	8	0	0	1	0	0	0	0	0
Q6P9K9	Q6P9K9	Neurexin-3	Nrxn3	0.869748	-0.201331	0.374988	6	5	27.1319	27.0929	27.0893	27.231	27.2156	27.2649	27.3961	26.0486	27.107	27.1313	27.165	36	36	26	28.7	28.7	20.6	173.43	0	268.87	2619600000	153	19	21	21	20	22	16	18	17	23	22	22	0	0	1	0	0	0	0	0
P12023	P12023	Amyloid beta A4 protein;N-APP;Soluble APP-alpha;Soluble APP-beta;C99;Beta-amyloid protein 42;Beta-amyloid protein 40;C83;P3(42);P3(40);C80;Gamma-secretase C-terminal fragment 59;Gamma-secretase C-terminal fragment 57;Gamma-secretase C-terminal fragment 50;C31	App	0.895552	-0.159151	0.378638	6	5	30.0916	30.4878	30.2278	30.4265	30.3992	30.3673	30.1564	29.5585	30.6413	30.2019	30.313	27	27	25	36.6	36.6	35.5	86.721	0	323.31	26418000000	348	17	22	22	22	22	18	20	21	22	23	22	0	0	1	0	0	0	0	0
P99024	P99024	Tubulin beta-5 chain	Tubb5	0.63504	-0.65508	0.381163	5	3	21.6237	23.3762	23.709	NaN	21.6836	21.6829	NaN	21.8514	20.9732	22.4554	NaN	16	3	2	42.6	9.5	6.1	49.67	0	10.667	85130000	7	2	2	2	1	2	2	1	1	2	2	0	1	0	0	0	0	0	0	0
P28665;B2KFW1	P28665	Murinoglobulin-1	Mug1	1.43928	0.52535	0.382015	6	5	28.5983	28.397	27.7745	28.7577	28.2279	28.0798	27.6557	31.0923	28.7582	27.8951	28.7547	67	67	40	54.5	54.5	36.9	165.3	0	323.31	13845000000	290	20	28	28	26	24	14	16	35	33	25	26	0	0	0	0	0	1	0	0
P07901	P07901	Heat shock protein HSP 90-alpha	Hsp90aa1	0.790515	-0.339135	0.382843	5	4	NaN	22.3227	22.6682	21.4559	21.6517	22.3367	21.4584	21.5021	21.4101	22.6211	NaN	14	7	7	20.2	10.5	10.5	84.787	0	14.618	67076000	9	1	2	4	3	2	4	2	3	4	7	1	1	0	1	0	0	0	0	0
Q9CS84;P0DI97	Q9CS84	Neurexin-1	Nrxn1	0.837373	-0.256058	0.383346	6	5	26.2628	26.0671	26.2109	26.2807	26.4729	26.325	26.4899	24.823	26.1968	26.2174	26.342	32	29	29	26.4	24.4	24.4	166.17	0	118.64	1387400000	138	17	23	23	23	20	17	18	16	26	26	24	0	0	1	0	0	0	0	0
P16301	P16301	Phosphatidylcholine-sterol acyltransferase	Lcat	0.893541	-0.162395	0.386125	6	5	25.5157	25.0169	25.2308	25.3389	25.3152	25.6088	25.8357	24.9271	25.0911	25.0401	24.9827	8	8	8	20.1	20.1	20.1	49.746	0	43.032	767350000	54	3	8	8	8	8	7	5	7	7	8	8	0	0	0	0	0	1	0	0
Q8R555	Q8R555	Cartilage acidic protein 1	Crtac1	0.868839	-0.202839	0.387315	6	5	24.9849	24.6025	24.8549	25.0691	25.0703	25.4586	25.0919	24.0286	25.1232	24.9987	24.7771	12	12	12	21.5	21.5	21.5	70.324	0	33.219	563140000	46	6	7	7	6	8	8	6	10	10	9	11	0	0	0	0	1	1	0	0
Q8R4G6	Q8R4G6	Alpha-1,6-mannosylglycoprotein 6-beta-N-acetylglucosaminyltransferase A	Mgat5	1.14039	0.189526	0.390025	6	5	21.8823	22.3853	22.6569	22.6987	22.7074	22.2273	22.8901	22.0147	22.8297	22.5161	22.8286	6	6	6	9.5	9.5	9.5	84.55	0	8.8888	111570000	11	6	4	5	4	5	3	3	4	5	4	5	0	0	1	0	0	0	0	0
O70250	O70250	Phosphoglycerate mutase 2	Pgam2	2.42754	1.2795	0.39055	4	5	NaN	20.4548	20.0823	22.009	20.9503	NaN	21.4475	25.7116	18.5062	21.6757	23.4269	12	12	9	51.8	51.8	39.5	28.827	0	56.552	216690000	13	0	2	2	4	2	0	3	9	2	3	4	0	0	0	0	0	0	1	0
O70258	O70258	Epsilon-sarcoglycan	Sgce	0.778969	-0.360362	0.391731	5	5	22.4094	22.0436	21.6706	NaN	21.8291	22.2901	22.5129	20.3094	21.6497	21.8606	22.1085	2	2	2	4.3	4.3	4.3	49.735	0.002551	3.6946	65794000	10	2	2	2	1	2	2	2	2	2	2	2	1	0	1	0	0	0	0	0
Q99P47	Q99P47	Contactin-associated protein-like 4	Cntnap4	0.853269	-0.228928	0.393047	6	5	25.2281	24.7489	24.7817	25.1868	25.1766	25.4266	25.4478	23.9554	24.8168	25.0081	25.0845	19	19	19	16.3	16.3	16.3	144.73	0	51.303	604260000	76	12	15	14	13	14	8	13	14	15	16	15	0	0	1	0	0	0	0	0
Q6IEE6	Q6IEE6	Transmembrane protein 132E	Tmem132e	0.868903	-0.202732	0.396341	4	5	NaN	21.4337	21.366	21.7259	21.7223	NaN	21.6165	20.7491	21.8383	21.298	21.2943	5	5	5	8.1	8.1	8.1	106.99	0	9.8118	49133000	11	0	4	3	3	4	1	2	3	4	4	3	0	0	1	0	0	0	0	0
Q9D0F9	Q9D0F9	Phosphoglucomutase-1	Pgm1	0.852772	-0.229768	0.396731	6	5	23.3205	23.2117	23.482	22.9791	22.9603	23.5565	22.6007	23.9166	22.5892	23.2836	22.7194	8	8	8	18.1	18.1	18.1	61.417	0	20.18	196380000	24	3	7	8	6	6	6	5	7	6	8	5	1	0	0	0	0	0	0	0
Q6P5F6	Q6P5F6	Zinc transporter ZIP10	Slc39a10	1.30799	0.387347	0.396993	4	3	NaN	20.1405	20.5417	NaN	21.6342	20.8098	NaN	NaN	21.6168	20.9068	20.983	2	2	2	2.3	2.3	2.3	94.393	0.0043812	2.3143	30308000	5	1	2	2	1	2	2	1	1	2	2	2	0	0	1	0	0	0	0	0
P68254	P68254	14-3-3 protein theta	Ywhaq	0.646242	-0.629853	0.399725	3	4	21.3175	22.2882	22.6509	NaN	NaN	NaN	NaN	20.6738	21.1415	22.9405	21.0669	6	4	4	25.3	18	18	27.778	0	10.553	56451000	13	2	4	4	1	0	1	1	2	2	4	2	1	0	0	0	0	0	0	0
O35136	O35136	Neural cell adhesion molecule 2	Ncam2	0.823582	-0.280015	0.404284	6	5	24.6899	24.8626	24.5526	24.5617	24.5802	24.3033	24.7009	22.9664	24.5251	24.8591	24.5069	8	8	8	13.3	13.3	13.3	93.203	0	35.715	442320000	39	7	8	8	6	5	5	4	6	8	7	8	0	0	1	0	0	0	0	1
B9EKR1	B9EKR1	Receptor-type tyrosine-protein phosphatase zeta	Ptprz1	0.818123	-0.28961	0.40579	6	5	27.4929	27.2724	27.0953	27.2081	27.5614	27.7967	27.508	25.7557	27.301	27.6231	27.3865	18	18	18	9.1	9.1	9.1	254.4	0	108.01	2907100000	90	12	15	13	13	10	12	12	9	15	14	11	0	0	1	0	0	1	0	0
P29268	P29268	Connective tissue growth factor	Ctgf	0.841255	-0.249384	0.407195	6	5	25.0113	25.142	24.7003	24.5437	24.6906	24.7834	24.6722	23.5361	24.3483	25.0277	25.2281	6	6	6	21	21	21	37.824	0	13.176	512190000	36	4	6	5	4	5	5	4	4	6	5	5	0	0	0	0	1	1	0	0
O08709	O08709	Peroxiredoxin-6	Prdx6	0.784439	-0.350267	0.410796	6	5	25.6057	25.3827	26.253	24.9837	25.0971	25.6279	24.9305	24.131	25.4499	26.4446	24.7511	11	11	11	55.4	55.4	55.4	24.87	0	54.619	855220000	74	8	7	10	8	9	8	6	8	11	10	6	1	0	0	0	0	0	0	0
P70232	P70232	Neural cell adhesion molecule L1-like protein;Processed neural cell adhesion molecule L1-like protein	Chl1	0.829462	-0.269752	0.416578	6	5	26.1583	26.5865	26.1393	26.2369	26.5851	26.5255	26.4852	24.7709	26.4554	26.4686	26.3309	21	21	21	24.2	24.2	24.2	135.07	0	119.15	1521500000	85	11	19	17	14	17	15	13	11	18	19	16	0	0	1	0	1	1	0	0
P98063	P98063	Bone morphogenetic protein 1	Bmp1	0.787947	-0.34383	0.417918	4	4	NaN	23.6332	NaN	23.0784	22.8139	22.8147	NaN	21.7582	23.3387	23.0584	22.8096	2	2	2	2.7	2.7	2.7	111.67	0	14.53	139060000	17	1	2	1	2	2	2	1	2	2	2	2	0	0	0	0	1	1	0	0
P07361	P07361	Alpha-1-acid glycoprotein 2	Orm2	2.18942	1.13055	0.418255	5	5	NaN	21.9081	26.9878	22.291	26.4185	25.5076	26.9111	27.6763	23.0727	25.9932	25.1123	10	6	6	41.5	25.6	25.6	23.843	0	28.955	1386600000	18	1	2	5	2	2	2	2	5	4	4	3	0	0	0	0	0	1	0	0
A2A8L5	A2A8L5	Receptor-type tyrosine-protein phosphatase F	Ptprf	1.1386	0.18726	0.418437	4	4	22.0332	21.4624	NaN	21.2462	21.7917	NaN	22.1467	NaN	21.5313	21.8407	21.7638	5	3	3	3.4	2.2	2.2	211.49	0	6.2656	47456000	10	2	2	1	2	3	2	3	0	2	2	2	0	0	1	0	0	0	0	0
O88844;P54071	O88844	Isocitrate dehydrogenase [NADP] cytoplasmic	Idh1	0.829056	-0.270459	0.418468	6	5	22.1476	22.9298	23.0008	21.587	22.0855	22.5701	22.2979	22.2898	21.609	22.7722	21.6127	5	5	5	13.3	13.3	13.3	46.674	0	6.9942	100690000	9	3	5	5	3	4	3	3	3	4	5	3	1	0	0	0	0	0	0	0
Q61838	Q61838	Alpha-2-macroglobulin;Alpha-2-macroglobulin 165 kDa subunit;Alpha-2-macroglobulin 35 kDa subunit	A2m	1.50239	0.587258	0.41922	6	5	28.8363	28.8608	27.9018	28.0099	28.94	28.6858	27.8696	31.9781	28.619	28.2723	28.8928	63	63	62	47.9	47.9	47.4	165.85	0	323.31	21220000000	327	33	40	36	34	40	23	22	60	47	41	44	0	0	0	0	0	1	0	0
Q8C1Q4	Q8C1Q4	Meteorin	Metrn	0.895643	-0.159005	0.420172	6	5	24.9428	25.3598	24.9539	25.5574	25.4088	25.5464	25.6444	24.6663	25.1035	25.1314	25.1337	8	8	8	36.1	36.1	36.1	31.469	0	26.082	709310000	39	6	5	4	5	4	5	3	6	7	6	6	0	0	0	0	0	1	0	0
P43025	P43025	Tetranectin	Clec3b	1.1845	0.244276	0.421349	6	5	23.2183	23.484	23.7376	23.5098	23.6169	22.6259	22.9452	23.5011	24.4955	23.4695	23.6372	4	4	4	18.3	18.3	18.3	22.257	0	32.424	310780000	29	2	3	3	3	3	3	2	4	4	3	3	0	0	0	0	0	1	0	0
O88968	O88968	Transcobalamin-2	Tcn2	0.878956	-0.186138	0.423644	6	5	26.541	26.9165	26.3579	27.0433	26.7863	27.0061	26.406	25.9106	26.7028	27.1209	26.805	13	13	13	33.3	33.3	33.3	47.585	0	92.019	2055900000	75	8	11	12	11	9	8	9	13	12	10	11	0	0	0	0	0	1	0	0
Q08879;CON__ENSEMBL:ENSBTAP00000016046	Q08879	Fibulin-1	Fbln1	0.897385	-0.156201	0.426735	6	5	26.7908	26.8731	27.4532	27.6492	27.2208	26.7817	27.0202	26.6414	27.0153	26.954	27.2288	22	22	22	36.3	36.3	36.3	78.032	0	256.13	2779000000	132	11	18	18	19	14	10	12	18	18	19	18	0	0	0	0	1	1	0	0
Q9QXV0	Q9QXV0	ProSAAS;KEP;Big SAAS;Little SAAS;Big PEN-LEN;PEN;PEN-20;PEN-19;Little LEN;Big LEN	Pcsk1n	0.841501	-0.248963	0.426952	6	5	30.8022	30.7478	30.1923	30.6759	30.65	30.9325	30.8777	29.2369	30.4055	30.7545	30.8145	14	14	14	49.2	49.2	49.2	27.27	0	208.16	28923000000	136	8	13	13	12	9	12	12	13	14	14	13	0	0	0	0	0	1	0	0
Q9WUU7	Q9WUU7	Cathepsin Z	Ctsz	0.898362	-0.154631	0.427434	6	5	26.4115	26.2715	26.1424	26.3432	26.1731	26.2416	26.4085	25.4596	25.824	26.387	26.467	11	11	11	39.9	39.9	39.9	33.996	0	116.41	1463000000	70	6	6	9	10	7	8	6	10	9	9	8	0	0	0	0	0	0	1	0
Q60673	Q60673	Receptor-type tyrosine-protein phosphatase-like N	Ptprn	0.839724	-0.252014	0.430453	6	5	25.517	25.2554	24.5855	24.9003	24.9491	25.0816	25.3772	23.6783	24.7244	25.121	25.0799	8	8	8	9.1	9.1	9.1	106.08	0	33.308	587390000	38	4	8	7	5	6	6	7	4	7	8	6	0	1	1	0	0	0	0	0
Q810C1	Q810C1	SLIT and NTRK-like protein 1	Slitrk1	0.873548	-0.195041	0.43094	6	5	24.3065	24.2758	24.0579	24.3916	24.6443	24.6463	24.7321	23.3294	24.3711	24.1323	24.3951	6	6	6	9.9	9.9	9.9	77.816	0	37.344	388460000	20	3	6	6	5	4	4	3	5	6	5	5	0	0	1	0	0	0	0	0
Q91X72	Q91X72	Hemopexin	Hpx	1.28854	0.365734	0.43102	6	5	31.5647	30.78	32.67	31.2877	32.4925	32.4586	32.587	33.1765	31.5746	31.6104	32.258	38	38	38	63.3	63.3	63.3	51.317	0	323.31	95885000000	304	22	29	30	28	30	23	23	37	30	27	28	0	0	0	0	0	1	0	0
Q8R5M8	Q8R5M8	Cell adhesion molecule 1	Cadm1	0.817244	-0.29116	0.432656	6	5	24.0125	23.9945	24.0088	23.8774	24.0968	23.7849	24.1881	22.1359	23.8997	24.195	23.9379	2	2	2	4.6	4.6	4.6	49.788	0	55.935	334400000	12	2	2	2	2	2	2	2	2	2	2	2	0	0	1	0	0	0	0	0
Q91XQ5	Q91XQ5	Carbohydrate sulfotransferase 15	Chst15	0.912341	-0.132355	0.436067	6	3	21.524	21.7162	21.5017	21.4055	21.2809	21.0854	21.0769	NaN	21.5599	NaN	21.223	3	3	3	6.4	6.4	6.4	64.986	0	7.4708	42721000	11	2	3	3	3	3	2	2	1	2	1	2	0	0	1	0	0	0	0	0
Q9EPL2	Q9EPL2	Calsyntenin-1;Soluble Alc-alpha;CTF1-alpha	Clstn1	0.88331	-0.179008	0.437961	6	5	28.026	28.1012	27.577	28.0945	28.0547	28.2555	28.2647	27.0335	28.0707	28.0441	27.7827	25	25	25	28.1	28.1	28.1	108.9	0	167.94	4687400000	139	18	21	19	20	19	19	18	21	20	19	18	0	1	1	0	0	0	0	0
Q8K182	Q8K182	Complement component C8 alpha chain	C8a	1.21106	0.276265	0.438095	6	5	26.4882	25.841	25.8018	26.464	26.479	26.4122	26.4772	27.6689	26.3487	25.5493	26.5757	26	26	26	44.6	44.6	44.6	66.08	0	323.31	1994400000	110	16	20	17	19	17	14	17	24	21	16	16	0	0	1	0	0	1	0	0
Q922P8	Q922P8	Transmembrane protein 132A	Tmem132a	0.861705	-0.214734	0.439481	6	5	25.7521	25.8863	25.3107	25.8607	26.2264	26.0912	25.9596	24.6531	25.8377	25.9159	25.8329	24	24	24	27.8	27.8	27.8	110.24	0	134.09	1055000000	119	12	16	16	17	16	10	13	19	20	18	15	0	0	1	0	0	0	0	0
P12399;P12400	P12399	Protein CTLA-2-alpha	Ctla2a	1.25053	0.322536	0.441374	6	5	23.7282	23.7982	24.326	24.2806	24.1455	24.7555	24.4923	23.3026	24.2012	25.7904	24.6877	8	8	8	48.2	48.2	48.2	15.883	0	25.438	426490000	29	4	7	7	4	5	3	4	5	5	8	6	0	0	0	0	0	1	0	0
P08113	P08113	Endoplasmin	Hsp90b1	0.906079	-0.142292	0.442787	6	5	23.5358	24.2686	23.9774	24.0309	24.0922	24.1344	24.2236	23.4449	23.7912	24.192	23.6694	13	12	12	18.8	17.1	17.1	92.475	0	30.721	307610000	34	3	11	9	6	5	7	5	7	9	9	8	0	0	0	0	0	0	1	0
Q64299	Q64299	Protein NOV homolog	Nov	0.852002	-0.231071	0.443994	6	5	26.6054	26.7591	26.0018	26.5697	26.6297	26.9051	26.7827	25.239	26.5605	26.5863	26.5684	10	10	10	28.5	28.5	28.5	38.928	0	83.526	1667000000	78	9	9	9	8	10	9	7	9	9	10	9	1	0	0	0	0	1	0	0
Q9QY42	Q9QY42	Prosaposin receptor GPR37	Gpr37	0.8252	-0.277185	0.445072	4	4	NaN	23.6745	23.2115	23.8099	23.2758	NaN	NaN	22.9281	24.0132	23.3298	22.5919	4	4	4	6.7	6.7	6.7	66.775	0	13.371	200220000	19	1	4	3	3	4	1	1	3	4	4	2	0	0	1	0	0	0	0	0
Q922Q6	Q922Q6	Alpha/beta hydrolase domain-containing protein 14A	Abhd14a	1.18287	0.242291	0.454136	4	3	NaN	21.5197	21.6093	NaN	21.4591	21.5047	21.3027	NaN	NaN	21.5324	22.4614	5	5	5	29.1	29.1	29.1	27.839	0	9.2538	51776000	9	1	2	2	1	3	3	2	3	2	3	2	1	0	1	0	0	0	0	0
Q8BQB4	Q8BQB4	Four-jointed box protein 1	Fjx1	0.856701	-0.223136	0.462084	5	4	NaN	22.6999	22.9955	22.9757	23.3218	23.5905	23.422	NaN	22.9743	22.1805	22.9974	3	3	3	8.9	8.9	8.9	50.395	0	16.089	137390000	10	1	3	2	3	3	3	2	1	2	2	3	0	0	0	0	0	1	0	0
Q9R171	Q9R171	Cerebellin-1;Cerebellin;[des-Ser1]-cerebellin	Cbln1	0.855112	-0.225815	0.463064	6	5	23.6982	23.5265	22.9892	23.355	23.8308	23.9667	23.9237	22.3087	23.3547	23.6346	23.4545	4	4	3	26.4	26.4	22.3	21.113	0	7.8928	204900000	15	3	3	3	3	3	2	3	2	3	3	3	0	0	1	0	0	1	0	0
Q61839	Q61839	C-type natriuretic peptide;CNP-22;CNP-29;CNP-53	Nppc	0.84205	-0.248022	0.465852	6	5	24.7012	25.344	24.027	25.0649	24.2824	24.6114	24.9166	23.3955	24.4766	24.7196	24.6108	2	2	2	24.6	24.6	24.6	13.32	0	76.425	471580000	15	1	2	1	2	1	1	1	1	2	2	2	0	0	0	0	0	1	0	0
Q9CPW0	Q9CPW0	Contactin-associated protein-like 2	Cntnap2	0.92086	-0.118946	0.466523	5	5	21.95	22.4798	22.1598	22.2867	22.6401	NaN	22.1972	21.8302	22.4336	22.2608	22.1999	7	7	7	8.4	8.4	8.4	148.2	0	18.101	94403000	14	3	5	5	5	2	1	2	4	5	6	6	0	0	1	0	0	0	0	0
Q61730	Q61730	Interleukin-1 receptor accessory protein	Il1rap	1.20093	0.264154	0.470476	6	5	26.0686	25.7296	24.5679	25.6238	25.496	25.8553	25.7707	26.8859	25.4555	25.205	25.788	11	11	11	18.1	18.1	18.1	65.74	0	70.177	1196400000	48	7	9	9	11	8	7	7	9	10	8	11	0	0	1	0	0	1	0	0
P29699;CON__P12763	P29699	Alpha-2-HS-glycoprotein	Ahsg	1.15312	0.205538	0.474326	6	5	31.245	30.4029	30.5414	31.3408	30.8931	30.6941	30.9681	31.9875	30.7408	30.6675	30.9282	11	11	11	39.7	39.7	39.7	37.325	0	323.31	43453000000	151	10	10	11	9	10	10	11	11	10	11	11	0	0	0	0	0	1	0	0
P27773	P27773	Protein disulfide-isomerase A3	Pdia3	1.08141	0.112916	0.47696	6	4	20.7916	21.3551	21.5139	21.0896	21.4026	21.0982	NaN	21.344	21.0759	21.4048	21.4609	5	5	5	12.7	12.7	12.7	56.678	0	7.0366	46243000	7	2	3	3	3	3	2	2	3	3	4	4	0	0	0	0	0	0	1	0
Q9DBJ1	Q9DBJ1	Phosphoglycerate mutase 1	Pgam1	0.8235	-0.28016	0.477043	6	4	22.7558	23.6442	23.7663	22.591	22.8576	22.4668	22.2151	22.468	22.6109	23.6399	NaN	9	6	6	40.9	33.1	33.1	28.832	0	20.688	160530000	19	2	4	2	3	3	2	3	4	3	5	1	0	0	0	0	0	0	1	0
Q80XD8	Q80XD8	Proline-rich acidic protein 1	Prap1	0.832235	-0.264937	0.480859	6	4	23.58	23.5236	23.4565	23.4018	23.8115	24.2318	NaN	22.3954	23.3695	24.3846	23.461	5	5	5	34.2	34.2	34.2	16.798	0	17.636	234190000	23	2	4	4	4	4	2	1	5	4	5	4	0	0	0	0	0	1	0	0
Q61171	Q61171	Peroxiredoxin-2	Prdx2	1.14622	0.196883	0.486852	6	5	24.4962	25.4095	24.741	25.0575	24.6595	25.0458	25.1872	25.8096	24.7128	25.3964	24.3864	9	9	9	54.5	54.5	54.5	21.778	0	84.197	724630000	39	6	9	8	5	7	5	6	8	9	9	7	1	0	0	0	0	0	0	0
Q810U4	Q810U4	Neuronal cell adhesion molecule	Nrcam	0.810468	-0.303172	0.487318	6	5	27.9795	27.8127	27.6459	27.6708	27.7457	27.5024	27.9527	25.6037	27.744	27.8484	27.9662	20	20	20	20.9	20.9	20.9	138.52	0	97.188	3837400000	101	15	17	16	16	17	15	17	14	18	18	19	0	0	1	0	0	1	0	0
Q9R1E6	Q9R1E6	Ectonucleotide pyrophosphatase/phosphodiesterase family member 2	Enpp2	0.859274	-0.21881	0.487335	6	5	32.023	32.3757	32.7862	32.6966	31.8014	32.115	31.7074	31.2339	32.364	32.3197	32.7793	49	49	49	48.5	48.5	48.5	98.884	0	323.31	97856000000	538	34	45	42	41	36	33	33	46	47	45	46	0	0	0	0	0	1	0	0
Q7M6Z0	Q7M6Z0	Reticulon-4 receptor-like 2	Rtn4rl2	0.849569	-0.235197	0.488996	4	4	NaN	22.2198	NaN	22.7486	22.7303	23.3789	23.0888	NaN	22.384	22.5917	22.0721	6	6	6	18.6	18.6	18.6	46.075	0	14.977	87119000	17	1	4	1	4	5	4	4	1	2	5	3	0	0	1	0	0	0	0	1
P07759	P07759	Serine protease inhibitor A3K	Serpina3k	1.15384	0.206447	0.494133	6	5	30.9798	29.7744	29.7887	30.0136	30.0266	29.8328	30.4558	30.7618	29.9167	29.5932	30.6511	24	24	15	56.2	56.2	37.1	46.879	0	323.31	23440000000	225	14	15	14	15	14	13	11	12	10	12	13	0	0	0	0	0	1	0	0
P21836	P21836	Acetylcholinesterase	Ache	0.894128	-0.161447	0.494397	6	5	23.9897	23.4726	23.6236	23.7753	23.7766	23.8015	24.1148	22.6958	23.7177	23.678	23.6858	5	5	5	11.6	11.6	11.6	68.168	0	13.552	245890000	25	2	3	5	4	4	3	3	4	5	3	4	0	0	1	0	0	1	0	1
Q61247	Q61247	Alpha-2-antiplasmin	Serpinf2	1.19503	0.257043	0.494431	6	5	27.8541	27.1417	26.8276	26.9325	27.4805	27.4605	27.5437	28.7822	27.0685	26.7136	27.5913	15	15	15	30.8	30.8	30.8	54.971	0	219.05	4155500000	125	9	10	9	10	8	8	10	15	12	9	11	0	0	0	0	0	1	0	0
Q11011	Q11011	Puromycin-sensitive aminopeptidase	Npepps	0.815362	-0.294488	0.496283	5	3	21.2306	21.2968	21.504	20.4834	20.321	NaN	NaN	20.2374	20.4112	21.3694	NaN	3	3	3	4.2	4.2	4.2	103.32	0	4.7574	29491000	4	3	3	3	2	2	1	0	2	2	2	1	1	1	0	0	0	0	0	0
Q80V26	Q80V26	Inositol monophosphatase 3	Impad1	0.886199	-0.174297	0.496752	6	5	23.3962	23.7942	23.238	23.6354	23.8386	23.3299	23.5599	22.4125	23.6501	23.7246	23.4751	5	5	5	12.6	12.6	12.6	38.616	0	12.594	259700000	35	4	4	4	5	4	3	4	5	5	3	3	0	0	1	0	0	0	0	0
Q07456	Q07456	Protein AMBP;Alpha-1-microglobulin;Inter-alpha-trypsin inhibitor light chain;Trypstatin	Ambp	1.22228	0.28958	0.496888	6	5	25.5041	24.61	25.8136	25.1272	25.4766	25.4937	25.9625	27.0537	24.8658	25.0679	25.1857	9	9	9	26.1	26.1	26.1	39.029	0	97.262	1043000000	34	4	5	9	8	7	7	7	7	9	7	9	0	0	0	0	0	1	0	0
O88531	O88531	Palmitoyl-protein thioesterase 1	Ppt1	1.1137	0.155358	0.498986	6	5	23.2071	23.1454	23.1335	23.1778	22.813	23.6514	23.1193	22.684	23.4131	23.8283	23.6723	5	5	5	25.2	25.2	25.2	34.49	0	18.428	194620000	26	3	5	5	5	4	2	3	4	5	5	5	0	0	0	0	0	1	0	0
P63017;P17156	P63017	Heat shock cognate 71 kDa protein	Hspa8	0.868831	-0.202852	0.499942	6	5	25.1514	25.7928	25.7524	25.0228	24.962	25.5324	25.0812	25.4118	24.7989	26.0227	24.5161	19	17	16	38.2	36.5	34.5	70.87	0	85.37	778410000	85	12	15	13	13	11	13	11	13	13	16	12	1	1	1	0	0	0	0	0
P51910	P51910	Apolipoprotein D	Apod	0.814023	-0.296859	0.500309	6	5	28.2954	28.6545	28.583	28.9867	28.4391	28.2119	29.1575	26.563	28.1454	28.6048	28.6871	9	9	9	42.9	42.9	42.9	21.53	0	288.35	6994800000	90	7	9	9	9	9	9	8	9	9	9	8	0	0	0	0	0	1	0	0
P48036	P48036	Annexin A5	Anxa5	0.820854	-0.284802	0.502012	6	4	22.6577	23.6737	23.3381	22.339	23.3002	22.56	22.9912	21.9516	22.2042	23.6262	NaN	7	7	7	21	21	21	35.752	0	19.17	142690000	20	5	7	7	6	7	3	3	4	5	7	1	0	0	0	0	0	0	1	0
Q9DBG3;O35643	Q9DBG3	AP-2 complex subunit beta	Ap2b1	0.875947	-0.191085	0.506711	6	5	23.9165	23.4677	23.5215	23.3585	23.6364	23.6205	23.8825	22.2917	23.4045	23.8587	23.5416	8	8	8	10.6	10.6	10.6	104.58	0	14.478	208030000	21	4	8	6	5	8	7	7	4	6	7	6	0	0	1	0	0	0	0	0
P97857	P97857	A disintegrin and metalloproteinase with thrombospondin motifs 1	Adamts1	1.3382	0.420298	0.508337	6	5	24.6674	25.8591	25.1715	24.8388	24.9114	23.4375	23.3721	24.7121	25.9812	26.4734	25.6341	8	8	8	16.5	16.5	16.5	105.8	0	60.655	831840000	48	4	6	6	3	4	4	3	6	8	7	7	0	0	0	0	1	1	0	0
Q8BFR4	Q8BFR4	N-acetylglucosamine-6-sulfatase	Gns	1.14292	0.192721	0.509001	6	4	23.3382	22.9158	22.3948	22.5726	23.0318	23.7382	23.1149	NaN	22.8396	23.5714	23.2393	4	4	4	7.9	7.9	7.9	61.174	0	13.203	144860000	22	3	2	2	3	2	2	3	1	3	4	3	0	0	0	0	0	0	1	0
Q9DD06	Q9DD06	Retinoic acid receptor responder protein 2	Rarres2	0.880299	-0.183935	0.511225	6	5	22.8606	22.1987	22.9029	23.2693	22.6718	22.8998	22.8478	22.7648	23.2174	21.783	22.47	5	5	5	42	42	42	18.349	0	13.081	138960000	16	3	4	4	4	4	3	2	4	4	4	4	0	0	0	0	0	1	0	0
P15116	P15116	Cadherin-2	Cdh2	0.899562	-0.152705	0.511813	6	5	28.9963	29.3017	28.7968	28.8883	29.201	29.3502	29.191	28.0651	29.0742	29.2439	29.1075	14	14	14	16.9	16.9	16.9	99.795	0	156.76	9949000000	118	10	11	11	12	10	8	7	12	13	11	11	0	0	1	0	0	0	0	0
A2ASQ1	A2ASQ1	Agrin;Agrin N-terminal 110 kDa subunit;Agrin C-terminal 110 kDa subunit;Agrin C-terminal 90 kDa fragment;Agrin C-terminal 22 kDa fragment	Agrn	0.908931	-0.137758	0.512892	6	5	24.5615	25.1917	25.1055	25.1565	25.2991	25.3166	25.181	24.3409	24.8229	25.2188	25.2734	6	6	6	4	4	4	207.54	0	26.086	611720000	25	2	3	4	4	5	3	4	4	5	4	5	0	0	1	0	0	0	0	0
Q62361	Q62361	Pro-thyrotropin-releasing hormone;Thyrotropin-releasing hormone	Trh	1.08091	0.112248	0.514569	5	5	23.9946	23.6717	23.6693	NaN	23.5533	23.5385	24.1283	23.6412	23.6691	24.1325	23.4175	5	5	5	23.8	23.8	23.8	29.194	0	32.598	232470000	23	3	3	3	1	2	3	3	3	5	4	3	0	0	0	0	0	1	0	0
Q61703;CON__Q9TRI1	Q61703	Inter-alpha-trypsin inhibitor heavy chain H2	Itih2	1.14808	0.199218	0.51536	6	5	26.8119	26.6197	26.3392	27.1051	26.5732	26.8184	26.9853	28.039	26.5018	26.413	26.6132	19	19	19	26.6	26.6	26.6	105.93	0	159.14	2765900000	91	8	14	13	11	9	8	11	18	15	15	14	0	0	0	0	0	1	0	0
P07724;P70434	P07724	Serum albumin	Alb	0.881036	-0.182728	0.521374	6	5	35.792	35.2585	35.3556	35.8028	35.0466	35.4542	35.4374	36.1513	34.9225	34.588	35.2452	62	62	58	77.5	77.5	74.3	68.692	0	323.31	884270000000	919	40	50	50	44	42	36	36	55	51	46	42	0	0	0	0	0	1	0	0
Q09200	Q09200	Beta-1,4 N-acetylgalactosaminyltransferase 1	B4galnt1	0.879762	-0.184815	0.521961	6	4	21.7962	21.4952	21.0785	21.552	21.7802	22.3923	22.0259	NaN	21.0974	21.6231	21.2438	4	4	4	7.3	7.3	7.3	59.211	0	7.2118	51989000	13	3	4	3	3	4	3	3	1	4	4	4	0	0	1	0	0	0	0	0
P97300	P97300	Neuroplastin	Nptn	0.76085	-0.394315	0.524104	5	4	NaN	23.251	23.4392	23.0051	23.3207	23.8802	24.0086	21.1186	23.2049	23.6076	NaN	2	2	2	4.8	4.8	4.8	44.373	0	6.5635	176000000	14	1	2	2	2	2	2	2	2	2	2	1	0	0	1	0	0	0	0	0
Q99LJ1	Q99LJ1	Tissue alpha-L-fucosidase	Fuca1	1.11636	0.1588	0.524492	3	5	NaN	21.396	21.3599	21.4184	NaN	NaN	21.5859	20.9338	21.6724	22.023	21.5361	3	3	3	8.6	8.6	8.6	52.28	0	5.2173	46162000	5	0	2	2	2	1	1	2	2	2	3	2	0	0	0	0	0	0	1	0
O35516	O35516	Neurogenic locus notch homolog protein 2;Notch 2 extracellular truncation;Notch 2 intracellular domain	Notch2	1.09805	0.134947	0.525104	6	3	21.2615	21.3218	20.8279	20.6266	21.0622	21.5126	21.3658	NaN	21.1645	21.1809	NaN	2	2	2	0.8	0.8	0.8	265.33	0.0034762	2.8001	36198000	2	2	2	2	2	2	2	2	1	2	2	1	1	1	1	0	0	0	0	0
Q99J85	Q99J85	Neuronal pentraxin receptor	Nptxr	0.818194	-0.289486	0.525589	6	5	27.3798	26.563	26.3714	26.99	27.3661	27.8894	27.5378	25.297	26.8005	27.1464	27.2373	14	14	14	34.3	34.3	34.3	52.284	0	79.779	2336400000	83	10	12	10	11	12	13	13	10	13	14	11	0	0	1	0	0	0	0	0
P06330;P01757;P01756	P06330	Ig heavy chain V region AC38 205.12		1.39958	0.484992	0.525634	3	4	23.6566	NaN	NaN	24.555	23.6272	NaN	24.1424	NaN	24.2445	23.337	26.0012	3	3	3	36.4	36.4	36.4	12.934	0	29.736	302330000	8	2	1	1	2	2	1	2	1	2	2	3	0	0	0	0	0	0	1	0
Q6PCX7	Q6PCX7	Repulsive guidance molecule A	Rgma	0.887643	-0.171948	0.527529	6	5	24.7201	24.8454	24.19	24.4958	24.7324	25.0791	24.9901	23.5548	24.6219	24.6419	24.7172	10	10	10	30.8	30.8	30.8	49.675	0	41.124	470470000	38	8	10	9	8	9	5	7	7	9	9	9	0	0	1	0	0	0	0	1
Q9D1T0;Q3URE9	Q9D1T0	Leucine-rich repeat and immunoglobulin-like domain-containing nogo receptor-interacting protein 1	Lingo1	0.855636	-0.224931	0.530211	6	5	24.4441	23.9596	23.7077	24.2516	24.3759	25.0201	24.7768	22.949	23.9952	24.4183	24.202	6	6	6	14	14	14	69.1	0	28.579	352100000	40	5	5	6	6	6	5	5	5	6	6	6	0	0	1	0	0	0	0	0
Q8CG14;Q8CFG8	Q8CG14	Complement C1s-A subcomponent;Complement C1s-A subcomponent heavy chain;Complement C1s-A subcomponent light chain	C1sa	0.86312	-0.212367	0.531164	6	5	23.6269	22.567	22.9198	23.1114	22.7895	23.0938	22.3677	23.884	23.1138	22.1578	22.5052	7	7	7	14.1	14.1	14.1	76.857	0	26.857	174150000	14	2	3	3	4	4	2	3	6	6	7	4	0	0	0	0	0	0	1	0
Q8BVI4	Q8BVI4	Dihydropteridine reductase	Qdpr	0.876073	-0.190877	0.531946	5	3	22.1288	21.9671	22.328	NaN	21.7844	22.2287	NaN	NaN	21.5961	22.5995	21.4939	3	3	3	17.8	17.8	17.8	25.57	0	4.5621	57222000	4	2	3	3	1	2	3	1	0	2	3	3	0	0	0	0	0	0	1	0
Q61508	Q61508	Extracellular matrix protein 1	Ecm1	0.880335	-0.183876	0.53195	6	5	24.0912	24.7679	25.4954	25.3942	25.1828	24.7357	24.7842	24.9204	25.2862	24.2555	24.557	12	12	12	27.2	27.2	27.2	62.832	0	29.583	613820000	43	4	8	9	7	9	8	5	9	9	7	9	0	0	0	0	1	1	0	0
Q8BND5	Q8BND5	Sulfhydryl oxidase 1	Qsox1	0.924808	-0.112774	0.533192	6	5	28.3492	28.2757	28.1068	28.2732	28.0858	28.169	28.4895	27.435	28.0089	28.1671	28.3853	27	27	27	41.2	41.2	41.2	82.784	0	323.31	5652200000	169	18	23	21	19	16	13	16	25	23	21	22	0	0	1	0	0	1	0	0
Q8VCS0;CON__ENSEMBL:ENSBTAP00000016285	Q8VCS0	N-acetylmuramoyl-L-alanine amidase	Pglyrp2	1.20549	0.269618	0.533471	6	5	23.0574	21.8529	22.9333	23.1512	23.0158	23.3906	23.3475	24.4847	22.7242	22.2532	23.0394	5	5	5	12.5	12.5	12.5	57.706	0	15.414	207210000	27	4	3	3	3	3	3	2	4	5	4	4	0	0	1	0	0	1	0	0
Q8C9W3	Q8C9W3	A disintegrin and metalloproteinase with thrombospondin motifs 2	Adamts2	0.875475	-0.191861	0.535733	6	5	23.7132	23.5095	23.6757	23.5692	23.5962	23.6603	23.6971	22.1554	23.5534	24.0337	23.7044	6	6	6	7.9	7.9	7.9	135.3	0	18.333	235230000	19	3	5	2	5	4	3	3	3	6	6	3	0	0	0	0	1	1	0	0
Q61129	Q61129	Complement factor I;Complement factor I heavy chain;Complement factor I light chain	Cfi	1.16486	0.220152	0.537763	6	5	27.1348	26.7455	26.572	26.9439	26.9098	27.3153	27.4461	28.2731	26.7685	26.1246	27.1727	20	20	20	39.5	39.5	39.5	67.26	0	123.71	3086000000	109	15	11	12	15	15	14	13	17	14	13	16	0	0	0	0	0	1	0	0
P16858;Q64467	P16858	Glyceraldehyde-3-phosphate dehydrogenase	Gapdh	0.798189	-0.325197	0.542381	6	5	26.5663	27.4518	27.7031	26.6435	26.0691	27.2599	26.2919	28.0471	26.092	27.3356	25.3521	15	15	15	48	48	48	35.81	0	231.24	3068100000	105	9	13	13	12	11	8	9	14	12	12	9	1	1	0	0	0	0	0	0
O89001	O89001	Carboxypeptidase D	Cpd	0.921308	-0.118245	0.543313	6	4	21.5811	21.9367	21.359	21.4201	22.0163	21.4915	21.4535	NaN	21.1057	21.7471	21.7573	3	3	3	3.7	3.7	3.7	152.4	0.0024752	3.5339	50359000	2	3	3	3	3	3	2	2	1	2	2	3	0	0	1	0	0	0	0	0
Q923D2	Q923D2	Flavin reductase (NADPH)	Blvrb	1.35712	0.440545	0.545418	4	4	NaN	22.4389	21.0588	22.0291	21.4332	NaN	21.006	23.9009	21.7403	22.075	NaN	4	4	4	29.6	29.6	29.6	22.197	0	11.606	103430000	8	1	2	2	2	2	1	2	4	2	2	0	1	0	0	0	0	0	0	0
O89017	O89017	Legumain	Lgmn	0.911474	-0.133727	0.547188	6	5	24.2856	24.8324	24.159	24.3864	24.7489	24.4418	24.2963	23.6517	24.4987	24.8593	24.4038	7	7	7	24.8	24.8	24.8	49.372	0	26.576	453970000	38	4	6	5	5	4	4	3	7	7	6	5	0	0	0	0	0	0	1	0
O70340	O70340	Neuronal pentraxin-2	Nptx2	1.11535	0.157497	0.547412	6	4	23.7441	23.7889	23.2247	24.1002	23.8493	24.4539	24.3234	NaN	23.5086	24.143	24.0958	4	4	4	8.6	8.6	8.6	47.136	0	11.129	238840000	25	2	2	3	2	3	3	2	0	4	4	4	0	0	0	0	0	1	0	0
Q06335	Q06335	Amyloid-like protein 2	Aplp2	0.953383	-0.0688723	0.548712	6	5	26.7019	26.807	26.6943	27.1226	26.9741	26.9577	26.7174	26.569	27.0283	26.9938	26.7284	17	15	15	24.3	23.1	23.1	80.466	0	67.421	2393500000	122	12	14	14	12	12	11	10	14	15	14	11	0	1	1	0	0	0	0	0
O88307	O88307	Sortilin-related receptor	Sorl1	0.861558	-0.21498	0.549976	6	5	25.9463	26.2055	24.7306	25.8704	25.3697	26.2877	26.0891	24.662	25.3481	25.6688	25.8322	3	3	3	1.7	1.7	1.7	247.08	0	77.697	965540000	28	2	2	2	2	2	2	2	3	3	3	2	0	0	1	0	0	1	0	0
P20065	P20065	Thymosin beta-4;Hematopoietic system regulatory peptide	Tmsb4x	0.897205	-0.15649	0.55128	6	5	25.236	25.7904	25.206	24.9205	24.6671	25.2078	25.5691	24.4636	24.8916	25.4128	24.7369	5	5	5	50	50	50	5.6794	0	32.468	716260000	20	2	5	5	3	4	2	3	3	4	4	3	1	0	0	0	0	0	0	0
P12804	P12804	Fibroleukin	Fgl2	0.916524	-0.125756	0.551515	5	5	23.5933	23.805	23.6042	NaN	23.3477	23.9012	23.7234	22.9926	23.2777	24.0184	23.6106	6	6	6	17.1	17.1	17.1	48.95	0	21.814	234600000	18	2	4	2	1	3	3	3	5	4	4	4	0	0	0	0	0	1	0	0
Q3UR78	Q3UR78	Neuropeptide-like protein C4orf48 homolog	Gm1673	0.836848	-0.256962	0.553864	5	5	NaN	22.5575	24.0697	24.1032	23.6293	23.5936	23.8547	22.1545	23.6995	23.3066	23.6532	3	3	3	34.4	34.4	34.4	9.8054	0	26.39	191180000	15	1	2	3	2	3	2	3	3	2	3	3	0	0	0	0	0	1	0	0
P06151	P06151	L-lactate dehydrogenase A chain	Ldha	0.851059	-0.232669	0.554143	6	5	24.6902	25.1622	25.1675	24.1628	24.1819	25.1801	24.4174	25.4226	24.0112	25.1609	23.6118	11	10	10	29.8	26.2	26.2	36.498	0	40.101	588750000	37	5	7	8	5	6	3	4	10	7	7	4	1	0	0	0	0	0	0	0
Q9DCD0	Q9DCD0	6-phosphogluconate dehydrogenase, decarboxylating	Pgd	0.823287	-0.280532	0.555419	4	4	NaN	21.8834	22.6985	20.7639	NaN	22.1176	21.7164	22.0414	21.1268	21.4567	NaN	6	6	6	14.3	14.3	14.3	53.247	0	8.7671	64088000	9	0	4	2	4	1	3	2	5	3	4	1	1	0	0	0	0	0	0	0
Q99JA0;P70160	Q99JA0;P70160	Calcitonin gene-related peptide 1;Calcitonin	Calca	0.864956	-0.209301	0.555488	6	4	24.3538	24.948	24.3449	24.4363	24.6403	25.4352	23.7233	NaN	24.1844	25.2029	24.8245	2	2	2	24.2	24.2	24.2	14.065	0	12.346	611480000	43	2	2	2	2	2	2	1	1	2	2	2	0	0	0	0	0	1	0	0
P29788	P29788	Vitronectin	Vtn	0.923643	-0.114593	0.557062	6	5	28.3039	28.164	28.7862	28.9072	28.5575	28.0721	28.4757	28.626	28.3805	27.9079	28.3626	11	11	11	22.8	22.8	22.8	54.848	0	136.5	6982300000	91	8	10	9	9	9	9	9	11	10	10	10	0	0	0	0	0	1	0	0
Q80W93	Q80W93	Hydrocephalus-inducing protein	Hydin	0.897806	-0.155525	0.55765	4	4	26.1838	NaN	26.3146	NaN	27.1852	26.4522	NaN	26.4693	26.4653	26.0442	26.5348	2	2	2	0.5	0.5	0.5	581.52	0.002584	3.7772	1696500000	12	2	1	2	1	2	2	1	2	2	2	2	0	0	0	0	0	0	1	0
P10605	P10605	Cathepsin B;Cathepsin B light chain;Cathepsin B heavy chain	Ctsb	0.936909	-0.094019	0.559508	6	5	27.5214	27.5655	27.9717	27.8821	27.3976	27.4532	27.4438	27.2299	27.4011	27.9517	27.6632	16	16	16	49	49	49	37.279	0	167.73	3920600000	149	14	16	13	14	13	9	13	16	15	14	15	0	0	0	0	0	1	0	0
Q03137	Q03137	Ephrin type-A receptor 4	Epha4	0.89141	-0.165839	0.562911	6	5	25.3091	25.3658	25.0308	25.5416	25.56	25.4834	25.668	24.0842	25.5575	25.4746	25.2953	10	10	10	15.3	15.3	15.3	109.81	0	41.587	756740000	75	7	9	8	10	10	6	7	7	7	7	8	0	0	1	0	0	0	0	0
P09411;P09041	P09411	Phosphoglycerate kinase 1	Pgk1	0.823366	-0.280394	0.569631	6	5	25.1718	25.6453	25.8979	24.5126	24.4862	25.5254	24.632	25.9693	24.5556	25.8286	23.645	17	17	17	53.7	53.7	53.7	44.55	0	77.587	870140000	45	8	16	12	12	10	8	6	17	13	17	8	1	0	0	0	0	0	0	0
P70389	P70389	Insulin-like growth factor-binding protein complex acid labile subunit	Igfals	1.24489	0.316022	0.570974	6	5	23.173	22.2601	21.7953	22.8523	23.0902	22.2034	22.8758	24.5723	22.9398	21.2483	22.7558	9	9	9	20.1	20.1	20.1	66.959	0	54.822	194550000	22	3	3	4	6	4	2	3	9	7	2	4	0	0	0	0	0	1	0	0
Q9WTR5	Q9WTR5	Cadherin-13	Cdh13	0.897153	-0.156575	0.571312	6	5	27.0441	27.1671	27.0345	27.1237	27.3146	26.9266	26.6607	25.9495	27.2285	27.4953	27.392	6	6	6	10.5	10.5	10.5	78.185	0	100.79	2646600000	73	6	6	6	6	5	4	6	6	5	6	6	0	0	1	0	0	0	0	1
P04247	P04247	Myoglobin	Mb	1.7601	0.815657	0.571551	6	4	26.8798	23.5318	22.8198	26.1472	22.514	21.5511	24.8806	27.5874	22.4233	24.0005	NaN	11	11	11	69.5	69.5	69.5	17.069	0	189.14	1166400000	33	6	6	6	5	3	2	4	11	6	6	0	0	0	0	0	0	0	1	0
P32848	P32848	Parvalbumin alpha	Pvalb	0.803544	-0.31555	0.574147	6	5	26.9304	24.7003	25.1144	25.5036	25.0271	24.3809	25.6648	25.9761	23.998	25.0502	24.1139	5	5	5	61.8	61.8	61.8	11.93	0	34.377	858990000	24	4	4	4	4	3	3	4	5	3	4	3	0	0	0	0	0	0	1	0
O35417	O35417	Proenkephalin-B;Alpha-neoendorphin;Beta-neoendorphin;Big dynorphin;Dynorphin A(1-17);Dynorphin A(1-13);Dynorphin A(1-8);Leu-enkephalin;Rimorphin;Leumorphin	Pdyn	0.734425	-0.445312	0.574916	4	4	25.9242	25.7237	24.3577	24.6741	NaN	NaN	25.5593	23.1641	25.9802	NaN	24.1948	3	3	3	8.1	8.1	8.1	28.054	0	8.5779	560350000	14	2	3	3	3	1	1	2	2	3	0	2	0	0	0	0	0	1	0	0
P04186;CON__Q3KUS7	P04186	Complement factor B;Complement factor B Ba fragment;Complement factor B Bb fragment	Cfb	1.14263	0.192354	0.575086	6	5	28.1351	27.8704	27.9076	28.2075	28.0941	28.3773	28.2921	29.6185	27.7819	27.6093	28.1533	32	32	32	39	39	39	85.004	0	291.36	7115800000	220	20	25	28	23	23	20	20	30	26	28	26	0	0	0	0	0	1	0	0
Q9ESB3	Q9ESB3	Histidine-rich glycoprotein	Hrg	1.3119	0.391656	0.576062	6	5	25.3253	24.7827	25.5267	26.0221	26.3874	25.2617	25.5818	28.3805	26.2476	24.2335	25.2698	15	15	15	25.5	25.5	25.5	59.162	0	48.885	1950900000	52	6	7	9	7	8	8	8	14	14	8	7	0	0	0	0	0	1	0	0
P32261;CON__P41361	P32261	Antithrombin-III	Serpinc1	1.17215	0.22916	0.576897	6	5	29.1478	28.2745	28.2745	28.7126	29.0227	29.0911	28.9353	30.4143	28.579	28.0744	28.9121	27	27	27	58.9	58.9	58.9	52.003	0	323.31	11601000000	230	18	21	20	21	21	18	17	26	21	21	23	0	0	0	0	0	1	0	0
Q06770	Q06770	Corticosteroid-binding globulin	Serpina6	1.11296	0.1544	0.577071	6	5	25.9206	25.5607	25.1868	25.2514	25.7933	25.8748	26.358	26.2936	25.2183	25.2158	25.6759	9	9	9	22.2	22.2	22.2	44.769	0	44.857	1172500000	52	5	9	9	6	6	5	6	8	9	8	8	0	0	0	0	0	1	0	0
Q99JH7	Q99JH7	Calsyntenin-3	Clstn3	0.910414	-0.135406	0.578402	6	5	26.5034	26.9392	26.4222	26.6988	27.0115	27.0416	26.7064	25.8272	26.5654	26.9557	27.1155	12	12	12	14.1	14.1	14.1	105.87	0	183.54	2058800000	94	8	9	9	9	9	8	7	8	10	12	10	0	0	1	0	0	0	0	0
P98156	P98156	Very low-density lipoprotein receptor	Vldlr	1.06213	0.0869617	0.580683	4	3	NaN	21.254	21.2524	21.0297	21.2533	NaN	NaN	NaN	21.018	21.5627	21.2722	2	2	2	2.6	2.6	2.6	96.372	0.0044199	2.4237	40932000	5	1	2	2	2	2	1	1	1	2	2	2	0	0	1	0	0	0	0	0
P70274	P70274	Selenoprotein P	Sepp1	1.13606	0.184043	0.584375	6	4	23.0719	22.6831	23.0693	23.928	23.9149	23.6981	NaN	24.1966	23.62	23.384	23.1124	5	5	5	17.1	17.1	17.1	42.705	0	25.244	233970000	22	3	2	4	4	4	2	1	4	4	4	4	0	0	0	0	0	1	0	0
P11499	P11499	Heat shock protein HSP 90-beta	Hsp90ab1	0.822232	-0.282383	0.585112	6	5	21.9691	23.683	23.5615	22.4528	22.7227	22.757	22.3911	22.9661	22.2343	23.9907	21.2944	17	17	9	28.2	28.2	16.4	83.28	0	39.468	161940000	18	2	8	7	3	4	3	5	7	5	8	2	1	0	0	0	0	0	0	0
Q60963	Q60963	Platelet-activating factor acetylhydrolase	Pla2g7	0.875912	-0.191143	0.585185	6	5	27.8458	27.2984	27.5136	27.7058	27.4611	27.3843	28.0793	25.9803	27.3964	27.5304	27.732	15	15	15	40	40	40	49.258	0	120.84	3363800000	126	10	14	11	11	10	10	12	11	14	14	11	0	0	0	0	0	1	0	0
Q9R0S3	Q9R0S3	Matrix metalloproteinase-17	Mmp17	1.06369	0.089081	0.590274	6	5	22.0696	22.1776	22.3144	22.4519	22.4531	22.5319	21.9935	22.1924	22.5953	22.8631	22.4664	4	4	4	10.6	10.6	10.6	64.333	0	13.658	105420000	18	3	4	4	4	4	3	3	2	4	4	4	0	0	1	0	1	1	0	1
P52480;P53657	P52480	Pyruvate kinase PKM	Pkm	1.04556	0.0642717	0.590443	6	5	28.0574	28.4004	28.0419	28.1657	28.1811	28.3639	28.5023	28.0589	28.3953	28.3914	27.9821	32	32	32	72.9	72.9	72.9	57.844	0	323.31	6092100000	215	17	29	29	21	22	22	19	30	31	28	24	1	1	0	0	0	0	0	0
Q8BH35	Q8BH35	Complement component C8 beta chain	C8b	1.16116	0.215563	0.592082	6	5	26.8577	25.9187	25.5623	26.5372	26.1998	26.5113	26.5294	27.72	26.1894	25.4965	26.4651	22	22	22	43.3	43.3	43.3	66.229	0	210.53	2096300000	111	14	19	18	19	16	12	14	21	19	18	19	0	0	0	0	0	1	0	0
P01872	P01872	Ig mu chain C region	Ighm	1.32318	0.404005	0.593658	6	5	24.5647	23.2562	26.7898	25.8749	24.5556	23.9254	24.1108	26.8255	25.2536	24.351	25.618	14	14	14	36.6	36.6	36.6	49.971	0	235.59	1026900000	39	5	6	10	8	4	3	6	13	10	8	11	0	0	1	0	0	1	0	0
P61982	P61982	14-3-3 protein gamma;14-3-3 protein gamma, N-terminally processed	Ywhag	0.867548	-0.204984	0.594719	6	5	23.3003	23.3898	23.5858	21.9716	22.5124	23.5538	22.9206	22.4986	22.4651	23.7806	22.5716	8	6	5	29.1	21.9	17.8	28.302	0	12.256	159580000	20	3	5	5	3	3	3	3	3	5	5	5	1	0	0	0	0	0	0	0
P29533	P29533	Vascular cell adhesion protein 1	Vcam1	0.960041	-0.0588323	0.595239	6	5	24.2502	24.6222	24.5989	24.4322	24.4615	24.5142	24.2618	24.1353	24.4671	24.6355	24.6055	10	10	10	16.1	16.1	16.1	81.317	0	37.22	423100000	46	5	9	8	7	8	7	7	7	9	8	7	0	0	1	0	0	0	0	1
Q9R1Q9	Q9R1Q9	V-type proton ATPase subunit S1	Atp6ap1	0.919256	-0.121462	0.595472	6	5	28.6438	29.0172	28.843	29.1665	29.254	29.3758	29.081	28.1366	28.9853	29.1911	29.249	7	7	7	18.8	18.8	18.8	51.007	0	323.31	10023000000	90	7	7	7	7	7	7	7	6	7	7	7	0	0	1	0	0	0	0	0
P97333	P97333	Neuropilin-1	Nrp1	0.911743	-0.133302	0.595982	3	4	NaN	20.5871	NaN	21.1327	21.1387	NaN	NaN	20.8829	20.4851	20.7075	21.2026	3	3	3	4.9	4.9	4.9	103	0	4.7615	30056000	5	1	3	1	2	3	1	1	2	3	2	3	0	0	1	0	0	0	0	0
Q99PJ0	Q99PJ0	Neurotrimin	Ntm	1.1516	0.203641	0.5966	6	5	26.328	26.5806	26.319	25.8938	27.0556	25.9691	26.9014	25.1647	26.7549	27.002	26.9837	7	7	7	21.5	21.5	21.5	37.984	0	58.599	1734800000	51	7	7	7	5	5	3	6	7	6	5	6	0	0	1	0	0	0	0	1
P28654;REV__Q91VC4	P28654	Decorin	Dcn	0.966341	-0.0493957	0.597485	6	5	25.1049	25.3624	25.1634	25.0413	25.1322	25.3722	25.2055	24.9759	25.1233	25.039	25.3897	13	13	13	36.4	36.4	36.4	39.809	0	57.134	710450000	54	5	10	9	7	9	8	9	10	10	9	8	0	0	0	0	1	1	0	0
Q8CFV4	Q8CFV4	Neuritin	Nrn1	0.912825	-0.131589	0.60004	6	5	24.9237	24.5805	24.7625	25.0801	24.7272	25.4128	25.1377	23.9197	24.7979	25.0095	25.0497	4	4	4	36.6	36.6	36.6	15.353	0	22.181	556940000	20	3	4	4	4	4	3	3	4	4	4	4	0	0	1	0	0	0	0	1
P70296	P70296	Phosphatidylethanolamine-binding protein 1;Hippocampal cholinergic neurostimulating peptide	Pebp1	1.08034	0.111488	0.600366	6	5	24.6937	24.8873	25.0672	24.4475	24.7575	25.2618	25.0099	24.6707	24.8043	25.6287	24.7063	8	8	8	70.6	70.6	70.6	20.83	0	70.471	590310000	40	4	5	5	5	6	4	6	6	7	6	4	1	0	0	0	0	0	0	0
P47879	P47879	Insulin-like growth factor-binding protein 4	Igfbp4	0.91476	-0.128535	0.603296	6	5	26.5822	25.8508	25.7489	26.3953	26.1453	26.307	26.3152	25.2385	26.1214	26.1144	26.4259	9	9	9	48.4	48.4	48.4	27.807	0	42.9	1310800000	59	8	9	8	8	9	7	7	8	9	7	9	0	0	0	0	0	1	0	0
Q9JHH6	Q9JHH6	Carboxypeptidase B2	Cpb2	1.14694	0.197791	0.603697	6	5	24.58	24.4598	25.3371	24.8062	25.0276	24.5057	25.1281	26.3331	24.416	24.2594	24.7828	12	12	10	26.8	26.8	24.9	48.87	0	46.997	731340000	33	5	6	7	5	6	4	6	9	8	5	6	0	0	0	0	0	1	0	0
P19137	P19137	Laminin subunit alpha-1	Lama1	0.885281	-0.175793	0.604316	6	5	23.084	23.2099	23.2908	23.2294	23.3553	21.8381	22.9358	21.9852	23.2853	22.9705	22.9506	13	13	13	5.4	5.4	5.4	338.17	0	27.336	155840000	33	7	11	12	9	8	3	7	5	11	6	8	0	0	0	0	1	1	0	0
Q01279	Q01279	Epidermal growth factor receptor	Egfr	1.15489	0.207752	0.605636	5	5	23.3819	22.2354	22.4151	22.8746	22.7129	NaN	23.5153	23.6637	22.6785	21.8112	22.99	6	6	6	7.3	7.3	7.3	134.85	0	19.809	151350000	13	2	5	6	3	3	1	3	5	6	3	5	0	1	1	0	0	0	0	0
P17183	P17183	Gamma-enolase	Eno2	0.919383	-0.121261	0.608135	6	5	25.4027	25.1413	25.1223	24.9668	25.0237	25.2571	25.4112	24.1571	24.9594	25.5138	25.1137	16	10	10	55.5	38	38	47.296	0	77.04	672680000	70	7	9	6	7	6	7	6	9	9	9	9	1	0	1	0	0	0	0	0
Q8BLK3	Q8BLK3	Limbic system-associated membrane protein	Lsamp	0.900883	-0.150589	0.608165	6	5	26.8947	26.8676	26.7387	26.663	27.0328	27.0451	27.3665	25.5637	26.8315	26.9609	26.8927	13	13	13	41.1	41.1	41.1	38.086	0	76.476	2155000000	88	8	13	11	9	11	10	8	11	12	11	11	0	0	1	0	0	0	0	1
P11438	P11438	Lysosome-associated membrane glycoprotein 1	Lamp1	0.872337	-0.197043	0.608361	5	4	NaN	22.2706	22.7619	22.6864	22.7623	23.2135	NaN	21.5168	22.4755	23.1033	23.0719	2	2	2	5.7	5.7	5.7	43.865	0	5.5926	118230000	9	1	2	2	2	2	2	1	2	2	2	2	0	0	1	0	0	0	0	0
Q921V5	Q921V5	Alpha-1,6-mannosyl-glycoprotein 2-beta-N-acetylglucosaminyltransferase	Mgat2	0.845511	-0.242104	0.608538	5	5	NaN	22.988	22.5426	23.0911	23.2331	23.3586	23.3309	21.094	23.1847	23.3975	22.9958	6	6	6	14.3	14.3	14.3	51.029	0	16.184	136500000	30	1	4	4	6	4	3	3	3	5	3	5	0	0	1	0	0	0	0	0
Q00623;CON__P15497	Q00623	Apolipoprotein A-I;Proapolipoprotein A-I;Truncated apolipoprotein A-I	Apoa1	1.26129	0.334898	0.60934	6	5	31.4896	30.6677	29.5521	31.1228	30.7415	30.987	30.8256	33.4454	30.5799	29.7871	30.837	27	27	27	59.8	59.8	59.8	30.615	0	323.31	63653000000	265	18	20	19	19	21	20	19	26	19	17	21	0	0	0	0	0	1	0	0
Q8VHY0	Q8VHY0	Chondroitin sulfate proteoglycan 4	Cspg4	0.937469	-0.0931567	0.617701	6	5	21.7732	22.0123	21.9903	22.0763	22.2706	22.4364	22.4577	21.479	21.9009	21.9714	22.1912	7	7	7	4.4	4.4	4.4	252.31	0	13.692	77961000	14	4	5	5	6	4	3	4	2	6	6	4	0	0	1	0	0	0	0	0
Q64442	Q64442	Sorbitol dehydrogenase	Sord	0.913128	-0.131112	0.619464	5	4	NaN	21.6699	21.6528	20.9759	21.2661	22.0848	NaN	21.3478	21.3894	21.7946	21.0634	6	6	6	21.8	21.8	21.8	38.249	0	7.7039	48127000	9	0	4	4	2	3	2	1	4	3	5	2	0	0	1	1	0	0	0	0
Q91VI7	Q91VI7	Ribonuclease inhibitor	Rnh1	0.798931	-0.323858	0.621011	4	4	NaN	22.6888	22.838	NaN	21.0478	22.243	NaN	22.2535	21.0387	23.0378	21.1921	7	7	7	17.8	17.8	17.8	49.816	0	15.29	82965000	6	1	6	6	1	2	3	1	7	4	6	3	1	0	0	0	0	0	0	0
Q99PT1	Q99PT1	Rho GDP-dissociation inhibitor 1	Arhgdia	0.872557	-0.196678	0.623524	6	5	23.3017	24.2972	23.8374	23.0407	23.301	23.6768	22.3865	23.8789	23.2784	24.4566	22.8953	5	5	5	35.8	35.8	35.8	23.407	0	46.268	258240000	24	2	5	3	2	3	3	3	5	3	5	3	1	0	0	0	0	0	0	0
Q01768;P15532	Q01768;P15532	Nucleoside diphosphate kinase B;Nucleoside diphosphate kinase A	Nme2;Nme1	0.898815	-0.153904	0.626624	6	5	23.4668	24.1475	24.4363	23.6134	23.3643	24.1875	23.2336	24.106	23.3255	24.5291	23.3827	3	3	3	25	25	25	17.363	0	13.789	319010000	26	3	3	3	3	3	3	3	3	3	3	3	1	1	0	0	0	0	0	0
Q8CHP8	Q8CHP8	Phosphoglycolate phosphatase	Pgp	1.14044	0.189587	0.63137	5	3	NaN	21.0041	21.199	20.1715	20.573	20.847	NaN	NaN	20.3626	21.7038	20.7791	2	2	2	8.7	8.7	8.7	34.54	0.0034602	2.789	28106000	3	1	2	2	2	2	2	1	0	2	2	2	0	0	0	0	0	0	1	0
P17751	P17751	Triosephosphate isomerase	Tpi1	0.86192	-0.214374	0.632424	6	5	25.4022	25.5026	26.1057	24.9387	24.5154	25.5521	24.8849	26.0384	24.6566	26.0054	24.0233	15	15	15	64.2	64.2	64.2	32.191	0	106.15	894220000	79	11	11	13	10	10	9	9	13	13	10	9	0	0	0	0	0	0	1	0
P23506	P23506	Protein-L-isoaspartate(D-aspartate) O-methyltransferase	Pcmt1	0.945798	-0.0803967	0.633846	3	3	NaN	22.0915	22.0713	21.8918	NaN	NaN	NaN	NaN	21.6771	22.1687	21.9677	4	4	4	21.6	21.6	21.6	24.634	0	9.6622	50575000	13	1	4	4	3	2	0	1	1	4	3	3	1	0	0	0	0	0	0	0
P11680	P11680	Properdin	Cfp	1.08866	0.12255	0.634116	6	5	23.0469	22.3774	22.9962	23.4974	23.179	23.1392	23.0704	23.4333	22.9903	22.5542	23.7613	5	5	5	14.7	14.7	14.7	50.327	0	11.713	171730000	14	4	2	5	4	3	2	2	4	4	4	5	0	0	0	0	0	1	0	0
Q8R1U2	Q8R1U2	Cell growth regulator with EF hand domain protein 1	Cgref1	0.901368	-0.149811	0.636705	6	5	24.9752	25.5707	24.8508	24.9774	25.0462	25.1517	25.301	23.7011	25.4166	25.1888	25.1202	7	7	7	28.5	28.5	28.5	30.847	0	84.951	654900000	40	5	6	6	5	6	5	5	6	7	7	7	0	0	0	0	0	1	0	0
Q3U1J4	Q3U1J4	DNA damage-binding protein 1	Ddb1	1.06921	0.096549	0.641892	5	4	21.0697	21.5346	21.3605	21.3061	21.5825	NaN	NaN	20.904	21.7615	21.6634	21.54	3	3	3	4.9	4.9	4.9	126.85	0	4.2073	48634000	6	2	3	2	2	3	1	0	3	3	2	2	1	1	0	0	0	0	0	0
P50396	P50396	Rab GDP dissociation inhibitor alpha	Gdi1	0.922039	-0.117101	0.643125	6	5	23.1967	23.9939	23.5752	23.2388	23.1715	23.8505	23.4237	22.9584	23.4762	24.08	22.9983	11	11	9	34.5	34.5	27.7	50.521	0	24.451	231830000	40	5	7	7	6	5	5	6	7	8	8	7	1	0	0	0	0	0	0	0
Q80ZF8	Q80ZF8	Brain-specific angiogenesis inhibitor 3	Bai3	1.0819	0.113571	0.649902	4	5	21.3756	20.7859	NaN	20.9121	21.2477	NaN	21.0977	20.5257	21.4245	21.3854	21.5362	3	3	3	2	2	2	171.31	0	6.3119	37610000	13	3	3	1	3	3	1	3	2	3	3	3	0	0	1	0	0	0	0	0
O35988	O35988	Syndecan-4	Sdc4	0.884657	-0.17681	0.650878	6	4	21.8091	22.6865	21.6887	21.7402	21.6889	23.1451	22.1817	NaN	21.492	22.5335	21.5912	3	3	3	15.2	15.2	15.2	21.482	0.0025	3.5714	74491000	4	2	3	3	2	2	3	3	1	3	3	3	0	0	1	0	0	1	0	0
O35464	O35464	Semaphorin-6A	Sema6a	0.88369	-0.178387	0.653739	3	5	21.5759	21.5913	NaN	NaN	NaN	22.1906	21.914	20.623	21.5305	21.921	22.0493	2	2	2	2.1	2.1	2.1	114.43	0.0035336	2.9465	53267000	10	2	2	1	1	1	2	2	2	2	2	2	0	0	1	0	0	0	0	0
Q9QXC1	Q9QXC1	Fetuin-B	Fetub	1.08314	0.11522	0.654041	6	5	27.211	27.281	27.2502	27.5459	27.2391	27.366	27.1335	28.4812	27.2194	26.9925	27.3271	12	12	12	34.8	34.8	34.8	42.712	0	170.1	4015300000	63	6	9	7	8	9	8	6	11	9	9	7	0	0	0	0	0	1	0	0
Q7TSK3	Q7TSK3	Protocadherin-8	Pcdh8	0.930953	-0.103219	0.654942	6	4	22.9357	22.2656	21.6326	22.2553	22.3626	22.5549	22.3335	NaN	22.0823	22.282	22.2271	4	4	4	6	6	6	113.26	0	11.167	81793000	18	2	4	4	3	4	3	4	0	4	4	4	0	0	1	0	0	0	0	0
Q6PDJ1	Q6PDJ1	VWFA and cache domain-containing protein 1	Cachd1	1.09031	0.124742	0.656959	4	5	NaN	21.335	21.4875	21.6854	21.9508	NaN	22.1187	20.9367	21.6803	22.0323	21.9291	4	4	4	3.3	3.3	3.3	143.81	0	7.2649	56341000	9	1	4	2	2	3	0	2	2	3	3	3	0	0	1	0	0	0	0	0
P15626	P15626	Glutathione S-transferase Mu 2	Gstm2	0.812531	-0.299505	0.65711	4	3	NaN	22.3697	21.8802	NaN	20.5165	21.0973	NaN	20.6971	20.6589	22.1433	NaN	6	4	4	38.1	26.1	26.1	25.716	0	8.6279	41454000	8	1	3	3	1	2	2	1	3	4	4	0	1	0	0	0	0	0	0	0
Q8R4G0	Q8R4G0	Netrin-G1	Ntng1	0.920905	-0.118876	0.660465	6	5	22.9322	22.4688	22.7503	22.9211	23.0544	23.5655	23.5385	22.1897	22.6185	22.739	23.0635	5	5	5	10.6	10.6	10.6	60.565	0	14.288	151330000	31	4	4	4	4	4	3	4	4	5	5	4	0	0	1	0	0	0	0	1
Q91V41	Q91V41	Ras-related protein Rab-14	Rab14	0.935398	-0.0963483	0.662515	6	4	21.6765	21.6785	21.5916	21.6666	21.7593	21.6436	NaN	20.8235	21.5893	22.0452	21.8341	3	3	3	19.1	19.1	19.1	23.897	0	5.292	58591000	8	2	3	2	2	3	2	1	2	3	2	2	0	0	1	0	0	0	0	0
Q9D7I0	Q9D7I0	Protein shisa-5	Shisa5	0.866017	-0.207533	0.663573	5	3	NaN	21.8423	22.7615	23.4738	23.0607	22.2981	22.1018	22.1819	NaN	23.1556	NaN	3	3	3	13.6	13.6	13.6	25.517	0	13.584	109820000	14	1	3	2	3	3	2	2	2	1	3	1	0	1	1	0	0	0	0	0
Q61702;CON__Q0VCM5	Q61702	Inter-alpha-trypsin inhibitor heavy chain H1	Itih1	1.16513	0.220497	0.667596	6	5	25.8211	24.7334	24.6208	25.2272	25.5225	25.5241	25.4631	27.2705	25.0828	24.2567	25.237	28	28	28	40	40	40	101.07	0	234.9	1226100000	107	13	18	15	14	15	12	13	28	17	14	15	0	0	0	0	0	1	0	0
Q6PHU5	Q6PHU5	Sortilin	Sort1	0.911374	-0.133885	0.674483	4	5	NaN	22.028	22.0911	21.931	22.0317	NaN	22.0809	20.832	22.1237	22.3378	22.0583	4	4	4	6.8	6.8	6.8	91.199	0	6.2408	68807000	9	1	4	4	3	3	1	3	2	4	4	4	0	1	1	0	0	0	0	0
Q9Z0J0	Q9Z0J0	Epididymal secretory protein E1	Npc2	1.07164	0.0998175	0.675533	4	4	NaN	23.3527	23.1446	NaN	23.507	23.4129	23.5157	NaN	22.9229	23.4139	23.964	3	3	3	21.5	21.5	21.5	16.442	0	5.8765	157680000	10	1	2	2	1	3	2	2	1	3	3	3	0	0	0	0	0	1	0	0
Q9ESY9	Q9ESY9	Gamma-interferon-inducible lysosomal thiol reductase	Ifi30	0.964577	-0.052032	0.677857	5	5	NaN	21.5811	21.7704	21.9473	21.7225	21.9825	21.8593	21.7319	21.3914	21.9386	21.8223	3	3	3	10.9	10.9	10.9	27.784	0	6.1901	60093000	11	0	3	3	3	3	2	2	2	2	3	3	0	0	0	0	0	1	0	0
Q5F226	Q5F226	Protocadherin Fat 2	Fat2	0.951802	-0.0712667	0.678694	6	4	21.8504	22.1355	21.821	21.6233	22.4109	21.6657	21.6834	NaN	21.7917	22.0552	21.8559	6	6	6	1.8	1.8	1.8	480.1	0	8.4627	65754000	11	2	6	5	4	4	3	3	1	6	5	4	0	1	1	0	0	0	0	0
P33622	P33622	Apolipoprotein C-III	Apoc3	1.20258	0.266127	0.679002	6	5	25.2401	24.5514	23.3576	24.8048	25.2474	24.6729	23.6683	27.1776	24.5711	24.3835	24.7586	3	3	3	42.4	42.4	42.4	10.982	0	178.6	920780000	12	2	2	2	2	2	1	2	3	2	3	2	0	0	0	0	0	1	0	0
Q9R0P3	Q9R0P3	S-formylglutathione hydrolase	Esd	1.15057	0.202352	0.679474	4	4	NaN	22.1162	21.7639	20.5853	21.839	NaN	21.4793	22.2901	21.0175	22.3269	NaN	3	3	3	17.7	17.7	17.7	31.319	0	9.8528	61205000	7	1	3	2	2	2	0	2	3	3	3	1	1	0	0	0	0	0	0	0
Q8QZR4	Q8QZR4	Out at first protein homolog	Oaf	0.926153	-0.110678	0.679574	5	4	22.4398	22.68	22.0731	NaN	23.0307	23.0999	22.5136	NaN	22.7621	22.1211	22.8193	4	4	4	16	16	16	31.524	0	11.922	92989000	14	2	3	3	0	2	3	3	1	3	3	2	0	0	0	0	0	0	1	0
Q9JHJ8	Q9JHJ8	ICOS ligand	Icoslg	1.06447	0.090142	0.68068	5	5	NaN	21.9876	22.1503	21.6962	22.2649	22.0485	21.8553	21.5256	22.2468	22.5176	22.4529	3	3	3	10.2	10.2	10.2	35.96	0	14.763	76364000	21	1	3	3	3	3	3	3	3	3	3	3	0	0	1	0	0	0	0	0
B0V2N1	B0V2N1	Receptor-type tyrosine-protein phosphatase S	Ptprs	0.952263	-0.0705687	0.686783	5	3	21.9979	21.7476	21.3554	21.9449	21.9465	NaN	NaN	NaN	21.8667	21.6298	21.6872	3	3	3	2.1	2.1	2.1	211.9	0	10.799	53679000	14	2	2	3	3	2	0	1	1	2	2	2	0	0	1	0	0	0	0	0
P05063	P05063	Fructose-bisphosphate aldolase C	Aldoc	0.862411	-0.213553	0.689275	6	5	23.7111	23.8851	24.7181	23.7703	23.61	23.5745	23.5516	21.8404	24.2699	25.0585	23.6029	12	11	11	40.2	38.3	38.3	39.394	0	58.309	300800000	43	7	8	10	10	7	4	5	3	10	9	7	0	0	0	0	0	0	1	0
Q8BTG7	Q8BTG7	Protein NDRG4	Ndrg4	1.06533	0.091296	0.691155	5	5	24.064	23.5304	23.0505	23.7471	23.7629	NaN	24.1758	23.2838	23.8283	23.6689	23.6547	4	4	4	18.2	18.2	18.2	38.508	0	11.123	239540000	16	2	3	3	4	3	1	2	2	4	4	4	1	0	0	0	0	0	0	0
P01831	P01831	Thy-1 membrane glycoprotein	Thy1	1.08498	0.117665	0.694693	6	5	27.0652	26.4382	26.6615	26.3787	27.023	27.5999	27.3258	26.2055	26.8627	27.0005	27.4993	6	6	6	33.3	33.3	33.3	18.08	0	259.14	2338100000	59	5	5	6	5	4	3	4	6	6	6	6	0	0	1	0	0	0	0	1
P97798	P97798	Neogenin	Neo1	1.07816	0.108573	0.694918	6	5	24.2365	23.9799	23.2251	23.65	23.7928	23.4832	24.419	22.9896	24.0231	23.9853	23.7655	10	10	10	9.3	9.3	9.3	163.16	0	24.621	272070000	29	4	10	6	6	5	2	5	7	9	8	6	0	0	1	0	0	0	0	0
Q5FW85	Q5FW85	Extracellular matrix protein 2	Ecm2	0.91223	-0.13253	0.701503	4	4	NaN	21.7976	21.7947	21.5941	21.367	NaN	NaN	21.4771	22.3762	20.9042	21.2659	4	4	4	7.8	7.8	7.8	76.675	0	7.731	56932000	4	1	2	4	2	2	1	1	2	4	2	2	0	0	0	0	1	1	0	0
O08644	O08644	Ephrin type-B receptor 6	Ephb6	1.06821	0.0952	0.70424	4	4	NaN	20.9634	20.7878	21.3555	NaN	21.4443	21.3414	NaN	21.6927	21.0075	20.8901	3	3	3	4.5	4.5	4.5	110.11	0	6.1514	34712000	6	1	3	2	3	2	2	2	0	2	3	2	0	0	1	0	0	1	0	0
P20918;CON__P06868	P20918	Plasminogen;Plasmin heavy chain A;Activation peptide;Angiostatin;Plasmin heavy chain A, short form;Plasmin light chain B	Plg	1.08977	0.124025	0.705465	6	5	29.1311	28.594	28.8091	29.3377	29.0535	29.0852	29.2033	30.2807	28.8916	28.2772	28.9761	51	51	51	71.1	71.1	71.1	90.807	0	323.31	13244000000	292	32	38	38	37	31	29	28	48	42	36	40	0	0	0	0	0	1	0	0
P63028	P63028	Translationally-controlled tumor protein	Tpt1	0.905326	-0.14349	0.706731	4	3	NaN	21.4369	21.1749	21.0887	20.6537	NaN	NaN	NaN	20.7849	21.6396	20.4107	2	2	2	15.7	15.7	15.7	19.462	0	6.7075	35280000	10	0	2	2	2	2	1	1	1	2	2	2	1	0	0	0	0	0	0	0
P03953	P03953	Complement factor D	Cfd	1.1272	0.172741	0.708962	6	5	27.2748	25.3803	26.8409	26.5871	25.601	25.8349	26.6602	27.4795	26.1458	25.5222	26.3218	4	4	4	15.4	15.4	15.4	28.057	0	56.877	1850800000	39	3	4	4	4	4	3	3	4	3	4	4	0	0	0	0	0	1	0	0
P17742	P17742	Peptidyl-prolyl cis-trans isomerase A;Peptidyl-prolyl cis-trans isomerase A, N-terminally processed	Ppia	0.910598	-0.135114	0.711912	6	5	26.2446	27.0221	26.834	25.7352	25.9271	26.3255	25.9475	26.5653	26.1905	27.0843	25.2774	12	12	12	74.4	74.4	74.4	17.971	0	92.791	1791400000	82	9	10	10	10	10	8	8	9	9	10	10	1	0	0	0	0	1	0	0
Q9CQI6	Q9CQI6	Coactosin-like protein	Cotl1	0.942268	-0.085791	0.716393	5	4	NaN	22.4438	22.2594	22.2955	22.0652	22.8758	22.3291	NaN	22.052	22.8269	22.0008	3	3	3	29.6	29.6	29.6	15.944	0.0025543	3.698	83963000	10	1	2	3	3	3	2	2	1	3	3	2	1	1	0	0	0	0	0	0
Q61704;CON__Q0V8M9	Q61704	Inter-alpha-trypsin inhibitor heavy chain H3	Itih3	1.08637	0.119518	0.727931	6	5	26.0198	25.5388	26.5043	25.5533	26.2052	26.2145	25.937	27.3382	25.7683	25.5567	26.0273	19	19	19	25.8	25.8	25.8	99.357	0	193.22	1728500000	104	7	14	16	11	11	7	8	17	12	12	10	0	0	0	0	0	1	0	0
Q9QYB1	Q9QYB1	Chloride intracellular channel protein 4	Clic4	0.895917	-0.158563	0.728151	4	3	NaN	22.2297	21.5095	21.5397	21.1736	NaN	NaN	NaN	21.4496	22.1658	20.7484	3	3	3	18.2	18.2	18.2	28.729	0	6.4788	47793000	8	1	3	2	2	2	0	1	1	2	3	2	1	1	1	1	0	0	0	0
Q9CYN9	Q9CYN9	Renin receptor	Atp6ap2	1.05572	0.078232	0.728616	6	5	25.0582	25.1563	25.0738	25.1119	25.2462	26.0051	25.4694	24.8319	25.3566	25.8229	25.2866	12	12	12	37.1	37.1	37.1	39.091	0	73.513	758110000	54	4	9	7	7	9	4	6	8	10	9	8	0	0	1	0	0	0	0	0
Q9DBD0	Q9DBD0	Inhibitor of carbonic anhydrase	Ica	1.08786	0.12149	0.729027	6	5	27.0272	26.0524	26.2878	26.9797	26.5337	26.7348	26.7829	27.8322	26.4285	25.846	26.7308	30	29	28	52.1	51	51	76.765	0	323.31	2530800000	152	12	19	23	21	18	14	13	27	23	21	23	0	0	0	0	0	1	0	0
Q8R366	Q8R366	Immunoglobulin superfamily member 8	Igsf8	1.09547	0.131552	0.734754	5	5	NaN	22.8385	22.1618	22.5219	22.7716	23.428	23.7387	21.8166	22.7361	23.0841	23.0039	4	4	4	8.8	8.8	8.8	65.01	0	14.08	132790000	18	1	4	4	4	4	4	3	3	4	4	4	0	0	1	0	0	0	0	0
O70362	O70362	Phosphatidylinositol-glycan-specific phospholipase D	Gpld1	1.03247	0.0460963	0.736227	6	5	26.0323	26.0771	25.7734	25.9652	26.3378	26.0681	26.1924	26.4003	26.0716	25.6933	26.0845	19	19	19	25.1	25.1	25.1	93.254	0	105.27	1379000000	76	8	15	16	18	15	12	13	15	18	16	19	0	0	0	0	0	1	0	0
P20033	P20033	Platelet-derived growth factor subunit A	Pdgfa	0.900422	-0.151326	0.738441	5	5	NaN	21.7746	21.7103	22.268	23.1458	22.0652	22.2225	20.7113	22.5881	22.6673	22.0179	2	2	2	14.7	14.7	14.7	24.102	0	8.3349	87651000	12	1	2	1	1	1	1	1	1	1	1	1	0	0	0	0	0	1	0	0
Q04447	Q04447	Creatine kinase B-type	Ckb	1.15458	0.207362	0.744108	6	5	26.6539	26.6536	28.432	25.9288	26.2493	27.0029	26.7824	25.9687	27.6986	28.6993	25.9883	15	15	15	57.2	57.2	57.2	42.713	0	166.28	3141900000	108	7	14	13	10	9	9	7	13	14	14	12	1	0	0	0	0	0	0	0
O88745	O88745	Scrapie-responsive protein 1	Scrg1	1.1263	0.171597	0.745066	6	5	22.9469	24.1068	24.0542	24.0934	24.1331	23.1817	22.449	23.0735	24.5809	25.1129	24.4051	2	2	2	24.5	24.5	24.5	11.173	0	16.254	326310000	16	2	2	2	2	2	1	2	1	2	2	2	0	0	0	0	0	1	0	0
P04925	P04925	Major prion protein	Prnp	0.923728	-0.114459	0.746219	6	5	23.9277	23.7566	24.8011	24.6173	24.1339	23.8539	23.6081	23.0692	24.4543	24.7225	24.4825	4	4	4	17.7	17.7	17.7	27.977	0	21.478	410320000	24	2	4	3	2	3	3	3	4	4	2	2	0	0	1	0	0	0	0	1
Q62443	Q62443	Neuronal pentraxin-1	Nptx1	0.954337	-0.06743	0.747348	6	5	27.5437	27.4674	26.9468	27.6147	27.6285	27.534	27.4981	26.6561	27.6521	27.5887	27.5472	13	13	13	28	28	28	47.117	0	189.06	3447300000	108	11	13	10	11	11	10	11	12	12	11	12	0	0	0	0	0	0	1	0
Q64449	Q64449	C-type mannose receptor 2	Mrc2	0.943062	-0.084575	0.749619	4	4	NaN	22.3472	21.5386	21.3958	21.8197	NaN	NaN	21.8275	21.8901	21.7724	21.273	4	4	4	3.3	3.3	3.3	167.07	0	9.8807	60989000	13	1	3	3	3	3	1	2	2	2	3	3	0	0	1	0	0	0	0	0
P12960	P12960	Contactin-1	Cntn1	0.933041	-0.0999883	0.750143	6	5	28.1762	27.8708	27.9901	27.7081	27.9884	27.8217	28.4336	26.577	27.9568	27.8972	28.2647	33	33	33	39.6	39.6	39.6	113.39	0	244.82	4643300000	219	24	33	29	27	28	21	25	20	30	30	27	0	0	1	0	0	0	0	1
Q9DBH5	Q9DBH5	Vesicular integral-membrane protein VIP36	Lman2	1.054	0.0758742	0.751473	4	3	NaN	22.9558	NaN	22.8515	22.6842	23.0298	NaN	NaN	22.5647	22.8842	23.4197	2	2	2	5.3	5.3	5.3	40.429	0	4.6699	109520000	6	1	2	1	2	2	2	1	1	2	2	2	0	0	1	0	0	0	0	0
P09103	P09103	Protein disulfide-isomerase	P4hb	1.02946	0.0418942	0.756128	6	4	22.1512	22.4668	22.6138	22.1774	22.2492	22.2148	NaN	22.1549	22.2337	22.6697	22.358	9	9	9	21.2	21.2	21.2	57.058	0	13.054	98312000	19	3	6	5	4	5	3	1	5	6	4	6	0	0	1	0	0	0	0	0
P26883	P26883	Peptidyl-prolyl cis-trans isomerase FKBP1A	Fkbp1a	0.912145	-0.132665	0.757935	5	4	NaN	21.9343	22.0963	21.1188	21.8877	22.1391	NaN	20.6618	21.5358	22.5696	22.0432	2	2	2	15.7	15.7	15.7	11.922	0	4.5742	63767000	7	1	2	2	2	2	2	1	2	2	2	2	1	0	0	0	0	0	0	0
P55284	P55284	Cadherin-5	Cdh5	0.976549	-0.0342363	0.760056	6	5	23.2497	23.3573	23.6161	23.5337	23.405	23.8199	23.5431	23.2488	23.3906	23.5283	23.6028	9	9	9	13	13	13	87.902	0	24.892	218940000	37	3	9	7	7	7	4	6	6	9	8	8	0	0	1	0	0	0	0	0
Q3UHD1	Q3UHD1	Brain-specific angiogenesis inhibitor 1	Bai1	0.95595	-0.0649923	0.766246	6	5	23.0302	23.1783	22.4967	23.0969	23.0118	23.0401	23.2538	22.1461	22.8795	23.088	23.1862	5	5	5	5	5	5	173.29	0	10.204	161570000	14	4	4	4	4	4	4	4	3	4	4	4	0	0	1	0	0	0	0	0
Q8VCR7	Q8VCR7	Alpha/beta hydrolase domain-containing protein 14B	Abhd14b	1.09608	0.132353	0.773903	4	3	NaN	22.4934	22.6526	21.2512	21.822	NaN	NaN	22.1285	21.782	22.6511	NaN	4	4	4	27.1	27.1	27.1	22.45	0	7.8862	72358000	8	1	4	4	3	3	1	1	3	2	4	1	1	1	0	0	0	0	0	0
O08553	O08553	Dihydropyrimidinase-related protein 2	Dpysl2	0.897174	-0.15654	0.775367	4	4	NaN	22.7898	22.5189	21.0736	NaN	21.6296	NaN	21.4748	21.5293	22.8746	21.5069	5	5	5	15.4	15.4	15.4	62.277	0	12.508	70373000	6	0	5	4	2	1	3	1	3	3	5	2	1	0	1	0	0	0	0	0
Q08890	Q08890	Iduronate 2-sulfatase	Ids	0.943976	-0.0831777	0.777467	6	5	23.7898	23.2453	23.8389	23.8951	23.7389	24.1359	23.7435	22.6302	23.7838	24.0584	24.2382	8	8	8	21.9	21.9	21.9	62.185	0	19.347	277470000	37	3	7	5	3	6	4	4	7	4	7	5	0	0	0	0	0	0	1	0
P56388	P56388	Cocaine- and amphetamine-regulated transcript protein;CART(1-52);CART(55-102);CART(62-102)	Cartpt	0.936407	-0.0947925	0.77942	5	4	22.3546	22.6353	NaN	22.9326	22.5601	23.9455	22.7089	NaN	23.0219	22.7502	22.6824	3	3	3	22.5	22.5	22.5	14.285	0	9.6357	108990000	10	2	3	1	3	3	2	2	0	2	3	3	0	0	0	0	0	1	0	0
Q6NZL8	Q6NZL8	Signal peptide, CUB and EGF-like domain-containing protein 1	Scube1	1.13187	0.178712	0.780132	6	4	23.3999	20.7545	23.0311	23.6167	23.3597	22.9577	23.7802	22.0317	NaN	22.8594	23.4566	2	2	2	2.9	2.9	2.9	111.6	0	16.114	150110000	12	2	2	2	2	2	2	2	2	1	2	2	0	0	1	0	0	1	0	0
P45700	P45700	Mannosyl-oligosaccharide 1,2-alpha-mannosidase IA	Man1a1	0.965381	-0.0508297	0.78034	6	5	25.7644	26.0619	25.5914	25.9454	26.0036	25.6255	25.7878	25.1617	25.7898	26.1089	26.0578	16	16	16	27.9	27.9	27.9	73.275	0	38.739	1076700000	58	9	11	12	12	11	9	9	11	13	12	11	0	0	1	0	0	0	0	0
Q8R1I2	Q8R1I2	Gastrin-releasing peptide;Neuromedin-C	Grp	1.02888	0.0410717	0.788165	6	4	23.0944	23.0665	22.4149	22.7448	23.141	23.0072	23.0145	NaN	22.8354	22.9222	23.0381	3	3	3	21.2	21.2	21.2	15.659	0	9.7158	131830000	10	3	3	3	3	3	2	2	1	3	3	3	0	0	0	0	0	1	0	0
P20152;P31001;P15331;P46660;P08551;P08553	P20152	Vimentin	Vim	0.930669	-0.10366	0.791795	6	5	23.9836	23.2337	24.8224	24.1691	23.7121	24.3042	23.4895	23.1045	23.7036	24.8225	24.5493	14	13	12	29.4	27.9	26	53.687	0	37.558	327590000	33	6	5	12	10	6	6	7	7	9	11	10	1	0	0	0	0	0	0	0
P55066	P55066	Neurocan core protein	Ncan	0.948059	-0.0769507	0.795474	6	5	24.9886	24.9077	24.425	25.0033	25.0681	25.3626	25.3347	23.8291	25.3803	24.879	24.9882	8	8	8	6.6	6.6	6.6	137.2	0	26.074	572490000	36	4	5	6	6	8	8	8	5	8	8	8	0	0	0	0	0	1	0	0
Q9QUR8	Q9QUR8	Semaphorin-7A	Sema7a	0.96634	-0.0493967	0.795604	6	5	27.3116	27.4129	27.1211	27.1595	27.3306	27.599	27.62	26.6136	27.1275	27.5644	27.4398	24	24	24	46.1	46.1	46.1	74.993	0	121.59	3000700000	159	15	19	19	17	17	15	12	18	19	21	17	0	0	1	0	0	0	0	1
Q9DAK9	Q9DAK9	14 kDa phosphohistidine phosphatase	Phpt1	0.91688	-0.125195	0.796814	6	4	22.1011	22.1893	22.6258	20.8328	20.702	21.8619	20.7884	21.6407	21.599	22.3463	NaN	3	3	3	30.6	30.6	30.6	13.996	0	4.815	65881000	7	2	3	3	1	2	2	2	3	3	3	0	1	0	0	0	0	0	0	0
Q8K135	Q8K135	Dyslexia-associated protein KIAA0319-like protein	Kiaa0319l	0.947006	-0.078554	0.797521	5	5	21.917	NaN	21.6051	21.9057	22.243	22.4794	22.4545	20.9776	22.1056	22.0039	22.216	3	3	3	2.9	2.9	2.9	115.31	0	5.8303	70580000	11	2	1	2	2	3	2	3	2	3	2	3	0	0	1	0	0	0	0	0
Q62288	Q62288	Testican-1	Spock1	1.03718	0.052668	0.79776	6	5	24.0786	24.172	24.1235	23.9842	24.3275	24.0304	24.3441	23.3537	24.1954	24.4147	24.5522	8	8	7	26.9	26.9	24.7	49.55	0	40.043	346970000	32	3	6	6	4	4	5	5	5	4	6	5	0	0	0	0	1	1	0	0
Q8CEF9	Q8CEF9	Transmembrane protein 132C	Tmem132c	1.04582	0.06463	0.803763	5	5	21.4609	21.1935	20.9179	21.4514	21.4115	NaN	21.6223	20.4967	21.7285	21.6561	21.2547	4	4	4	5	5	5	121.38	0	8.2122	45766000	9	3	4	3	4	3	1	2	2	2	4	2	0	0	1	0	0	0	0	0
Q8BKV0	Q8BKV0	Testican-3	Spock3	0.946889	-0.078733	0.805715	6	5	23.3418	24.03	23.2308	22.8217	23.4535	23.5261	22.4463	22.9006	23.7231	23.9731	23.5666	7	6	6	25	22.7	22.7	49.097	0	21.68	217710000	17	2	4	3	2	4	3	4	3	4	3	2	0	0	0	0	1	1	0	0
P21614;CON__Q3MHN5;CON__ENSEMBL:ENSBTAP00000018229	P21614	Vitamin D-binding protein	Gc	1.05455	0.0766277	0.808486	6	5	30.0741	29.5137	29.9677	30.1516	29.5997	29.661	30.1888	30.8185	29.3891	29.0462	30.0804	30	30	30	58.6	58.6	58.6	53.6	0	323.31	19827000000	237	22	22	22	24	22	18	21	30	25	19	20	0	0	0	0	0	1	0	0
P62259	P62259	14-3-3 protein epsilon	Ywhae	1.09218	0.127206	0.810103	6	5	24.2795	24.4298	24.7069	23.206	22.2699	23.2639	23.1128	23.9345	23.9894	24.8953	23.1673	13	13	11	48.6	48.6	41.6	29.174	0	42.574	331370000	30	7	9	9	6	2	3	4	7	9	10	5	1	0	0	0	0	0	0	0
P06837	P06837	Neuromodulin	Gap43	0.928284	-0.107363	0.811313	3	4	21.9016	21.905	20.5079	NaN	NaN	NaN	21.7156	NaN	21.004	21.2507	21.3527	3	3	3	23.8	23.8	23.8	23.632	0	4.4614	36634000	5	2	2	3	0	1	1	2	1	2	3	3	0	0	1	0	0	0	0	0
P14106	P14106	Complement C1q subcomponent subunit B	C1qb	0.955	-0.066427	0.813914	6	5	24.751	24.312	25.0021	25.6591	25.2591	24.8932	24.6539	24.3705	24.8224	25.2362	25.4819	5	5	5	23.7	23.7	23.7	26.717	0	27.381	609160000	24	5	4	5	5	5	3	3	3	5	4	4	0	0	0	0	0	1	0	0
P19157;P46425	P19157	Glutathione S-transferase P 1	Gstp1	0.9298	-0.105007	0.814662	6	5	23.5204	24.2864	24.7976	23.5836	24.3521	22.7932	23.275	24.1509	23.7725	24.7581	22.9629	7	7	7	42.4	42.4	42.4	23.609	0	41.031	347540000	48	4	7	6	5	6	3	4	6	7	7	3	1	1	0	1	0	0	0	0
Q60648	Q60648	Ganglioside GM2 activator	Gm2a	1.03788	0.0536357	0.815733	6	5	28.4975	29.358	29.0017	28.857	28.837	29.1056	29.4452	28.248	29.0057	29.101	29.1822	9	9	9	42	42	42	20.824	0	131.38	9518500000	82	5	9	9	6	8	7	6	9	8	7	9	0	0	0	0	0	0	1	0
Q8VCF1	Q8VCF1	Soluble calcium-activated nucleotidase 1	Cant1	0.969245	-0.045067	0.816112	6	5	25.1757	24.8059	24.6162	24.9379	24.7059	25.0862	25.0755	24.1679	24.8946	25.1838	24.8925	14	14	14	44.7	44.7	44.7	45.652	0	36.317	574430000	58	8	13	12	13	11	6	6	9	13	12	13	0	0	1	0	0	0	0	0
Q07235	Q07235	Glia-derived nexin	Serpine2	1.02125	0.03034	0.82225	6	5	22.8524	22.9642	23.1334	22.9765	22.7346	23.0701	23.0137	23.2003	22.905	22.5501	23.2587	9	9	9	28.7	28.7	28.7	44.207	0	23.532	163700000	31	3	5	5	5	4	4	3	6	7	7	5	0	0	0	0	0	1	0	0
O08532	O08532	Voltage-dependent calcium channel subunit alpha-2/delta-1;Voltage-dependent calcium channel subunit alpha-2-1;Voltage-dependent calcium channel subunit delta-1	Cacna2d1	0.952547	-0.0701373	0.822364	6	5	25.9942	26.1039	25.6739	25.8715	26.3161	26.6269	26.5831	24.9078	26.3073	26.1014	26.2383	25	25	23	27.3	27.3	25.6	124.63	0	93.303	1283200000	111	15	18	17	17	16	16	16	17	22	20	18	0	0	1	0	0	0	0	0
O35188	O35188	Fractalkine;Processed fractalkine	Cx3cl1	1.05347	0.0751558	0.823128	6	4	25.9317	26.0147	24.6865	25.028	25.8343	24.7368	25.4566	NaN	25.6318	25.1953	25.5049	1	1	1	4.6	4.6	4.6	42.098	0	8.9579	738110000	14	1	1	1	1	1	1	1	1	1	1	1	0	0	1	0	0	1	0	0
P10852	P10852	4F2 cell-surface antigen heavy chain	Slc3a2	1.03198	0.045418	0.829305	5	5	21.8801	21.3588	21.5917	21.5923	21.9981	NaN	22.087	21.5891	21.3706	22.1783	21.4231	3	3	3	7.8	7.8	7.8	58.336	0	7.9422	62777000	11	2	3	3	3	3	0	2	3	3	3	3	0	0	1	0	0	0	0	0
P18760	P18760	Cofilin-1	Cfl1	0.948387	-0.0764523	0.835834	6	5	24.1042	24.8651	24.9315	23.6183	23.5815	23.7145	23.8341	23.992	23.9966	24.9828	23.4916	9	9	8	65.1	65.1	58.4	18.559	0	24.819	381380000	42	5	7	7	4	5	3	3	6	4	8	5	1	1	1	0	0	0	0	0
P22005	P22005	Proenkephalin-A;Synenkephalin;Met-enkephalin;PENK(114-133);PENK(143-184);Met-enkephalin-Arg-Ser-Leu;Leu-enkephalin;PENK(238-259);Met-enkephalin-Arg-Phe	Penk	0.950786	-0.0728073	0.837656	6	5	29.4289	28.6375	28.3313	28.6253	28.8335	29.6404	29.5835	27.8216	28.8984	29.0118	28.9013	8	8	8	34	34	34	31.004	0	298.17	8791400000	50	3	8	7	5	6	4	5	6	7	7	6	0	0	0	0	0	1	0	0
Q99N28	Q99N28	Cell adhesion molecule 3	Cadm3	0.95328	-0.0690277	0.840714	6	5	24.131	25.1839	24.7499	24.7107	24.7869	23.5831	23.7457	24.1709	25.0682	24.8331	24.4582	5	5	5	22.2	22.2	22.2	42.964	0	23.069	482710000	31	5	5	5	4	5	4	2	3	5	5	5	0	0	1	0	0	0	0	0
P28653	P28653	Biglycan	Bgn	0.954625	-0.066994	0.843333	5	5	NaN	23.6909	23.5283	22.8556	22.9917	22.2606	23.016	22.2126	23.2004	23.1548	23.4083	7	7	7	26.3	26.3	26.3	41.639	0	24.501	172820000	27	1	5	6	5	4	4	4	6	6	5	6	0	0	0	0	1	1	0	0
P21981	P21981	Protein-glutamine gamma-glutamyltransferase 2	Tgm2	1.05735	0.0804587	0.846799	5	3	NaN	22.0251	22.3996	21.3713	21.6691	21.6979	NaN	22.0487	21.0883	22.6022	NaN	7	7	7	13.6	13.6	13.6	77.06	0	10.6	63663000	15	1	6	6	2	4	2	0	6	2	7	0	0	0	0	0	0	0	1	0
P54923	P54923	[Protein ADP-ribosylarginine] hydrolase	Adprh	0.963854	-0.0531133	0.856343	6	4	20.8998	22.3625	21.6912	21.2129	21.4884	21.5932	NaN	21.1551	21.4637	21.9429	21.391	3	3	3	13.8	13.8	13.8	40.068	0	6.6217	58691000	11	2	3	2	2	3	2	1	3	3	3	2	0	0	0	0	0	0	1	0
Q9CQM5	Q9CQM5	Thioredoxin domain-containing protein 17	Txndc17	1.05396	0.0758208	0.856562	4	3	NaN	21.9259	22.1335	21.2496	21.5593	NaN	NaN	21.4956	21.322	22.5611	NaN	2	2	2	18.7	18.7	18.7	14.015	0	7.5813	60049000	11	1	2	2	2	2	0	1	2	2	2	1	1	0	0	0	0	0	0	0
Q8VI51	Q8VI51	VPS10 domain-containing receptor SorCS3	Sorcs3	1.06686	0.0933687	0.85703	5	3	NaN	22.9172	21.7725	22.9058	21.0222	22.3404	22.2122	22.0356	NaN	NaN	22.6072	3	3	3	3.2	3.2	3.2	135.98	0	9.5244	82868000	15	1	3	2	2	2	3	2	2	1	1	3	0	0	1	0	0	0	0	0
Q01339;CON__P17690	Q01339	Beta-2-glycoprotein 1	Apoh	1.0263	0.037452	0.865241	6	5	26.4424	25.7226	26.2543	26.0789	25.8667	26.2707	26.3727	26.5367	25.8691	25.5117	26.4267	18	18	18	50.1	50.1	50.1	38.618	0	87.242	1412300000	79	11	12	14	13	10	14	12	16	15	10	13	0	0	0	0	0	1	0	0
Q08761;CON__P07224	Q08761	Vitamin K-dependent protein S	Pros1	0.96875	-0.045804	0.86854	6	5	25.7086	26.3041	26.6186	26.1579	26.1645	26.2448	26.0489	25.3221	26.009	26.8248	26.5649	14	14	14	20.4	20.4	20.4	74.934	0	70.054	1463800000	90	7	12	11	12	12	7	6	8	10	12	12	0	0	0	0	0	1	0	0
Q64487	Q64487	Receptor-type tyrosine-protein phosphatase delta	Ptprd	1.03288	0.046666	0.868783	5	5	NaN	22.41	21.9377	22.1476	22.4525	22.5158	22.6503	21.4516	22.1307	22.8405	22.6239	10	10	8	5.8	5.8	4.6	214.41	0	11.846	94647000	10	1	6	6	3	4	3	2	3	5	7	5	0	0	1	0	0	0	0	0
P26339	P26339	Chromogranin-A;Pancreastatin;Beta-granin;WE-14;Catestatin;GE-25;Serpinin-RRG;Serpinin;p-Glu serpinin precursor	Chga	0.969827	-0.0442013	0.870124	6	5	30.3965	30.4963	30.0414	30.3126	30.5331	29.9358	30.5367	29.3489	30.8992	30.4064	30.0176	28	28	28	50.8	50.8	50.8	51.789	0	323.31	24956000000	227	21	21	25	24	23	19	16	23	26	22	23	0	0	1	0	0	1	0	0
A2AVA0	A2AVA0	Sushi, von Willebrand factor type A, EGF and pentraxin domain-containing protein 1	Svep1	0.981262	-0.0272895	0.871038	5	4	NaN	22.3641	22.6499	22.6542	22.4805	22.9561	22.6451	NaN	22.6276	22.2339	22.8681	6	6	6	2.3	2.3	2.3	387.45	0	11.104	94031000	14	0	4	5	4	3	2	5	0	6	3	5	1	0	1	0	0	1	0	0
Q8BNJ2	Q8BNJ2	A disintegrin and metalloproteinase with thrombospondin motifs 4	Adamts4	0.966912	-0.048544	0.871475	6	5	23.9731	24.2444	23.2041	23.243	23.0004	23.5743	23.7851	22.682	23.5499	23.5449	23.8949	3	3	3	6.1	6.1	6.1	90.069	0	25.381	241260000	18	2	3	3	3	2	2	2	3	3	3	2	0	0	0	0	1	1	0	0
P50429	P50429	Arylsulfatase B	Arsb	0.964814	-0.051678	0.87175	5	5	NaN	22.1104	22.4209	22.2139	21.9117	23.051	22.2474	21.5303	22.8792	22.7198	22.0727	6	6	6	11.8	11.8	11.8	59.646	0	11.947	106600000	20	2	4	5	3	4	3	2	5	3	5	4	0	0	0	0	0	0	1	0
Q9Z2L6	Q9Z2L6	Multiple inositol polyphosphate phosphatase 1	Minpp1	1.01833	0.026205	0.873026	6	5	25.0929	24.5399	24.9429	24.4335	24.8567	24.8778	25.0947	24.3625	24.8795	24.9527	24.7946	10	10	10	29.3	29.3	29.3	54.537	0	36.43	581920000	49	4	10	9	5	6	4	4	5	9	9	9	0	0	1	0	0	0	0	0
Q6P1B3	Q6P1B3	PILR alpha-associated neural protein	Pianp	1.04068	0.0575317	0.873578	6	3	23.6865	22.6405	23.0668	23.2564	23.2785	23.5342	22.4875	23.5844	23.8322	NaN	NaN	2	2	2	6.8	6.8	6.8	29.743	0	4.2371	184720000	10	2	2	2	2	2	2	2	2	2	1	1	0	0	1	0	0	0	0	0
P70126	P70126	Alpha-2,8-sialyltransferase 8E	St8sia5	1.0591	0.0828417	0.874802	3	4	NaN	21.9718	21.4402	NaN	20.7365	NaN	NaN	20.4952	22.0533	21.7321	21.5821	3	3	3	11.4	11.4	11.4	47.828	0	5.8709	52337000	8	1	3	2	1	2	1	1	2	3	2	2	0	0	1	0	0	0	0	0
O35393	O35393	Ephrin-B3	Efnb3	1.02136	0.0304877	0.880091	6	5	24.1416	24.7355	24.6291	24.499	24.2731	24.3113	24.0576	24.0121	24.9104	24.8031	24.5273	8	8	8	34.4	34.4	34.4	35.884	0	29.45	450530000	48	3	5	4	5	5	4	4	6	8	7	6	0	0	1	0	0	0	0	0
Q8R422	Q8R422	CD109 antigen	Cd109	1.02054	0.0293377	0.883021	6	5	22.4756	22.5149	22.1482	22.0177	22.3624	22.4099	22.5673	21.6272	22.3619	22.732	22.4655	9	9	9	8.7	8.7	8.7	161.66	0	21.845	98906000	23	4	6	5	3	4	2	4	3	6	7	6	0	0	1	0	0	0	0	1
P10810	P10810	Monocyte differentiation antigen CD14	Cd14	0.960759	-0.057754	0.885622	6	5	23.9503	24.1625	24.4369	24.5674	24.5798	24.3873	23.9371	23.0869	24.2326	25.6255	24.5661	10	10	10	29	29	29	39.203	0	23.857	410840000	44	8	8	9	9	10	9	5	6	9	10	9	0	0	1	0	0	1	0	1
Q8BSL7;P84078;P61205;P84084;P61750	Q8BSL7;P84078;P61205	ADP-ribosylation factor 2;ADP-ribosylation factor 1;ADP-ribosylation factor 3	Arf2;Arf1;Arf3	1.04049	0.0572665	0.898348	5	4	NaN	21.3962	21.8885	20.6654	20.5547	21.626	NaN	20.9074	21.0731	22.3372	20.816	3	3	3	27.6	27.6	27.6	20.746	0	8.742	47204000	9	1	2	2	2	2	2	1	2	3	3	2	1	0	1	0	0	0	0	0
Q9D358	Q9D358	Low molecular weight phosphotyrosine protein phosphatase	Acp1	1.02114	0.0301797	0.902028	6	5	21.2759	21.7225	22.3235	21.6093	21.5191	21.9683	21.9571	22.0743	21.4864	22.1512	21.164	3	3	3	20.3	20.3	20.3	18.192	0	7.4059	69454000	12	2	3	3	2	3	2	2	3	2	3	3	1	0	0	0	0	0	0	0
Q9CQ60	Q9CQ60	6-phosphogluconolactonase	Pgls	0.95856	-0.06106	0.902956	5	4	NaN	22.0363	22.2463	20.4723	22.0186	22.4422	21.8198	21.4714	21.2028	22.6345	NaN	4	4	4	21.8	21.8	21.8	27.254	0	5.8341	64292000	5	0	4	4	2	2	2	3	4	2	4	1	1	0	0	0	0	0	0	0
Q76KF0	Q76KF0	Semaphorin-6D	Sema6d	0.982285	-0.025786	0.907345	6	5	24.3527	23.8532	23.7778	23.9497	23.9159	24.2611	24.273	23.1657	24.2133	24.1988	24.1122	9	9	9	11.6	11.6	11.6	119.81	0	18.95	308200000	42	5	9	7	8	5	5	7	6	8	8	8	0	0	1	0	0	0	0	0
O88947	O88947	Coagulation factor X;Factor X light chain;Factor X heavy chain;Activated factor Xa heavy chain	F10	0.954505	-0.067176	0.907351	6	5	23.6569	23.6017	22.8605	23.7076	23.4507	23.2821	23.4279	25.5864	22.9918	22.0294	22.7615	9	9	9	23.3	23.3	23.3	54.017	0	46.494	321080000	25	4	5	5	4	5	4	3	9	4	3	4	0	0	0	0	0	1	0	0
Q9JM99	Q9JM99	Proteoglycan 4;Proteoglycan 4 C-terminal part	Prg4	1.0287	0.040823	0.907592	6	5	25.2683	24.232	26.0318	25.8082	25.1246	24.7013	25.3478	25.1621	25.8432	24.9983	24.8246	13	13	13	14.9	14.9	14.9	115.99	0	44.53	798960000	48	7	6	8	11	10	7	7	12	11	11	9	0	0	0	0	0	1	0	0
Q00915	Q00915	Retinol-binding protein 1	Rbp1	0.95756	-0.062565	0.911791	6	4	24.2624	24.9702	25.4552	23.1088	23.5407	24.7997	23.8532	24.2498	23.6916	25.3798	NaN	9	9	9	54.8	54.8	54.8	15.846	0	36.426	455730000	35	7	9	9	4	6	6	5	5	6	8	1	1	0	0	0	0	0	0	0
Q6GQT1;REV__Q6QNU9	Q6GQT1	Alpha-2-macroglobulin-P	A2mp	1.0178	0.0254527	0.912325	6	5	29.3337	29.3424	29.6207	29.4758	29.5473	29.6791	29.6494	28.694	29.4642	30.167	29.6518	62	61	58	50.7	50.2	47.8	164.35	0	323.31	14728000000	470	42	52	48	46	47	39	39	52	51	54	48	0	0	0	0	0	1	0	0
Q8BQ86	Q8BQ86	Carbohydrate sulfotransferase 8	Chst8	1.04567	0.06443	0.913512	3	3	22.5905	21.139	NaN	22.455	NaN	NaN	NaN	21.5062	22.4547	22.4169	NaN	2	2	2	7.2	7.2	7.2	48.282	0.0024969	3.5698	65870000	6	1	1	1	1	1	0	1	1	2	2	1	0	0	1	0	0	0	0	0
Q01149	Q01149	Collagen alpha-2(I) chain	Col1a2	1.01957	0.027955	0.916554	6	5	24.4744	25.8271	25.6497	25.3372	24.9159	24.8734	25.4179	24.841	25.5288	25.0008	25.2493	8	8	8	6.9	6.9	6.9	129.56	0	153.16	748390000	50	5	7	7	6	5	4	5	7	6	5	6	0	0	0	0	1	1	0	0
P09813	P09813	Apolipoprotein A-II;Proapolipoprotein A-II	Apoa2	1.05076	0.0714333	0.917497	6	5	28.3089	27.8666	25.9144	27.388	27.8037	27.6551	27.3384	29.9089	26.6425	26.4723	27.4423	2	2	2	34.3	34.3	34.3	11.309	0	120.3	5976700000	26	1	1	1	1	1	1	1	2	2	1	1	0	0	0	0	0	1	0	0
P14152	P14152	Malate dehydrogenase, cytoplasmic	Mdh1	0.982636	-0.0252713	0.924024	6	5	24.211	23.7253	23.6771	23.4546	23.5181	23.9663	24.3473	22.9669	23.5818	24.1941	23.5774	6	6	6	26.6	26.6	26.6	36.511	0	18.392	269700000	32	3	5	4	4	4	3	3	6	5	6	6	1	0	0	0	0	0	0	0
O35405	O35405	Phospholipase D3	Pld3	1.01983	0.0283337	0.924473	6	5	24.744	23.3728	24.0567	24.2415	24.3687	24.7212	24.83	23.6812	24.0669	24.5613	24.2563	6	6	6	16.4	16.4	16.4	54.388	0	34.898	365630000	35	3	6	4	4	4	4	3	5	5	6	5	0	0	1	0	0	0	0	0
Q91X88	Q91X88	Protein O-linked-mannose beta-1,2-N-acetylglucosaminyltransferase 1	Pomgnt1	1.01212	0.0173827	0.924568	6	5	22.085	22.6078	22.0275	22.1249	22.2176	22.2084	22.4581	21.5669	22.2864	22.4543	22.3805	7	7	7	14.2	14.2	14.2	75.109	0	15.632	96885000	19	3	5	6	4	5	3	2	6	6	6	6	0	0	1	0	0	0	0	0
Q9ET22	Q9ET22	Dipeptidyl peptidase 2	Dpp7	1.01916	0.0273757	0.924821	6	5	22.5674	22.3281	22.3259	22.1415	22.8847	23.1934	22.7353	21.7422	22.4707	23.1438	22.9124	3	3	3	7.1	7.1	7.1	56.253	0	9.4504	108880000	19	3	3	3	3	3	3	3	2	3	3	3	0	0	0	0	0	1	0	0
Q02053	Q02053	Ubiquitin-like modifier-activating enzyme 1	Uba1	1.03414	0.04843	0.924874	6	3	22.1808	22.5394	22.3449	20.7128	21.0731	21.6083	NaN	22.0949	21.1003	22.1797	NaN	6	6	6	9.5	9.5	9.5	117.81	0	12.038	65767000	10	2	5	5	2	3	2	0	4	3	5	1	1	1	0	1	0	0	0	0
O08677	O08677	Kininogen-1;Kininogen-1 heavy chain;Bradykinin;Kininogen-1 light chain	Kng1	0.976492	-0.0343193	0.925157	6	5	30.0856	29.6586	29.8982	29.7084	30.1215	30.0611	30.1375	31.2	29.3726	28.9777	29.7519	24	24	24	35.2	35.2	35.2	73.101	0	323.31	22859000000	195	16	19	18	20	17	15	16	22	19	18	18	0	0	0	0	0	1	0	0
P42703	P42703	Leukemia inhibitory factor receptor	Lifr	1.02113	0.030165	0.928965	6	5	24.8292	23.909	23.2846	23.7687	24.3622	24.3879	24.6545	24.5368	23.8797	23.321	24.2101	8	8	8	9.8	9.8	9.8	122.57	0	25.098	364270000	42	5	8	6	6	8	6	4	8	7	8	8	0	0	1	0	0	1	0	0
Q9JJV2	Q9JJV2	Profilin-2	Pfn2	0.990953	-0.0131117	0.93983	6	3	21.8431	21.9698	22.209	21.7953	21.9708	21.5546	NaN	NaN	21.6564	22.1899	21.7856	2	2	2	20.7	20.7	20.7	15.032	0.0025316	3.6694	61347000	2	2	2	2	2	2	2	1	1	2	2	2	1	0	0	0	0	0	0	0
P06683	P06683	Complement component C9	C9	1.01828	0.0261377	0.940407	6	5	27.3984	27.3151	26.8554	27.3255	27.0331	27.8322	27.1552	28.5617	27.0709	26.5178	27.2915	23	23	23	39.6	39.6	39.6	62.002	0	323.31	3631700000	108	14	17	19	15	17	12	12	21	17	16	18	0	0	1	0	0	1	0	0
Q8CIF4	Q8CIF4	Biotinidase	Btd	1.00792	0.0113777	0.94773	6	5	23.7221	24.4484	23.5838	24.049	24.2243	24.0116	24.0914	24.3691	23.8181	23.931	23.88	7	7	7	15.4	15.4	15.4	58.154	0	22.928	352760000	31	5	6	6	5	5	4	4	6	7	6	7	0	0	0	0	0	1	0	0
P0C192;Q8C031;Q99PH1	P0C192	Leucine-rich repeat-containing protein 4B	Lrrc4b	0.984138	-0.0230677	0.949073	6	5	25.8512	25.6518	25.2447	25.5239	25.9649	26.0216	26.1394	24.3095	25.6773	26.3184	25.9884	15	15	15	23.4	23.4	23.4	76.155	0	95.218	1040400000	65	5	11	10	9	9	6	8	13	14	13	11	0	0	1	0	0	0	0	0
P97326	P97326	Cadherin-6	Cdh6	1.011	0.0157892	0.949645	4	3	NaN	21.0156	20.6171	21.2615	21.502	NaN	NaN	NaN	21.0123	21.3095	21.0228	4	4	4	5.8	5.8	5.8	88.354	0	9.8276	34736000	12	1	4	3	3	2	1	2	1	4	3	2	0	0	1	0	0	0	0	0
P33587	P33587	Vitamin K-dependent protein C;Vitamin K-dependent protein C light chain;Vitamin K-dependent protein C heavy chain;Activation peptide	Proc	1.00963	0.0138213	0.950797	6	5	22.434	22.7543	22.63	22.5469	22.6145	22.4814	22.1789	23.4702	22.2659	22.3781	22.6603	7	7	7	18.9	18.9	18.9	51.818	0	27.206	132430000	25	2	5	5	5	4	4	5	6	7	6	6	0	0	0	0	0	1	0	0
Q810B8	Q810B8	SLIT and NTRK-like protein 4	Slitrk4	1.00672	0.00966267	0.952179	6	5	23.0226	22.7171	22.6486	22.7975	23.0707	23.1647	23.1298	22.4301	23.1704	23.05	22.7856	4	4	4	6.1	6.1	6.1	94.537	0	13.285	144120000	17	2	4	4	3	2	3	4	3	3	4	4	0	0	1	0	0	0	0	0
Q9WVH9	Q9WVH9	Fibulin-5	Fbln5	1.0102	0.0146363	0.956435	6	5	23.5066	23.561	23.7089	24.3257	23.193	23.4507	24.2367	22.9311	23.4867	23.6761	23.8644	6	6	6	13.8	13.8	13.8	50.193	0	29.451	243570000	29	3	5	6	5	5	4	5	3	5	5	5	0	0	0	0	1	1	0	0
Q9CPT4	Q9CPT4	Myeloid-derived growth factor	Mydgf	0.994427	-0.00806267	0.966061	6	5	23.9908	24.0052	23.3742	23.5212	23.7858	23.5139	23.5513	23.2895	23.6338	24.2282	23.7495	4	4	4	21.7	21.7	21.7	17.982	0	11.048	262720000	15	3	4	3	3	3	3	2	4	3	4	4	0	0	0	0	0	1	0	0
P33434	P33434	72 kDa type IV collagenase;PEX	Mmp2	1.00503	0.007239	0.968289	6	5	23.9208	24.473	24.287	24.183	24.1714	24.3068	24.4094	23.6328	24.2007	24.2222	24.6893	9	9	9	15.9	15.9	15.9	74.102	0	40.555	363890000	40	5	7	5	6	4	4	6	7	7	9	6	1	1	1	1	1	1	0	0
Q9R0E2	Q9R0E2	Procollagen-lysine,2-oxoglutarate 5-dioxygenase 1	Plod1	1.00528	0.007594	0.968578	6	5	24.677	25.3446	25.002	24.9402	25.36	25.0871	24.862	24.5913	25.2234	25.5423	25.1614	20	20	20	37.2	37.2	37.2	83.594	0	57.773	721590000	93	9	15	17	13	15	10	10	17	16	17	16	0	0	1	0	0	0	0	0
P11859;Q499E4	P11859	Angiotensinogen;Angiotensin-1;Angiotensin-2;Angiotensin-3;Angiotensin-4;Angiotensin 1-9;Angiotensin 1-7;Angiotensin 1-5;Angiotensin 1-4	Agt	0.993015	-0.0101127	0.969035	6	5	30.5997	30.6575	30.9078	30.6221	30.6925	30.7123	30.578	29.8212	30.8161	31.5451	30.6824	19	19	19	38.2	38.2	38.2	51.99	0	323.31	34523000000	207	9	17	16	14	14	12	13	18	16	17	17	0	0	0	0	0	1	0	0
P19221;CON__P00735	P19221	Prothrombin;Activation peptide fragment 1;Activation peptide fragment 2;Thrombin light chain;Thrombin heavy chain	F2	1.00832	0.0119527	0.970066	6	5	27.9574	27.3405	27.2223	27.458	27.3713	27.5958	27.5746	28.5328	27.0875	26.6386	27.6807	27	27	27	43.4	43.4	43.4	70.268	0	323.31	4261900000	163	14	22	22	17	19	16	16	26	22	19	21	0	0	0	0	0	0	1	0
Q9WUB3	Q9WUB3	Glycogen phosphorylase, muscle form	Pygm	0.984335	-0.0227792	0.971288	3	4	NaN	22.2034	22.5341	20.9675	NaN	NaN	NaN	22.6259	20.8936	22.304	21.692	10	10	8	14.7	14.7	11.4	97.285	0	29.003	68157000	10	1	5	6	4	1	1	1	7	3	6	2	0	0	0	0	0	0	1	0
Q61851;Q03142	Q61851;Q03142	Fibroblast growth factor receptor 3;Fibroblast growth factor receptor 4	Fgfr3;Fgfr4	1.00301	0.00433333	0.972895	5	3	NaN	21.4883	21.4038	21.3583	21.6241	21.7477	NaN	NaN	21.5308	21.7083	21.3473	2	2	2	3.2	3.2	3.2	87.757	0.0036101	3.138	45386000	6	1	2	2	2	2	2	1	1	2	2	2	0	0	1	0	0	0	0	0
O08842	O08842	GDNF family receptor alpha-2	Gfra2	0.993924	-0.008792	0.976374	5	5	23.7188	22.9437	22.803	23.5973	23.5394	NaN	23.7565	22.5129	23.478	23.203	23.6078	7	7	6	19.4	19.4	18.1	51.726	0	20.187	185000000	14	4	3	4	4	3	0	3	5	4	3	2	0	0	1	0	0	0	0	1
Q63836;P17563	Q63836;P17563	Selenium-binding protein 2;Selenium-binding protein 1	Selenbp2;Selenbp1	0.991489	-0.0123308	0.976628	6	4	22.6997	23.8115	23.4551	22.3978	23.1119	22.5506	22.2001	23.2306	22.6264	23.9113	NaN	8	8	8	22.9	22.9	22.9	52.609	0	26.643	162600000	25	4	6	6	4	6	6	3	6	5	6	1	1	1	1	0	0	0	0	0
P16294	P16294	Coagulation factor IX;Coagulation factor IXa light chain;Coagulation factor IXa heavy chain	F9	1.00454	0.0065325	0.979898	4	4	NaN	21.0409	NaN	21.5995	21.6899	22.0323	21.6368	21.9251	NaN	21.2425	21.5843	4	4	4	10.4	10.4	10.4	52.977	0	9.872	50635000	5	0	3	1	2	2	2	2	4	1	2	2	0	0	0	0	0	1	0	0
Q8R242	Q8R242	Di-N-acetylchitobiase	Ctbs	1.00203	0.00293	0.985308	6	3	22.8113	22.7879	22.9634	22.7608	23.1256	23.1418	NaN	22.5856	23.1043	NaN	23.1144	4	4	4	15.8	15.8	15.8	41.295	0	16.138	137430000	13	2	3	3	3	2	2	1	4	3	1	2	0	0	0	0	0	0	1	0
P29416	P29416	Beta-hexosaminidase subunit alpha	Hexa	0.994906	-0.007368	0.986186	6	5	22.4758	23.8283	24.3405	24.428	24.3509	24.8258	24.1481	23.2777	24.1181	24.2418	24.3851	7	7	7	15.2	15.2	15.2	60.612	0	24.949	340920000	27	3	6	4	5	5	3	3	4	4	7	7	0	0	0	0	0	0	1	0
Q61865	Q61865	Melanoma-derived growth regulatory protein	Mia	1.00527	0.00758667	0.986669	3	3	NaN	21.8688	22.5308	NaN	22.6568	NaN	22.661	21.6621	NaN	NaN	22.7561	2	2	2	14.6	14.6	14.6	14.593	0	4.2763	77179000	7	0	2	2	1	2	1	2	2	1	2	2	0	0	0	0	0	1	0	0
O89026	O89026	Roundabout homolog 1	Robo1	1.00016	0.000225333	0.999264	6	5	22.7448	23.0913	22.866	22.4195	22.8839	22.7148	23.0214	21.8569	23.1188	23.11	22.8277	9	9	9	8.1	8.1	8.1	176.4	0	19.337	143920000	17	2	5	6	3	6	2	6	6	7	6	5	0	0	1	0	0	0	0	0
Q9Z0M6	Q9Z0M6	CD97 antigen	Cd97	0.706979	-0.50026	NaN	4	2	NaN	20.6769	20.8069	20.5268	20.6309	NaN	NaN	NaN	20.2541	20.0662	NaN	2	2	2	2.7	2.7	2.7	90.412	0.002451	3.3813	20790000	9	1	2	2	2	2	1	1	1	2	2	1	0	0	1	0	0	0	0	0
Q8BTG6	Q8BTG6	UPF0454 protein C12orf49 homolog		0.38682	-1.37026	NaN	3	2	NaN	22.7683	22.8011	23.231	NaN	NaN	NaN	NaN	21.1533	NaN	21.9731	3	3	3	19	19	19	23.477	0	6.885	79263000	8	1	3	3	2	1	1	1	1	2	1	2	0	0	0	0	0	1	0	0
Q811B1	Q811B1	Xylosyltransferase 1	Xylt1	0.556317	-0.846021	NaN	5	2	23.4239	23.5273	22.6499	NaN	23.0847	23.3491	NaN	NaN	NaN	22.0715	22.6504	2	2	2	1.9	1.9	1.9	107.3	0	33.962	112300000	17	2	2	2	1	2	2	1	1	1	2	2	0	0	1	0	0	0	0	0
P54320	P54320	Elastin	Eln	0.651455	-0.618263	NaN	4	2	20.9637	21.3924	21.1031	20.88	NaN	NaN	NaN	NaN	20.7207	20.2124	NaN	3	3	3	5.5	5.5	5.5	71.937	0	5.3032	24635000	3	2	3	3	2	1	0	0	1	2	2	1	0	0	0	0	1	1	0	0
P47212	P47212	Galanin peptides;Galanin;Galanin message-associated peptide	Gal	0.384058	-1.3806	NaN	4	2	NaN	24.0234	NaN	23.6926	24.0508	24.8704	23.6286	21.9289	NaN	NaN	NaN	2	2	2	20.2	20.2	20.2	13.47	0	8.2063	193650000	10	1	2	1	2	2	2	2	2	1	1	1	0	0	0	0	0	1	0	0
P62827;Q61820	P62827;Q61820	GTP-binding nuclear protein Ran;GTP-binding nuclear protein Ran, testis-specific isoform	Ran;Rasl2-9	0.636967	-0.650708	NaN	3	2	NaN	22.0351	22.1534	NaN	NaN	22.0741	NaN	21.8745	NaN	20.9992	NaN	3	3	3	16.2	16.2	16.2	24.423	0	6.8485	41229000	4	0	2	2	0	1	2	0	3	1	2	0	1	1	0	0	0	0	0	0
Q8C522	Q8C522	Endonuclease domain-containing 1 protein	Endod1	0.813987	-0.296923	NaN	4	2	NaN	21.5843	NaN	21.5146	21.1718	21.7272	21.3461	NaN	NaN	21.0591	NaN	3	3	3	8.2	8.2	8.2	55.262	0	5.4928	28939000	4	1	3	1	2	2	3	3	0	1	2	1	0	0	0	0	0	1	0	0
P07141	P07141	Macrophage colony-stimulating factor 1;Processed macrophage colony-stimulating factor 1	Csf1	0.579035	-0.788277	NaN	3	2	NaN	NaN	22.6171	NaN	22.9191	23.3715	NaN	21.6328	NaN	NaN	22.7291	2	2	2	6.2	6.2	6.2	60.648	0	10.744	104780000	11	1	1	2	1	2	2	1	2	1	1	2	0	0	1	0	0	1	0	0
Q61554;Q61555	Q61554;Q61555	Fibrillin-1;Fibrillin-2	Fbn1;Fbn2	1.13259	0.179625	NaN	4	2	NaN	20.3376	NaN	20.5057	20.2594	20.3124	NaN	NaN	NaN	20.336	20.7307	2	2	2	0.9	0.9	0.9	312.3	0	4.5017	19599000	2	1	2	1	2	2	2	0	1	1	2	2	0	0	0	0	1	1	0	0
O35375	O35375	Neuropilin-2	Nrp2	0.807278	-0.308862	NaN	3	2	NaN	20.4369	19.9292	NaN	20.5855	NaN	NaN	NaN	20.1027	19.914	NaN	3	3	3	3.1	3.1	3.1	104.63	0.0033937	2.6199	13691000	4	0	2	2	1	2	0	1	0	2	3	1	0	0	1	0	0	0	0	0
Q8CI94;Q9ET01	Q8CI94	Glycogen phosphorylase, brain form	Pygb	0.585107	-0.773227	NaN	3	2	NaN	22.4697	22.742	NaN	NaN	21.7655	NaN	NaN	20.7213	22.3837	NaN	7	5	5	11.2	7.8	7.8	96.729	0	8.8587	41564000	8	0	5	5	0	0	3	0	1	3	5	0	0	0	0	0	0	0	1	0
Q9D0T7	Q9D0T7	Gastrokine-3	Gkn3	1.47463	0.560357	NaN	3	2	NaN	21.8045	20.8177	NaN	NaN	20.7423	22.1031	NaN	21.2606	NaN	NaN	2	2	2	17.3	17.3	17.3	20.772	0	9.4275	29428000	4	1	2	2	1	1	2	2	1	2	1	0	0	0	0	0	0	1	0	0
Q60854	Q60854	Serpin B6	Serpinb6	0.758478	-0.39882	NaN	3	2	NaN	21.9934	21.9751	NaN	NaN	21.1594	21.0346	NaN	NaN	21.5864	NaN	2	2	2	6.3	6.3	6.3	42.598	0	6.3869	34380000	6	2	2	2	1	1	2	2	1	0	2	1	1	0	0	0	0	0	0	0
Q91XY4	Q91XY4	Protocadherin gamma-A4	Pcdhga4	0.73548	-0.443242	NaN	3	2	NaN	NaN	20.8795	20.8379	NaN	21.9147	NaN	NaN	20.5838	NaN	20.9511	2	2	2	2.8	2.8	2.8	100.36	0.006424	2.0898	21956000	4	1	1	2	2	1	2	1	1	2	1	2	0	0	1	0	0	0	0	0
Q8R0A6	Q8R0A6	V-set and transmembrane domain-containing protein 2A	Vstm2a	0.846106	-0.24109	NaN	3	2	23.6477	NaN	23.6035	22.9712	NaN	NaN	NaN	NaN	23.1798	23.153	NaN	3	3	3	15.7	15.7	15.7	25.876	0	11.873	141960000	9	2	1	2	2	1	1	1	0	3	2	1	0	0	0	0	0	1	0	0
P26350	P26350	Prothymosin alpha;Prothymosin alpha, N-terminally processed;Thymosin alpha	Ptma	0.638858	-0.646433	NaN	3	2	NaN	23.3772	24.1089	NaN	NaN	23.7247	NaN	NaN	NaN	24.251	21.9301	4	4	4	35.1	35.1	35.1	12.254	0	11.6	122630000	11	0	3	4	0	1	2	1	1	0	4	3	0	1	0	0	0	0	0	0
Q9CQV8	Q9CQV8	14-3-3 protein beta/alpha;14-3-3 protein beta/alpha, N-terminally processed	Ywhab	0.783778	-0.351483	NaN	3	2	NaN	22.7756	23.1114	NaN	NaN	23.2326	NaN	22.0685	NaN	23.3083	NaN	5	3	3	22.4	15	15	28.086	0	9.886	87914000	8	1	3	3	1	1	2	1	3	1	2	1	1	0	0	0	0	0	0	0
P70349	P70349	Histidine triad nucleotide-binding protein 1	Hint1	0.848728	-0.236627	NaN	3	2	NaN	22.4466	22.775	NaN	NaN	22.7679	NaN	NaN	21.9855	22.8676	NaN	2	2	2	16.7	16.7	16.7	13.777	0	5.3154	69602000	6	1	2	2	1	1	2	1	1	2	2	1	1	1	0	0	0	0	0	0
P01631	P01631	Ig kappa chain V-II region 26-10		1.51658	0.600823	NaN	3	2	NaN	22.3438	NaN	23.6989	22.3547	NaN	22.3406	NaN	NaN	NaN	24.4594	3	3	3	17.7	17.7	17.7	12.273	0	7.4376	124040000	8	1	2	1	2	2	1	2	1	1	1	3	0	0	0	0	0	0	1	0
Q80WM4	Q80WM4	Hyaluronan and proteoglycan link protein 4	Hapln4	0.866143	-0.207323	NaN	4	2	22.4607	21.3694	21.6132	21.56	NaN	NaN	NaN	NaN	21.3154	21.7715	NaN	3	3	3	8	8	8	42.808	0	9.4811	52585000	10	2	3	2	2	1	1	1	0	3	3	1	0	0	0	0	1	1	0	0
Q8K4Q8	Q8K4Q8	Collectin-12	Colec12	0.919474	-0.12112	NaN	3	2	NaN	21.9004	22.5587	22.2984	NaN	NaN	NaN	NaN	21.8954	22.3673	NaN	2	2	2	3.6	3.6	3.6	81.303	0	8.6686	65307000	15	1	2	2	2	1	1	1	1	2	2	1	0	0	1	0	0	0	0	0
P70408	P70408	Cadherin-10	Cdh10	1.07218	0.100541	NaN	5	2	NaN	21.2251	21.6673	20.8748	21.7347	21.9949	21.6849	NaN	NaN	21.5148	NaN	3	3	3	5.3	5.3	5.3	88.311	0.0025907	3.8199	38979000	5	1	3	2	2	2	2	2	0	1	2	1	0	0	1	0	0	0	0	0
P58389	P58389	Serine/threonine-protein phosphatase 2A activator	Ppp2r4	1.11566	0.157893	NaN	3	2	NaN	20.3826	20.3446	19.6899	NaN	NaN	NaN	NaN	19.6713	20.9226	NaN	3	3	3	10.2	10.2	10.2	36.71	0.0025126	3.602	13595000	7	1	2	3	2	0	0	0	1	2	3	0	1	1	0	0	0	0	0	0
A2BIM8;P11588;P02762;P04938;B5X0G2;P11591	A2BIM8;P11588;P02762;P04938;B5X0G2	Major urinary protein 1;Major urinary protein 6;Major urinary proteins 11 and 8;Major urinary protein 17	Mup9;Mup1;Mup6;Mup8;Mup17	NaN	NaN	NaN	0	1	NaN	NaN	NaN	NaN	NaN	NaN	NaN	NaN	19.8947	NaN	NaN	7	1	1	44.8	8.8	8.8	20.762	0	4.3645	18857000	3	0	0	0	0	0	0	0	1	1	0	0	0	0	0	0	0	1	0	0
A6H6E2	A6H6E2	Multimerin-2	Mmrn2	NaN	NaN	NaN	0	1	NaN	NaN	NaN	NaN	NaN	NaN	NaN	NaN	NaN	NaN	21.4886	1	1	1	2.1	2.1	2.1	105.21	0.0044248	2.4237	55739000	7	1	1	1	1	1	1	1	1	1	1	1	0	0	0	0	1	1	0	0
E9Q414;CON__ENSEMBL:ENSBTAP00000032840	E9Q414	Apolipoprotein B-100;Apolipoprotein B-48	Apob	2.02966	1.02124	NaN	2	3	19.9376	NaN	NaN	NaN	20.0228	NaN	NaN	25.6943	18.4585	18.8516	NaN	26	26	26	7.9	7.9	7.9	509.43	0	57.392	170060000	25	2	0	0	1	2	1	0	26	2	2	1	1	0	0	0	0	1	0	0
E9Q557	E9Q557	Desmoplakin	Dsp	NaN	NaN	NaN	0	1	NaN	NaN	NaN	NaN	NaN	NaN	NaN	NaN	21.3695	NaN	NaN	2	2	2	0.9	0.9	0.9	332.91	0.0013228	4.0159	5998800	3	0	0	0	0	1	0	0	0	2	0	0	1	0	1	0	0	0	0	0
G3UZ78	G3UZ78	Androglobin	Adgb	NaN	NaN	NaN	0	1	NaN	NaN	NaN	NaN	NaN	NaN	NaN	20.7445	NaN	NaN	NaN	1	1	1	0.8	0.8	0.8	188.55	0.0064447	2.1034	5748500	1	0	0	0	0	0	0	0	1	0	0	0	0	0	0	0	0	0	1	0
O08545	O08545	Ephrin-A3	Efna3	NaN	NaN	NaN	0	1	NaN	NaN	NaN	NaN	NaN	NaN	NaN	NaN	NaN	NaN	21.7453	1	1	1	7	7	7	25.632	0	6.4156	69355000	9	1	1	1	1	1	1	1	1	1	1	1	0	0	1	0	0	0	0	1
O08665	O08665	Semaphorin-3A	Sema3a	NaN	NaN	NaN	0	1	NaN	NaN	NaN	NaN	NaN	NaN	NaN	NaN	NaN	20.2151	NaN	2	2	2	3	3	3	88.812	0.0084122	1.9616	9670700	2	0	1	1	1	1	1	1	0	1	2	1	0	0	0	0	0	1	0	0
O08746	O08746	Matrilin-2	Matn2	1.29443	0.37232	NaN	1	2	NaN	NaN	19.8274	NaN	NaN	NaN	NaN	NaN	NaN	20.2382	20.1613	2	2	2	3.2	3.2	3.2	106.75	0.0044793	2.5307	10094000	3	0	1	2	1	1	0	0	0	1	2	2	0	0	0	0	0	1	0	0
O08807	O08807	Peroxiredoxin-4	Prdx4	NaN	NaN	NaN	0	1	NaN	NaN	NaN	NaN	NaN	NaN	NaN	NaN	NaN	22.2293	NaN	2	1	1	6.9	4	4	31.052	0.0044053	2.3386	38897000	5	0	1	1	1	1	0	1	0	1	1	0	1	0	0	0	0	1	0	0
O35103	O35103	Osteomodulin	Omd	1.69493	0.761227	NaN	1	3	NaN	NaN	20.7661	NaN	NaN	NaN	NaN	21.431	NaN	22.1486	21.0024	3	3	3	11.3	11.3	11.3	49.745	0	6.0561	29958000	9	0	1	2	0	1	0	0	3	1	3	2	0	0	0	0	1	1	0	0
O35206	O35206	Collagen alpha-1(XV) chain;Restin	Col15a1	NaN	NaN	NaN	3	0	NaN	20.738	NaN	20.5715	20.9463	NaN	NaN	NaN	NaN	NaN	NaN	2	2	2	2.2	2.2	2.2	140.47	0	5.2348	10986000	2	0	2	1	2	2	0	0	0	0	1	0	0	0	0	0	1	1	0	0
O35930	O35930	Platelet glycoprotein Ib alpha chain	Gp1ba	NaN	NaN	NaN	0	1	NaN	NaN	NaN	NaN	NaN	NaN	NaN	22.1715	NaN	NaN	NaN	2	2	2	3.3	3.3	3.3	80.054	0.0054289	2.1731	27417000	2	0	1	0	1	1	1	0	2	1	0	1	0	0	1	0	0	0	0	0
O54819	O54819	Tissue factor pathway inhibitor	Tfpi	NaN	NaN	NaN	0	1	NaN	NaN	NaN	NaN	NaN	NaN	NaN	NaN	NaN	NaN	20.5214	1	1	1	6.9	6.9	6.9	34.986	0.0064378	2.1018	17595000	1	0	1	1	1	1	0	0	1	1	1	1	0	0	0	0	0	1	0	0
O54951	O54951	Semaphorin-6B	Sema6b	NaN	NaN	NaN	0	1	NaN	NaN	NaN	NaN	NaN	NaN	NaN	NaN	NaN	NaN	19.6228	2	2	2	2.6	2.6	2.6	95.466	0.0013245	4.0304	16808000	4	1	1	1	2	1	1	1	1	1	1	1	0	0	1	0	0	0	0	0
O54983	O54983	Ketimine reductase mu-crystallin	Crym	NaN	NaN	NaN	0	1	NaN	NaN	NaN	NaN	NaN	NaN	NaN	NaN	NaN	NaN	19.8644	1	1	1	5.1	5.1	5.1	33.523	0.0084477	2.0157	9746500	2	0	1	1	0	0	0	0	1	1	1	1	1	0	0	0	0	0	0	0
O55023	O55023	Inositol monophosphatase 1	Impa1	NaN	NaN	NaN	0	1	NaN	NaN	NaN	NaN	NaN	NaN	NaN	NaN	NaN	21.5767	NaN	2	2	2	8.7	8.7	8.7	30.436	0.0013123	3.9381	20740000	3	1	2	1	0	1	1	0	0	0	2	1	1	0	0	0	0	0	0	0
O55186	O55186	CD59A glycoprotein	Cd59a	NaN	NaN	NaN	0	1	NaN	NaN	NaN	NaN	NaN	NaN	NaN	NaN	NaN	NaN	21.1794	1	1	1	13.8	13.8	13.8	13.648	0	5.3093	34976000	3	0	1	1	1	0	1	1	0	1	1	1	0	0	1	0	0	0	0	1
O55188	O55188	Dentin matrix acidic phosphoprotein 1	Dmp1	1.63659	0.710695	NaN	1	2	NaN	NaN	NaN	26.5721	NaN	NaN	27.3289	27.2366	NaN	NaN	NaN	2	2	2	7.6	7.6	7.6	53.964	0.00358	3.0843	1598900000	2	1	1	0	2	1	0	2	2	1	1	1	1	1	0	0	1	1	0	0
O70165	O70165	Ficolin-1	Fcn1	NaN	NaN	NaN	0	2	NaN	NaN	NaN	NaN	NaN	NaN	NaN	NaN	20.5983	NaN	20.3235	2	2	2	7.8	7.8	7.8	36.298	0.0025445	3.6882	15365000	3	0	1	1	1	1	1	1	1	2	1	2	0	0	1	0	0	1	0	0
O88200	O88200	C-type lectin domain family 11 member A	Clec11a	NaN	NaN	NaN	0	2	NaN	NaN	NaN	NaN	NaN	NaN	NaN	21.1865	NaN	NaN	21.4886	2	2	2	6.1	6.1	6.1	36.451	0	4.9639	16921000	3	0	0	0	1	0	0	1	2	0	1	2	1	0	0	0	0	1	0	0
O88668	O88668	Protein CREG1	Creg1	1.28278	0.35927	NaN	1	2	NaN	NaN	NaN	20.5258	NaN	NaN	NaN	20.4419	NaN	21.3283	NaN	2	2	2	13.2	13.2	13.2	24.452	0.0025873	3.8065	18030000	4	0	1	1	2	1	0	0	2	1	2	1	0	0	0	0	0	1	0	0
P00493	P00493	Hypoxanthine-guanine phosphoribosyltransferase	Hprt1	NaN	NaN	NaN	0	1	NaN	NaN	NaN	NaN	NaN	NaN	NaN	NaN	NaN	NaN	19.6478	2	2	2	10.6	10.6	10.6	24.57	0.0044543	2.485	14702000	2	0	1	1	0	1	1	1	1	1	2	1	1	0	0	0	0	0	0	0
P00688	P00688	Pancreatic alpha-amylase	Amy2	NaN	NaN	NaN	0	1	NaN	NaN	NaN	NaN	NaN	NaN	NaN	NaN	NaN	NaN	18.829	5	1	1	13.2	3	3	57.318	0.0034924	2.8429	5696100	1	0	0	1	0	0	0	0	1	1	1	1	0	0	0	0	0	1	0	0
P01592	P01592	Immunoglobulin J chain	Igj	NaN	NaN	NaN	0	1	NaN	NaN	NaN	NaN	NaN	NaN	NaN	NaN	NaN	NaN	21.3149	1	1	1	9.4	9.4	9.4	18.013	0	5.7273	47874000	6	1	1	1	1	1	1	1	1	1	1	1	0	0	0	0	0	1	0	0
P01635	P01635	Ig kappa chain V-V region K2		NaN	NaN	NaN	0	1	NaN	NaN	NaN	NaN	NaN	NaN	NaN	NaN	NaN	NaN	20.5764	1	1	1	11.3	11.3	11.3	12.581	0	30.764	27932000	4	0	0	1	1	1	0	1	1	1	1	1	0	0	0	0	0	0	1	0
P01636	P01636	Ig kappa chain V-V region MOPC 149		NaN	NaN	NaN	0	1	NaN	NaN	NaN	NaN	NaN	NaN	NaN	NaN	NaN	NaN	22.2365	1	1	1	12	12	12	12.03	0	31.942	41290000	4	0	0	0	1	1	0	1	1	0	0	1	0	0	0	0	0	0	1	0
P01642	P01642	Ig kappa chain V-V region L7	Gm10881	NaN	NaN	NaN	0	2	NaN	NaN	NaN	NaN	NaN	NaN	NaN	21.4016	NaN	NaN	22.9212	2	2	2	23.5	23.5	23.5	12.615	0	13.362	21290000	5	0	0	0	0	0	0	0	2	1	0	2	0	0	0	0	0	0	1	0
P01645;P01644;P01646;P01647;P01643	P01645;P01644;P01646;P01647;P01643	Ig kappa chain V-V region HP 93G7;Ig kappa chain V-V region HP R16.7;Ig kappa chain V-V region HP 123E6;Ig kappa chain V-V region HP 124E1;Ig kappa chain V-V region MOPC 173		1.29527	0.37325	NaN	2	4	NaN	NaN	NaN	21.5475	21.1071	NaN	NaN	22.3976	21.3288	20.8677	22.2081	2	2	2	36.1	36.1	36.1	11.954	0	12.789	47151000	8	1	1	1	1	1	0	0	2	2	2	2	0	0	0	0	0	0	1	0
P01649;P01648	P01649;P01648	Ig kappa chain V-V regions;Ig kappa chain V-V region HP 91A3		NaN	NaN	NaN	0	1	NaN	NaN	NaN	NaN	NaN	NaN	19.4576	NaN	NaN	NaN	NaN	1	1	1	16.7	16.7	16.7	12.056	0.0035757	3.0816	8503300	1	0	1	0	1	1	0	1	0	0	0	0	0	0	0	0	0	0	1	0
P01674	P01674	Ig kappa chain V-III region PC 2154		NaN	NaN	NaN	0	1	NaN	NaN	NaN	NaN	NaN	NaN	NaN	NaN	NaN	NaN	23.1313	1	1	1	11.1	11.1	11.1	11.699	0	8.7498	38874000	2	0	0	0	0	0	0	0	1	0	0	1	0	0	0	0	0	0	1	0
P01679;P01678;P01677;P01676;P01675	P01679;P01678;P01677;P01676;P01675	Ig kappa chain V-VI region J539;Ig kappa chain V-VI region SAPC 10;Ig kappa chain V-VI region TEPC 601/TEPC 191;Ig kappa chain V-VI region XRPC 24;Ig kappa chain V-VI region XRPC 44		NaN	NaN	NaN	0	1	NaN	NaN	NaN	NaN	NaN	NaN	NaN	NaN	NaN	18.7604	NaN	1	1	1	16.8	16.8	16.8	11.502	0	5.6896	9045700	3	1	1	0	0	0	0	1	1	1	1	0	0	0	0	0	0	0	1	0
P01728;P01729;P01723;P01727;P01726	P01728;P01729;P01723;P01727;P01726	Ig lambda-2 chain V region;Ig lambda-2 chain V region MOPC 315;Ig lambda-1 chain V region;Ig lambda-1 chain V region S43;Ig lambda-1 chain V region H2020		NaN	NaN	NaN	0	1	NaN	NaN	NaN	NaN	NaN	NaN	NaN	23.8564	NaN	NaN	NaN	2	2	2	13.7	13.7	13.7	12.222	0.0044994	2.5717	63988000	3	0	0	0	0	0	1	1	2	0	0	1	0	0	0	0	0	0	1	0
P01750;P06328;P01754;P01753;P01748;P01751	P01750;P06328;P01754;P01753;P01748;P01751	Ig heavy chain V region 102;Ig heavy chain V region VH558 B4;Ig heavy chain V region 1-62-3;Ig heavy chain V region 186-1;Ig heavy chain V region 23;Ig heavy chain V region B1-8/186-2	Ighv1-62-3;Ighv1-72	NaN	NaN	NaN	0	1	NaN	NaN	NaN	NaN	NaN	NaN	NaN	22.3325	NaN	NaN	NaN	2	2	2	23.9	23.9	23.9	12.866	0	6.3268	22251000	2	0	0	0	0	0	0	0	2	1	1	1	0	0	0	0	0	0	1	0
P01783	P01783	Ig heavy chain V region MOPC 21		NaN	NaN	NaN	0	1	NaN	NaN	NaN	NaN	NaN	NaN	NaN	NaN	NaN	NaN	19.5214	1	1	1	8.1	8.1	8.1	15.071	0.0034803	2.8144	14996000	4	1	1	0	1	0	1	1	1	1	1	1	0	0	0	0	0	0	1	0
P01801;P01799;P01797;P01796;P01804;P01803;P01800;P01798;P01802	P01801;P01799;P01797;P01796	Ig heavy chain V-III region J606;Ig heavy chain V-III region ABE-47N;Ig heavy chain V-III region U61;Ig heavy chain V-III region A4		0.45993	-1.12051	NaN	1	2	NaN	NaN	NaN	NaN	22.1407	NaN	NaN	NaN	NaN	20.6785	21.3619	3	3	3	34.8	34.8	34.8	12.81	0	10.86	47913000	11	1	2	1	1	2	2	1	1	1	2	2	0	0	0	0	0	0	1	0
P01806;P01811;P01810;P01808;P01807	P01806;P01811;P01810;P01808;P01807	Ig heavy chain V region 441;Ig heavy chain V region UPC10;Ig heavy chain V region J539;Ig heavy chain V region T601;Ig heavy chain V region X44		NaN	NaN	NaN	1	0	NaN	21.3513	NaN	NaN	NaN	NaN	NaN	NaN	NaN	NaN	NaN	1	1	1	13.8	13.8	13.8	12.911	0.0013089	3.9327	5557700	2	0	1	0	0	0	1	0	0	0	0	0	0	0	0	0	0	0	1	0
P01843	P01843	Ig lambda-1 chain C region		NaN	NaN	NaN	0	1	NaN	NaN	NaN	NaN	NaN	NaN	NaN	NaN	NaN	NaN	21.1083	1	1	1	16.2	16.2	16.2	11.575	0.0083945	1.9513	37762000	3	1	1	1	1	1	1	1	1	1	1	1	0	0	0	0	0	0	1	0
P01844	P01844	Ig lambda-2 chain C region	Iglc2	NaN	NaN	NaN	0	1	NaN	NaN	NaN	NaN	NaN	NaN	NaN	23.8097	NaN	NaN	NaN	3	3	2	38.5	38.5	38.5	11.254	0	18.264	57022000	2	1	1	0	0	1	0	1	2	1	1	0	0	0	0	0	0	0	1	0
P01845	P01845	Ig lambda-3 chain C region	Iglc3	NaN	NaN	NaN	0	1	NaN	NaN	NaN	NaN	NaN	NaN	NaN	21.4395	NaN	NaN	NaN	2	1	1	30.8	14.4	14.4	11.371	0.0044944	2.5639	9306400	1	0	0	0	0	0	0	0	1	0	0	0	0	0	0	0	0	0	1	0
P01898;P01902	P01898	H-2 class I histocompatibility antigen, Q10 alpha chain	H2-Q10	1.06826	0.0952633	NaN	2	3	21.4187	NaN	NaN	NaN	20.4145	NaN	NaN	22.1418	NaN	19.9682	20.9256	4	4	2	14.2	14.2	6.8	37.251	0	6.7475	27760000	5	2	1	1	0	2	0	1	2	1	2	2	0	0	1	0	0	0	0	0
P02802	P02802	Metallothionein-1	Mt1	NaN	NaN	NaN	0	1	NaN	NaN	NaN	NaN	NaN	NaN	NaN	NaN	NaN	NaN	20.8612	1	1	1	19.7	19.7	19.7	6.0181	0.0035294	2.9237	50457000	10	1	1	1	1	1	1	1	1	1	1	1	0	0	0	0	0	0	1	0
P04117	P04117	Fatty acid-binding protein, adipocyte	Fabp4	0.783465	-0.35206	NaN	1	1	NaN	23.2245	NaN	NaN	NaN	NaN	NaN	22.8725	NaN	NaN	NaN	4	4	4	37.9	37.9	37.9	14.65	0	11.637	51411000	6	1	4	1	0	1	0	1	4	1	1	0	1	1	0	0	0	0	0	0
P04223;P14428;P01900;P03991;P01901;P06339;P14426;P01897;P14427	P04223;P14428;P01900;P03991;P01901	H-2 class I histocompatibility antigen, K-K alpha chain;H-2 class I histocompatibility antigen, K-Q alpha chain;H-2 class I histocompatibility antigen, D-D alpha chain;H-2 class I histocompatibility antigen, K-W28 alpha chain;H-2 class I histocompatibility antigen, K-B alpha chain	H2-K1;H2-D1	NaN	NaN	NaN	0	1	NaN	NaN	NaN	NaN	NaN	NaN	NaN	NaN	NaN	NaN	20.0833	3	3	1	7.3	7.3	3.8	41.646	0	6.2624	19840000	3	0	1	1	1	1	0	1	1	1	1	1	0	0	1	0	0	0	0	0
P04918	P04918	Serum amyloid A-3 protein	Saa3	NaN	NaN	NaN	0	1	NaN	NaN	NaN	NaN	NaN	NaN	NaN	NaN	NaN	22.3404	NaN	2	2	2	20.5	20.5	20.5	13.773	0.0013038	3.8881	13796000	2	0	0	0	0	0	0	0	1	0	2	1	0	0	0	0	0	1	0	0
P04939	P04939	Major urinary protein 3	Mup3	NaN	NaN	NaN	0	0	NaN	NaN	NaN	NaN	NaN	NaN	NaN	NaN	NaN	NaN	NaN	1	1	1	6	6	6	21.464	0.0053763	2.1103	0	1	0	0	0	0	1	0	0	0	0	0	0	0	0	0	0	0	1	0	0
P04945	P04945	Ig kappa chain V-VI region NQ2-6.1		NaN	NaN	NaN	0	1	NaN	NaN	NaN	NaN	NaN	NaN	NaN	NaN	NaN	NaN	18.661	1	1	1	14.8	14.8	14.8	11.713	0.0035419	2.9612	7788700	4	1	1	1	1	1	1	1	0	1	1	1	0	0	0	0	0	0	1	0
P05017	P05017	Insulin-like growth factor I	Igf1	NaN	NaN	NaN	0	2	NaN	NaN	NaN	NaN	NaN	NaN	NaN	22.9141	22.534	NaN	NaN	3	3	3	19	19	19	17.093	0	8.0103	73317000	6	1	0	1	1	1	1	0	2	3	1	1	0	0	0	0	0	1	0	0
P05208	P05208	Chymotrypsin-like elastase family member 2A	Cela2a	NaN	NaN	NaN	0	1	NaN	NaN	NaN	NaN	NaN	NaN	NaN	NaN	NaN	NaN	21.864	1	1	1	8.1	8.1	8.1	28.913	0	13.619	49360000	7	1	1	0	1	1	0	0	1	1	1	1	0	0	0	0	0	1	0	0
P05366	P05366	Serum amyloid A-1 protein	Saa1	3.01436	1.59185	NaN	1	5	NaN	NaN	23.7849	NaN	NaN	NaN	23.9589	28.7686	22.5218	26.5607	25.0736	7	7	5	48.4	48.4	33.6	13.77	0	217.61	1699900000	18	1	1	2	1	1	1	1	5	2	4	2	0	0	0	0	0	1	0	0
P05367	P05367	Serum amyloid A-2 protein;Amyloid protein A	Saa2	4.06352	2.02273	NaN	1	5	NaN	NaN	22.6131	NaN	NaN	NaN	23.9764	26.6048	22.5581	26.0135	24.0264	7	5	5	62.3	47.5	47.5	13.622	0	89.61	560530000	18	0	0	3	0	2	0	3	5	2	3	3	0	0	0	0	0	1	0	0
P05977	P05977	Myosin light chain 1/3, skeletal muscle isoform	Myl1	NaN	NaN	NaN	0	4	NaN	NaN	NaN	NaN	NaN	NaN	22.1126	20.6469	NaN	21.8565	22.6761	2	2	2	12.2	12.2	12.2	20.594	0	5.0389	31657000	6	0	0	0	1	1	0	2	2	0	2	2	0	0	0	0	0	0	1	0
P06879	P06879	Prolactin	Prl	NaN	NaN	NaN	0	1	NaN	NaN	NaN	NaN	NaN	NaN	NaN	24.2997	NaN	NaN	NaN	3	3	3	14.6	14.6	14.6	25.496	0	9.5481	67575000	3	0	0	0	0	0	0	0	3	0	0	0	0	0	0	0	0	1	0	0
P07743	P07743	BPI fold-containing family A member 2	Bpifa2	NaN	NaN	NaN	0	1	NaN	NaN	NaN	NaN	NaN	NaN	NaN	NaN	NaN	NaN	21.1056	1	1	1	6.8	6.8	6.8	24.753	0.0044593	2.4982	9578500	2	0	0	1	1	0	1	0	0	1	0	1	0	0	0	0	0	1	0	0
P07758;Q9CSN1	P07758	Alpha-1-antitrypsin 1-1	Serpina1a	NaN	NaN	NaN	0	1	NaN	NaN	NaN	NaN	NaN	NaN	NaN	23.1995	NaN	NaN	NaN	28	1	1	57.4	5.3	5.3	46.002	0	11.549	31521000	1	0	0	0	0	0	0	0	1	0	0	0	0	0	0	0	0	1	0	0
P08249	P08249	Malate dehydrogenase, mitochondrial	Mdh2	1.09166	0.126522	NaN	2	3	NaN	NaN	20.0439	19.6006	NaN	NaN	NaN	20.1728	NaN	20.0189	19.6547	2	2	2	8.9	8.9	8.9	35.611	0	4.6043	13769000	2	1	1	2	2	1	0	1	2	0	2	2	0	0	0	1	0	0	0	0
P09036	P09036	Serine protease inhibitor Kazal-type 3	Spink3	NaN	NaN	NaN	0	1	NaN	NaN	NaN	NaN	NaN	NaN	NaN	NaN	NaN	NaN	19.5732	2	2	2	25	25	25	8.4879	0.0044643	2.5049	15498000	2	0	1	1	1	1	1	0	0	0	1	1	0	0	0	0	0	1	0	0
P09671	P09671	Superoxide dismutase [Mn], mitochondrial	Sod2	NaN	NaN	NaN	0	1	NaN	NaN	NaN	NaN	NaN	NaN	NaN	NaN	NaN	NaN	21.0952	1	1	1	6.3	6.3	6.3	24.603	0	4.7247	27324000	5	1	1	1	1	0	1	0	0	1	1	1	0	0	0	1	0	0	0	0
P09803	P09803	Cadherin-1;E-Cad/CTF1;E-Cad/CTF2;E-Cad/CTF3	Cdh1	1.25407	0.326615	NaN	2	1	NaN	NaN	20.5193	21.3741	NaN	NaN	NaN	21.2733	NaN	NaN	NaN	2	2	2	2	2	2	98.255	0.0035545	3.0193	22604000	3	0	0	2	2	1	1	1	2	1	0	0	0	0	1	0	0	0	0	0
P0CW02	P0CW02	Lymphocyte antigen 6C1	Ly6c1	NaN	NaN	NaN	0	1	NaN	NaN	NaN	NaN	NaN	NaN	NaN	NaN	NaN	NaN	23.6224	1	1	1	13.7	13.7	13.7	14.192	0	7.6186	172420000	10	1	1	1	1	1	1	0	1	1	1	1	0	0	1	0	0	0	0	1
P10404	P10404	MLV-related proviral Env polyprotein;Surface protein;Transmembrane protein		1.89373	0.921232	NaN	1	5	NaN	22.4805	NaN	NaN	NaN	NaN	23.5498	22.0122	24.0521	23.1706	24.2238	6	6	6	11.7	11.7	11.7	69.612	0	25.452	116490000	11	0	3	1	0	1	0	5	2	3	3	4	0	0	1	0	0	0	0	0
P10630;P60843	P10630;P60843	Eukaryotic initiation factor 4A-II;Eukaryotic initiation factor 4A-II, N-terminally processed;Eukaryotic initiation factor 4A-I	Eif4a2;Eif4a1	0.737973	-0.43836	NaN	2	2	NaN	21.3115	21.8852	NaN	NaN	NaN	NaN	NaN	20.2957	22.0243	NaN	3	3	3	9.6	9.6	9.6	46.402	0	5.2427	25642000	8	0	3	3	1	1	0	0	2	2	3	0	0	0	0	0	0	0	1	0
P10639	P10639	Thioredoxin	Txn	0.913356	-0.130751	NaN	2	5	NaN	23.3045	23.9308	NaN	NaN	NaN	24.0648	22.5382	23.5933	24.143	23.0953	2	2	2	21	21	21	11.675	0	15.58	210840000	10	1	2	2	0	1	1	2	2	2	2	2	1	1	0	0	0	1	0	0
P11404	P11404	Fatty acid-binding protein, heart	Fabp3	1.00929	0.013334	NaN	1	5	NaN	NaN	NaN	NaN	NaN	21.7288	22.07	22.3292	21.2069	21.8479	21.2566	3	3	3	24.1	24.1	24.1	14.819	0	9.489	65049000	10	1	1	1	1	1	2	2	3	2	2	2	1	0	0	0	0	0	0	0
P11589	P11589	Major urinary protein 2	Mup2	NaN	NaN	NaN	0	1	NaN	NaN	NaN	NaN	NaN	NaN	NaN	21.2947	NaN	NaN	NaN	8	8	2	47.2	47.2	11.1	20.663	0	21.407	21019000	6	0	0	1	1	0	0	0	2	1	2	1	0	0	0	0	0	1	0	0
P12032	P12032	Metalloproteinase inhibitor 1	Timp1	NaN	NaN	NaN	0	3	NaN	NaN	NaN	NaN	NaN	NaN	NaN	NaN	20.1718	22.1208	22.2757	2	2	2	12.2	12.2	12.2	22.628	0.0034325	2.7598	26385000	3	1	0	1	1	1	1	1	0	2	2	2	0	0	0	0	0	1	0	0
P13634	P13634	Carbonic anhydrase 1	Ca1	NaN	NaN	NaN	0	1	NaN	NaN	NaN	NaN	NaN	NaN	NaN	22.0443	NaN	NaN	NaN	4	4	4	21.1	21.1	21.1	28.33	0	8.4369	16516000	4	0	0	0	1	0	0	1	4	0	1	0	1	0	0	0	0	0	0	0
P14094	P14094	Sodium/potassium-transporting ATPase subunit beta-1	Atp1b1	NaN	NaN	NaN	6	0	23.047	22.0668	21.6273	21.9943	22.6248	22.5727	NaN	NaN	NaN	NaN	NaN	2	2	2	7.6	7.6	7.6	35.194	0.0074786	2.0803	50265000	2	2	2	2	2	2	2	1	1	1	1	0	0	0	1	0	0	0	0	0
P14211	P14211	Calreticulin	Calr	0.904104	-0.14544	NaN	2	2	NaN	22.691	NaN	NaN	22.0058	NaN	NaN	NaN	22.1072	22.2987	NaN	2	2	2	6	6	6	47.994	0	5.7541	55648000	6	0	2	1	1	2	1	1	1	2	2	1	0	0	0	0	0	0	1	0
P14602	P14602	Heat shock protein beta-1	Hspb1	2.26119	1.17708	NaN	1	2	NaN	NaN	NaN	21.6596	NaN	NaN	NaN	22.7078	NaN	22.9655	NaN	3	3	3	20.6	20.6	20.6	23.014	0	13.389	55697000	8	0	1	1	2	1	1	1	3	0	3	0	1	1	0	0	0	0	0	0
P14847	P14847	C-reactive protein	Crp	NaN	NaN	NaN	0	5	NaN	NaN	NaN	NaN	NaN	NaN	21.9236	23.4941	21.0502	22.092	21.865	6	6	6	38.7	38.7	38.7	25.36	0	17.699	74657000	8	1	1	1	1	1	0	2	6	2	3	2	0	0	0	0	0	1	0	0
P15105	P15105	Glutamine synthetase	Glul	1.90573	0.930345	NaN	2	4	NaN	NaN	20.9399	NaN	20.6425	NaN	21.6889	21.273	21.2051	22.7191	NaN	6	6	6	21.4	21.4	21.4	42.119	0	10.921	40324000	8	0	1	2	1	2	0	3	2	3	6	1	1	0	0	1	0	0	0	0
P15327	P15327	Bisphosphoglycerate mutase	Bpgm	NaN	NaN	NaN	0	2	NaN	NaN	NaN	NaN	NaN	NaN	NaN	23.5846	NaN	20.8778	NaN	7	7	7	34	34	34	29.978	0	19.351	46809000	7	0	0	0	1	0	0	0	7	0	2	0	0	0	0	0	0	0	1	0
P15379	P15379	CD44 antigen	Cd44	NaN	NaN	NaN	0	1	NaN	NaN	NaN	NaN	NaN	NaN	NaN	NaN	NaN	NaN	21.9814	1	1	1	1.5	1.5	1.5	85.616	0.002457	3.4261	90479000	8	1	1	1	1	1	1	1	1	1	1	1	0	0	1	0	0	0	0	0
P15864	P15864	Histone H1.2	Hist1h1c	NaN	NaN	NaN	0	1	NaN	NaN	NaN	NaN	NaN	NaN	NaN	NaN	NaN	NaN	19.3117	1	1	1	7.5	7.5	7.5	21.266	0.0035047	2.8676	3389000	1	0	0	0	0	0	0	0	0	0	1	1	0	1	0	0	0	0	0	0
P16015	P16015	Carbonic anhydrase 3	Ca3	3.91632	1.9695	NaN	1	2	NaN	21.0053	NaN	NaN	NaN	NaN	NaN	26.2048	19.7447	NaN	NaN	11	11	11	62.3	62.3	62.3	29.366	0	82.567	264970000	14	0	4	1	1	1	0	1	11	2	1	1	1	0	0	0	0	0	0	0
P16460	P16460	Argininosuccinate synthase	Ass1	NaN	NaN	NaN	0	1	NaN	NaN	NaN	NaN	NaN	NaN	NaN	NaN	NaN	20.6021	NaN	1	1	1	3.2	3.2	3.2	46.584	0.0035006	2.8642	12410000	5	0	1	1	1	1	1	0	1	1	1	0	0	0	0	0	0	0	1	0
P16546	P16546	Spectrin alpha chain, non-erythrocytic 1	Sptan1	NaN	NaN	NaN	0	1	NaN	NaN	NaN	NaN	NaN	NaN	NaN	NaN	NaN	18.9643	NaN	1	1	1	0.4	0.4	0.4	284.59	0.0064309	2.0982	2195400	1	0	0	1	0	0	0	0	0	0	1	0	1	0	0	0	0	0	0	0
P17047	P17047	Lysosome-associated membrane glycoprotein 2	Lamp2	NaN	NaN	NaN	0	4	NaN	NaN	NaN	NaN	NaN	NaN	NaN	20.2591	20.1111	20.1166	20.1098	2	2	2	4.6	4.6	4.6	45.681	0.0025157	3.6072	17268000	4	1	0	1	1	1	0	1	2	2	2	2	0	0	1	0	0	0	0	0
P18337	P18337	L-selectin	Sell	NaN	NaN	NaN	0	1	NaN	NaN	NaN	NaN	NaN	NaN	NaN	19.927	NaN	NaN	NaN	1	1	1	3	3	3	42.288	0.0084656	2.0227	3573000	0	0	0	0	0	0	0	1	1	0	0	0	0	0	1	0	0	0	0	0
P18524;P18527;P18526	P18524;P18527;P18526	Ig heavy chain V region RF;Ig heavy chain V region 914;Ig heavy chain V region 345		NaN	NaN	NaN	0	1	NaN	NaN	NaN	NaN	NaN	NaN	NaN	20.6011	NaN	NaN	NaN	2	2	2	17.9	17.9	17.9	12.866	0.0036058	3.1256	19081000	2	0	1	0	0	0	0	1	2	1	0	1	0	0	0	0	0	0	1	0
P18525	P18525	Ig heavy chain V region 5-84		NaN	NaN	NaN	0	1	NaN	NaN	NaN	NaN	NaN	NaN	NaN	NaN	NaN	NaN	22.257	1	1	1	13.7	13.7	13.7	12.872	0	5.5272	61888000	8	1	0	1	1	0	1	1	1	1	1	1	0	0	0	0	0	0	1	0
P18528	P18528	Ig heavy chain V region 6.96		NaN	NaN	NaN	0	2	NaN	NaN	NaN	NaN	NaN	NaN	NaN	23.965	22.9755	NaN	NaN	1	1	1	19.4	19.4	19.4	11.007	0	8.9622	109420000	7	0	0	1	1	1	0	1	1	1	1	1	0	0	0	0	0	0	1	0
P18572	P18572	Basigin	Bsg	NaN	NaN	NaN	0	1	NaN	NaN	NaN	NaN	NaN	NaN	NaN	NaN	NaN	NaN	22.4957	1	1	1	3.3	3.3	3.3	42.444	0.0013141	3.9831	107610000	6	1	1	1	1	1	1	1	1	0	1	1	0	0	1	0	0	0	0	0
P21550	P21550	Beta-enolase	Eno3	18.3829	4.20029	NaN	1	1	NaN	NaN	NaN	22.3534	NaN	NaN	NaN	26.5537	NaN	NaN	NaN	20	16	15	57.4	48.8	47	47.024	0	60.925	335230000	18	1	1	0	3	0	0	1	15	1	0	0	1	0	0	0	0	0	0	0
P23492	P23492	Purine nucleoside phosphorylase	Pnp	1.0326	0.046285	NaN	2	1	NaN	21.9191	21.7374	NaN	NaN	NaN	NaN	21.8745	NaN	NaN	NaN	3	3	3	15.2	15.2	15.2	32.277	0	5.2437	30247000	3	0	3	3	0	1	1	1	3	0	1	0	1	0	0	0	0	0	0	0
P24369	P24369	Peptidyl-prolyl cis-trans isomerase B	Ppib	NaN	NaN	NaN	2	0	NaN	21.1703	NaN	20.8241	NaN	NaN	NaN	NaN	NaN	NaN	NaN	2	2	2	11.1	11.1	11.1	23.713	0	4.3075	20960000	4	1	2	1	2	1	1	1	1	1	1	0	0	0	0	0	0	0	1	0
P24527	P24527	Leukotriene A-4 hydrolase	Lta4h	0.925664	-0.11144	NaN	1	2	NaN	NaN	21.55	NaN	NaN	NaN	NaN	20.7398	NaN	22.1374	NaN	3	3	3	6.7	6.7	6.7	69.05	0.0024907	3.5643	21696000	4	0	1	3	0	0	1	0	2	0	3	0	1	0	0	0	0	0	0	0
P26645	P26645	Myristoylated alanine-rich C-kinase substrate	Marcks	NaN	NaN	NaN	0	1	NaN	NaN	NaN	NaN	NaN	NaN	NaN	NaN	NaN	NaN	19.8562	1	1	1	6.1	6.1	6.1	29.661	0.0044893	2.5548	25206000	6	1	0	1	1	1	1	1	1	1	1	1	1	0	1	0	0	0	0	0
P26928	P26928	Hepatocyte growth factor-like protein;Hepatocyte growth factor-like protein alpha chain;Hepatocyte growth factor-like protein beta chain	Mst1	NaN	NaN	NaN	0	1	NaN	NaN	NaN	NaN	NaN	NaN	NaN	NaN	NaN	18.5433	NaN	1	1	1	2	2	2	80.618	0	5.2228	18138000	4	1	1	0	1	1	1	1	1	1	1	0	0	0	0	0	0	1	0	0
P27046	P27046	Alpha-mannosidase 2	Man2a1	0.861748	-0.214662	NaN	1	4	NaN	20.8988	NaN	NaN	NaN	NaN	20.6478	NaN	20.252	20.7588	21.078	3	3	3	3.1	3.1	3.1	131.63	0	11.427	18914000	6	1	3	1	1	0	0	2	0	2	3	2	0	0	1	0	0	0	0	0
P28652;P11798;Q6PHZ2;Q923T9	P28652;P11798;Q6PHZ2;Q923T9	Calcium/calmodulin-dependent protein kinase type II subunit beta;Calcium/calmodulin-dependent protein kinase type II subunit alpha;Calcium/calmodulin-dependent protein kinase type II subunit delta;Calcium/calmodulin-dependent protein kinase type II subunit gamma	Camk2b;Camk2a;Camk2d;Camk2g	0.982419	-0.02559	NaN	2	2	NaN	NaN	21.47	NaN	NaN	21.625	21.6596	NaN	NaN	NaN	21.3843	2	2	2	4.2	4.2	4.2	60.46	0	4.6853	39283000	10	1	1	2	1	1	2	2	1	1	1	2	1	0	1	0	0	0	0	0
P28666	P28666	Murinoglobulin-2	Mug2	NaN	NaN	NaN	0	1	NaN	NaN	NaN	NaN	NaN	NaN	NaN	20.2856	NaN	NaN	NaN	27	1	1	20.6	1	1	162.38	0.0025575	3.7037	6978700	1	1	0	0	1	0	0	0	1	0	0	0	0	0	0	0	0	1	0	0
P30275;Q6P8J7	P30275;Q6P8J7	Creatine kinase U-type, mitochondrial;Creatine kinase S-type, mitochondrial	Ckmt1;Ckmt2	NaN	NaN	NaN	0	1	NaN	NaN	NaN	NaN	NaN	NaN	NaN	NaN	NaN	19.3693	NaN	1	1	1	3.8	3.8	3.8	47.003	0.0093848	1.8884	5475000	4	0	0	1	0	0	0	0	1	1	1	0	0	0	1	1	0	0	0	0
P30412	P30412	Peptidyl-prolyl cis-trans isomerase C	Ppic	NaN	NaN	NaN	1	0	NaN	NaN	20.3917	NaN	NaN	NaN	NaN	NaN	NaN	NaN	NaN	2	2	2	11.8	11.8	11.8	22.794	0.0043716	2.282	11515000	4	1	1	2	1	1	0	1	1	1	1	1	1	0	0	0	0	0	0	0
P31532	P31532	Serum amyloid A-4 protein	Saa4	5.46632	2.45057	NaN	2	2	NaN	NaN	NaN	NaN	21.6465	21.0331	NaN	25.8977	NaN	21.683	NaN	7	7	7	46.9	46.9	46.9	15.088	0	282.71	232450000	10	1	1	1	0	3	2	1	7	1	2	1	0	0	0	0	0	1	0	0
P35455	P35455	Vasopressin-neurophysin 2-copeptin;Arg-vasopressin;Neurophysin 2;Copeptin	Avp	0.989907	-0.014635	NaN	1	2	NaN	NaN	NaN	22.6033	NaN	NaN	NaN	NaN	NaN	22.991	22.1864	5	5	3	53	53	25.6	17.899	0	14.114	110760000	11	1	1	1	2	2	2	1	1	1	2	2	0	0	0	0	0	1	0	0
P35546	P35546	Proto-oncogene tyrosine-protein kinase receptor Ret;Soluble RET kinase fragment;Extracellular cell-membrane anchored RET cadherin 120 kDa fragment	Ret	0.919254	-0.121465	NaN	2	1	NaN	21.0309	21.5208	NaN	NaN	NaN	NaN	NaN	21.1544	NaN	NaN	2	2	2	2.5	2.5	2.5	123.87	0	4.5378	29684000	5	1	2	2	1	1	1	1	1	2	1	1	0	0	1	0	0	0	0	0
P35802	P35802	Neuronal membrane glycoprotein M6-a	Gpm6a	NaN	NaN	NaN	3	0	22.7447	22.3876	NaN	21.8733	NaN	NaN	NaN	NaN	NaN	NaN	NaN	2	2	2	5	5	5	31.149	0.0036145	3.138	32964000	2	2	2	1	2	1	1	1	1	1	1	1	0	0	1	0	0	0	0	0
P39039	P39039	Mannose-binding protein A	Mbl1	NaN	NaN	NaN	0	1	NaN	NaN	NaN	NaN	NaN	NaN	NaN	20.912	NaN	NaN	NaN	1	1	1	3.8	3.8	3.8	25.396	0.0084926	2.0293	6456000	1	0	0	0	0	0	0	0	1	0	0	0	0	0	0	0	0	1	0	0
P39098	P39098	Mannosyl-oligosaccharide 1,2-alpha-mannosidase IB	Man1a2	0.251397	-1.99196	NaN	1	1	NaN	22.2825	NaN	NaN	NaN	NaN	NaN	NaN	20.2905	NaN	NaN	2	2	2	3.7	3.7	3.7	72.871	0.0025189	3.617	38245000	6	1	2	1	1	1	1	1	1	2	1	1	0	0	1	0	0	0	0	0
P40224	P40224	Stromal cell-derived factor 1	Cxcl12	NaN	NaN	NaN	0	1	NaN	NaN	NaN	NaN	NaN	NaN	NaN	NaN	20.3904	NaN	NaN	1	1	1	15.1	15.1	15.1	10.561	0.0084034	1.9554	9811900	1	0	1	1	1	1	0	0	0	1	0	0	0	0	0	0	0	1	0	0
P40936	P40936	Indolethylamine N-methyltransferase	Inmt	NaN	NaN	NaN	0	1	NaN	NaN	NaN	NaN	NaN	NaN	NaN	NaN	NaN	19.2911	NaN	2	2	2	11	11	11	29.459	0	5.5118	8166200	2	0	0	0	0	1	0	0	2	0	1	0	1	0	0	0	0	0	0	0
P41234	P41234	ATP-binding cassette sub-family A member 2	Abca2	NaN	NaN	NaN	0	1	NaN	NaN	NaN	NaN	NaN	NaN	NaN	NaN	NaN	NaN	20.4236	1	1	1	0.4	0.4	0.4	270.51	0.0053996	2.1335	26235000	7	1	1	1	1	1	1	0	0	1	1	1	0	0	1	0	0	0	0	0
P41539	P41539	Protachykinin-1;Substance P;Neurokinin A;Neuropeptide K;Neuropeptide gamma;C-terminal-flanking peptide	Tac1	NaN	NaN	NaN	0	1	NaN	NaN	NaN	NaN	NaN	NaN	NaN	NaN	NaN	NaN	23.6034	1	1	1	10	10	10	15.045	0	4.1974	212160000	12	1	1	1	1	1	0	0	1	1	1	1	0	0	0	0	0	1	0	0
P43006	P43006	Excitatory amino acid transporter 2	Slc1a2	NaN	NaN	NaN	0	1	NaN	NaN	NaN	NaN	NaN	NaN	NaN	NaN	NaN	20.9489	NaN	1	1	1	2.3	2.3	2.3	62.03	0.0043764	2.3079	10576000	2	0	1	1	0	0	1	0	0	1	1	0	0	0	1	0	0	0	0	0
P43274	P43274	Histone H1.4	Hist1h1e	NaN	NaN	NaN	0	1	NaN	NaN	NaN	NaN	NaN	NaN	NaN	NaN	NaN	NaN	19.7876	1	1	1	7.3	7.3	7.3	21.977	0.0034965	2.8618	1392000	1	0	0	0	0	0	0	0	0	0	0	1	0	1	0	0	0	0	0	0
P45377	P45377	Aldose reductase-related protein 2	Akr1b8	NaN	NaN	NaN	0	1	NaN	NaN	NaN	NaN	NaN	NaN	NaN	NaN	NaN	21.0797	NaN	1	1	1	4.4	4.4	4.4	36.12	0.0013175	3.9957	20080000	3	0	1	1	0	0	1	0	1	1	1	0	1	0	0	0	0	0	0	0
P48356	P48356	Leptin receptor	Lepr	NaN	NaN	NaN	4	0	NaN	19.9298	NaN	20.4529	20.3367	20.4237	NaN	NaN	NaN	NaN	NaN	2	2	2	2	2	2	130.79	0.0085106	2.0306	10519000	1	0	2	1	2	2	2	1	0	1	0	0	0	0	1	0	0	1	0	0
P48758	P48758	Carbonyl reductase [NADPH] 1	Cbr1	0.857905	-0.22111	NaN	1	1	NaN	NaN	21.8715	NaN	NaN	NaN	NaN	NaN	NaN	21.6504	NaN	2	2	2	9	9	9	30.641	0	6.0271	19475000	5	0	1	2	0	0	0	0	1	1	2	0	1	0	0	0	0	0	0	0
P49183	P49183	Deoxyribonuclease-1	Dnase1	NaN	NaN	NaN	0	1	NaN	NaN	NaN	NaN	NaN	NaN	NaN	NaN	NaN	NaN	18.7623	1	1	1	3.5	3.5	3.5	32.027	0.001321	4.0145	9383200	1	0	0	0	1	1	0	1	0	0	1	1	0	1	0	0	0	1	0	0
P49935	P49935	Pro-cathepsin H;Cathepsin H mini chain;Cathepsin H;Cathepsin H heavy chain;Cathepsin H light chain	Ctsh	1.87279	0.90519	NaN	2	2	NaN	21.339	NaN	NaN	NaN	20.5295	NaN	NaN	NaN	22.1447	21.5341	2	2	2	9	9	9	37.17	0	4.917	33094000	6	0	2	1	0	1	2	0	1	1	2	2	0	0	0	0	0	0	1	0
P50114	P50114	Protein S100-B	S100b	NaN	NaN	NaN	0	1	NaN	NaN	NaN	NaN	NaN	NaN	NaN	NaN	NaN	NaN	19.2432	1	1	1	16.3	16.3	16.3	10.728	0	5.9851	34365000	3	0	1	1	0	0	0	0	1	1	1	1	1	1	0	0	0	0	0	0
P50247	P50247	Adenosylhomocysteinase	Ahcy	0.644231	-0.63435	NaN	2	2	NaN	22.4125	22.7817	NaN	NaN	NaN	NaN	22.0227	21.9029	NaN	NaN	3	3	3	8.6	8.6	8.6	47.688	0	7.2847	54398000	6	1	3	3	1	0	0	0	2	3	1	1	1	0	0	0	0	0	0	0
P51569	P51569	Alpha-galactosidase A	Gla	NaN	NaN	NaN	0	1	NaN	NaN	NaN	NaN	NaN	NaN	NaN	NaN	NaN	NaN	20.121	1	1	1	2.9	2.9	2.9	47.642	0.0044346	2.4646	11903000	1	0	1	0	1	0	1	1	0	1	1	1	0	0	0	0	0	0	1	0
P51880	P51880	Fatty acid-binding protein, brain	Fabp7	NaN	NaN	NaN	0	1	NaN	NaN	NaN	NaN	NaN	NaN	NaN	NaN	NaN	21.4008	NaN	1	1	1	9.1	9.1	9.1	14.893	0.0033898	2.6124	11172000	1	0	0	1	0	0	0	0	0	1	1	0	1	0	0	0	0	0	0	0
P52760	P52760	Ribonuclease UK114	Hrsp12	0.486311	-1.04005	NaN	1	1	NaN	NaN	NaN	NaN	NaN	21.9624	NaN	20.9223	NaN	NaN	NaN	2	2	2	19.3	19.3	19.3	14.255	0	4.9361	35485000	8	1	1	1	1	1	2	1	2	1	1	1	0	0	0	0	0	0	1	0
P52800	P52800	Ephrin-B2	Efnb2	1.26042	0.333905	NaN	2	2	NaN	21.0814	20.4849	NaN	NaN	NaN	NaN	NaN	NaN	21.2564	20.9777	2	2	2	9.2	9.2	9.2	37.202	0.0034562	2.7864	23311000	4	1	2	2	1	0	1	0	1	1	2	2	0	0	1	0	0	0	0	0
P54279	P54279	Mismatch repair endonuclease PMS2	Pms2	NaN	NaN	NaN	0	1	NaN	NaN	NaN	NaN	NaN	NaN	NaN	NaN	NaN	NaN	25.5855	1	1	1	1.9	1.9	1.9	95.224	0.0034247	2.6933	975730000	13	1	1	1	1	1	1	1	1	1	1	1	0	1	0	0	0	0	0	0
P54763	P54763	Ephrin type-B receptor 2	Ephb2	NaN	NaN	NaN	0	1	NaN	NaN	NaN	NaN	NaN	NaN	NaN	NaN	NaN	NaN	19.0865	1	1	1	1.8	1.8	1.8	109.9	0	7.479	7513400	2	0	1	1	0	0	0	0	1	1	1	1	0	0	1	0	0	0	0	0
P55002	P55002	Microfibrillar-associated protein 2	Mfap2	NaN	NaN	NaN	0	1	NaN	NaN	NaN	NaN	NaN	NaN	NaN	NaN	NaN	NaN	21.0061	1	1	1	5.5	5.5	5.5	20.578	0	4.2228	51822000	6	1	1	1	1	1	1	1	1	1	1	1	0	0	0	0	1	1	0	0
P55012	P55012	Solute carrier family 12 member 2	Slc12a2	NaN	NaN	NaN	0	1	NaN	NaN	NaN	NaN	NaN	NaN	NaN	NaN	NaN	19.3642	NaN	1	1	1	1.7	1.7	1.7	131.03	0	8.7207	9042600	4	0	1	1	1	1	1	1	0	1	1	0	0	0	1	0	0	0	0	0
P55088	P55088	Aquaporin-4	Aqp4	NaN	NaN	NaN	0	1	NaN	NaN	NaN	NaN	NaN	NaN	NaN	NaN	NaN	21.6332	NaN	1	1	1	3.1	3.1	3.1	34.436	0.0044297	2.429	11126000	2	0	0	1	0	0	0	0	0	1	1	0	0	0	1	0	0	0	0	0
P55099	P55099	Tachykinin-3;Neurokinin-B	Tac3	NaN	NaN	NaN	0	1	NaN	NaN	NaN	NaN	NaN	NaN	NaN	NaN	NaN	NaN	22.1322	1	1	1	12.1	12.1	12.1	12.737	0.0093555	1.8787	31897000	2	0	1	1	1	0	0	0	1	0	1	1	0	0	0	0	0	1	0	0
P55850	P55850	Desmocollin-3	Dsc3	NaN	NaN	NaN	0	1	NaN	NaN	NaN	NaN	NaN	NaN	NaN	NaN	NaN	NaN	21.1225	1	1	1	1.9	1.9	1.9	100.2	0.008377	1.9389	12984000	2	0	0	0	0	1	0	0	1	1	1	1	0	0	1	0	0	0	0	0
P56375	P56375	Acylphosphatase-2	Acyp2	1.14632	0.19701	NaN	2	4	NaN	NaN	20.7762	20.4137	NaN	NaN	NaN	20.4549	20.7247	21.5169	20.4713	3	3	3	36.8	36.8	36.8	11.877	0	7.9545	29708000	4	1	1	2	2	1	1	1	2	3	2	2	0	0	0	0	0	0	1	0
P57780	P57780	Alpha-actinin-4	Actn4	0.847916	-0.238007	NaN	1	3	NaN	20.5226	NaN	NaN	NaN	NaN	19.7322	20.902	NaN	20.2195	NaN	3	3	3	4.7	4.7	4.7	104.98	0.001328	4.0538	14018000	3	0	3	0	0	0	0	2	3	0	2	1	1	1	0	0	0	0	0	0
P58252	P58252	Elongation factor 2	Eef2	0.698976	-0.516685	NaN	2	2	NaN	21.7159	21.2979	NaN	NaN	NaN	NaN	20.9237	NaN	21.0568	NaN	3	3	3	4.1	4.1	4.1	95.313	0	5.7353	24817000	6	1	3	3	0	1	1	0	2	1	3	0	1	1	0	0	0	0	0	0
P60041	P60041	Somatostatin;Antrin;Somatostatin-28;Somatostatin-14	Sst	NaN	NaN	NaN	0	1	NaN	NaN	NaN	NaN	NaN	NaN	NaN	NaN	NaN	NaN	23.2249	1	1	1	9.5	9.5	9.5	12.745	0.0013072	3.9267	218340000	5	1	1	1	1	1	1	1	1	1	1	1	0	0	0	0	0	1	0	0
P60487	P60487	Pyridoxal phosphate phosphatase	Pdxp	NaN	NaN	NaN	0	3	NaN	NaN	NaN	NaN	NaN	NaN	NaN	NaN	20.8121	21.0745	20.482	2	2	2	10.3	10.3	10.3	31.512	0.0025221	3.6249	19072000	5	1	2	1	1	1	1	1	0	2	2	2	1	0	1	0	0	0	0	0
P60710;Q8BFZ3	P60710	Actin, cytoplasmic 1;Actin, cytoplasmic 1, N-terminally processed	Actb	NaN	NaN	NaN	0	1	NaN	NaN	NaN	NaN	NaN	NaN	NaN	NaN	NaN	NaN	21.1557	22	1	1	64.5	4.5	4.5	41.736	0	7.8366	76461000	15	1	1	1	1	1	0	1	1	1	1	1	1	0	0	0	0	0	0	0
P60766;P84096;P60764;Q8R527;Q9ER71	P60766;P84096;P60764;Q8R527;Q9ER71	Cell division control protein 42 homolog;Rho-related GTP-binding protein RhoG;Ras-related C3 botulinum toxin substrate 3;Rho-related GTP-binding protein RhoQ;Rho-related GTP-binding protein RhoJ	Cdc42;Rhog;Rac3;Rhoq;Rhoj	NaN	NaN	NaN	0	1	NaN	NaN	NaN	NaN	NaN	NaN	NaN	19.1927	NaN	NaN	NaN	2	1	1	16.8	11	11	21.258	0.0085379	2.0383	1960800	1	0	0	0	0	0	0	0	1	0	0	0	1	0	1	0	0	0	0	0
P61027;Q9D1G1;Q9DD03;P61028;P55258;Q8K386	P61027;Q9D1G1;Q9DD03;P61028;P55258;Q8K386	Ras-related protein Rab-10;Ras-related protein Rab-1B;Ras-related protein Rab-13;Ras-related protein Rab-8B;Ras-related protein Rab-8A;Ras-related protein Rab-15	Rab10;Rab1b;Rab13;Rab8b;Rab8a;Rab15	NaN	NaN	NaN	0	1	NaN	NaN	NaN	NaN	NaN	NaN	NaN	NaN	NaN	19.4356	NaN	2	2	1	11	11	5.5	22.541	0.0035253	2.9071	3886000	2	0	1	0	0	0	0	0	1	1	1	0	1	0	1	0	0	0	0	0
P61089	P61089	Ubiquitin-conjugating enzyme E2 N	Ube2n	NaN	NaN	NaN	0	1	NaN	NaN	NaN	NaN	NaN	NaN	NaN	NaN	NaN	NaN	17.7464	1	1	1	13.2	13.2	13.2	17.138	0.0084567	2.0175	10401000	1	1	1	1	1	0	0	1	1	1	1	1	1	1	0	0	0	0	0	0
P61939	P61939	Thyroxine-binding globulin	Serpina7	3.29401	1.71985	NaN	1	2	NaN	NaN	NaN	NaN	20.3955	NaN	NaN	22.7397	NaN	21.491	NaN	2	2	2	7.2	7.2	7.2	47.052	0	11.039	35378000	3	1	1	1	1	2	0	0	2	0	2	1	0	0	0	0	0	1	0	0
P61957;Q9Z172	P61957;Q9Z172	Small ubiquitin-related modifier 2;Small ubiquitin-related modifier 3	Sumo2;Sumo3	NaN	NaN	NaN	0	1	NaN	NaN	NaN	NaN	NaN	NaN	NaN	NaN	NaN	NaN	20.6317	1	1	1	12.6	12.6	12.6	10.871	0.002445	3.3482	36588000	6	0	1	1	1	1	1	0	1	0	1	1	1	1	0	0	0	0	0	0
P62774	P62774	Myotrophin	Mtpn	NaN	NaN	NaN	0	1	NaN	NaN	NaN	NaN	NaN	NaN	NaN	NaN	NaN	21.5182	NaN	1	1	1	14.4	14.4	14.4	12.861	0	5.5257	22210000	2	1	1	1	1	1	1	1	0	1	1	0	1	1	0	0	0	0	0	0
P63001;Q05144	P63001;Q05144	Ras-related C3 botulinum toxin substrate 1;Ras-related C3 botulinum toxin substrate 2	Rac1;Rac2	0.66124	-0.596755	NaN	1	2	NaN	NaN	22.3552	NaN	NaN	NaN	NaN	21.3009	NaN	22.216	NaN	3	3	2	19.3	19.3	13.5	21.45	0	7.2254	40021000	5	1	1	2	1	1	0	0	2	1	2	1	1	0	1	0	0	0	0	0
P63038	P63038	60 kDa heat shock protein, mitochondrial	Hspd1	NaN	NaN	NaN	0	1	NaN	NaN	NaN	NaN	NaN	NaN	19.6347	NaN	NaN	NaN	NaN	1	1	1	3	3	3	60.955	0	4.6141	6952700	1	1	0	0	0	0	0	1	0	0	0	0	0	0	0	1	0	0	0	0
P63054	P63054	Purkinje cell protein 4	Pcp4	1.29562	0.37364	NaN	1	1	NaN	NaN	NaN	NaN	20.9454	NaN	NaN	NaN	NaN	21.319	NaN	2	2	2	41.9	41.9	41.9	6.8073	0.0043908	2.3203	30767000	3	1	1	1	1	2	1	1	1	0	2	1	0	0	0	0	0	0	1	0
P63089	P63089	Pleiotrophin	Ptn	1.65192	0.72414	NaN	1	2	NaN	NaN	NaN	20.2844	NaN	NaN	NaN	20.7678	21.2493	NaN	NaN	2	2	2	15.5	15.5	15.5	18.869	0.0034443	2.7799	18705000	3	0	1	1	2	1	1	1	2	2	0	0	0	0	0	0	0	1	0	0
Q8BGY2;P63242	Q8BGY2;P63242	Eukaryotic translation initiation factor 5A-2;Eukaryotic translation initiation factor 5A-1	Eif5a2;Eif5a	NaN	NaN	NaN	0	1	NaN	NaN	NaN	NaN	NaN	NaN	NaN	NaN	NaN	NaN	18.4079	1	1	1	7.8	7.8	7.8	16.793	0.0084836	2.0277	11804000	3	1	1	1	1	1	0	0	1	0	1	1	1	1	1	0	0	0	0	0
P63254	P63254	Cysteine-rich protein 1	Crip1	NaN	NaN	NaN	1	0	NaN	22.4646	NaN	NaN	NaN	NaN	NaN	NaN	NaN	NaN	NaN	2	2	2	49.4	49.4	49.4	8.5497	0.0034682	2.7981	37941000	3	1	2	1	1	1	0	1	1	1	1	1	0	0	0	0	0	0	1	0
P63260	P63260	Actin, cytoplasmic 2;Actin, cytoplasmic 2, N-terminally processed	Actg1	NaN	NaN	NaN	0	1	NaN	NaN	NaN	NaN	NaN	NaN	NaN	NaN	NaN	21.5542	NaN	22	22	1	64.5	64.5	4.5	41.792	0	176.95	54203000	15	1	1	1	1	1	1	0	1	1	1	0	1	0	0	0	0	0	0	0
P68368	P68368	Tubulin alpha-4A chain	Tuba4a	NaN	NaN	NaN	1	0	NaN	NaN	21.1397	NaN	NaN	NaN	NaN	NaN	NaN	NaN	NaN	9	3	2	31.2	8.7	5.6	49.924	0	7.3425	7892900	3	0	0	2	0	0	0	0	1	1	1	0	1	0	0	0	0	0	0	0
P68369;P05214	P68369;P05214	Tubulin alpha-1A chain;Tubulin alpha-3 chain	Tuba1a;Tuba3a	NaN	NaN	NaN	0	1	NaN	NaN	NaN	NaN	NaN	NaN	NaN	NaN	NaN	19.409	NaN	12	12	1	40.4	40.4	3.1	50.135	0	99.268	6115600	2	0	1	1	0	0	0	0	1	1	1	0	1	0	0	0	0	0	0	0
P68510	P68510	14-3-3 protein eta	Ywhah	NaN	NaN	NaN	0	1	NaN	NaN	NaN	NaN	NaN	NaN	NaN	NaN	19.3208	NaN	NaN	5	2	2	24.8	13.4	13.4	28.211	0.0024301	3.2661	3233400	2	0	0	1	0	0	0	0	1	1	0	0	1	0	0	0	0	0	0	0
P70158	P70158	Acid sphingomyelinase-like phosphodiesterase 3a	Smpdl3a	NaN	NaN	NaN	0	1	NaN	NaN	NaN	NaN	NaN	NaN	NaN	NaN	NaN	NaN	20.1104	1	1	1	4.9	4.9	4.9	49.857	0.0085016	2.0303	12545000	6	0	1	1	0	0	0	0	1	1	1	1	0	0	0	0	0	1	0	0
P70202	P70202	Latexin	Lxn	1.00908	0.013045	NaN	2	1	NaN	21.3898	22.2869	NaN	NaN	NaN	NaN	NaN	NaN	21.8514	NaN	2	2	2	13.5	13.5	13.5	25.492	0.0025806	3.7711	32732000	3	1	2	2	1	1	1	1	1	1	2	1	1	0	0	0	0	0	0	0
P70275	P70275	Semaphorin-3E	Sema3e	NaN	NaN	NaN	0	1	NaN	NaN	NaN	NaN	NaN	NaN	NaN	NaN	NaN	21.6704	NaN	1	1	1	1.8	1.8	1.8	89.542	0	16.058	41119000	6	1	1	0	1	1	1	1	1	1	1	1	0	0	0	0	0	1	0	0
P70428	P70428	Exostosin-2	Ext2	NaN	NaN	NaN	0	1	NaN	NaN	NaN	NaN	NaN	NaN	NaN	NaN	NaN	NaN	18.9775	1	1	1	1.8	1.8	1.8	82.063	0.0034014	2.6311	6975000	5	0	1	1	1	1	1	0	0	1	1	1	0	0	1	0	0	0	0	0
P80314	P80314	T-complex protein 1 subunit beta	Cct2	NaN	NaN	NaN	1	0	21.9845	NaN	NaN	NaN	NaN	NaN	NaN	NaN	NaN	NaN	NaN	2	2	2	6.7	6.7	6.7	57.477	0.0025974	3.8442	7651400	3	2	1	0	0	0	0	1	1	0	0	0	1	0	0	0	0	0	0	0
P97315	P97315	Cysteine and glycine-rich protein 1	Csrp1	0.711182	-0.49171	NaN	1	1	NaN	21.6551	NaN	NaN	NaN	NaN	NaN	NaN	NaN	21.1634	NaN	2	2	2	16.6	16.6	16.6	20.583	0	6.3371	13692000	2	0	2	0	0	0	1	0	1	0	2	0	0	1	0	0	0	0	0	0
P97372	P97372	Proteasome activator complex subunit 2	Psme2	NaN	NaN	NaN	0	1	NaN	NaN	NaN	NaN	NaN	NaN	NaN	19.0024	NaN	NaN	NaN	2	2	2	10.9	10.9	10.9	27.057	0.0024631	3.4798	5803200	1	0	0	0	0	0	1	0	1	0	1	0	0	0	0	0	0	0	1	0
P97402	P97402	N-acetyllactosaminide beta-1,6-N-acetylglucosaminyl-transferase	Gcnt2	NaN	NaN	NaN	0	1	NaN	NaN	NaN	NaN	NaN	NaN	NaN	20.3143	NaN	NaN	NaN	1	1	1	4	4	4	45.696	0	6.4409	10318000	2	0	1	1	1	1	0	1	1	0	0	0	0	0	1	0	0	0	0	0
P97447	P97447	Four and a half LIM domains protein 1	Fhl1	1.12893	0.17495	NaN	1	2	NaN	20.5434	NaN	NaN	NaN	NaN	NaN	20.6608	NaN	20.776	NaN	2	2	2	7.9	7.9	7.9	31.888	0.003413	2.6764	13664000	2	0	2	1	0	1	0	0	2	0	2	0	1	1	0	0	0	0	0	0
P97797	P97797	Tyrosine-protein phosphatase non-receptor type substrate 1	Sirpa	NaN	NaN	NaN	4	0	NaN	22.0655	22.4949	21.4105	22.2612	NaN	NaN	NaN	NaN	NaN	NaN	2	2	2	4.1	4.1	4.1	56.424	0.002439	3.3372	66868000	5	0	2	2	2	2	0	0	1	1	1	1	0	0	1	0	0	0	0	0
P97807	P97807	Fumarate hydratase, mitochondrial	Fh	NaN	NaN	NaN	0	1	NaN	NaN	NaN	NaN	NaN	NaN	NaN	19.1131	NaN	NaN	NaN	1	1	1	3	3	3	54.356	0.0035088	2.8745	1855500	1	0	0	0	0	0	0	0	1	0	0	0	1	0	0	1	0	0	0	0
P98154	P98154	Integral membrane protein DGCR2/IDD	Dgcr2	NaN	NaN	NaN	0	1	NaN	NaN	NaN	NaN	NaN	NaN	NaN	NaN	NaN	NaN	19.2246	1	1	1	2.2	2.2	2.2	60.696	0.0084388	1.9996	11854000	1	1	1	1	1	1	1	1	0	1	1	1	0	0	1	0	0	0	0	0
P99027	P99027	60S acidic ribosomal protein P2	Rplp2	NaN	NaN	NaN	0	1	NaN	NaN	NaN	NaN	NaN	NaN	NaN	NaN	NaN	19.353	NaN	1	1	1	10.4	10.4	10.4	11.651	0.0035211	2.886	5934200	2	0	1	1	1	0	0	0	0	1	1	0	0	0	0	0	0	0	1	0
Q00896	Q00896	Alpha-1-antitrypsin 1-3	Serpina1c	NaN	NaN	NaN	0	1	NaN	NaN	NaN	NaN	NaN	NaN	NaN	25.6565	NaN	NaN	NaN	28	12	1	57.5	32.5	5.3	45.823	0	316.27	192840000	3	0	0	1	1	0	0	0	1	1	1	0	0	0	0	0	0	1	0	0
Q01853	Q01853	Transitional endoplasmic reticulum ATPase	Vcp	0.896003	-0.158425	NaN	2	2	NaN	20.4786	20.7341	NaN	NaN	NaN	NaN	NaN	20.2837	20.6122	NaN	4	4	4	7.9	7.9	7.9	89.321	0	5.3064	17940000	5	0	2	2	1	1	1	1	2	2	3	0	1	1	0	0	0	0	0	0
Q02257	Q02257	Junction plakoglobin	Jup	NaN	NaN	NaN	0	1	NaN	NaN	NaN	NaN	NaN	NaN	NaN	NaN	21.6079	NaN	NaN	2	2	2	3.6	3.6	3.6	81.8	0.0024331	3.2931	10994000	2	0	0	0	1	0	0	0	1	2	0	0	1	0	1	0	0	0	0	0
Q91Z83;Q02566;A2AQP0	Q91Z83;Q02566	Myosin-7;Myosin-6	Myh7;Myh6	NaN	NaN	NaN	0	1	NaN	NaN	NaN	NaN	NaN	NaN	NaN	NaN	NaN	NaN	21.6769	6	1	1	4	0.6	0.6	222.88	0.0024361	3.3039	10340000	4	0	0	0	0	1	0	1	1	0	1	1	1	0	0	0	0	0	0	0
Q02596	Q02596	Glycosylation-dependent cell adhesion molecule 1	Glycam1	NaN	NaN	NaN	0	1	NaN	NaN	NaN	NaN	NaN	NaN	NaN	NaN	NaN	NaN	20.2368	1	1	1	13.2	13.2	13.2	16.209	0.0054054	2.139	4259100	2	0	0	0	0	0	0	0	0	0	1	1	0	0	1	0	0	0	0	0
Q05816	Q05816	Fatty acid-binding protein, epidermal	Fabp5	NaN	NaN	NaN	0	3	NaN	NaN	NaN	NaN	NaN	NaN	NaN	20.0344	21.2475	22.2432	NaN	2	2	2	15.6	15.6	15.6	15.137	0.0034884	2.8219	23357000	3	0	1	1	0	1	1	1	2	2	2	1	1	0	0	0	0	0	0	0
Q06186	Q06186	Proheparin-binding EGF-like growth factor;Heparin-binding EGF-like growth factor	Hbegf	NaN	NaN	NaN	0	1	NaN	NaN	NaN	NaN	NaN	NaN	NaN	NaN	NaN	NaN	21.3948	1	1	1	7.7	7.7	7.7	22.807	0	6.3533	57183000	9	1	1	1	1	1	1	1	1	1	1	1	0	0	1	0	0	1	0	0
Q06318	Q06318	Uteroglobin	Scgb1a1	1.06979	0.097325	NaN	2	4	22.9431	NaN	NaN	NaN	22.9661	NaN	NaN	22.8112	22.9305	23.4343	23.0317	2	2	2	18.8	18.8	18.8	10.519	0.0013106	3.9373	118840000	8	2	1	1	1	2	1	2	2	2	2	2	0	0	0	0	0	1	0	0
Q06806	Q06806	Tyrosine-protein kinase receptor Tie-1	Tie1	NaN	NaN	NaN	0	1	NaN	NaN	NaN	NaN	NaN	NaN	NaN	NaN	NaN	21.1664	NaN	2	2	2	2.5	2.5	2.5	124.58	0.0033975	2.62	11534000	2	0	1	1	0	1	0	0	1	1	2	1	0	0	1	0	0	0	0	0
Q07968	Q07968	Coagulation factor XIII B chain	F13b	NaN	NaN	NaN	0	1	NaN	NaN	NaN	NaN	NaN	NaN	NaN	21.2843	NaN	NaN	NaN	2	2	2	3	3	3	76.195	0.0013158	3.9892	11429000	2	1	0	0	1	0	1	0	2	1	0	0	0	0	0	0	0	1	0	0
Q14BU0	Q14BU0	Unique cartilage matrix-associated protein;Unique cartilage matrix-associated protein C-terminal fragment	Ucma	NaN	NaN	NaN	0	1	NaN	NaN	NaN	NaN	NaN	NaN	NaN	NaN	NaN	NaN	21.9597	1	1	1	9.4	9.4	9.4	16.579	0.0025413	3.6875	91411000	14	1	1	1	1	1	1	1	1	1	1	1	1	0	0	0	1	1	0	0
Q2XU92	Q2XU92	Long-chain-fatty-acid--CoA ligase ACSBG2	Acsbg2	NaN	NaN	NaN	0	1	NaN	NaN	NaN	NaN	NaN	NaN	NaN	NaN	NaN	21.6981	NaN	1	1	1	1.8	1.8	1.8	74.318	0.0084299	1.9921	22545000	0	0	0	1	1	0	0	0	0	1	1	0	1	0	1	0	0	0	0	0
Q3TA59	Q3TA59	JmjC domain-containing protein 8	Jmjd8	NaN	NaN	NaN	0	1	NaN	NaN	NaN	NaN	NaN	NaN	NaN	NaN	NaN	NaN	18.0036	1	1	1	4.1	4.1	4.1	35.538	0.0024691	3.4964	5957100	2	0	1	1	0	1	0	0	0	1	1	1	0	0	0	0	0	0	1	0
Q3TCN2	Q3TCN2	Putative phospholipase B-like 2;Putative phospholipase B-like 2 28 kDa form;Putative phospholipase B-like 2 40 kDa form;Putative phospholipase B-like 2 15 kDa form	Plbd2	2.07713	1.05459	NaN	1	2	NaN	NaN	20.9797	NaN	NaN	NaN	NaN	NaN	NaN	22.1918	21.8768	3	3	3	6.4	6.4	6.4	66.289	0	9.5955	28047000	2	0	1	2	0	1	1	1	0	0	3	3	0	0	0	0	0	0	1	0
Q3TYD4	Q3TYD4	Arylsulfatase G	Arsg	NaN	NaN	NaN	0	1	NaN	NaN	NaN	NaN	NaN	NaN	NaN	NaN	NaN	NaN	19.9223	1	1	1	3.8	3.8	3.8	57.433	0.002454	3.4211	10230000	1	0	1	1	0	0	0	0	1	0	1	1	0	0	0	0	0	0	1	0
Q3UDR8	Q3UDR8	Protein YIPF3;Protein YIPF3, N-terminally processed	Yipf3	NaN	NaN	NaN	0	1	NaN	NaN	NaN	NaN	NaN	NaN	NaN	NaN	NaN	NaN	24.7965	1	1	1	2.9	2.9	2.9	37.998	0.0025707	3.745	660780000	7	1	1	1	1	1	1	1	1	1	1	1	1	0	1	0	0	0	0	0
Q3UH99	Q3UH99	Protein shisa-6 homolog	Shisa6	NaN	NaN	NaN	0	1	NaN	NaN	NaN	NaN	NaN	NaN	NaN	NaN	NaN	20.5593	NaN	1	1	1	1.9	1.9	1.9	58.425	0.0044004	2.3285	31148000	1	1	1	1	0	1	1	1	1	1	1	0	0	0	1	0	0	0	0	0
Q3UHN9	Q3UHN9	Bifunctional heparan sulfate N-deacetylase/N-sulfotransferase 1;Heparan sulfate N-deacetylase 1;Heparan sulfate N-sulfotransferase 1	Ndst1	1.18026	0.239103	NaN	3	1	NaN	NaN	21.2381	NaN	21.1743	21.2955	21.4751	NaN	NaN	NaN	NaN	2	2	2	2.2	2.2	2.2	100.72	0	5.0864	25198000	7	1	1	2	2	2	2	2	0	2	1	1	0	0	1	0	0	0	0	0
Q3UQ28	Q3UQ28	Peroxidasin homolog	Pxdn	NaN	NaN	NaN	0	1	NaN	NaN	NaN	NaN	NaN	NaN	NaN	NaN	NaN	NaN	20.9332	1	1	1	0.7	0.7	0.7	165.1	0.0024272	3.2584	23387000	0	1	1	0	1	1	1	0	0	1	1	1	0	0	0	0	1	1	0	0
Q3UV17	Q3UV17	Keratin, type II cytoskeletal 2 oral	Krt76	NaN	NaN	NaN	0	1	NaN	NaN	NaN	NaN	NaN	NaN	NaN	NaN	NaN	NaN	26.0649	6	1	1	7.6	1.5	1.5	62.844	0.0034483	2.7817	956110000	4	1	1	1	1	1	0	1	1	1	1	1	0	0	0	0	0	0	1	0
Q4FZG7	Q4FZG7	Putative mitochondrial import inner membrane translocase subunit Tim8 A-B	Timm8a2	NaN	NaN	NaN	0	1	NaN	NaN	NaN	NaN	NaN	NaN	NaN	18.6947	NaN	NaN	NaN	1	1	1	26.8	26.8	26.8	11.283	0.0024242	3.2428	1388400	0	0	0	0	0	0	0	0	1	0	0	0	0	0	1	1	0	0	0	0
Q5I012	Q5I012	Putative sodium-coupled neutral amino acid transporter 10	Slc38a10	NaN	NaN	NaN	1	0	NaN	22.0366	NaN	NaN	NaN	NaN	NaN	NaN	NaN	NaN	NaN	2	2	2	2.9	2.9	2.9	117.19	0.0033822	2.5942	11976000	2	0	2	0	0	0	0	1	1	1	1	0	0	0	1	0	0	0	0	0
Q5RKR3	Q5RKR3	Immunoglobulin superfamily containing leucine-rich repeat protein 2	Islr2	NaN	NaN	NaN	0	1	NaN	NaN	NaN	NaN	NaN	NaN	NaN	NaN	NaN	NaN	18.2633	1	1	1	1.9	1.9	1.9	79.757	0.0035629	3.0465	4215600	4	0	1	0	1	1	0	0	0	1	1	1	0	0	1	0	0	0	0	0
Q5SX39;Q5SX40;P13542;P13541	Q5SX39;Q5SX40;P13542	Myosin-4;Myosin-1;Myosin-8	Myh4;Myh1;Myh8	1.70019	0.765697	NaN	1	4	NaN	NaN	NaN	NaN	22.448	NaN	22.9342	22.5405	NaN	23.0574	24.3226	12	12	7	9	9	5.6	222.86	0	40.218	81328000	12	0	0	0	0	2	0	2	2	0	4	6	1	0	0	0	0	0	0	0
Q5SZV5	Q5SZV5	Dyslexia-associated protein KIAA0319 homolog	Kiaa0319	NaN	NaN	NaN	0	1	NaN	NaN	NaN	NaN	NaN	NaN	NaN	NaN	NaN	NaN	20.3131	1	1	1	1.4	1.4	1.4	117.99	0.0024938	3.5669	28245000	9	1	1	1	1	1	1	1	1	1	1	1	0	0	1	0	0	0	0	0
Q5U5Q9	Q5U5Q9	BRCA1-A complex subunit RAP80	Uimc1	NaN	NaN	NaN	0	1	NaN	NaN	NaN	NaN	NaN	NaN	NaN	NaN	NaN	NaN	23.9672	1	1	1	1	1	1	81.477	0	4.2111	265250000	7	1	1	1	1	1	1	1	1	1	1	1	0	1	0	0	0	0	0	0
Q60605;Q8CI43	Q60605;Q8CI43	Myosin light polypeptide 6;Myosin light chain 6B	Myl6;Myl6b	NaN	NaN	NaN	0	1	NaN	NaN	NaN	NaN	NaN	NaN	NaN	NaN	NaN	20.0015	NaN	1	1	1	8.6	8.6	8.6	16.93	0.0084746	2.0257	6912300	2	0	1	1	0	0	0	0	0	1	1	0	0	0	0	0	0	0	1	0
Q60625	Q60625	Intercellular adhesion molecule 5	Icam5	NaN	NaN	NaN	0	1	NaN	NaN	NaN	NaN	NaN	NaN	NaN	NaN	NaN	NaN	19.7271	1	1	1	1.4	1.4	1.4	96.944	0.002594	3.8377	8323800	2	0	1	0	0	1	0	0	1	1	1	1	0	0	1	0	0	0	0	0
Q60674	Q60674	Nuclear receptor subfamily 1 group D member 2	Nr1d2	NaN	NaN	NaN	0	1	NaN	NaN	NaN	NaN	NaN	NaN	NaN	NaN	NaN	NaN	26.0177	2	2	2	3.8	3.8	3.8	64.301	0.0035928	3.1123	654530000	3	1	1	0	1	1	1	0	1	0	0	1	0	1	0	0	0	0	0	0
Q61200	Q61200	Neurexophilin-1	Nxph1	NaN	NaN	NaN	0	1	NaN	NaN	NaN	NaN	NaN	NaN	NaN	NaN	NaN	NaN	23.1287	1	1	1	2.6	2.6	2.6	31.048	0.0053879	2.1129	126550000	7	1	1	1	1	1	1	1	1	0	1	1	0	0	0	0	0	1	0	0
Q61206	Q61206	Platelet-activating factor acetylhydrolase IB subunit beta	Pafah1b2	NaN	NaN	NaN	0	4	NaN	NaN	NaN	NaN	NaN	NaN	NaN	20.4782	20.4469	21.5272	19.7147	2	2	2	12.2	12.2	12.2	25.581	0.002442	3.3477	18175000	5	0	1	1	0	0	1	0	2	2	2	2	1	0	0	0	0	0	0	0
Q61233;Q99K51	Q61233	Plastin-2	Lcp1	0.626436	-0.674762	NaN	1	5	NaN	NaN	NaN	NaN	NaN	22.3379	21.8803	21.2535	21.002	22.1559	22.0242	5	5	5	11.5	11.5	11.5	70.148	0	35.188	47631000	11	1	1	1	1	1	2	2	4	4	5	3	1	0	1	0	0	0	0	0
Q61268	Q61268	Apolipoprotein C-IV	Apoc4	NaN	NaN	NaN	0	1	NaN	NaN	NaN	NaN	NaN	NaN	NaN	21.8162	NaN	NaN	NaN	1	1	1	8.9	8.9	8.9	14.288	0.0034722	2.7998	13832000	1	1	0	0	0	1	0	0	1	0	0	0	0	0	0	0	0	1	0	0
Q61553	Q61553	Fascin	Fscn1	NaN	NaN	NaN	0	1	NaN	NaN	NaN	NaN	NaN	NaN	NaN	NaN	NaN	NaN	21.0069	2	2	2	5.7	5.7	5.7	54.507	0	5.3619	20668000	7	0	1	1	1	1	0	0	0	0	2	1	1	0	0	0	0	0	0	0
Q61598	Q61598	Rab GDP dissociation inhibitor beta	Gdi2	0.543371	-0.87999	NaN	1	1	NaN	22.5072	NaN	NaN	NaN	NaN	NaN	21.6272	NaN	NaN	NaN	6	4	4	18.9	12.1	12.1	50.537	0	9.3795	40299000	14	1	2	1	0	1	1	1	3	2	2	0	1	0	1	0	0	0	0	0
Q61735	Q61735	Leukocyte surface antigen CD47	Cd47	1.45609	0.542098	NaN	2	4	NaN	21.0869	NaN	20.1837	NaN	NaN	20.6275	21.007	21.1207	21.9545	NaN	2	2	2	8.9	8.9	8.9	33.097	0	7.2002	38603000	6	1	2	1	2	1	1	2	2	2	2	1	0	0	1	0	0	0	0	0
Q61955	Q61955	Kallikrein-8	Klk8	NaN	NaN	NaN	0	1	NaN	NaN	NaN	NaN	NaN	NaN	NaN	NaN	NaN	NaN	19.8466	1	1	1	4.2	4.2	4.2	28.523	0.0054348	2.1784	26726000	1	1	1	1	1	1	1	1	0	1	1	1	1	0	0	0	0	1	0	0
Q62009	Q62009	Periostin	Postn	NaN	NaN	NaN	0	1	NaN	NaN	NaN	NaN	NaN	NaN	NaN	NaN	NaN	NaN	19.7762	2	1	1	3.1	1.7	1.7	93.142	0.0093168	1.861	7600000	3	0	1	1	1	1	0	1	0	1	1	1	0	0	0	0	1	1	0	0
Q62048	Q62048	Astrocytic phosphoprotein PEA-15	Pea15	0.840633	-0.250452	NaN	2	3	NaN	21.6597	21.6428	NaN	NaN	NaN	NaN	21.145	21.8615	21.196	NaN	3	3	3	31.5	31.5	31.5	15.054	0	7.3751	43477000	8	1	2	3	1	1	1	1	3	2	3	0	1	0	0	0	0	0	0	0
Q62092	Q62092	Neuron-specific protein family member 1	Nsg1	NaN	NaN	NaN	0	1	NaN	NaN	NaN	NaN	NaN	NaN	NaN	NaN	NaN	NaN	23.2743	1	1	1	5.9	5.9	5.9	20.929	0	30.707	275800000	10	1	1	1	1	1	1	1	1	1	1	1	0	0	1	0	0	0	0	0
Q9QUI0;Q62159	Q9QUI0;Q62159	Transforming protein RhoA;Rho-related GTP-binding protein RhoC	Rhoa;Rhoc	1.31103	0.390705	NaN	2	1	NaN	21.2859	21.4334	NaN	NaN	NaN	NaN	NaN	NaN	21.7504	NaN	2	2	2	13.5	13.5	13.5	21.782	0	4.3432	16475000	5	0	1	1	0	0	1	0	0	0	1	0	1	0	1	0	0	0	0	0
Q62313;Q62314	Q62313;Q62314	Trans-Golgi network integral membrane protein 1;Trans-Golgi network integral membrane protein 2	Tgoln1;Tgoln2	NaN	NaN	NaN	0	1	NaN	NaN	NaN	NaN	NaN	NaN	NaN	16.6465	NaN	NaN	NaN	2	2	2	7.9	7.9	7.9	37.848	0.002448	3.3738	15471000	4	1	1	0	1	1	1	1	1	1	0	0	0	0	1	0	0	0	0	0
Q62426	Q62426	Cystatin-B	Cstb	1.05412	0.076045	NaN	2	2	NaN	NaN	23.0671	22.0844	NaN	NaN	NaN	21.9719	NaN	23.3317	NaN	3	3	3	39.8	39.8	39.8	11.045	0	4.7919	72508000	4	1	1	3	2	1	1	1	3	1	3	1	1	0	0	0	0	0	0	0
Q62504	Q62504	Msx2-interacting protein	Spen	NaN	NaN	NaN	0	1	NaN	NaN	NaN	NaN	NaN	NaN	NaN	NaN	NaN	NaN	21.8017	1	1	1	0.3	0.3	0.3	398.75	0.0053937	2.1171	60465000	8	1	0	1	1	0	1	1	1	1	1	1	0	1	0	0	0	0	0	0
Q63844	Q63844	Mitogen-activated protein kinase 3	Mapk3	1.22138	0.28851	NaN	2	1	NaN	21.2705	20.6236	NaN	NaN	NaN	NaN	NaN	NaN	21.2355	NaN	2	2	2	8.4	8.4	8.4	43.066	0	4.5769	13087000	2	0	2	2	0	1	0	0	0	0	2	0	1	1	0	0	0	0	0	0
Q91WU0;Q64176	Q91WU0;Q64176	Carboxylic ester hydrolase;Carboxylesterase 1E	Ces1f;Ces1e	NaN	NaN	NaN	0	1	NaN	NaN	NaN	NaN	NaN	NaN	NaN	25.7642	NaN	NaN	NaN	2	1	1	5	3.7	3.7	61.612	0.0054407	2.1808	186480000	1	0	0	0	0	0	0	0	1	0	0	0	1	0	0	0	0	0	0	0
Q64253	Q64253	Lymphocyte antigen 6E	Ly6e	NaN	NaN	NaN	0	1	NaN	NaN	NaN	NaN	NaN	NaN	NaN	NaN	NaN	NaN	22.3991	1	1	1	10.8	10.8	10.8	13.8	0	42.697	137900000	9	1	1	1	1	1	1	1	1	1	1	1	0	0	1	0	0	0	0	1
Q9JMA7;Q64459	Q9JMA7;Q64459	Cytochrome P450 3A41;Cytochrome P450 3A11	Cyp3a41a;Cyp3a11	NaN	NaN	NaN	0	1	NaN	NaN	NaN	NaN	NaN	NaN	NaN	NaN	21.8664	NaN	NaN	1	1	1	1.6	1.6	1.6	57.986	0.0035129	2.8751	49459000	0	0	0	0	1	0	0	0	1	1	0	0	0	0	1	0	0	0	0	0
Q64687	Q64687	Alpha-N-acetylneuraminide alpha-2,8-sialyltransferase	St8sia1	0.838538	-0.254053	NaN	2	4	NaN	NaN	20.8617	NaN	NaN	21.4552	21.1516	NaN	20.7552	20.8648	20.8461	2	2	2	6.2	6.2	6.2	40.323	0.0034208	2.6814	23222000	4	0	0	2	1	1	2	2	1	2	2	2	0	0	1	0	0	0	0	0
Q64697	Q64697	Protein tyrosine phosphatase receptor type C-associated protein	Ptprcap	NaN	NaN	NaN	0	1	NaN	NaN	NaN	NaN	NaN	NaN	NaN	23.1625	NaN	NaN	NaN	1	1	1	4.1	4.1	4.1	20.37	0.0093361	1.8683	30722000	1	0	0	0	0	0	0	0	1	0	0	0	0	0	1	0	0	0	0	0
Q64727	Q64727	Vinculin	Vcl	0.559227	-0.838493	NaN	1	3	NaN	22.1939	NaN	NaN	NaN	NaN	NaN	21.7558	NaN	21.2771	21.0335	5	5	5	6.5	6.5	6.5	116.72	0	8.3064	32839000	6	0	5	1	1	1	1	1	2	0	2	2	1	0	1	0	0	0	0	0
Q64729	Q64729	TGF-beta receptor type-1	Tgfbr1	NaN	NaN	NaN	0	1	NaN	NaN	NaN	NaN	NaN	NaN	NaN	NaN	NaN	NaN	19.3005	1	1	1	3.2	3.2	3.2	56.178	0.0035377	2.9497	7770500	3	0	0	1	0	0	0	0	1	1	1	1	0	0	1	0	0	0	0	0
Q68FD5	Q68FD5	Clathrin heavy chain 1	Cltc	0.79648	-0.32829	NaN	2	1	NaN	22.0925	22.1433	NaN	NaN	NaN	NaN	NaN	NaN	21.7896	NaN	3	3	3	3.1	3.1	3.1	191.55	0	5.9238	26872000	7	0	3	3	0	1	1	1	1	0	3	0	1	0	1	0	0	0	0	0
Q6P253	Q6P253	Dermokine	Dmkn	NaN	NaN	NaN	0	1	NaN	NaN	NaN	NaN	NaN	NaN	NaN	NaN	NaN	21.2186	NaN	2	2	2	4.6	4.6	4.6	51.66	0.0024845	3.5455	27285000	0	1	1	1	1	1	1	1	1	1	2	1	0	0	0	0	0	1	0	0
Q6RKD8	Q6RKD8		Flrt1	1.09051	0.125008	NaN	2	3	NaN	19.8932	NaN	NaN	20.5408	NaN	NaN	NaN	20.37	20.5387	20.1173	2	2	2	4.5	4.5	4.5	74.15	0.0035842	3.0983	16627000	4	0	2	1	1	2	0	1	1	2	2	2	1	0	1	0	0	1	0	0
Q6ZWY8	Q6ZWY8	Thymosin beta-10	Tmsb10	0.608855	-0.71583	NaN	2	3	22.9623	23.5157	NaN	NaN	NaN	NaN	22.497	22.7833	NaN	NaN	22.2892	2	2	2	63.6	63.6	63.6	5.0256	0	9.2193	117830000	7	2	2	1	1	1	1	2	2	1	2	2	1	0	0	0	0	0	0	0
Q76MZ3	Q76MZ3	Serine/threonine-protein phosphatase 2A 65 kDa regulatory subunit A alpha isoform	Ppp2r1a	NaN	NaN	NaN	2	0	NaN	21.3499	21.1043	NaN	NaN	NaN	NaN	NaN	NaN	NaN	NaN	3	3	3	7	7	7	65.322	0.0025349	3.6817	17799000	4	0	2	2	0	1	1	0	1	1	2	0	1	0	0	0	0	0	0	0
Q7M729	Q7M729	Sodium channel subunit beta-4	Scn4b	NaN	NaN	NaN	2	0	NaN	23.3058	NaN	23.1553	NaN	NaN	NaN	NaN	NaN	NaN	NaN	2	2	2	9.6	9.6	9.6	25.192	0.0034091	2.6671	69165000	4	0	2	1	2	1	1	0	1	1	1	1	0	0	1	0	0	0	0	0
Q7TNG5	Q7TNG5	Echinoderm microtubule-associated protein-like 2	Eml2	1.07331	0.102065	NaN	2	1	NaN	21.16	20.8314	NaN	NaN	NaN	NaN	NaN	NaN	21.0978	NaN	3	3	3	6.8	6.8	6.8	70.733	0	5.8984	17313000	4	1	2	3	0	1	1	0	1	0	2	0	1	0	0	0	0	0	0	0
Q7TNR6	Q7TNR6	Immunoglobulin superfamily member 21	Igsf21	NaN	NaN	NaN	2	0	21.4895	NaN	NaN	NaN	NaN	22.0535	NaN	NaN	NaN	NaN	NaN	2	2	2	4.5	4.5	4.5	51.937	0	6.9339	21654000	12	2	1	1	1	1	2	1	1	1	1	1	0	0	0	0	0	1	0	0
Q7TQ33	Q7TQ33	RGM domain family member B	Rgmb	2.44009	1.28693	NaN	2	4	NaN	NaN	NaN	20.7258	21.0787	NaN	NaN	21.3145	22.4859	22.5452	22.4111	4	4	4	21.8	21.8	21.8	47.181	0	7.2253	54899000	8	0	1	1	2	2	0	0	3	4	3	2	0	0	1	0	0	0	0	1
Q7TQA1	Q7TQA1	Immunoglobulin superfamily member 1	Igsf1	NaN	NaN	NaN	0	1	NaN	NaN	NaN	NaN	NaN	NaN	NaN	NaN	NaN	NaN	21.0007	2	2	2	1.6	1.6	1.6	147.01	0.0043956	2.3268	33022000	6	1	1	1	1	1	1	1	1	1	2	1	0	0	1	0	0	1	0	0
Q7TQI3	Q7TQI3	Ubiquitin thioesterase OTUB1	Otub1	NaN	NaN	NaN	0	1	NaN	NaN	NaN	NaN	NaN	NaN	NaN	NaN	NaN	20.1115	NaN	1	1	1	5.5	5.5	5.5	31.27	0	5.7273	8161900	1	0	1	1	1	0	1	1	0	1	1	0	1	0	0	0	0	0	0	0
Q80YC5	Q80YC5	Coagulation factor XII;Coagulation factor XIIa heavy chain;Coagulation factor XIIa light chain	F12	NaN	NaN	NaN	0	4	NaN	NaN	NaN	NaN	NaN	NaN	NaN	25.9748	22.9278	21.2933	22.0176	5	5	5	12.2	12.2	12.2	65.701	0	23.032	254970000	9	0	0	2	1	2	1	1	4	3	3	2	0	0	0	0	0	1	0	0
Q810B9	Q810B9	SLIT and NTRK-like protein 3	Slitrk3	NaN	NaN	NaN	0	1	NaN	NaN	NaN	NaN	NaN	NaN	NaN	NaN	21.3147	NaN	NaN	3	3	3	5	5	5	109.41	0	5.5942	23806000	4	0	1	0	1	0	1	0	2	2	1	1	0	0	1	0	0	0	0	0
Q8BFR5	Q8BFR5	Elongation factor Tu, mitochondrial	Tufm	NaN	NaN	NaN	0	1	NaN	NaN	NaN	NaN	NaN	NaN	NaN	NaN	NaN	NaN	18.2081	1	1	1	3.3	3.3	3.3	49.508	0	5.6871	53122000	2	1	1	0	1	1	0	0	1	1	1	1	0	0	0	1	0	0	0	0
Q8BGU2	Q8BGU2	Cerebellin-2	Cbln2	NaN	NaN	NaN	0	1	NaN	NaN	NaN	NaN	NaN	NaN	NaN	NaN	NaN	NaN	19.4963	2	1	1	9.4	5.8	5.8	24.05	0.0035714	3.0687	6428300	3	0	1	1	1	0	0	0	0	0	1	1	0	0	0	0	0	1	0	0
Q8BH34	Q8BH34	Semaphorin-3D	Sema3d	NaN	NaN	NaN	0	2	NaN	NaN	NaN	NaN	NaN	NaN	NaN	NaN	20.5878	21.3591	NaN	3	3	3	4.4	4.4	4.4	89.548	0.0013298	4.0657	13402000	3	0	0	0	0	0	1	1	2	2	2	1	0	0	0	0	0	1	0	0
Q8BI84	Q8BI84	Melanoma inhibitory activity protein 3	Mia3	0.916193	-0.126276	NaN	2	5	NaN	NaN	20.8881	21.3808	NaN	NaN	21.4529	20.1001	21.2364	21.2998	20.9516	2	2	2	1.3	1.3	1.3	213.67	0	4.1977	38350000	12	1	1	2	2	1	1	2	2	2	2	2	0	0	1	0	0	0	0	0
Q8BK48	Q8BK48	Pyrethroid hydrolase Ces2e	Ces2e	NaN	NaN	NaN	0	1	NaN	NaN	NaN	NaN	NaN	NaN	NaN	23.0555	NaN	NaN	NaN	4	4	4	10	10	10	62.317	0	7.2595	36843000	4	1	1	0	1	0	0	0	4	1	0	1	0	0	0	0	0	0	1	0
Q8BKG3	Q8BKG3	Inactive tyrosine-protein kinase 7	Ptk7	NaN	NaN	NaN	0	1	NaN	NaN	NaN	NaN	NaN	NaN	NaN	19.1869	NaN	NaN	NaN	2	2	2	2.4	2.4	2.4	117.53	0.0083857	1.9422	4830400	2	0	0	0	0	0	1	1	1	0	1	0	0	0	1	0	0	0	0	0
Q8BM72	Q8BM72	Heat shock 70 kDa protein 13	Hspa13	NaN	NaN	NaN	0	1	NaN	NaN	NaN	NaN	NaN	NaN	NaN	NaN	NaN	18.6806	NaN	2	2	2	5.5	5.5	5.5	51.709	0.003386	2.6087	7382900	2	1	1	0	1	1	1	1	0	0	1	1	0	0	0	0	0	0	1	0
Q8BME9	Q8BME9	Cerebellin-4	Cbln4	1.03729	0.0528125	NaN	2	4	NaN	22.077	21.695	NaN	NaN	NaN	22.2651	NaN	21.8831	21.8093	21.7978	2	2	2	13.1	13.1	13.1	21.609	0	4.2899	60071000	8	1	2	2	2	2	1	2	1	2	2	2	0	0	0	0	0	1	0	0
Q8BMS2	Q8BMS2	Spondin-2	Spon2	0.702819	-0.508775	NaN	2	2	NaN	20.6516	21.6793	NaN	NaN	NaN	NaN	19.9699	NaN	NaN	21.3434	2	2	2	12.4	12.4	12.4	35.964	0.0013316	4.0831	33234000	7	0	2	2	1	1	1	1	2	1	1	2	0	0	0	0	1	1	0	0
Q8BP92	Q8BP92	Reticulocalbin-2	Rcn2	NaN	NaN	NaN	0	2	NaN	NaN	NaN	NaN	NaN	NaN	NaN	NaN	20.6281	21.0409	NaN	2	2	2	8.4	8.4	8.4	37.27	0.0034843	2.8156	14929000	3	0	1	1	1	0	1	0	1	2	2	1	0	0	0	0	0	0	1	0
Q8BT18	Q8BT18	Uncharacterized protein C14orf37 homolog		1.01815	0.0259567	NaN	2	3	NaN	NaN	23.16	23.9317	NaN	NaN	NaN	NaN	23.8061	23.5653	23.3439	2	2	2	3.7	3.7	3.7	83.773	0	16.267	220240000	8	1	1	2	2	1	1	1	1	2	2	2	0	0	1	0	0	0	0	0
Q8BUY5	Q8BUY5	Complex I assembly factor TIMMDC1, mitochondrial	Timmdc1	NaN	NaN	NaN	0	1	NaN	NaN	NaN	NaN	NaN	NaN	NaN	NaN	NaN	NaN	23.2275	1	1	1	2.1	2.1	2.1	31.791	0.0035503	3.0098	239210000	9	1	1	1	1	1	1	1	1	1	1	1	0	0	1	1	0	0	0	0
Q8BWD8	Q8BWD8	Cyclin-dependent kinase 19	Cdk19	NaN	NaN	NaN	0	1	NaN	NaN	NaN	NaN	NaN	NaN	NaN	NaN	NaN	NaN	23.1939	1	1	1	3.4	3.4	3.4	56.569	0.0044693	2.5121	254720000	8	1	1	1	1	1	1	1	1	1	1	1	0	0	0	0	0	0	1	0
Q8C4W3	Q8C4W3	Neuritin-like protein	Nrn1l	NaN	NaN	NaN	0	2	NaN	NaN	NaN	NaN	NaN	NaN	NaN	21.1474	23.2912	NaN	NaN	2	2	2	19.1	19.1	19.1	17.39	0	9.5501	68857000	3	1	1	1	1	1	1	1	2	2	1	1	0	0	1	0	0	0	0	1
Q8C8N3	Q8C8N3	Brorin	Vwc2	NaN	NaN	NaN	0	2	NaN	NaN	NaN	NaN	NaN	NaN	NaN	NaN	20.6053	20.206	NaN	2	2	2	4	4	4	35.383	0.0035672	3.0607	12185000	4	0	1	1	1	1	0	0	1	2	2	1	0	0	0	0	1	1	0	0
Q8CAE9	Q8CAE9	Podocalyxin-like protein 2	Podxl2	NaN	NaN	NaN	0	1	NaN	NaN	NaN	NaN	NaN	NaN	NaN	NaN	NaN	NaN	19.782	1	1	1	1.8	1.8	1.8	64.972	0.0036014	3.1233	13656000	5	1	1	1	1	1	0	0	1	1	1	1	0	0	1	0	0	0	0	0
Q8CFG0	Q8CFG0	Extracellular sulfatase Sulf-2	Sulf2	1.15702	0.21041	NaN	1	1	NaN	21.5592	NaN	NaN	NaN	NaN	NaN	NaN	21.7696	NaN	NaN	2	2	2	4	4	4	100.5	0	5.0815	36300000	4	1	2	1	1	1	1	0	1	2	1	1	0	0	0	0	0	0	1	0
Q8CG19	Q8CG19	Latent-transforming growth factor beta-binding protein 1	Ltbp1	NaN	NaN	NaN	0	1	NaN	NaN	NaN	NaN	NaN	NaN	NaN	NaN	NaN	NaN	20.9623	2	2	2	1.3	1.3	1.3	186.72	0.0093946	1.8932	20859000	1	1	1	1	1	1	0	1	1	1	1	1	0	0	0	0	0	1	0	0
Q8CG73	Q8CG73	Protein fantom	Rpgrip1l	NaN	NaN	NaN	0	1	NaN	NaN	NaN	NaN	NaN	NaN	NaN	NaN	NaN	NaN	22.0388	1	1	1	1.3	1.3	1.3	145	0.0054526	2.2471	58228000	2	0	1	1	0	0	1	1	0	0	1	1	1	0	0	0	0	0	0	0
Q8JZM4	Q8JZM4	Delta and Notch-like epidermal growth factor-related receptor	Dner	NaN	NaN	NaN	0	1	NaN	NaN	NaN	NaN	NaN	NaN	NaN	NaN	NaN	22.9115	NaN	1	1	1	2	2	2	78.747	0	6.1203	160240000	9	1	1	1	1	1	1	1	1	1	1	0	0	0	1	0	0	0	0	0
Q8K097	Q8K097	Protein lifeguard 2	Faim2	NaN	NaN	NaN	0	0	NaN	NaN	NaN	NaN	NaN	NaN	NaN	NaN	NaN	NaN	NaN	1	1	1	6.9	6.9	6.9	35.257	0.0064171	2.0897	0	1	0	0	0	1	0	0	0	0	0	0	0	0	0	1	0	0	0	0	0
Q8K0D2	Q8K0D2	Hyaluronan-binding protein 2;Hyaluronan-binding protein 2 50 kDa heavy chain;Hyaluronan-binding protein 2 50 kDa heavy chain alternate form;Hyaluronan-binding protein 2 27 kDa light chain;Hyaluronan-binding protein 2 27 kDa light chain alternate form	Habp2	1.22361	0.29114	NaN	2	2	NaN	21.3651	NaN	21.9803	NaN	NaN	NaN	NaN	22.1605	21.7672	NaN	2	2	2	5	5	5	62.356	0	4.1804	71052000	4	1	2	1	2	1	1	1	1	2	2	1	0	0	0	0	0	1	0	0
Q8K183	Q8K183	Pyridoxal kinase	Pdxk	1.60361	0.68132	NaN	1	1	NaN	20.1938	NaN	NaN	NaN	NaN	NaN	NaN	NaN	20.8751	NaN	2	2	2	10.3	10.3	10.3	35.015	0.0025773	3.7689	12736000	2	1	2	0	0	1	0	0	1	1	2	1	1	0	0	0	0	0	0	0
Q8K209	Q8K209	G-protein coupled receptor 56;GPR56 N-terminal fragment;GPR56 C-terminal fragment	Gpr56	NaN	NaN	NaN	0	1	NaN	NaN	NaN	NaN	NaN	NaN	NaN	NaN	NaN	NaN	19.2956	1	1	1	1.6	1.6	1.6	77.254	0.0035971	3.1233	11203000	4	1	1	1	1	1	0	1	0	1	1	1	0	0	1	0	0	1	0	0
Q8K262	Q8K262	Placenta-specific protein 9	Plac9	NaN	NaN	NaN	1	0	NaN	23.2012	NaN	NaN	NaN	NaN	NaN	NaN	NaN	NaN	NaN	2	2	2	10.2	10.2	10.2	11.275	0	9.9938	45457000	4	0	2	1	1	1	1	1	0	1	1	1	0	0	0	0	0	1	0	0
REV__P16546;Q8K371	REV__P16546;Q8K371	Angiomotin-like protein 2	Amotl2	NaN	NaN	NaN	0	1	NaN	NaN	NaN	NaN	NaN	NaN	NaN	NaN	NaN	NaN	21.4256	1	1	1	0.8	0.8	0.8	284.59	0.0085197	2.0347	50966000	1	0	0	1	1	1	0	1	1	1	1	1	0	0	0	0	0	0	1	0
Q8QZR3;Q91WG0	Q8QZR3;Q91WG0	Pyrethroid hydrolase Ces2a;Acylcarnitine hydrolase	Ces2a;Ces2c	NaN	NaN	NaN	0	1	NaN	NaN	NaN	NaN	NaN	NaN	NaN	21.1267	NaN	NaN	NaN	2	2	2	5.9	5.9	5.9	61.94	0.0044395	2.4706	9572200	1	0	0	0	0	0	0	0	2	1	1	1	0	0	0	0	0	0	1	0
Q8R0Y6	Q8R0Y6	Cytosolic 10-formyltetrahydrofolate dehydrogenase	Aldh1l1	1.38203	0.46679	NaN	1	1	NaN	20.1229	NaN	NaN	NaN	NaN	NaN	NaN	NaN	20.5897	NaN	2	2	2	2.9	2.9	2.9	98.708	0.0034052	2.6467	6884900	2	0	2	1	0	0	0	0	0	0	2	0	1	0	0	0	0	0	0	0
Q8R146	Q8R146	Acylamino-acid-releasing enzyme	Apeh	NaN	NaN	NaN	0	0	NaN	NaN	NaN	NaN	NaN	NaN	NaN	NaN	NaN	NaN	NaN	2	2	2	2.7	2.7	2.7	81.58	0.0054466	2.2131	0	3	0	0	1	0	0	0	0	1	0	1	0	1	0	0	0	0	0	0	0
Q8R1G2	Q8R1G2	Carboxymethylenebutenolidase homolog	Cmbl	NaN	NaN	NaN	0	2	NaN	NaN	NaN	NaN	NaN	NaN	21.5266	NaN	NaN	22.1491	NaN	3	3	3	12.7	12.7	12.7	27.902	0	7.0718	32616000	6	1	2	2	1	1	0	2	1	2	2	0	1	0	0	0	0	0	0	0
Q8R448	Q8R448	Otospiralin	Otos	NaN	NaN	NaN	0	1	NaN	NaN	NaN	NaN	NaN	NaN	NaN	NaN	NaN	22.1791	NaN	1	1	1	23.6	23.6	23.6	10.184	0	10.127	61839000	2	0	0	0	0	0	0	0	1	0	1	0	0	0	0	0	0	1	0	0
Q8VHC3	Q8VHC3	Selenoprotein M	Selm	1.04452	0.062835	NaN	2	4	NaN	NaN	22.4389	NaN	22.4818	NaN	NaN	21.8463	22.869	22.9291	22.4483	3	3	3	25.5	25.5	25.5	16.377	0	8.2691	89995000	7	1	1	3	1	2	1	0	3	3	3	3	1	0	0	0	0	0	0	0
Q8VHP6	Q8VHP6	Cadherin-related family member 1	Cdhr1	NaN	NaN	NaN	0	1	NaN	NaN	NaN	NaN	NaN	NaN	NaN	NaN	NaN	20.4286	NaN	2	2	2	2.6	2.6	2.6	94.026	0	4.5295	8970500	2	0	0	0	1	1	0	0	0	1	2	0	0	0	1	0	0	0	0	0
Q91V80	Q91V80	Apolipoprotein F	Apof	2.05998	1.04263	NaN	2	2	NaN	19.4418	21.217	NaN	NaN	NaN	NaN	21.5923	NaN	NaN	21.1518	2	2	2	10.2	10.2	10.2	34.359	0	7.8629	25435000	5	1	2	2	1	0	0	1	2	0	1	2	0	0	0	0	0	1	0	0
Q91WR8	Q91WR8	Glutathione peroxidase 6	Gpx6	1.15414	0.206815	NaN	2	1	NaN	19.2412	NaN	NaN	22.188	NaN	20.9214	NaN	NaN	NaN	NaN	2	2	2	9.5	9.5	9.5	24.903	0.0024722	3.5302	14613000	4	0	2	0	1	2	1	2	1	1	1	1	0	0	0	0	0	1	0	0
Q91X91	Q91X91	Nicotinate-nucleotide pyrophosphorylase [carboxylating]	Qprt	1.34182	0.424195	NaN	2	1	NaN	21.4887	21.7697	NaN	NaN	NaN	NaN	NaN	NaN	22.0534	NaN	2	2	2	8.7	8.7	8.7	31.53	0.0044444	2.4811	21995000	4	0	2	2	0	0	0	0	0	1	2	0	0	0	0	0	0	0	1	0
Q91XA2	Q91XA2	Golgi membrane protein 1	Golm1	NaN	NaN	NaN	0	1	NaN	NaN	NaN	NaN	NaN	NaN	NaN	NaN	NaN	NaN	19.4555	1	1	1	2.8	2.8	2.8	44.326	0.0043668	2.2745	13807000	1	0	1	1	1	1	1	1	0	1	1	1	0	0	1	0	0	0	0	0
Q91Z53	Q91Z53	Glyoxylate reductase/hydroxypyruvate reductase	Grhpr	0.675651	-0.56565	NaN	1	2	NaN	NaN	22.0815	NaN	NaN	NaN	NaN	NaN	20.9068	22.125	NaN	2	2	2	9.1	9.1	9.1	35.328	0.0036232	3.225	34223000	6	1	1	2	0	0	0	1	1	2	2	1	0	0	0	0	0	0	1	0
Q91ZA6	Q91ZA6	Suppressor of cytokine signaling 4	Socs4	NaN	NaN	NaN	1	0	NaN	NaN	NaN	NaN	NaN	28.4049	NaN	NaN	NaN	NaN	NaN	1	1	1	2.8	2.8	2.8	49.917	0.0034169	2.6769	2147700000	4	1	0	1	0	1	1	0	0	0	0	0	0	0	0	0	0	0	1	0
Q91ZR1;P56371	Q91ZR1;P56371	Ras-related protein Rab-4B;Ras-related protein Rab-4A	Rab4b;Rab4a	1.03145	0.04467	NaN	2	3	NaN	20.4059	20.2824	NaN	NaN	NaN	20.4057	NaN	20.3994	NaN	20.3614	2	2	2	11.3	11.3	11.3	23.629	0.004386	2.3173	18797000	4	1	2	2	2	1	1	2	1	2	1	2	1	0	1	0	0	0	0	0
Q91ZZ3	Q91ZZ3	Beta-synuclein	Sncb	NaN	NaN	NaN	0	1	NaN	NaN	NaN	NaN	NaN	NaN	NaN	NaN	NaN	NaN	22.8629	1	1	1	10.5	10.5	10.5	14.051	0.0094044	1.9109	67086000	2	0	0	1	1	0	1	1	0	0	1	1	1	0	0	0	0	0	0	0
Q920N7	Q920N7	Synaptotagmin-12	Syt12	NaN	NaN	NaN	0	1	NaN	NaN	NaN	NaN	NaN	NaN	NaN	NaN	NaN	NaN	20.6309	1	1	1	3.1	3.1	3.1	46.68	0.0025608	3.7056	30505000	3	0	1	1	1	1	1	1	1	1	0	1	0	0	1	0	0	0	0	0
Q922R8	Q922R8	Protein disulfide-isomerase A6	Pdia6	NaN	NaN	NaN	0	1	NaN	NaN	NaN	NaN	NaN	NaN	NaN	NaN	NaN	NaN	18.8394	1	1	1	3.2	3.2	3.2	48.1	0.0035587	3.0465	5278700	4	1	1	1	1	0	0	0	1	1	1	1	0	0	1	0	0	0	0	0
Q93092	Q93092	Transaldolase	Taldo1	NaN	NaN	NaN	0	1	NaN	NaN	NaN	NaN	NaN	NaN	NaN	NaN	NaN	NaN	20.8499	1	1	1	3.9	3.9	3.9	37.387	0	16.588	19193000	6	0	1	1	0	0	0	0	1	1	1	1	1	0	0	0	0	0	0	0
Q99JG2	Q99JG2	Prosaposin receptor GPR37L1	Gpr37l1	0.916229	-0.12622	NaN	2	4	NaN	22.5012	22.6922	NaN	NaN	NaN	NaN	21.5921	23.598	22.302	22.3897	3	3	3	8.9	8.9	8.9	52.728	0	8.8308	87893000	7	0	2	2	0	1	1	0	2	2	3	2	0	0	1	0	0	0	0	0
Q99K10	Q99K10	Neuroligin-1	Nlgn1	NaN	NaN	NaN	0	1	NaN	NaN	NaN	NaN	NaN	NaN	NaN	NaN	NaN	NaN	20.6468	3	3	1	4.7	4.7	1.7	94.148	0	9.5756	24833000	9	0	0	1	1	1	1	1	1	1	1	1	0	0	1	0	0	0	0	0
Q99KK7	Q99KK7	Dipeptidyl peptidase 3	Dpp3	NaN	NaN	NaN	0	1	NaN	NaN	NaN	NaN	NaN	NaN	NaN	NaN	19.2088	NaN	NaN	1	1	1	3.4	3.4	3.4	82.897	0.0024661	3.4952	6607100	1	0	1	1	0	0	0	0	1	1	0	0	1	0	0	0	0	0	0	0
Q99KP3	Q99KP3	Lambda-crystallin homolog	Cryl1	NaN	NaN	NaN	0	1	NaN	NaN	NaN	NaN	NaN	NaN	NaN	NaN	NaN	19.3356	NaN	1	1	1	5.6	5.6	5.6	35.208	0.0035461	3.0047	4472100	2	0	1	0	0	0	1	0	1	0	1	0	1	0	0	0	0	0	0	0
Q99L47	Q99L47	Hsc70-interacting protein	St13	NaN	NaN	NaN	1	0	NaN	20.4795	NaN	NaN	NaN	NaN	NaN	NaN	NaN	NaN	NaN	2	2	2	6.2	6.2	6.2	41.655	0.0044494	2.4824	7392500	4	0	2	1	1	1	0	0	2	0	1	0	1	0	0	0	0	0	0	0
Q99LD8	Q99LD8	N(G),N(G)-dimethylarginine dimethylaminohydrolase 2	Ddah2	NaN	NaN	NaN	0	1	NaN	NaN	NaN	NaN	NaN	NaN	NaN	19.1717	NaN	NaN	NaN	1	1	1	5.6	5.6	5.6	29.645	0.0013021	3.8699	1932400	0	0	0	0	0	0	0	0	1	0	0	0	1	0	0	1	0	0	0	0
Q99M80	Q99M80	Receptor-type tyrosine-protein phosphatase T	Ptprt	NaN	NaN	NaN	0	1	NaN	NaN	NaN	NaN	NaN	NaN	NaN	NaN	NaN	NaN	20.2233	1	1	1	1.4	1.4	1.4	163.01	0	7.3733	12185000	4	1	0	1	1	0	1	0	0	1	1	1	0	0	1	0	0	0	0	0
Q99MP3	Q99MP3	Calcitonin gene-related peptide 2	Calcb	NaN	NaN	NaN	0	1	NaN	NaN	NaN	NaN	NaN	NaN	NaN	NaN	NaN	NaN	21.0439	1	1	1	13.1	13.1	13.1	14.623	0.0013263	4.0526	40810000	5	1	1	1	1	1	1	1	1	1	1	1	0	0	0	0	0	1	0	0
Q9CPV4	Q9CPV4	Glyoxalase domain-containing protein 4	Glod4	1.01654	0.023665	NaN	2	3	NaN	21.8368	21.8153	NaN	NaN	NaN	NaN	21.3944	21.3614	22.7935	NaN	5	5	5	23.5	23.5	23.5	33.316	0	11.536	42478000	9	0	2	2	1	0	0	0	3	3	5	0	0	0	0	1	0	0	0	0
Q9CQF9	Q9CQF9	Prenylcysteine oxidase	Pcyox1	NaN	NaN	NaN	0	1	NaN	NaN	NaN	NaN	NaN	NaN	NaN	NaN	NaN	NaN	19.4898	2	2	2	6.1	6.1	6.1	56.494	0	7.4196	14047000	5	0	1	1	1	1	0	0	2	1	1	1	0	0	0	0	0	0	1	0
Q9CQW3	Q9CQW3	Vitamin K-dependent protein Z	Proz	NaN	NaN	NaN	0	1	NaN	NaN	NaN	NaN	NaN	NaN	NaN	22.0273	NaN	NaN	NaN	2	2	2	7.3	7.3	7.3	44.304	0	6.6195	13987000	2	0	0	0	0	0	0	0	2	0	0	0	0	0	0	0	0	1	0	0
Q9CR86	Q9CR86	Calcium-regulated heat stable protein 1	Carhsp1	NaN	NaN	NaN	0	1	NaN	NaN	NaN	NaN	NaN	NaN	NaN	NaN	NaN	20.1592	NaN	1	1	1	10.8	10.8	10.8	16.062	0	4.4471	9657800	3	0	1	1	1	0	0	0	1	0	1	0	1	0	0	0	0	0	0	0
Q9CWP6	Q9CWP6	Motile sperm domain-containing protein 2	Mospd2	NaN	NaN	NaN	0	1	NaN	NaN	NaN	NaN	NaN	NaN	NaN	NaN	NaN	NaN	21.8205	1	1	1	2.3	2.3	2.3	59.854	0.0054171	2.1533	23632000	4	1	1	1	1	1	0	0	0	0	0	1	0	0	1	0	0	0	0	0
Q9CXI5	Q9CXI5	Mesencephalic astrocyte-derived neurotrophic factor	Manf	1.17719	0.23535	NaN	1	1	NaN	NaN	NaN	NaN	21.1181	NaN	NaN	NaN	NaN	NaN	21.3535	3	3	3	25.7	25.7	25.7	20.373	0	4.4091	28056000	5	1	1	1	2	2	1	1	1	1	1	2	0	0	0	0	0	1	0	0
Q9CYK2	Q9CYK2	Glutaminyl-peptide cyclotransferase	Qpct	NaN	NaN	NaN	0	1	NaN	NaN	NaN	NaN	NaN	NaN	21.0858	NaN	NaN	NaN	NaN	1	1	1	3.9	3.9	3.9	41.118	0	7.3647	3559700	4	0	0	0	0	1	1	1	0	1	0	1	0	0	0	0	0	1	0	0
Q9D0F3	Q9D0F3	Protein ERGIC-53	Lman1	NaN	NaN	NaN	0	1	NaN	NaN	NaN	NaN	NaN	NaN	NaN	NaN	NaN	21.5862	NaN	2	2	2	6	6	6	57.788	0.0013055	3.918	31848000	4	1	1	1	1	1	1	1	1	1	2	1	0	0	1	0	0	0	0	0
Q9D0J8	Q9D0J8	Parathymosin	Ptms	NaN	NaN	NaN	0	1	NaN	NaN	NaN	NaN	NaN	NaN	NaN	NaN	NaN	NaN	21.6878	1	1	1	10.9	10.9	10.9	11.43	0.003517	2.8852	84622000	4	1	1	1	0	0	0	1	1	0	0	1	0	0	0	0	0	0	1	0
Q9D154	Q9D154	Leukocyte elastase inhibitor A	Serpinb1a	1.10267	0.141	NaN	2	4	NaN	21.4677	20.988	NaN	NaN	NaN	NaN	21.0463	21.1747	21.8955	21.3589	5	5	5	17.4	17.4	17.4	42.574	0	5.9355	34661000	11	0	4	4	1	1	0	2	3	4	4	3	1	0	0	0	0	0	0	0
Q9D164	Q9D164	FXYD domain-containing ion transport regulator 6	Fxyd6	NaN	NaN	NaN	0	1	NaN	NaN	NaN	NaN	NaN	NaN	NaN	NaN	NaN	NaN	20.6855	1	1	1	13.8	13.8	13.8	10.374	0.0024184	3.236	28061000	1	0	1	1	1	1	1	0	0	1	1	1	0	0	1	0	0	0	0	0
Q9D1A2	Q9D1A2	Cytosolic non-specific dipeptidase	Cndp2	NaN	NaN	NaN	1	0	NaN	21.1577	NaN	NaN	NaN	NaN	NaN	NaN	NaN	NaN	NaN	2	2	2	5.1	5.1	5.1	52.767	0.0083682	1.9373	15987000	2	0	2	1	1	0	1	0	1	0	1	0	1	0	0	0	0	0	0	0
Q9D1Q6	Q9D1Q6	Endoplasmic reticulum resident protein 44	Erp44	NaN	NaN	NaN	0	1	NaN	NaN	NaN	NaN	NaN	NaN	NaN	NaN	NaN	NaN	19.5749	1	1	1	3	3	3	46.852	0.0034404	2.7714	12895000	6	0	1	1	1	1	1	1	1	1	1	1	0	0	0	0	0	0	1	0
Q9D3H2	Q9D3H2		Obp1a	4.12303	2.0437	NaN	1	5	NaN	NaN	NaN	21.0902	NaN	NaN	22.9914	23.5885	24.0108	23.6008	21.4782	5	5	5	33.1	33.1	33.1	18.469	0	20.711	130960000	12	0	1	0	2	1	1	2	5	4	4	3	0	0	0	0	0	1	0	0
Q9D3P9	Q9D3P9	Neurotensin/neuromedin N;Large neuromedin N;Neuromedin N;Neurotensin;Tail peptide	Nts	NaN	NaN	NaN	0	1	NaN	NaN	NaN	NaN	NaN	NaN	NaN	NaN	NaN	NaN	21.7568	1	1	1	8.3	8.3	8.3	19.607	0.0053821	2.112	37800000	5	1	1	1	1	1	1	0	0	1	1	1	0	0	0	0	0	1	0	0
Q9D7V9	Q9D7V9	N-acylethanolamine-hydrolyzing acid amidase;N-acylethanolamine-hydrolyzing acid amidase subunit alpha;N-acylethanolamine-hydrolyzing acid amidase subunit beta	Naaa	1.34196	0.424343	NaN	1	4	NaN	19.9357	NaN	NaN	NaN	NaN	NaN	19.3388	19.9492	21.5578	20.5946	2	2	2	8.6	8.6	8.6	40.074	0.004415	2.365	18895000	4	0	2	1	1	1	1	0	2	2	2	2	0	0	0	0	0	0	1	0
Q9D892	Q9D892	Inosine triphosphate pyrophosphatase	Itpa	NaN	NaN	NaN	0	1	NaN	NaN	NaN	NaN	NaN	NaN	NaN	NaN	NaN	NaN	19.8352	1	1	1	5.6	5.6	5.6	21.897	0.0035885	3.1048	15863000	2	0	1	1	1	0	1	1	1	0	1	1	1	0	0	0	0	0	0	0
Q9DBF1	Q9DBF1	Alpha-aminoadipic semialdehyde dehydrogenase	Aldh7a1	0.986862	-0.01908	NaN	2	2	NaN	21.6506	21.9084	NaN	NaN	NaN	NaN	NaN	21.2548	22.266	NaN	4	4	4	11.5	11.5	11.5	58.861	0	8.0447	30483000	8	0	4	2	0	0	1	0	1	2	4	0	1	1	0	1	0	0	0	0
Q9DBV4	Q9DBV4	Matrix-remodeling-associated protein 8	Mxra8	NaN	NaN	NaN	1	0	NaN	NaN	NaN	NaN	NaN	20.3847	NaN	NaN	NaN	NaN	NaN	2	2	2	4.8	4.8	4.8	49.75	0.0024876	3.5522	9806000	4	1	1	1	1	1	1	0	0	1	0	0	0	0	1	0	0	0	0	0
Q9DD18	Q9DD18	D-tyrosyl-tRNA(Tyr) deacylase 1	Dtd1	NaN	NaN	NaN	0	1	NaN	NaN	NaN	NaN	NaN	NaN	NaN	NaN	NaN	NaN	20.4277	1	1	1	7.2	7.2	7.2	23.384	0	5.7941	25631000	2	0	1	1	1	1	0	1	1	1	1	1	1	1	0	0	0	0	0	0
Q9EPR5	Q9EPR5	VPS10 domain-containing receptor SorCS2	Sorcs2	NaN	NaN	NaN	0	1	NaN	NaN	NaN	NaN	NaN	NaN	NaN	22.6936	NaN	NaN	NaN	2	2	2	3.1	3.1	3.1	128.9	0.0044843	2.5341	30882000	2	0	0	0	0	0	0	1	2	1	1	1	0	0	1	0	0	0	0	0
Q9EQ21;Q80T19	Q9EQ21;Q80T19	Hepcidin;Hepcidin-2	Hamp;Hamp2	1.20718	0.271645	NaN	2	2	NaN	NaN	NaN	21.6201	21.5006	NaN	NaN	20.4904	NaN	23.1735	NaN	3	3	3	42.2	42.2	42.2	9.352	0	4.4761	43597000	8	1	1	1	2	2	1	1	2	1	3	1	0	0	0	0	0	1	0	0
Q9EQS9	Q9EQS9	Immunoglobulin superfamily DCC subclass member 4	Igdcc4	NaN	NaN	NaN	0	1	NaN	NaN	NaN	NaN	NaN	NaN	NaN	NaN	NaN	18.6727	NaN	1	1	1	1.3	1.3	1.3	134.76	0.0093264	1.8639	4638200	3	0	1	1	1	0	1	0	0	1	1	0	0	0	1	0	0	0	0	0
Q9ER65	Q9ER65	Calsyntenin-2	Clstn2	NaN	NaN	NaN	0	1	NaN	NaN	NaN	NaN	NaN	NaN	NaN	NaN	NaN	NaN	19.0169	1	1	1	1.3	1.3	1.3	107.89	0.0024213	3.239	7457500	4	0	1	0	1	1	0	0	1	1	1	1	0	0	1	0	0	0	0	0
Q9JHA8	Q9JHA8	von Willebrand factor A domain-containing protein 7	Vwa7	NaN	NaN	NaN	0	1	NaN	NaN	NaN	NaN	NaN	NaN	19.4481	NaN	NaN	NaN	NaN	2	2	2	2.2	2.2	2.2	95.982	0.0084211	1.9801	6435100	2	1	1	0	0	0	2	1	0	0	0	0	0	0	0	0	0	1	0	0
Q9JHG0	Q9JHG0	Cerebellin-3	Cbln3	NaN	NaN	NaN	3	0	23.2388	NaN	NaN	NaN	22.6198	22.6324	NaN	NaN	NaN	NaN	NaN	2	2	2	13.2	13.2	13.2	21.077	0	4.7135	44983000	5	2	0	1	1	2	2	1	1	1	0	0	0	0	0	0	0	1	0	0
Q9JHN8	Q9JHN8	Serine/threonine-protein kinase 19	Stk19	NaN	NaN	NaN	0	1	NaN	NaN	NaN	NaN	NaN	NaN	NaN	NaN	NaN	NaN	23.1889	1	1	1	3.5	3.5	3.5	28.103	0.0054113	2.1432	192610000	9	1	1	1	1	1	1	1	1	1	1	1	0	1	0	0	0	0	0	0
Q9JHU9	Q9JHU9	Inositol-3-phosphate synthase 1	Isyna1	NaN	NaN	NaN	0	1	NaN	NaN	NaN	NaN	NaN	NaN	NaN	NaN	NaN	20.0885	NaN	1	1	1	2.3	2.3	2.3	60.931	0.00246	3.4458	6134800	4	0	1	1	0	0	0	0	1	1	1	0	1	0	0	0	0	0	0	0
Q9JI46	Q9JI46	Diphosphoinositol polyphosphate phosphohydrolase 1	Nudt3	NaN	NaN	NaN	0	1	NaN	NaN	NaN	NaN	NaN	NaN	NaN	NaN	NaN	18.9468	NaN	1	1	1	8.3	8.3	8.3	19.029	0.0093458	1.8767	963290	1	0	0	0	0	0	0	0	0	0	1	0	1	0	0	0	0	0	0	0
Q9JJ61	Q9JJ61	Polypeptide N-acetylgalactosaminyltransferase 16	Galnt16	0.491313	-1.02529	NaN	2	2	NaN	23.6039	20.9756	NaN	NaN	NaN	NaN	21.1672	NaN	NaN	21.3617	2	2	2	4.1	4.1	4.1	62.874	0	4.5273	87033000	12	1	2	2	1	1	1	1	2	1	1	2	0	0	1	0	0	0	0	0
Q9JJH1	Q9JJH1	Ribonuclease 4	Rnase4	NaN	NaN	NaN	0	4	NaN	NaN	NaN	NaN	NaN	NaN	NaN	22.5527	21.9715	22.0858	22.7314	3	3	3	16.9	16.9	16.9	17.024	0	9.8753	56880000	8	0	1	1	1	1	0	0	3	2	2	2	0	0	0	0	0	1	0	0
Q9JKF6	Q9JKF6	Nectin-1	Pvrl1	NaN	NaN	NaN	0	1	NaN	NaN	NaN	NaN	NaN	NaN	NaN	NaN	NaN	NaN	21.36	1	1	1	2.7	2.7	2.7	57.034	0.0025031	3.5812	33229000	5	1	1	1	1	1	0	0	1	1	1	1	0	0	1	0	0	0	0	0
Q9QWK4	Q9QWK4	CD5 antigen-like	Cd5l	NaN	NaN	NaN	0	1	NaN	NaN	NaN	NaN	NaN	NaN	NaN	NaN	NaN	NaN	19.1734	1	1	1	3.1	3.1	3.1	38.862	0.0093071	1.8609	10353000	1	0	1	0	0	1	0	0	1	0	1	1	1	0	0	0	0	1	0	0
Q9QYG0	Q9QYG0	Protein NDRG2	Ndrg2	NaN	NaN	NaN	0	3	NaN	NaN	NaN	NaN	NaN	NaN	NaN	20.4525	20.1296	21.1555	NaN	3	3	3	12.1	12.1	12.1	40.789	0	10.373	21018000	5	1	0	1	2	0	0	1	2	2	2	0	1	0	0	0	0	0	0	0
Q9QZZ6	Q9QZZ6	Dermatopontin	Dpt	NaN	NaN	NaN	0	1	NaN	NaN	NaN	NaN	NaN	NaN	NaN	NaN	NaN	NaN	23.3397	1	1	1	5.5	5.5	5.5	23.995	0.0034364	2.7617	186550000	6	1	1	1	1	1	1	1	1	1	1	1	0	0	0	0	1	1	0	0
Q9R013	Q9R013	Cathepsin F	Ctsf	NaN	NaN	NaN	0	2	NaN	NaN	NaN	NaN	NaN	NaN	NaN	21.0177	NaN	21.4893	NaN	2	2	2	8.4	8.4	8.4	51.66	0.0025641	3.7094	25679000	2	0	1	1	1	1	0	0	2	1	2	1	0	0	0	0	0	0	1	0
Q9R0E1	Q9R0E1	Procollagen-lysine,2-oxoglutarate 5-dioxygenase 3	Plod3	1.23416	0.303527	NaN	2	3	NaN	20.6325	20.7099	NaN	NaN	NaN	NaN	20.3863	21.0731	21.4648	NaN	4	4	4	8.8	8.8	8.8	84.921	0	7.2952	26497000	7	0	3	2	1	1	1	0	2	4	4	1	0	0	1	0	0	0	0	0
Q9R0N7	Q9R0N7	Synaptotagmin-7	Syt7	0.760263	-0.39543	NaN	1	1	NaN	NaN	NaN	NaN	20.577	NaN	NaN	NaN	20.1816	NaN	NaN	2	2	2	3.5	3.5	3.5	45.472	0.0093652	1.8814	14409000	2	1	1	1	1	2	0	1	1	2	1	1	0	0	1	0	0	0	0	0
Q9R0P5	Q9R0P5	Destrin	Dstn	0.559955	-0.836618	NaN	2	3	NaN	22.6541	22.1371	NaN	NaN	NaN	NaN	21.7795	20.7538	22.1437	NaN	3	3	3	21.8	21.8	21.8	18.521	0	10.135	49166000	6	0	3	2	1	0	1	1	3	2	2	0	0	0	0	0	0	0	1	0
Q9R0P9	Q9R0P9	Ubiquitin carboxyl-terminal hydrolase isozyme L1	Uchl1	1.48915	0.574485	NaN	2	2	NaN	20.8251	23.5282	NaN	NaN	NaN	NaN	NaN	21.8767	23.6256	NaN	3	3	3	22	22	22	24.838	0	8.7934	59566000	6	0	2	3	1	0	0	1	0	2	3	1	1	0	1	0	0	0	0	0
Q9R0Q7	Q9R0Q7	Prostaglandin E synthase 3	Ptges3	1.48469	0.57016	NaN	1	2	NaN	NaN	21.0763	NaN	NaN	NaN	NaN	21.8431	NaN	21.4498	NaN	2	2	2	18.8	18.8	18.8	18.721	0.0025284	3.6668	26622000	5	1	1	2	0	0	1	0	2	2	2	0	1	0	0	0	0	0	0	0
Q9R0Y5	Q9R0Y5	Adenylate kinase isoenzyme 1	Ak1	6.82515	2.77086	NaN	1	1	21.2489	NaN	NaN	NaN	NaN	NaN	NaN	24.0198	NaN	NaN	NaN	5	5	5	40.7	40.7	40.7	21.539	0	33.343	67605000	9	2	1	1	1	0	1	0	5	1	1	0	1	0	0	0	0	0	0	0
Q9R1P3	Q9R1P3	Proteasome subunit beta type-2	Psmb2	NaN	NaN	NaN	0	1	NaN	NaN	NaN	NaN	NaN	NaN	NaN	NaN	NaN	NaN	23.9162	1	1	1	3.5	3.5	3.5	22.906	0.0085288	2.0366	138620000	4	1	1	1	1	1	0	1	1	1	1	1	1	1	0	0	0	0	0	0
Q9R1V7	Q9R1V7	Disintegrin and metalloproteinase domain-containing protein 23	Adam23	NaN	NaN	NaN	0	1	NaN	NaN	NaN	NaN	NaN	NaN	NaN	NaN	21.1722	NaN	NaN	2	2	2	4.3	4.3	4.3	91.547	0	7.8504	35963000	2	0	1	1	1	1	1	0	1	2	0	0	0	0	1	0	0	1	0	0
Q9WTX5	Q9WTX5	S-phase kinase-associated protein 1	Skp1	1.06103	0.085465	NaN	2	2	NaN	21.1275	21.455	NaN	NaN	NaN	NaN	NaN	21.0564	21.6971	NaN	2	2	2	16	16	16	18.672	0.0034522	2.7864	30245000	7	1	2	2	1	1	1	1	1	2	2	1	0	0	0	0	0	0	1	0
Q9WVA4;Q9R1Q8	Q9WVA4;Q9R1Q8	Transgelin-2;Transgelin-3	Tagln2;Tagln3	NaN	NaN	NaN	2	0	NaN	20.9712	21.4421	NaN	NaN	NaN	NaN	NaN	NaN	NaN	NaN	2	2	2	12.6	12.6	12.6	22.395	0.0025253	3.6606	12710000	2	0	2	2	0	0	0	0	1	0	1	0	0	0	0	0	0	0	1	0
Q9Z0M9	Q9Z0M9	Interleukin-18-binding protein	Il18bp	NaN	NaN	NaN	0	1	NaN	NaN	NaN	NaN	NaN	NaN	NaN	NaN	NaN	NaN	20.7699	1	1	1	6.2	6.2	6.2	21.257	0	7.9294	32776000	11	1	1	1	1	1	1	1	1	1	1	1	0	0	0	0	0	1	0	0
Q9Z1R3	Q9Z1R3	Apolipoprotein M	Apom	NaN	NaN	NaN	0	1	NaN	NaN	NaN	NaN	NaN	NaN	NaN	23.7096	NaN	NaN	NaN	3	3	3	19.5	19.5	19.5	21.273	0	7.0572	62071000	4	0	1	0	1	1	1	1	3	1	1	1	0	0	0	0	0	1	0	0
Q9Z1W4	Q9Z1W4	Growth/differentiation factor 11	Gdf11	NaN	NaN	NaN	0	1	NaN	NaN	NaN	NaN	NaN	NaN	NaN	NaN	NaN	NaN	18.7754	1	1	1	2.5	2.5	2.5	44.946	0.0033784	2.5895	4131200	2	0	1	1	0	0	0	0	0	1	1	1	0	0	0	0	0	1	0	0
Q9Z218;REV__Q9CXP8	Q9Z218;REV__Q9CXP8	Dipeptidyl aminopeptidase-like protein 6	Dpp6	NaN	NaN	NaN	0	3	NaN	NaN	NaN	NaN	NaN	NaN	NaN	NaN	19.6768	20.1929	20.0849	2	2	2	2.2	2.2	2.2	91.259	0	7.223	14652000	1	1	1	1	0	1	0	1	1	2	2	2	0	0	1	0	0	0	0	0
Q9Z2U1	Q9Z2U1	Proteasome subunit alpha type-5	Psma5	NaN	NaN	NaN	0	1	NaN	NaN	NaN	NaN	NaN	NaN	NaN	NaN	NaN	21.2919	NaN	2	2	2	12.9	12.9	12.9	26.411	0.0034642	2.7963	9667500	2	1	1	1	1	1	1	0	1	1	1	1	1	1	0	0	0	0	0	0
Q61696;P17879	Q61696;P17879	Heat shock 70 kDa protein 1A;Heat shock 70 kDa protein 1B	Hspa1a;Hspa1b	0.375265	-1.41402	NaN	3	1	24.7582	23.6742	23.7213	NaN	NaN	NaN	NaN	22.6372	NaN	NaN	NaN	5	3	2	12.2	8.4	6.6	70.078	0	23.905	220550000	8	2	2	2	1	1	1	1	2	1	1	1	1	0	0	0	0	0	0	0
P34884	P34884	Macrophage migration inhibitory factor	Mif	1.27185	0.34693	NaN	4	1	22.6659	22.229	22.4221	NaN	21.929	NaN	NaN	NaN	NaN	22.6584	NaN	2	2	2	17.4	17.4	17.4	12.504	0	36.978	82410000	6	2	2	2	1	2	1	0	1	1	2	1	1	0	0	0	0	1	0	0
P35454	P35454	Oxytocin-neurophysin 1;Oxytocin;Neurophysin 1	Oxt	0.766712	-0.383242	NaN	4	1	22.345	22.7336	NaN	NaN	22.6628	23.042	NaN	NaN	NaN	NaN	22.3126	4	2	2	54.4	17.6	17.6	12.851	0	5.9273	63422000	15	2	2	1	1	2	2	1	1	1	1	2	0	0	0	0	0	0	1	0
P51150	P51150	Ras-related protein Rab-7a	Rab7a	0.838049	-0.254893	NaN	3	1	21.8931	NaN	NaN	21.5273	NaN	21.9998	NaN	NaN	21.5518	NaN	NaN	2	2	2	12.1	12.1	12.1	23.489	0.0036188	3.1486	33373000	4	2	1	1	2	1	2	1	1	2	1	1	0	0	1	0	0	0	0	0
P62500	P62500	TSC22 domain family protein 1	Tsc22d1	1.6766	0.74554	NaN	3	1	NaN	22.1936	22.3041	20.9099	NaN	NaN	NaN	NaN	NaN	22.5481	NaN	2	2	2	2.1	2.1	2.1	109.81	0.0024783	3.5394	45594000	4	1	2	2	2	1	1	1	1	1	2	0	1	1	0	0	0	0	0	0
Q9DBB9	Q9DBB9	Carboxypeptidase N subunit 2	Cpn2	0.325035	-1.62133	NaN	6	1	23.7161	23.6462	22.9402	23.9198	23.9288	23.6807	NaN	22.0173	NaN	NaN	NaN	5	5	5	11.2	11.2	11.2	60.478	0	14.876	125190000	16	4	4	5	5	4	5	0	3	0	0	0	0	0	0	0	0	1	0	0
Q9QY40	Q9QY40	Plexin-B3	Plxnb3	0.818705	-0.288585	NaN	4	1	NaN	20.1938	20.1831	20.0675	20.5748	NaN	NaN	NaN	NaN	19.9662	NaN	3	3	3	1.7	1.7	1.7	208.36	0.0025063	3.5893	14986000	4	1	2	2	2	2	1	0	1	2	2	1	0	0	1	0	0	0	0	0
Q9R1V4	Q9R1V4	Disintegrin and metalloproteinase domain-containing protein 11	Adam11	1.03546	0.0502667	NaN	3	1	NaN	20.6842	20.2271	20.6236	NaN	NaN	NaN	NaN	NaN	20.5619	NaN	2	2	2	4.3	4.3	4.3	84.134	0.0034286	2.7111	19492000	3	0	2	2	2	1	0	1	1	1	2	1	0	0	1	0	0	0	0	0
Q9Z121	Q9Z121	C-C motif chemokine 8	Ccl8	0.64368	-0.635583	NaN	3	1	NaN	20.5931	20.9458	NaN	20.9052	NaN	NaN	20.1791	NaN	NaN	NaN	1	1	1	16.5	16.5	16.5	11.017	0.0025674	3.7168	17874000	2	0	1	1	1	1	1	1	1	1	0	0	0	0	0	0	0	1	0	0
[truncated: 6 more columns]

## Sheet: Volcano
Protein IDs	Majority protein IDs	Protein names	Gene names	Ratio	Log2 (dKO/Bace1KO)	minus log10 p	p-value
Q62000	Q62000	Mimecan	Ogn	0.523479	-0.933798	4.83395	1.46572e-05
P21180	P21180	Complement C2;Complement C2b fragment;Complement C2a fragment	C2	0.599539	-0.738075	4.34442	4.52465e-05
O88188	O88188	Lymphocyte antigen 86	Ly86	0.514221	-0.959541	3.69419	0.000202215
P12961	P12961	Neuroendocrine protein 7B2;N-terminal peptide;C-terminal peptide	Scg5	0.337028	-1.56906	3.56587	0.000271723
P97290;CON__P50448	P97290	Plasma protease C1 inhibitor	Serping1	0.739141	-0.436078	3.27337	0.000532875
P20060	P20060	Beta-hexosaminidase subunit beta	Hexb	0.622165	-0.684631	2.84054	0.00144364
O09159	O09159	Lysosomal alpha-mannosidase	Man2b1	0.551792	-0.857803	2.82277	0.00150394
Q61809	Q61809	Leucine-rich repeat neuronal protein 1	Lrrn1	0.494886	-1.01483	2.72516	0.00188297
Q91WP6;Q5I2A0;Q6P4P1	Q91WP6	Serine protease inhibitor A3N	Serpina3n	1.77925	0.831265	2.70395	0.00197719
Q62356	Q62356	Follistatin-related protein 1	Fstl1	0.545865	-0.873384	2.69888	0.00200043
P10493	P10493	Nidogen-1	Nid1	0.646527	-0.629217	2.67676	0.00210496
O54901	O54901	OX-2 membrane glycoprotein	Cd200	0.488576	-1.03335	2.63829	0.0022999
P27090	P27090	Transforming growth factor beta-2;Latency-associated peptide	Tgfb2	0.582132	-0.780583	2.56931	0.00269583
P82198	P82198	Transforming growth factor-beta-induced protein ig-h3	Tgfbi	0.684861	-0.546116	2.52735	0.00296927
P01864	P01864	Ig gamma-2A chain C region secreted form		6.54042	2.70938	2.37247	0.0042416
P50608	P50608	Fibromodulin	Fmod	0.640646	-0.6424	2.34927	0.00447433
P97927	P97927	Laminin subunit alpha-4	Lama4	0.693751	-0.527509	2.33863	0.00458529
Q9Z1T2;CON__ENSEMBL:ENSBTAP00000006074;Q9R0G6	Q9Z1T2	Thrombospondin-4	Thbs4	0.594107	-0.751205	2.22254	0.00599044
Q8K4G1	Q8K4G1	Latent-transforming growth factor beta-binding protein 4	Ltbp4	0.547214	-0.869823	2.19701	0.00635316
Q61112	Q61112	45 kDa calcium-binding protein	Sdf4	0.587274	-0.767894	2.19303	0.0064117
Q8VDN2;Q6PIC6;Q6PIE5;Q9WV27;Q64436	Q8VDN2;Q6PIC6;Q6PIE5	Sodium/potassium-transporting ATPase subunit alpha-1;Sodium/potassium-transporting ATPase subunit alpha-3;Sodium/potassium-transporting ATPase subunit alpha-2	Atp1a1;Atp1a3;Atp1a2	0.515251	-0.956653	2.17722	0.00664934
Q03734	Q03734	Serine protease inhibitor A3M	Serpina3m	4.68608	2.22838	2.13838	0.00727144
P09535	P09535	Insulin-like growth factor II;Insulin-like growth factor II;Preptin	Igf2	0.690952	-0.533343	2.09639	0.0080096
P05201	P05201	Aspartate aminotransferase, cytoplasmic	Got1	1.29656	0.374693	2.09467	0.00804142
Q6GU68	Q6GU68	Immunoglobulin superfamily containing leucine-rich repeat protein	Islr	0.619039	-0.691897	2.00767	0.00982491
Q5MJS3;Q8CID3	Q5MJS3	Extracellular serine/threonine protein kinase FAM20C	Fam20c	0.771384	-0.374479	2.00131	0.00996989
Q9DC11	Q9DC11	Plexin domain-containing protein 2	Plxdc2	0.566137	-0.820778	1.96056	0.0109505
P70663	P70663	SPARC-like protein 1	Sparcl1	0.71595	-0.48207	1.94742	0.011287
P09470	P09470	Angiotensin-converting enzyme;Angiotensin-converting enzyme, soluble form	Ace	0.682208	-0.551716	1.94258	0.0114136
O88593	O88593	Peptidoglycan recognition protein 1	Pglyrp1	1.61906	0.695153	1.89933	0.0126087
P01878	P01878	Ig alpha chain C region		3.4924	1.80422	1.89544	0.0127222
Q04857	Q04857	Collagen alpha-1(VI) chain	Col6a1	0.646949	-0.628276	1.84615	0.0142512
Q91V98	Q91V98	Endosialin	Cd248	0.598277	-0.741115	1.83086	0.014762
Q9ET66	Q9ET66	Peptidase inhibitor 16	Pi16	0.694543	-0.525863	1.7638	0.0172265
Q61207	Q61207	Prosaposin	Psap	0.755472	-0.40455	1.7583	0.0174461
Q04646	Q04646	Sodium/potassium-transporting ATPase subunit gamma	Fxyd2	0.722516	-0.468899	1.74321	0.0180628
O09114	O09114	Prostaglandin-H2 D-isomerase	Ptgds	0.593288	-0.753194	1.74243	0.0180954
P01868;P01869	P01868;P01869	Ig gamma-1 chain C region secreted form;Ig gamma-1 chain C region, membrane-bound form	Ighg1	4.85955	2.28082	1.71275	0.0193751
Q9Z0L8	Q9Z0L8	Gamma-glutamyl hydrolase	Ggh	1.44632	0.532386	1.69714	0.0200845
Q640N1;Q9D2L5	Q640N1	Adipocyte enhancer-binding protein 1	Aebp1	0.423751	-1.23871	1.68193	0.0208001
P47877	P47877	Insulin-like growth factor-binding protein 2	Igfbp2	0.694661	-0.525618	1.673	0.0212326
P08226;CON__Q03247;Q8VHG0	P08226	Apolipoprotein E	Apoe	0.720725	-0.47248	1.66156	0.0217992
Q8VCM7	Q8VCM7	Fibrinogen gamma chain	Fgg	2.41128	1.2698	1.64966	0.0224047
Q9D6X6	Q9D6X6	Serine protease 23	Prss23	0.587525	-0.767278	1.6278	0.0235614
B2RXS4	B2RXS4	Plexin-B2	Plxnb2	0.585547	-0.772142	1.62366	0.0237872
P35951	P35951	Low-density lipoprotein receptor	Ldlr	0.643773	-0.635375	1.60138	0.025039
P08121;CON__P04258	P08121	Collagen alpha-1(III) chain	Col3a1	0.537787	-0.894894	1.58872	0.0257801
P03987	P03987	Ig gamma-3 chain C region		0.342657	-1.54516	1.57823	0.0264099
P68134;P68033;P62737;P63268	P68134;P68033;P62737;P63268	Actin, alpha skeletal muscle;Actin, alpha cardiac muscle 1;Actin, aortic smooth muscle;Actin, gamma-enteric smooth muscle	Acta1;Actc1;Acta2;Actg2	2.02553	1.0183	1.54472	0.0285285
Q00724	Q00724	Retinol-binding protein 4	Rbp4	0.633819	-0.657857	1.53724	0.0290239
P02468	P02468	Laminin subunit gamma-1	Lamc1	0.691604	-0.531983	1.52278	0.0300069
Q61805	Q61805	Lipopolysaccharide-binding protein	Lbp	0.628527	-0.669953	1.50416	0.0313216
Q00897	Q00897	Alpha-1-antitrypsin 1-4	Serpina1d	2.54984	1.3504	1.49726	0.0318226
P97821	P97821	Dipeptidyl peptidase 1;Dipeptidyl peptidase 1 exclusion domain chain;Dipeptidyl peptidase 1 heavy chain;Dipeptidyl peptidase 1 light chain	Ctsc	1.64546	0.718494	1.49657	0.0318737
Q9WVJ3	Q9WVJ3	Carboxypeptidase Q	Cpq	0.692381	-0.530362	1.49254	0.0321709
P48299	P48299	Endothelin-3	Edn3	0.50522	-0.985016	1.48891	0.0324407
Q8R121	Q8R121	Protein Z-dependent protease inhibitor	Serpina10	2.14002	1.09763	1.47664	0.0333704
P06728;CON__Q32PJ2;REV__Q9JIW4;P27545;Q62036	P06728	Apolipoprotein A-IV	Apoa4	0.449595	-1.1533	1.47632	0.0333952
Q9JME9	Q9JME9	V-set and transmembrane domain-containing protein 2B	Vstm2b	1.29742	0.375648	1.42467	0.0376121
Q61282	Q61282	Aggrecan core protein	Acan	0.729467	-0.455086	1.41738	0.0382491
Q05793	Q05793	Basement membrane-specific heparan sulfate proteoglycan core protein;Endorepellin;LG3 peptide	Hspg2	0.730078	-0.453878	1.4153	0.0384322
Q61330	Q61330	Contactin-2	Cntn2	0.69089	-0.533471	1.40533	0.0393255
Q07797	Q07797	Galectin-3-binding protein	Lgals3bp	0.642735	-0.637704	1.40414	0.0394334
Q9Z1Q5	Q9Z1Q5	Chloride intracellular channel protein 1	Clic1	0.629534	-0.667645	1.38523	0.0411877
E9PUL5	E9PUL5	Proline-rich transmembrane protein 2	Prrt2	0.661565	-0.596045	1.35196	0.0444675
Q61292	Q61292	Laminin subunit beta-2	Lamb2	0.699036	-0.516561	1.34468	0.0452191
P62984;P62983;P0CG49;P0CG50	P62984;P62983;P0CG49;P0CG50	Ubiquitin-60S ribosomal protein L40;Ubiquitin;60S ribosomal protein L40;Ubiquitin-40S ribosomal protein S27a;Ubiquitin;40S ribosomal protein S27a;Polyubiquitin-B;Ubiquitin;Polyubiquitin-C;Ubiquitin;Ubiquitin-related 1;Ubiquitin-related 2	Uba52;Rps27a;Ubb;Ubc	0.752443	-0.410345	1.33696	0.0460302
P80560	P80560	Receptor-type tyrosine-protein phosphatase N2	Ptprn2	0.600478	-0.735818	1.33204	0.0465547
P37889	P37889	Fibulin-2	Fbln2	0.652735	-0.61543	1.33183	0.0465767
P32648	P32648	VIP peptides;Intestinal peptide PHI-42;Intestinal peptide PHI-27;Vasoactive intestinal peptide	Vip	0.606256	-0.722001	1.3238	0.0474459
Q7TMR0	Q7TMR0	Lysosomal Pro-X carboxypeptidase	Prcp	1.31754	0.397842	1.32222	0.0476185
P46460	P46460	Vesicle-fusing ATPase	Nsf	0.759696	-0.396505	1.30593	0.049439
Q8K0E8;CON__P02676	Q8K0E8	Fibrinogen beta chain;Fibrinopeptide B;Fibrinogen beta chain	Fgb	2.38671	1.25502	1.30318	0.0497535
P01671;P01673;P01672;P01670;P01668;P01663;P01662;P03977;P01669;P01667;P01666;P01665;P01664;P01660;P01657;P01656;P01654;P01659;P01655;P01661	P01671;P01673;P01672;P01670	Ig kappa chain V-III region PC 7175;Ig kappa chain V-III region PC 2485/PC 4039;Ig kappa chain V-III region PC 7940;Ig kappa chain V-III region PC 6684		2.46543	1.30184	1.29875	0.0502636
O88783	O88783	Coagulation factor V;Coagulation factor V heavy chain;Coagulation factor V light chain	F5	0.825636	-0.276423	1.28557	0.0518126
Q9CZT5	Q9CZT5	Vasorin	Vasn	0.656383	-0.60739	1.2794	0.0525536
Q61147;CON__ENSEMBL:ENSBTAP00000031900	Q61147	Ceruloplasmin	Cp	1.30462	0.383632	1.26183	0.0547232
Q71KU9	Q71KU9	Fibrinogen-like protein 1	Fgl1	2.33838	1.22551	1.23629	0.058038
P47867	P47867	Secretogranin-3	Scg3	0.716821	-0.480315	1.21507	0.0609435
Q07079	Q07079	Insulin-like growth factor-binding protein 5	Igfbp5	0.817656	-0.290434	1.21106	0.0615092
P20029	P20029	78 kDa glucose-regulated protein	Hspa5	0.830435	-0.26806	1.20691	0.0620996
Q99M71	Q99M71	Mammalian ependymin-related protein 1	Epdr1	1.48232	0.567855	1.19967	0.0631435
Q8BYM5	Q8BYM5	Neuroligin-3	Nlgn3	0.703492	-0.507394	1.16754	0.0679925
P23953;Q8VCT4	P23953	Carboxylesterase 1C	Ces1c	1.60891	0.686086	1.16114	0.0690014
P09581	P09581	Macrophage colony-stimulating factor 1 receptor	Csf1r	0.733319	-0.447487	1.15966	0.069238
Q00898	Q00898	Alpha-1-antitrypsin 1-5	Serpina1e	5.26239	2.39572	1.15284	0.0703335
Q8K1B9	Q8K1B9	Polypeptide N-acetylgalactosaminyltransferase 18	Galnt18	0.806747	-0.309812	1.15206	0.0704601
P46412;P21765	P46412	Glutathione peroxidase 3	Gpx3	1.68137	0.74964	1.15108	0.0706186
P16125;P00342	P16125	L-lactate dehydrogenase B chain	Ldhb	0.709784	-0.494548	1.14983	0.070823
O55241	O55241	Orexin;Orexin-A;Orexin-B	Hcrt	0.575677	-0.796668	1.1482	0.0710888
P28798	P28798	Granulins;Acrogranin;Granulin-1;Granulin-2;Granulin-3;Granulin-4;Granulin-5;Granulin-6;Granulin-7	Grn	0.820646	-0.285168	1.14618	0.0714203
P49182;CON__ENSEMBL:ENSBTAP00000018574	P49182	Heparin cofactor 2	Serpind1	0.83914	-0.253017	1.14536	0.0715552
Q61790	Q61790	Lymphocyte activation gene 3 protein	Lag3	0.64794	-0.626069	1.14257	0.0720163
A6X935;CON__Q3T052	A6X935	Inter alpha-trypsin inhibitor, heavy chain 4	Itih4	2.41016	1.26913	1.13534	0.0732258
Q9R118	Q9R118	Serine protease HTRA1	Htra1	0.748972	-0.417017	1.13516	0.0732556
P08905;P17897	P08905;P17897	Lysozyme C-2;Lysozyme C-1	Lyz2;Lyz1	0.678487	-0.559606	1.12635	0.0747568
Q8CIZ8	Q8CIZ8	von Willebrand factor;von Willebrand antigen 2	Vwf	1.76622	0.820664	1.12159	0.0755807
Q61581	Q61581	Insulin-like growth factor-binding protein 7	Igfbp7	1.1459	0.196484	1.10634	0.0782809
P47880	P47880	Insulin-like growth factor-binding protein 6	Igfbp6	0.752798	-0.409665	1.09221	0.080871
Q8R0P4	Q8R0P4	Mth938 domain-containing protein	Aamdc	0.644894	-0.632865	1.08777	0.081702
Q02105	Q02105	Complement C1q subcomponent subunit C	C1qc	0.833505	-0.262737	1.07849	0.0834659
Q9CQ01	Q9CQ01	Ribonuclease T2	Rnaset2	0.784378	-0.350378	1.04947	0.0892343
Q9CRB6	Q9CRB6	Tubulin polymerization-promoting protein family member 3	Tppp3	0.630244	-0.666017	1.03351	0.0925749
P56376	P56376	Acylphosphatase-1	Acyp1	0.650166	-0.62112	1.03295	0.0926931
O35684	O35684	Neuroserpin	Serpini1	0.707335	-0.499534	1.02899	0.0935436
Q62165	Q62165	Dystroglycan;Alpha-dystroglycan;Beta-dystroglycan	Dag1	0.749754	-0.41551	1.02504	0.0943966
P97291	P97291	Cadherin-8	Cdh8	0.580177	-0.785435	1.02447	0.094521
P56942	P56942	Pro-MCH;Neuropeptide-glycine-glutamic acid;Neuropeptide-glutamic acid-isoleucine;Melanin-concentrating hormone	Pmch	0.620677	-0.688086	1.01543	0.0965097
P01867	P01867	Ig gamma-2B chain C region	Igh-3	2.19239	1.13251	1.00915	0.0979141
P12246	P12246	Serum amyloid P-component	Apcs	2.69801	1.43189	1.00868	0.0980208
Q9WVJ9	Q9WVJ9	EGF-containing fibulin-like extracellular matrix protein 2	Efemp2	0.771824	-0.373657	0.987916	0.102822
E9PV24	E9PV24	Fibrinogen alpha chain;Fibrinopeptide A;Fibrinogen alpha chain	Fga	2.18551	1.12797	0.985494	0.103396
P35822	P35822	Receptor-type tyrosine-protein phosphatase kappa	Ptprk	0.757242	-0.401174	0.983551	0.10386
P00687;CON__Q3MHH8	P00687	Alpha-amylase 1	Amy1	1.28763	0.36472	0.970356	0.107064
Q9R0M0	Q9R0M0	Cadherin EGF LAG seven-pass G-type receptor 2	Celsr2	1.33435	0.41614	0.967672	0.107728
Q91ZX7;Q9JI18	Q91ZX7	Prolow-density lipoprotein receptor-related protein 1;Low-density lipoprotein receptor-related protein 1 85 kDa subunit;Low-density lipoprotein receptor-related protein 1 515 kDa subunit;Low-density lipoprotein receptor-related protein 1 intracellular domain	Lrp1	0.778047	-0.362071	0.961702	0.109219
P16675	P16675	Lysosomal protective protein;Lysosomal protective protein 32 kDa chain;Lysosomal protective protein 20 kDa chain	Ctsa	0.817731	-0.290301	0.96111	0.109368
Q8BJD1	Q8BJD1	Inter-alpha-trypsin inhibitor heavy chain H5	Itih5	0.831073	-0.266953	0.954769	0.110976
P25785	P25785	Metalloproteinase inhibitor 2	Timp2	0.724555	-0.464833	0.954619	0.111015
Q3U4G3	Q3U4G3	Xyloside xylosyltransferase 1	Xxylt1	0.724336	-0.46527	0.953443	0.111316
Q9Z1L5	Q9Z1L5	Voltage-dependent calcium channel subunit alpha-2/delta-3;Voltage-dependent calcium channel subunit alpha-2-3;Voltage-dependent calcium channel subunit delta-3	Cacna2d3	0.744369	-0.425911	0.953121	0.111398
Q69Z26	Q69Z26	Contactin-4	Cntn4	0.738923	-0.436504	0.939151	0.11504
O70370	O70370	Cathepsin S	Ctss	1.89689	0.923635	0.936231	0.115816
Q8BGY3	Q8BGY3	Leucine zipper protein 2	Luzp2	0.542987	-0.881011	0.932175	0.116903
Q9Z2W8	Q9Z2W8	Glutamate receptor 4	Gria4	1.28453	0.361236	0.928223	0.117971
P09528	P09528	Ferritin heavy chain;Ferritin heavy chain, N-terminally processed	Fth1	0.775048	-0.367643	0.917805	0.120836
O08749	O08749	Dihydrolipoyl dehydrogenase, mitochondrial	Dld	1.23797	0.307976	0.913531	0.122031
P97298;CON__Q95121	P97298	Pigment epithelium-derived factor	Serpinf1	0.811377	-0.301555	0.90836	0.123492
P99029	P99029	Peroxiredoxin-5, mitochondrial	Prdx5	0.446147	-1.16441	0.90816	0.123549
Q61361	Q61361	Brevican core protein	Bcan	0.758216	-0.399319	0.898928	0.126204
Q8BWP8	Q8BWP8	Beta-1,4-glucuronyltransferase 1	B4gat1	0.742329	-0.429869	0.895116	0.127316
P01029;CON__P01030;CON__ENSEMBL:ENSBTAP00000007350	P01029	Complement C4-B;Complement C4 beta chain;Complement C4 alpha chain;C4a anaphylatoxin;Complement C4 gamma chain	C4b	0.916296	-0.126114	0.89359	0.127764
P47878	P47878	Insulin-like growth factor-binding protein 3	Igfbp3	0.644084	-0.634679	0.881797	0.131281
P21661	P21661	Neuroendocrine convertase 2	Pcsk2	0.703091	-0.508218	0.877729	0.132517
Q9D0M5;P63168	Q9D0M5;P63168	Dynein light chain 2, cytoplasmic;Dynein light chain 1, cytoplasmic	Dynll2;Dynll1	0.780157	-0.358164	0.877181	0.132684
P01837	P01837	Ig kappa chain C region		1.80512	0.852096	0.875039	0.13334
P06684;CON__Q1A7A4	P06684	Complement C5;Complement C5 beta chain;Complement C5 alpha chain;C5a anaphylatoxin;Complement C5 alpha chain	C5	1.96111	0.971672	0.873084	0.133942
P07309	P07309	Transthyretin	Ttr	1.56239	0.643757	0.872731	0.134051
Q9ES89	Q9ES89	Exostosin-like 2	Extl2	0.611998	-0.708401	0.857425	0.138859
P10126;P62631	P10126;P62631	Elongation factor 1-alpha 1;Elongation factor 1-alpha 2	Eef1a1;Eef1a2	0.392565	-1.34899	0.857152	0.138947
P13020;CON__Q3SX14	P13020	Gelsolin	Gsn	0.898013	-0.155192	0.854757	0.139715
Q9QUN9	Q9QUN9	Dickkopf-related protein 3	Dkk3	0.732327	-0.44944	0.843458	0.143398
E9Q7X6	E9Q7X6	Protein HEG homolog 1	Heg1	0.773926	-0.369733	0.841309	0.144109
Q6PHS9	Q6PHS9	Voltage-dependent calcium channel subunit alpha-2/delta-2;Voltage-dependent calcium channel subunit alpha-2-2;Voltage-dependent calcium channel subunit delta-2	Cacna2d2	0.792943	-0.334711	0.838593	0.145013
Q60590;Q63805	Q60590	Alpha-1-acid glycoprotein 1	Orm1	1.73401	0.79411	0.83398	0.146562
P33146	P33146	Cadherin-15	Cdh15	0.8271	-0.273867	0.815783	0.152833
Q9QUH0	Q9QUH0	Glutaredoxin-1	Glrx	0.707541	-0.499115	0.81392	0.15349
Q91VU0	Q91VU0	Protein FAM3C	Fam3c	0.773399	-0.370716	0.812842	0.153871
P07214	P07214	SPARC	Sparc	0.779159	-0.36001	0.808336	0.155476
Q62507	Q62507	Cochlin	Coch	0.758432	-0.398907	0.804682	0.15679
Q8BFR2;Q5STE3	Q8BFR2	Follistatin-related protein 5	Fstl5	2.48199	1.3115	0.804408	0.156889
P51885;CON__Q05443	P51885	Lumican	Lum	0.769811	-0.377424	0.802838	0.157457
Q9CR75	Q9CR75	Tumor necrosis factor receptor superfamily member 12A	Tnfrsf12a	0.677416	-0.561885	0.794634	0.16046
Q80Z24	Q80Z24	Neuronal growth regulator 1	Negr1	1.33212	0.413722	0.794015	0.160689
Q06890	Q06890	Clusterin;Clusterin beta chain;Clusterin alpha chain	Clu	0.849095	-0.236002	0.79295	0.161083
P31786	P31786	Acyl-CoA-binding protein	Dbi	0.699958	-0.514659	0.791135	0.161758
Q63912	Q63912	Oligodendrocyte-myelin glycoprotein	Omg	0.835712	-0.258922	0.790129	0.162133
O08912	O08912	Polypeptide N-acetylgalactosaminyltransferase 1;Polypeptide N-acetylgalactosaminyltransferase 1 soluble form	Galnt1	1.37265	0.456962	0.787278	0.163201
P08228	P08228	Superoxide dismutase [Cu-Zn]	Sod1	0.680414	-0.555515	0.786276	0.163578
P10649;P19639;Q80W21;P48774	P10649	Glutathione S-transferase Mu 1	Gstm1	0.569445	-0.812371	0.782507	0.165004
P02088;P02089;CON__Q3SX09;CON__P02070;P02104	P02088	Hemoglobin subunit beta-1	Hbb-b1	3.69294	1.88477	0.781287	0.165467
Q9R111	Q9R111	Guanine deaminase	Gda	1.33714	0.419154	0.774384	0.168119
Q6P1D5	Q6P1D5	Seizure 6-like protein	Sez6l	0.874217	-0.193937	0.771211	0.169352
O70624	O70624	Myocilin;Myocilin, N-terminal fragment;Myocilin, C-terminal fragment	Myoc	1.46089	0.546851	0.754283	0.176083
P21237	P21237	Brain-derived neurotrophic factor	Bdnf	0.659909	-0.59966	0.750406	0.177662
Q61468	Q61468	Mesothelin;Megakaryocyte-potentiating factor;Mesothelin, cleaved form	Msln	0.765841	-0.384884	0.749042	0.178221
Q02819	Q02819	Nucleobindin-1	Nucb1	0.806772	-0.309767	0.746687	0.17919
P52430	P52430	Serum paraoxonase/arylesterase 1	Pon1	2.02851	1.02042	0.733681	0.184637
Q62351	Q62351	Transferrin receptor protein 1	Tfrc	0.854351	-0.2271	0.733038	0.184911
Q99LS0	Q99LS0	Augurin	Ecrg4	0.71953	-0.474873	0.728712	0.186762
O54782	O54782	Epididymis-specific alpha-mannosidase	Man2b2	0.820119	-0.286096	0.728643	0.186791
Q61398	Q61398	Procollagen C-endopeptidase enhancer 1	Pcolce	0.736176	-0.441877	0.722585	0.189415
Q60675	Q60675	Laminin subunit alpha-2	Lama2	0.815	-0.295127	0.719777	0.190644
Q8HW98	Q8HW98	IgLON family member 5	Iglon5	0.745402	-0.42391	0.717029	0.191854
O35664	O35664	Interferon alpha/beta receptor 2	Ifnar2	0.763629	-0.389055	0.71561	0.192482
O89023	O89023	Tripeptidyl-peptidase 1	Tpp1	1.16715	0.222984	0.711705	0.194221
Q9EQH2	Q9EQH2	Endoplasmic reticulum aminopeptidase 1	Erap1	1.15318	0.205614	0.711095	0.194494
O88998	O88998	Noelin	Olfm1	0.83512	-0.259945	0.705347	0.197085
Q8VIB3	Q8VIB3	Type 2 lactosamine alpha-2,3-sialyltransferase	St3gal6	0.701696	-0.511082	0.703826	0.197776
Q03517	Q03517	Secretogranin-2;Secretoneurin;Manserin	Scg2	0.721227	-0.471474	0.700977	0.199078
Q8VCG4	Q8VCG4	Complement component C8 gamma chain	C8g	1.48511	0.570569	0.692104	0.203187
Q9CQI3;Q9ERL7	Q9CQI3	Glia maturation factor beta	Gmfb	0.792445	-0.335618	0.690289	0.204038
B1AXV0	B1AXV0	DOMON domain-containing protein FRRS1L	Frrs1l	0.720529	-0.472871	0.688914	0.204685
P55065	P55065	Phospholipid transfer protein	Pltp	0.796541	-0.328179	0.687197	0.205496
Q62179	Q62179	Semaphorin-4B	Sema4b	0.777191	-0.363659	0.686602	0.205777
P16045	P16045	Galectin-1	Lgals1	0.7189	-0.476137	0.676259	0.210737
P11672	P11672	Neutrophil gelatinase-associated lipocalin	Lcn2	4.95812	2.30979	0.673624	0.21202
P16014	P16014	Secretogranin-1;CCB peptide;PE-11	Chgb	0.777303	-0.363452	0.672949	0.212349
Q64322	Q64322	Neural proliferation differentiation and control protein 1	Npdc1	0.732829	-0.448451	0.671318	0.213149
P45376	P45376	Aldose reductase	Akr1b1	0.489074	-1.03188	0.669567	0.21401
P35700	P35700	Peroxiredoxin-1	Prdx1	0.730371	-0.453299	0.667205	0.215177
Q9JLC4	Q9JLC4	VPS10 domain-containing receptor SorCS1	Sorcs1	0.754138	-0.4071	0.666472	0.21554
P01027	P01027	Complement C3;Complement C3 beta chain;C3-beta-c;Complement C3 alpha chain;C3a anaphylatoxin;Acylation stimulating protein;Complement C3b alpha chain;Complement C3c alpha chain fragment 1;Complement C3dg fragment;Complement C3g fragment;Complement C3d fragment;Complement C3f fragment;Complement C3c alpha chain fragment 2	C3	1.42771	0.513705	0.663024	0.217258
Q61592;P39655	Q61592	Growth arrest-specific protein 6	Gas6	0.802239	-0.317897	0.657185	0.220199
P05532	P05532	Mast/stem cell growth factor receptor Kit	Kit	0.843505	-0.245532	0.656596	0.220498
Q00493	Q00493	Carboxypeptidase E	Cpe	0.826238	-0.27537	0.655073	0.221272
Q64726	Q64726	Zinc-alpha-2-glycoprotein	Azgp1	0.810769	-0.302638	0.652619	0.222526
Q61220	Q61220	Protein kinase C-binding protein NELL2	Nell2	0.828237	-0.271884	0.652049	0.222818
Q61772;Q8BYG9	Q61772	Ephrin type-A receptor 7	Epha7	0.779044	-0.360222	0.642933	0.227545
Q60841	Q60841	Reelin	Reln	0.772079	-0.37318	0.642325	0.227864
O09164	O09164	Extracellular superoxide dismutase [Cu-Zn]	Sod3	0.803859	-0.314986	0.641344	0.228379
Q99LX0	Q99LX0	Protein deglycase DJ-1	Park7	0.769346	-0.378295	0.641321	0.228391
P11087;CON__Q862S4	P11087	Collagen alpha-1(I) chain	Col1a1	0.762453	-0.391279	0.632327	0.23317
Q8BX43	Q8BX43	Tumor necrosis factor receptor superfamily member 19L	Relt	0.888148	-0.171128	0.631671	0.233523
Q7TMJ8	Q7TMJ8	Phosphoinositide-3-kinase-interacting protein 1	Pik3ip1	0.740141	-0.434128	0.627867	0.235577
Q61646;O55111	Q61646	Haptoglobin;Haptoglobin alpha chain;Haptoglobin beta chain	Hp	2.6712	1.41749	0.622322	0.238604
Q9WUC3	Q9WUC3	Lymphocyte antigen 6H	Ly6h	0.673239	-0.57081	0.616895	0.241604
Q8R464	Q8R464	Cell adhesion molecule 4	Cadm4	1.221	0.288061	0.611496	0.244627
P98086	P98086	Complement C1q subcomponent subunit A	C1qa	0.816956	-0.29167	0.607289	0.247008
Q61362	Q61362	Chitinase-3-like protein 1	Chi3l1	0.769312	-0.378359	0.606656	0.247368
Q7TSG5	Q7TSG5	SH3 domain-containing protein 21	Sh3d21	0.793692	-0.333349	0.606023	0.247729
P16092	P16092	Fibroblast growth factor receptor 1	Fgfr1	0.72126	-0.471408	0.605037	0.248292
P21460;Q8CCP0	P21460	Cystatin-C	Cst3	0.818722	-0.288554	0.603072	0.249418
Q04519	Q04519	Sphingomyelin phosphodiesterase	Smpd1	1.26536	0.339547	0.600551	0.25087
O88322	O88322	Nidogen-2	Nid2	0.828071	-0.272174	0.599122	0.251697
P37804	P37804	Transgelin	Tagln	0.411355	-1.28154	0.59788	0.252418
Q8BRK9	Q8BRK9	Alpha-mannosidase 2x	Man2a2	0.796646	-0.32799	0.59656	0.253186
P55288	P55288	Cadherin-11	Cdh11	0.7782	-0.361788	0.593914	0.254733
Q6PE13	Q6PE13	Proline-rich transmembrane protein 3	Prrt3	0.798582	-0.324488	0.592915	0.25532
Q9ER58	Q9ER58	Testican-2	Spock2	0.892333	-0.164346	0.591136	0.256368
Q8CG16;Q8CFG9;Q3UZ09	Q8CG16;Q8CFG9	Complement C1r-A subcomponent;Complement C1r-A subcomponent heavy chain;Complement C1r-A subcomponent light chain;Complement C1r-B subcomponent;Complement C1r-B subcomponent heavy chain;Complement C1r-B subcomponent light chain	C1ra;C1rb	0.88242	-0.180463	0.587138	0.258739
Q8BPB5	Q8BPB5	EGF-containing fibulin-like extracellular matrix protein 1	Efemp1	0.852302	-0.230564	0.582101	0.261758
Q9EPU5	Q9EPU5	Tumor necrosis factor receptor superfamily member 21	Tnfrsf21	0.923286	-0.115151	0.577192	0.264733
Q6S5C2	Q6S5C2	N-acetylglucosamine-1-phosphotransferase subunit gamma	Gnptg	1.33828	0.420382	0.576875	0.264926
P68372;Q9D6F9	P68372;Q9D6F9	Tubulin beta-4B chain;Tubulin beta-4A chain	Tubb4b;Tubb4a	0.525586	-0.928	0.576199	0.265339
Q8R2G4	Q8R2G4	Ecto-ADP-ribosyltransferase 3	Art3	1.17031	0.226887	0.572637	0.267524
Q8VCC9	Q8VCC9	Spondin-1	Spon1	0.89461	-0.16067	0.570544	0.268816
Q9R1V6	Q9R1V6	Disintegrin and metalloproteinase domain-containing protein 22	Adam22	1.30161	0.3803	0.567014	0.27101
O88393	O88393	Transforming growth factor beta receptor type 3	Tgfbr3	0.811077	-0.30209	0.563742	0.27306
Q8BGX3	Q8BGX3	Leucine-rich repeat and transmembrane domain-containing protein 2	Lrtm2	0.758457	-0.39886	0.561019	0.274778
Q921I1;CON__Q29443;CON__Q0IIK2	Q921I1	Serotransferrin	Tf	1.447	0.533064	0.560965	0.274811
Q80YX1	Q80YX1	Tenascin	Tnc	0.861114	-0.215724	0.558941	0.276095
P97785	P97785	GDNF family receptor alpha-1	Gfra1	0.688753	-0.537942	0.550399	0.281579
P70699	P70699	Lysosomal alpha-glucosidase	Gaa	0.852148	-0.230824	0.550111	0.281766
O89020	O89020	Afamin	Afm	1.36628	0.450257	0.548646	0.282719
Q9DAU7	Q9DAU7	WAP four-disulfide core domain protein 2	Wfdc2	0.819824	-0.286614	0.547351	0.283563
P18242	P18242	Cathepsin D	Ctsd	1.22045	0.287416	0.54118	0.28762
P21956	P21956	Lactadherin	Mfge8	0.78601	-0.347381	0.538072	0.289686
P97467	P97467	Peptidyl-glycine alpha-amidating monooxygenase;Peptidylglycine alpha-hydroxylating monooxygenase;Peptidyl-alpha-hydroxyglycine alpha-amidating lyase	Pam	0.811727	-0.300934	0.536098	0.291006
Q8CGM1	Q8CGM1	Brain-specific angiogenesis inhibitor 2	Bai2	0.851361	-0.232157	0.532778	0.293239
Q8BH61	Q8BH61	Coagulation factor XIII A chain	F13a1	1.27228	0.347415	0.531859	0.293861
P24549;O35945;P47738	P24549	Retinal dehydrogenase 1	Aldh1a1	0.490144	-1.02872	0.530797	0.29458
P01887	P01887	Beta-2-microglobulin	B2m	0.847698	-0.238378	0.528563	0.296099
Q03157	Q03157	Amyloid-like protein 1;C30	Aplp1	0.872216	-0.197243	0.525342	0.298303
P07310	P07310	Creatine kinase M-type	Ckm	2.71254	1.43965	0.524494	0.298886
P05064;Q91Y97	P05064	Fructose-bisphosphate aldolase A	Aldoa	1.23065	0.299421	0.518709	0.302894
P03995	P03995	Glial fibrillary acidic protein	Gfap	3.13517	1.64854	0.517727	0.30358
Q8BSU2	Q8BSU2	C-X-C motif chemokine 16	Cxcl16	0.676802	-0.563195	0.516965	0.304113
P11627	P11627	Neural cell adhesion molecule L1	L1cam	0.818185	-0.2895	0.51639	0.304516
P63101	P63101	14-3-3 protein zeta/delta	Ywhaz	0.750319	-0.414424	0.51059	0.30861
P01942	P01942	Hemoglobin subunit alpha	Hba	2.47471	1.30726	0.509644	0.309283
O88342	O88342	WD repeat-containing protein 1	Wdr1	1.19689	0.259289	0.508303	0.310239
Q4V9Z5;Q7TSH4;Q1EG27	Q4V9Z5	Seizure 6-like protein 2	Sez6l2	0.919066	-0.12176	0.50767	0.310692
Q9R098;CON__ENSEMBL:ENSBTAP00000023055	Q9R098	Hepatocyte growth factor activator;Hepatocyte growth factor activator short chain;Hepatocyte growth factor activator long chain	Hgfac	1.45204	0.538079	0.50442	0.313026
Q8BHN3	Q8BHN3	Neutral alpha-glucosidase AB	Ganab	0.911952	-0.13297	0.5014	0.31521
Q8BK62	Q8BK62	Olfactomedin-like protein 3	Olfml3	0.690523	-0.534239	0.500065	0.31618
P13595	P13595	Neural cell adhesion molecule 1	Ncam1	0.836903	-0.256868	0.494687	0.32012
Q810U3	Q810U3	Neurofascin	Nfasc	0.845386	-0.242318	0.492366	0.321835
Q6PB93	Q6PB93	Polypeptide N-acetylgalactosaminyltransferase 2;Polypeptide N-acetylgalactosaminyltransferase 2 soluble form	Galnt2	1.23365	0.302938	0.491465	0.322504
P97765	P97765	WW domain-binding protein 2	Wbp2	0.87208	-0.197467	0.491379	0.322568
P39038	P39038	Cadherin-4	Cdh4	0.846444	-0.240513	0.490221	0.323429
Q9JMB8	Q9JMB8	Contactin-6	Cntn6	0.840443	-0.250778	0.48458	0.327657
P11276	P11276	Fibronectin;Anastellin	Fn1	0.836396	-0.257743	0.484194	0.327948
P22599	P22599	Alpha-1-antitrypsin 1-2	Serpina1b	1.53398	0.617277	0.482724	0.329061
Q64105	Q64105	Sepiapterin reductase	Spr	0.801102	-0.319942	0.480216	0.330966
O89051	O89051	Integral membrane protein 2B;BRI2, membrane form;BRI2 intracellular domain;BRI2C, soluble form;Bri23 peptide	Itm2b	0.775737	-0.36636	0.478314	0.332419
P26262	P26262	Plasma kallikrein;Plasma kallikrein heavy chain;Plasma kallikrein light chain	Klkb1	1.44803	0.53409	0.475219	0.334796
P17182	P17182	Alpha-enolase	Eno1	0.744531	-0.425596	0.475061	0.334918
Q62148;Q9JHW9;Q9CZS1	Q62148	Retinal dehydrogenase 2	Aldh1a2	0.493203	-1.01975	0.470436	0.338504
O09010	O09010	Beta-1,3-N-acetylglucosaminyltransferase lunatic fringe	Lfng	0.834439	-0.261122	0.468323	0.340155
Q91XV3	Q91XV3	Brain acid soluble protein 1	Basp1	0.814317	-0.296338	0.464389	0.34325
Q7TQN3	Q7TQN3	WAP, Kazal, immunoglobulin, Kunitz and NTR domain-containing protein 2	Wfikkn2	1.28343	0.360001	0.463912	0.343628
Q71M36	Q71M36	Chondroitin sulfate proteoglycan 5	Cspg5	0.904086	-0.145468	0.462814	0.344498
P06797	P06797	Cathepsin L1;Cathepsin L1 heavy chain;Cathepsin L1 light chain	Ctsl	1.1604	0.214627	0.461377	0.345639
Q64387	Q64387	Prepronociceptin;Neuropeptide 1;Nociceptin;Neuropeptide 2	Pnoc	0.819112	-0.287867	0.460426	0.346397
P63239	P63239	Neuroendocrine convertase 1	Pcsk1	0.845703	-0.241776	0.455869	0.350051
P06909	P06909	Complement factor H	Cfh	1.12859	0.174516	0.453705	0.351799
P10923	P10923	Osteopontin	Spp1	1.21794	0.284446	0.452825	0.352513
Q8VEB4	Q8VEB4	Group XV phospholipase A2	Pla2g15	1.19152	0.252801	0.452683	0.352628
P57774	P57774	Pro-neuropeptide Y;Neuropeptide Y;C-flanking peptide of NPY	Npy	1.32769	0.40892	0.452465	0.352805
Q9QZF2	Q9QZF2	Glypican-1;Secreted glypican-1	Gpc1	0.858958	-0.21934	0.451513	0.35358
O08997	O08997	Copper transport protein ATOX1	Atox1	0.789826	-0.340394	0.441286	0.362005
Q60847	Q60847	Collagen alpha-1(XII) chain	Col12a1	1.12644	0.17177	0.436244	0.366232
Q8CAL5	Q8CAL5	Glypican-5;Secreted glypican-5	Gpc5	0.818438	-0.289055	0.432873	0.369085
Q8BLC3	Q8BLC3	Ly6/PLAUR domain-containing protein 1	Lypd1	0.853298	-0.228878	0.4272	0.373939
Q6DIB5	Q6DIB5	Multiple epidermal growth factor-like domains protein 10	Megf10	0.858206	-0.220605	0.42679	0.374292
Q6P9K9	Q6P9K9	Neurexin-3	Nrxn3	0.869748	-0.201331	0.425983	0.374988
P12023	P12023	Amyloid beta A4 protein;N-APP;Soluble APP-alpha;Soluble APP-beta;C99;Beta-amyloid protein 42;Beta-amyloid protein 40;C83;P3(42);P3(40);C80;Gamma-secretase C-terminal fragment 59;Gamma-secretase C-terminal fragment 57;Gamma-secretase C-terminal fragment 50;C31	App	0.895552	-0.159151	0.421775	0.378638
P99024	P99024	Tubulin beta-5 chain	Tubb5	0.63504	-0.65508	0.41889	0.381163
P28665;B2KFW1	P28665	Murinoglobulin-1	Mug1	1.43928	0.52535	0.41792	0.382015
P07901	P07901	Heat shock protein HSP 90-alpha	Hsp90aa1	0.790515	-0.339135	0.416979	0.382843
Q9CS84;P0DI97	Q9CS84	Neurexin-1	Nrxn1	0.837373	-0.256058	0.416409	0.383346
P16301	P16301	Phosphatidylcholine-sterol acyltransferase	Lcat	0.893541	-0.162395	0.413272	0.386125
Q8R555	Q8R555	Cartilage acidic protein 1	Crtac1	0.868839	-0.202839	0.411936	0.387315
Q8R4G6	Q8R4G6	Alpha-1,6-mannosylglycoprotein 6-beta-N-acetylglucosaminyltransferase A	Mgat5	1.14039	0.189526	0.408908	0.390025
O70250	O70250	Phosphoglycerate mutase 2	Pgam2	2.42754	1.2795	0.408324	0.39055
O70258	O70258	Epsilon-sarcoglycan	Sgce	0.778969	-0.360362	0.407012	0.391731
Q99P47	Q99P47	Contactin-associated protein-like 4	Cntnap4	0.853269	-0.228928	0.405555	0.393047
Q6IEE6	Q6IEE6	Transmembrane protein 132E	Tmem132e	0.868903	-0.202732	0.40193	0.396341
Q9D0F9	Q9D0F9	Phosphoglucomutase-1	Pgm1	0.852772	-0.229768	0.401504	0.396731
Q6P5F6	Q6P5F6	Zinc transporter ZIP10	Slc39a10	1.30799	0.387347	0.401217	0.396993
P68254	P68254	14-3-3 protein theta	Ywhaq	0.646242	-0.629853	0.398239	0.399725
O35136	O35136	Neural cell adhesion molecule 2	Ncam2	0.823582	-0.280015	0.393313	0.404284
B9EKR1	B9EKR1	Receptor-type tyrosine-protein phosphatase zeta	Ptprz1	0.818123	-0.28961	0.391698	0.40579
P29268	P29268	Connective tissue growth factor	Ctgf	0.841255	-0.249384	0.390197	0.407195
O08709	O08709	Peroxiredoxin-6	Prdx6	0.784439	-0.350267	0.386374	0.410796
P70232	P70232	Neural cell adhesion molecule L1-like protein;Processed neural cell adhesion molecule L1-like protein	Chl1	0.829462	-0.269752	0.380303	0.416578
P98063	P98063	Bone morphogenetic protein 1	Bmp1	0.787947	-0.34383	0.378908	0.417918
P07361	P07361	Alpha-1-acid glycoprotein 2	Orm2	2.18942	1.13055	0.378559	0.418255
A2A8L5	A2A8L5	Receptor-type tyrosine-protein phosphatase F	Ptprf	1.1386	0.18726	0.378369	0.418437
O88844;P54071	O88844	Isocitrate dehydrogenase [NADP] cytoplasmic	Idh1	0.829056	-0.270459	0.378337	0.418468
Q61838	Q61838	Alpha-2-macroglobulin;Alpha-2-macroglobulin 165 kDa subunit;Alpha-2-macroglobulin 35 kDa subunit	A2m	1.50239	0.587258	0.377557	0.41922
Q8C1Q4	Q8C1Q4	Meteorin	Metrn	0.895643	-0.159005	0.376573	0.420172
P43025	P43025	Tetranectin	Clec3b	1.1845	0.244276	0.375358	0.421349
O88968	O88968	Transcobalamin-2	Tcn2	0.878956	-0.186138	0.372999	0.423644
Q08879;CON__ENSEMBL:ENSBTAP00000016046	Q08879	Fibulin-1	Fbln1	0.897385	-0.156201	0.369842	0.426735
Q9QXV0	Q9QXV0	ProSAAS;KEP;Big SAAS;Little SAAS;Big PEN-LEN;PEN;PEN-20;PEN-19;Little LEN;Big LEN	Pcsk1n	0.841501	-0.248963	0.369621	0.426952
Q9WUU7	Q9WUU7	Cathepsin Z	Ctsz	0.898362	-0.154631	0.369131	0.427434
Q60673	Q60673	Receptor-type tyrosine-protein phosphatase-like N	Ptprn	0.839724	-0.252014	0.366074	0.430453
Q810C1	Q810C1	SLIT and NTRK-like protein 1	Slitrk1	0.873548	-0.195041	0.365583	0.43094
Q91X72	Q91X72	Hemopexin	Hpx	1.28854	0.365734	0.365503	0.43102
Q8R5M8	Q8R5M8	Cell adhesion molecule 1	Cadm1	0.817244	-0.29116	0.363858	0.432656
Q91XQ5	Q91XQ5	Carbohydrate sulfotransferase 15	Chst15	0.912341	-0.132355	0.360447	0.436067
Q9EPL2	Q9EPL2	Calsyntenin-1;Soluble Alc-alpha;CTF1-alpha	Clstn1	0.88331	-0.179008	0.358565	0.437961
Q8K182	Q8K182	Complement component C8 alpha chain	C8a	1.21106	0.276265	0.358431	0.438095
Q922P8	Q922P8	Transmembrane protein 132A	Tmem132a	0.861705	-0.214734	0.35706	0.439481
P12399;P12400	P12399	Protein CTLA-2-alpha	Ctla2a	1.25053	0.322536	0.355193	0.441374
P08113	P08113	Endoplasmin	Hsp90b1	0.906079	-0.142292	0.353805	0.442787
Q64299	Q64299	Protein NOV homolog	Nov	0.852002	-0.231071	0.352623	0.443994
Q9QY42	Q9QY42	Prosaposin receptor GPR37	Gpr37	0.8252	-0.277185	0.35157	0.445072
Q922Q6	Q922Q6	Alpha/beta hydrolase domain-containing protein 14A	Abhd14a	1.18287	0.242291	0.342814	0.454136
Q8BQB4	Q8BQB4	Four-jointed box protein 1	Fjx1	0.856701	-0.223136	0.335279	0.462084
Q9R171	Q9R171	Cerebellin-1;Cerebellin;[des-Ser1]-cerebellin	Cbln1	0.855112	-0.225815	0.334359	0.463064
Q61839	Q61839	C-type natriuretic peptide;CNP-22;CNP-29;CNP-53	Nppc	0.84205	-0.248022	0.331752	0.465852
Q9CPW0	Q9CPW0	Contactin-associated protein-like 2	Cntnap2	0.92086	-0.118946	0.331127	0.466523
Q61730	Q61730	Interleukin-1 receptor accessory protein	Il1rap	1.20093	0.264154	0.327462	0.470476
P29699;CON__P12763	P29699	Alpha-2-HS-glycoprotein	Ahsg	1.15312	0.205538	0.323923	0.474326
P27773	P27773	Protein disulfide-isomerase A3	Pdia3	1.08141	0.112916	0.321518	0.47696
Q9DBJ1	Q9DBJ1	Phosphoglycerate mutase 1	Pgam1	0.8235	-0.28016	0.321443	0.477043
Q80XD8	Q80XD8	Proline-rich acidic protein 1	Prap1	0.832235	-0.264937	0.317983	0.480859
Q61171	Q61171	Peroxiredoxin-2	Prdx2	1.14622	0.196883	0.312603	0.486852
Q810U4	Q810U4	Neuronal cell adhesion molecule	Nrcam	0.810468	-0.303172	0.312188	0.487318
Q9R1E6	Q9R1E6	Ectonucleotide pyrophosphatase/phosphodiesterase family member 2	Enpp2	0.859274	-0.21881	0.312172	0.487335
Q7M6Z0	Q7M6Z0	Reticulon-4 receptor-like 2	Rtn4rl2	0.849569	-0.235197	0.310694	0.488996
P07759	P07759	Serine protease inhibitor A3K	Serpina3k	1.15384	0.206447	0.306156	0.494133
P21836	P21836	Acetylcholinesterase	Ache	0.894128	-0.161447	0.305924	0.494397
Q61247	Q61247	Alpha-2-antiplasmin	Serpinf2	1.19503	0.257043	0.305894	0.494431
Q11011	Q11011	Puromycin-sensitive aminopeptidase	Npepps	0.815362	-0.294488	0.304271	0.496283
Q80V26	Q80V26	Inositol monophosphatase 3	Impad1	0.886199	-0.174297	0.303861	0.496752
Q07456	Q07456	Protein AMBP;Alpha-1-microglobulin;Inter-alpha-trypsin inhibitor light chain;Trypstatin	Ambp	1.22228	0.28958	0.303741	0.496888
O88531	O88531	Palmitoyl-protein thioesterase 1	Ppt1	1.1137	0.155358	0.301912	0.498986
P63017;P17156	P63017	Heat shock cognate 71 kDa protein	Hspa8	0.868831	-0.202852	0.30108	0.499942
P51910	P51910	Apolipoprotein D	Apod	0.814023	-0.296859	0.300762	0.500309
P48036	P48036	Annexin A5	Anxa5	0.820854	-0.284802	0.299286	0.502012
Q9DBG3;O35643	Q9DBG3	AP-2 complex subunit beta	Ap2b1	0.875947	-0.191085	0.295239	0.506711
P97857	P97857	A disintegrin and metalloproteinase with thrombospondin motifs 1	Adamts1	1.3382	0.420298	0.293849	0.508337
Q8BFR4	Q8BFR4	N-acetylglucosamine-6-sulfatase	Gns	1.14292	0.192721	0.293281	0.509001
Q9DD06	Q9DD06	Retinoic acid receptor responder protein 2	Rarres2	0.880299	-0.183935	0.291388	0.511225
P15116	P15116	Cadherin-2	Cdh2	0.899562	-0.152705	0.290889	0.511813
A2ASQ1	A2ASQ1	Agrin;Agrin N-terminal 110 kDa subunit;Agrin C-terminal 110 kDa subunit;Agrin C-terminal 90 kDa fragment;Agrin C-terminal 22 kDa fragment	Agrn	0.908931	-0.137758	0.289974	0.512892
Q62361	Q62361	Pro-thyrotropin-releasing hormone;Thyrotropin-releasing hormone	Trh	1.08091	0.112248	0.288557	0.514569
Q61703;CON__Q9TRI1	Q61703	Inter-alpha-trypsin inhibitor heavy chain H2	Itih2	1.14808	0.199218	0.287889	0.51536
P07724;P70434	P07724	Serum albumin	Alb	0.881036	-0.182728	0.282851	0.521374
Q09200	Q09200	Beta-1,4 N-acetylgalactosaminyltransferase 1	B4galnt1	0.879762	-0.184815	0.282362	0.521961
P97300	P97300	Neuroplastin	Nptn	0.76085	-0.394315	0.280582	0.524104
Q99LJ1	Q99LJ1	Tissue alpha-L-fucosidase	Fuca1	1.11636	0.1588	0.280261	0.524492
O35516	O35516	Neurogenic locus notch homolog protein 2;Notch 2 extracellular truncation;Notch 2 intracellular domain	Notch2	1.09805	0.134947	0.279754	0.525104
Q99J85	Q99J85	Neuronal pentraxin receptor	Nptxr	0.818194	-0.289486	0.279354	0.525589
P06330;P01757;P01756	P06330	Ig heavy chain V region AC38 205.12		1.39958	0.484992	0.279316	0.525634
Q6PCX7	Q6PCX7	Repulsive guidance molecule A	Rgma	0.887643	-0.171948	0.277754	0.527529
Q9D1T0;Q3URE9	Q9D1T0	Leucine-rich repeat and immunoglobulin-like domain-containing nogo receptor-interacting protein 1	Lingo1	0.855636	-0.224931	0.275551	0.530211
Q8CG14;Q8CFG8	Q8CG14	Complement C1s-A subcomponent;Complement C1s-A subcomponent heavy chain;Complement C1s-A subcomponent light chain	C1sa	0.86312	-0.212367	0.274772	0.531164
Q8BVI4	Q8BVI4	Dihydropteridine reductase	Qdpr	0.876073	-0.190877	0.274133	0.531946
Q61508	Q61508	Extracellular matrix protein 1	Ecm1	0.880335	-0.183876	0.274129	0.53195
Q8BND5	Q8BND5	Sulfhydryl oxidase 1	Qsox1	0.924808	-0.112774	0.273117	0.533192
Q8VCS0;CON__ENSEMBL:ENSBTAP00000016285	Q8VCS0	N-acetylmuramoyl-L-alanine amidase	Pglyrp2	1.20549	0.269618	0.27289	0.533471
Q8C9W3	Q8C9W3	A disintegrin and metalloproteinase with thrombospondin motifs 2	Adamts2	0.875475	-0.191861	0.271052	0.535733
Q61129	Q61129	Complement factor I;Complement factor I heavy chain;Complement factor I light chain	Cfi	1.16486	0.220152	0.269409	0.537763
P16858;Q64467	P16858	Glyceraldehyde-3-phosphate dehydrogenase	Gapdh	0.798189	-0.325197	0.265696	0.542381
O89001	O89001	Carboxypeptidase D	Cpd	0.921308	-0.118245	0.26495	0.543313
Q923D2	Q923D2	Flavin reductase (NADPH)	Blvrb	1.35712	0.440545	0.263271	0.545418
O89017	O89017	Legumain	Lgmn	0.911474	-0.133727	0.261863	0.547188
O70340	O70340	Neuronal pentraxin-2	Nptx2	1.11535	0.157497	0.261686	0.547412
Q06335	Q06335	Amyloid-like protein 2	Aplp2	0.953383	-0.0688723	0.260656	0.548712
O88307	O88307	Sortilin-related receptor	Sorl1	0.861558	-0.21498	0.259656	0.549976
P20065	P20065	Thymosin beta-4;Hematopoietic system regulatory peptide	Tmsb4x	0.897205	-0.15649	0.258628	0.55128
P12804	P12804	Fibroleukin	Fgl2	0.916524	-0.125756	0.258443	0.551515
Q3UR78	Q3UR78	Neuropeptide-like protein C4orf48 homolog	Gm1673	0.836848	-0.256962	0.256597	0.553864
P06151	P06151	L-lactate dehydrogenase A chain	Ldha	0.851059	-0.232669	0.256378	0.554143
Q9DCD0	Q9DCD0	6-phosphogluconate dehydrogenase, decarboxylating	Pgd	0.823287	-0.280532	0.255379	0.555419
Q99JA0;P70160	Q99JA0;P70160	Calcitonin gene-related peptide 1;Calcitonin	Calca	0.864956	-0.209301	0.255325	0.555488
P29788	P29788	Vitronectin	Vtn	0.923643	-0.114593	0.254097	0.557062
Q80W93	Q80W93	Hydrocephalus-inducing protein	Hydin	0.897806	-0.155525	0.253639	0.55765
P10605	P10605	Cathepsin B;Cathepsin B light chain;Cathepsin B heavy chain	Ctsb	0.936909	-0.094019	0.252194	0.559508
Q03137	Q03137	Ephrin type-A receptor 4	Epha4	0.89141	-0.165839	0.24956	0.562911
P09411;P09041	P09411	Phosphoglycerate kinase 1	Pgk1	0.823366	-0.280394	0.244406	0.569631
P70389	P70389	Insulin-like growth factor-binding protein complex acid labile subunit	Igfals	1.24489	0.316022	0.243383	0.570974
Q9WTR5	Q9WTR5	Cadherin-13	Cdh13	0.897153	-0.156575	0.243126	0.571312
P04247	P04247	Myoglobin	Mb	1.7601	0.815657	0.242945	0.571551
P32848	P32848	Parvalbumin alpha	Pvalb	0.803544	-0.31555	0.240977	0.574147
O35417	O35417	Proenkephalin-B;Alpha-neoendorphin;Beta-neoendorphin;Big dynorphin;Dynorphin A(1-17);Dynorphin A(1-13);Dynorphin A(1-8);Leu-enkephalin;Rimorphin;Leumorphin	Pdyn	0.734425	-0.445312	0.240395	0.574916
P04186;CON__Q3KUS7	P04186	Complement factor B;Complement factor B Ba fragment;Complement factor B Bb fragment	Cfb	1.14263	0.192354	0.240267	0.575086
Q9ESB3	Q9ESB3	Histidine-rich glycoprotein	Hrg	1.3119	0.391656	0.239531	0.576062
P32261;CON__P41361	P32261	Antithrombin-III	Serpinc1	1.17215	0.22916	0.238902	0.576897
Q06770	Q06770	Corticosteroid-binding globulin	Serpina6	1.11296	0.1544	0.238771	0.577071
Q99JH7	Q99JH7	Calsyntenin-3	Clstn3	0.910414	-0.135406	0.23777	0.578402
P98156	P98156	Very low-density lipoprotein receptor	Vldlr	1.06213	0.0869617	0.236061	0.580683
P70274	P70274	Selenoprotein P	Sepp1	1.13606	0.184043	0.233309	0.584375
P11499	P11499	Heat shock protein HSP 90-beta	Hsp90ab1	0.822232	-0.282383	0.232761	0.585112
Q60963	Q60963	Platelet-activating factor acetylhydrolase	Pla2g7	0.875912	-0.191143	0.232707	0.585185
Q9R0S3	Q9R0S3	Matrix metalloproteinase-17	Mmp17	1.06369	0.089081	0.228947	0.590274
P52480;P53657	P52480	Pyruvate kinase PKM	Pkm	1.04556	0.0642717	0.228822	0.590443
Q8BH35	Q8BH35	Complement component C8 beta chain	C8b	1.16116	0.215563	0.227618	0.592082
P01872	P01872	Ig mu chain C region	Ighm	1.32318	0.404005	0.226464	0.593658
P61982	P61982	14-3-3 protein gamma;14-3-3 protein gamma, N-terminally processed	Ywhag	0.867548	-0.204984	0.225688	0.594719
P29533	P29533	Vascular cell adhesion protein 1	Vcam1	0.960041	-0.0588323	0.225309	0.595239
Q9R1Q9	Q9R1Q9	V-type proton ATPase subunit S1	Atp6ap1	0.919256	-0.121462	0.225139	0.595472
P97333	P97333	Neuropilin-1	Nrp1	0.911743	-0.133302	0.224767	0.595982
Q99PJ0	Q99PJ0	Neurotrimin	Ntm	1.1516	0.203641	0.224317	0.5966
P28654;REV__Q91VC4	P28654	Decorin	Dcn	0.966341	-0.0493957	0.223673	0.597485
Q8CFV4	Q8CFV4	Neuritin	Nrn1	0.912825	-0.131589	0.22182	0.60004
P70296	P70296	Phosphatidylethanolamine-binding protein 1;Hippocampal cholinergic neurostimulating peptide	Pebp1	1.08034	0.111488	0.221584	0.600366
P47879	P47879	Insulin-like growth factor-binding protein 4	Igfbp4	0.91476	-0.128535	0.219469	0.603296
Q9JHH6	Q9JHH6	Carboxypeptidase B2	Cpb2	1.14694	0.197791	0.219181	0.603697
P19137	P19137	Laminin subunit alpha-1	Lama1	0.885281	-0.175793	0.218736	0.604316
Q01279	Q01279	Epidermal growth factor receptor	Egfr	1.15489	0.207752	0.217788	0.605636
P17183	P17183	Gamma-enolase	Eno2	0.919383	-0.121261	0.216	0.608135
Q8BLK3	Q8BLK3	Limbic system-associated membrane protein	Lsamp	0.900883	-0.150589	0.215979	0.608165
P11438	P11438	Lysosome-associated membrane glycoprotein 1	Lamp1	0.872337	-0.197043	0.215838	0.608361
Q921V5	Q921V5	Alpha-1,6-mannosyl-glycoprotein 2-beta-N-acetylglucosaminyltransferase	Mgat2	0.845511	-0.242104	0.215712	0.608538
Q00623;CON__P15497	Q00623	Apolipoprotein A-I;Proapolipoprotein A-I;Truncated apolipoprotein A-I	Apoa1	1.26129	0.334898	0.21514	0.60934
Q8VHY0	Q8VHY0	Chondroitin sulfate proteoglycan 4	Cspg4	0.937469	-0.0931567	0.209222	0.617701
Q64442	Q64442	Sorbitol dehydrogenase	Sord	0.913128	-0.131112	0.207984	0.619464
Q91VI7	Q91VI7	Ribonuclease inhibitor	Rnh1	0.798931	-0.323858	0.2069	0.621011
Q99PT1	Q99PT1	Rho GDP-dissociation inhibitor 1	Arhgdia	0.872557	-0.196678	0.205147	0.623524
Q01768;P15532	Q01768;P15532	Nucleoside diphosphate kinase B;Nucleoside diphosphate kinase A	Nme2;Nme1	0.898815	-0.153904	0.202993	0.626624
Q8CHP8	Q8CHP8	Phosphoglycolate phosphatase	Pgp	1.14044	0.189587	0.199716	0.63137
P17751	P17751	Triosephosphate isomerase	Tpi1	0.86192	-0.214374	0.198991	0.632424
P23506	P23506	Protein-L-isoaspartate(D-aspartate) O-methyltransferase	Pcmt1	0.945798	-0.0803967	0.198016	0.633846
P11680	P11680	Properdin	Cfp	1.08866	0.12255	0.197831	0.634116
Q8R1U2	Q8R1U2	Cell growth regulator with EF hand domain protein 1	Cgref1	0.901368	-0.149811	0.196062	0.636705
Q3U1J4	Q3U1J4	DNA damage-binding protein 1	Ddb1	1.06921	0.096549	0.192538	0.641892
P50396	P50396	Rab GDP dissociation inhibitor alpha	Gdi1	0.922039	-0.117101	0.191705	0.643125
Q80ZF8	Q80ZF8	Brain-specific angiogenesis inhibitor 3	Bai3	1.0819	0.113571	0.187152	0.649902
O35988	O35988	Syndecan-4	Sdc4	0.884657	-0.17681	0.186501	0.650878
O35464	O35464	Semaphorin-6A	Sema6a	0.88369	-0.178387	0.184596	0.653739
Q9QXC1	Q9QXC1	Fetuin-B	Fetub	1.08314	0.11522	0.184395	0.654041
Q7TSK3	Q7TSK3	Protocadherin-8	Pcdh8	0.930953	-0.103219	0.183797	0.654942
Q6PDJ1	Q6PDJ1	VWFA and cache domain-containing protein 1	Cachd1	1.09031	0.124742	0.182462	0.656959
P15626	P15626	Glutathione S-transferase Mu 2	Gstm2	0.812531	-0.299505	0.182362	0.65711
Q8R4G0	Q8R4G0	Netrin-G1	Ntng1	0.920905	-0.118876	0.18015	0.660465
Q91V41	Q91V41	Ras-related protein Rab-14	Rab14	0.935398	-0.0963483	0.178804	0.662515
Q9D7I0	Q9D7I0	Protein shisa-5	Shisa5	0.866017	-0.207533	0.178111	0.663573
Q61702;CON__Q0VCM5	Q61702	Inter-alpha-trypsin inhibitor heavy chain H1	Itih1	1.16513	0.220497	0.175486	0.667596
Q6PHU5	Q6PHU5	Sortilin	Sort1	0.911374	-0.133885	0.171029	0.674483
Q9Z0J0	Q9Z0J0	Epididymal secretory protein E1	Npc2	1.07164	0.0998175	0.170353	0.675533
Q9ESY9	Q9ESY9	Gamma-interferon-inducible lysosomal thiol reductase	Ifi30	0.964577	-0.052032	0.168862	0.677857
Q5F226	Q5F226	Protocadherin Fat 2	Fat2	0.951802	-0.0712667	0.168326	0.678694
P33622	P33622	Apolipoprotein C-III	Apoc3	1.20258	0.266127	0.168129	0.679002
Q9R0P3	Q9R0P3	S-formylglutathione hydrolase	Esd	1.15057	0.202352	0.167827	0.679474
Q8QZR4	Q8QZR4	Out at first protein homolog	Oaf	0.926153	-0.110678	0.167763	0.679574
Q9JHJ8	Q9JHJ8	ICOS ligand	Icoslg	1.06447	0.090142	0.167057	0.68068
B0V2N1	B0V2N1	Receptor-type tyrosine-protein phosphatase S	Ptprs	0.952263	-0.0705687	0.16318	0.686783
P05063	P05063	Fructose-bisphosphate aldolase C	Aldoc	0.862411	-0.213553	0.161608	0.689275
Q8BTG7	Q8BTG7	Protein NDRG4	Ndrg4	1.06533	0.091296	0.160424	0.691155
P01831	P01831	Thy-1 membrane glycoprotein	Thy1	1.08498	0.117665	0.158207	0.694693
P97798	P97798	Neogenin	Neo1	1.07816	0.108573	0.158066	0.694918
Q5FW85	Q5FW85	Extracellular matrix protein 2	Ecm2	0.91223	-0.13253	0.15397	0.701503
O08644	O08644	Ephrin type-B receptor 6	Ephb6	1.06821	0.0952	0.152279	0.70424
P20918;CON__P06868	P20918	Plasminogen;Plasmin heavy chain A;Activation peptide;Angiostatin;Plasmin heavy chain A, short form;Plasmin light chain B	Plg	1.08977	0.124025	0.151525	0.705465
P63028	P63028	Translationally-controlled tumor protein	Tpt1	0.905326	-0.14349	0.150746	0.706731
P03953	P03953	Complement factor D	Cfd	1.1272	0.172741	0.149377	0.708962
P17742	P17742	Peptidyl-prolyl cis-trans isomerase A;Peptidyl-prolyl cis-trans isomerase A, N-terminally processed	Ppia	0.910598	-0.135114	0.147574	0.711912
Q9CQI6	Q9CQI6	Coactosin-like protein	Cotl1	0.942268	-0.085791	0.144849	0.716393
Q61704;CON__Q0V8M9	Q61704	Inter-alpha-trypsin inhibitor heavy chain H3	Itih3	1.08637	0.119518	0.13791	0.727931
Q9QYB1	Q9QYB1	Chloride intracellular channel protein 4	Clic4	0.895917	-0.158563	0.137779	0.728151
Q9CYN9	Q9CYN9	Renin receptor	Atp6ap2	1.05572	0.078232	0.137501	0.728616
Q9DBD0	Q9DBD0	Inhibitor of carbonic anhydrase	Ica	1.08786	0.12149	0.137256	0.729027
Q8R366	Q8R366	Immunoglobulin superfamily member 8	Igsf8	1.09547	0.131552	0.133858	0.734754
O70362	O70362	Phosphatidylinositol-glycan-specific phospholipase D	Gpld1	1.03247	0.0460963	0.132988	0.736227
P20033	P20033	Platelet-derived growth factor subunit A	Pdgfa	0.900422	-0.151326	0.131684	0.738441
Q04447	Q04447	Creatine kinase B-type	Ckb	1.15458	0.207362	0.128364	0.744108
O88745	O88745	Scrapie-responsive protein 1	Scrg1	1.1263	0.171597	0.127806	0.745066
P04925	P04925	Major prion protein	Prnp	0.923728	-0.114459	0.127133	0.746219
Q62443	Q62443	Neuronal pentraxin-1	Nptx1	0.954337	-0.06743	0.126477	0.747348
Q64449	Q64449	C-type mannose receptor 2	Mrc2	0.943062	-0.084575	0.125159	0.749619
P12960	P12960	Contactin-1	Cntn1	0.933041	-0.0999883	0.124856	0.750143
Q9DBH5	Q9DBH5	Vesicular integral-membrane protein VIP36	Lman2	1.054	0.0758742	0.124087	0.751473
P09103	P09103	Protein disulfide-isomerase	P4hb	1.02946	0.0418942	0.121404	0.756128
P26883	P26883	Peptidyl-prolyl cis-trans isomerase FKBP1A	Fkbp1a	0.912145	-0.132665	0.120368	0.757935
P55284	P55284	Cadherin-5	Cdh5	0.976549	-0.0342363	0.119154	0.760056
Q3UHD1	Q3UHD1	Brain-specific angiogenesis inhibitor 1	Bai1	0.95595	-0.0649923	0.115632	0.766246
Q8VCR7	Q8VCR7	Alpha/beta hydrolase domain-containing protein 14B	Abhd14b	1.09608	0.132353	0.111313	0.773903
O08553	O08553	Dihydropyrimidinase-related protein 2	Dpysl2	0.897174	-0.15654	0.110493	0.775367
Q08890	Q08890	Iduronate 2-sulfatase	Ids	0.943976	-0.0831777	0.109318	0.777467
P56388	P56388	Cocaine- and amphetamine-regulated transcript protein;CART(1-52);CART(55-102);CART(62-102)	Cartpt	0.936407	-0.0947925	0.108228	0.77942
Q6NZL8	Q6NZL8	Signal peptide, CUB and EGF-like domain-containing protein 1	Scube1	1.13187	0.178712	0.107832	0.780132
P45700	P45700	Mannosyl-oligosaccharide 1,2-alpha-mannosidase IA	Man1a1	0.965381	-0.0508297	0.107716	0.78034
Q8R1I2	Q8R1I2	Gastrin-releasing peptide;Neuromedin-C	Grp	1.02888	0.0410717	0.103383	0.788165
P20152;P31001;P15331;P46660;P08551;P08553	P20152	Vimentin	Vim	0.930669	-0.10366	0.101388	0.791795
P55066	P55066	Neurocan core protein	Ncan	0.948059	-0.0769507	0.0993738	0.795474
Q9QUR8	Q9QUR8	Semaphorin-7A	Sema7a	0.96634	-0.0493967	0.0993029	0.795604
Q9DAK9	Q9DAK9	14 kDa phosphohistidine phosphatase	Phpt1	0.91688	-0.125195	0.0986429	0.796814
Q8K135	Q8K135	Dyslexia-associated protein KIAA0319-like protein	Kiaa0319l	0.947006	-0.078554	0.098258	0.797521
Q62288	Q62288	Testican-1	Spock1	1.03718	0.052668	0.0981276	0.79776
Q8CEF9	Q8CEF9	Transmembrane protein 132C	Tmem132c	1.04582	0.06463	0.0948717	0.803763
Q8BKV0	Q8BKV0	Testican-3	Spock3	0.946889	-0.078733	0.0938185	0.805715
P21614;CON__Q3MHN5;CON__ENSEMBL:ENSBTAP00000018229	P21614	Vitamin D-binding protein	Gc	1.05455	0.0766277	0.0923275	0.808486
P62259	P62259	14-3-3 protein epsilon	Ywhae	1.09218	0.127206	0.0914595	0.810103
P06837	P06837	Neuromodulin	Gap43	0.928284	-0.107363	0.0908116	0.811313
P14106	P14106	Complement C1q subcomponent subunit B	C1qb	0.955	-0.066427	0.0894216	0.813914
P19157;P46425	P19157	Glutathione S-transferase P 1	Gstp1	0.9298	-0.105007	0.0890228	0.814662
Q60648	Q60648	Ganglioside GM2 activator	Gm2a	1.03788	0.0536357	0.0884517	0.815733
Q8VCF1	Q8VCF1	Soluble calcium-activated nucleotidase 1	Cant1	0.969245	-0.045067	0.0882505	0.816112
Q07235	Q07235	Glia-derived nexin	Serpine2	1.02125	0.03034	0.0849959	0.82225
O08532	O08532	Voltage-dependent calcium channel subunit alpha-2/delta-1;Voltage-dependent calcium channel subunit alpha-2-1;Voltage-dependent calcium channel subunit delta-1	Cacna2d1	0.952547	-0.0701373	0.0849359	0.822364
O35188	O35188	Fractalkine;Processed fractalkine	Cx3cl1	1.05347	0.0751558	0.0845324	0.823128
P10852	P10852	4F2 cell-surface antigen heavy chain	Slc3a2	1.03198	0.045418	0.081286	0.829305
P18760	P18760	Cofilin-1	Cfl1	0.948387	-0.0764523	0.0778799	0.835834
P22005	P22005	Proenkephalin-A;Synenkephalin;Met-enkephalin;PENK(114-133);PENK(143-184);Met-enkephalin-Arg-Ser-Leu;Leu-enkephalin;PENK(238-259);Met-enkephalin-Arg-Phe	Penk	0.950786	-0.0728073	0.0769341	0.837656
Q99N28	Q99N28	Cell adhesion molecule 3	Cadm3	0.95328	-0.0690277	0.0753516	0.840714
P28653	P28653	Biglycan	Bgn	0.954625	-0.066994	0.074001	0.843333
P21981	P21981	Protein-glutamine gamma-glutamyltransferase 2	Tgm2	1.05735	0.0804587	0.0722197	0.846799
P54923	P54923	[Protein ADP-ribosylarginine] hydrolase	Adprh	0.963854	-0.0531133	0.0673522	0.856343
Q9CQM5	Q9CQM5	Thioredoxin domain-containing protein 17	Txndc17	1.05396	0.0758208	0.0672411	0.856562
Q8VI51	Q8VI51	VPS10 domain-containing receptor SorCS3	Sorcs3	1.06686	0.0933687	0.0670039	0.85703
Q01339;CON__P17690	Q01339	Beta-2-glycoprotein 1	Apoh	1.0263	0.037452	0.0628628	0.865241
Q08761;CON__P07224	Q08761	Vitamin K-dependent protein S	Pros1	0.96875	-0.045804	0.06121	0.86854
Q64487	Q64487	Receptor-type tyrosine-protein phosphatase delta	Ptprd	1.03288	0.046666	0.0610888	0.868783
P26339	P26339	Chromogranin-A;Pancreastatin;Beta-granin;WE-14;Catestatin;GE-25;Serpinin-RRG;Serpinin;p-Glu serpinin precursor	Chga	0.969827	-0.0442013	0.0604188	0.870124
A2AVA0	A2AVA0	Sushi, von Willebrand factor type A, EGF and pentraxin domain-containing protein 1	Svep1	0.981262	-0.0272895	0.0599631	0.871038
Q8BNJ2	Q8BNJ2	A disintegrin and metalloproteinase with thrombospondin motifs 4	Adamts4	0.966912	-0.048544	0.0597448	0.871475
P50429	P50429	Arylsulfatase B	Arsb	0.964814	-0.051678	0.0596082	0.87175
Q9Z2L6	Q9Z2L6	Multiple inositol polyphosphate phosphatase 1	Minpp1	1.01833	0.026205	0.058973	0.873026
Q6P1B3	Q6P1B3	PILR alpha-associated neural protein	Pianp	1.04068	0.0575317	0.0586983	0.873578
P70126	P70126	Alpha-2,8-sialyltransferase 8E	St8sia5	1.0591	0.0828417	0.0580903	0.874802
O35393	O35393	Ephrin-B3	Efnb3	1.02136	0.0304877	0.0554725	0.880091
Q8R422	Q8R422	CD109 antigen	Cd109	1.02054	0.0293377	0.0540288	0.883021
P10810	P10810	Monocyte differentiation antigen CD14	Cd14	0.960759	-0.057754	0.0527516	0.885622
Q8BSL7;P84078;P61205;P84084;P61750	Q8BSL7;P84078;P61205	ADP-ribosylation factor 2;ADP-ribosylation factor 1;ADP-ribosylation factor 3	Arf2;Arf1;Arf3	1.04049	0.0572665	0.0465552	0.898348
Q9D358	Q9D358	Low molecular weight phosphotyrosine protein phosphatase	Acp1	1.02114	0.0301797	0.0447799	0.902028
Q9CQ60	Q9CQ60	6-phosphogluconolactonase	Pgls	0.95856	-0.06106	0.0443333	0.902956
Q76KF0	Q76KF0	Semaphorin-6D	Sema6d	0.982285	-0.025786	0.0422275	0.907345
O88947	O88947	Coagulation factor X;Factor X light chain;Factor X heavy chain;Activated factor Xa heavy chain	F10	0.954505	-0.067176	0.0422248	0.907351
Q9JM99	Q9JM99	Proteoglycan 4;Proteoglycan 4 C-terminal part	Prg4	1.0287	0.040823	0.0421094	0.907592
Q00915	Q00915	Retinol-binding protein 1	Rbp1	0.95756	-0.062565	0.0401048	0.911791
Q6GQT1;REV__Q6QNU9	Q6GQT1	Alpha-2-macroglobulin-P	A2mp	1.0178	0.0254527	0.0398505	0.912325
Q8BQ86	Q8BQ86	Carbohydrate sulfotransferase 8	Chst8	1.04567	0.06443	0.0392859	0.913512
Q01149	Q01149	Collagen alpha-2(I) chain	Col1a2	1.01957	0.027955	0.0378417	0.916554
P09813	P09813	Apolipoprotein A-II;Proapolipoprotein A-II	Apoa2	1.05076	0.0714333	0.0373953	0.917497
P14152	P14152	Malate dehydrogenase, cytoplasmic	Mdh1	0.982636	-0.0252713	0.0343168	0.924024
O35405	O35405	Phospholipase D3	Pld3	1.01983	0.0283337	0.0341057	0.924473
Q91X88	Q91X88	Protein O-linked-mannose beta-1,2-N-acetylglucosaminyltransferase 1	Pomgnt1	1.01212	0.0173827	0.0340612	0.924568
Q9ET22	Q9ET22	Dipeptidyl peptidase 2	Dpp7	1.01916	0.0273757	0.0339425	0.924821
Q02053	Q02053	Ubiquitin-like modifier-activating enzyme 1	Uba1	1.03414	0.04843	0.0339173	0.924874
O08677	O08677	Kininogen-1;Kininogen-1 heavy chain;Bradykinin;Kininogen-1 light chain	Kng1	0.976492	-0.0343193	0.0337844	0.925157
P42703	P42703	Leukemia inhibitory factor receptor	Lifr	1.02113	0.030165	0.0320008	0.928965
Q9JJV2	Q9JJV2	Profilin-2	Pfn2	0.990953	-0.0131117	0.0269506	0.93983
P06683	P06683	Complement component C9	C9	1.01828	0.0261377	0.026684	0.940407
Q8CIF4	Q8CIF4	Biotinidase	Btd	1.00792	0.0113777	0.0233156	0.94773
P0C192;Q8C031;Q99PH1	P0C192	Leucine-rich repeat-containing protein 4B	Lrrc4b	0.984138	-0.0230677	0.0227005	0.949073
P97326	P97326	Cadherin-6	Cdh6	1.011	0.0157892	0.0224385	0.949645
P33587	P33587	Vitamin K-dependent protein C;Vitamin K-dependent protein C light chain;Vitamin K-dependent protein C heavy chain;Activation peptide	Proc	1.00963	0.0138213	0.021912	0.950797
Q810B8	Q810B8	SLIT and NTRK-like protein 4	Slitrk4	1.00672	0.00966267	0.0212814	0.952179
Q9WVH9	Q9WVH9	Fibulin-5	Fbln5	1.0102	0.0146363	0.0193446	0.956435
Q9CPT4	Q9CPT4	Myeloid-derived growth factor	Mydgf	0.994427	-0.00806267	0.0149954	0.966061
P33434	P33434	72 kDa type IV collagenase;PEX	Mmp2	1.00503	0.007239	0.013995	0.968289
Q9R0E2	Q9R0E2	Procollagen-lysine,2-oxoglutarate 5-dioxygenase 1	Plod1	1.00528	0.007594	0.0138654	0.968578
P11859;Q499E4	P11859	Angiotensinogen;Angiotensin-1;Angiotensin-2;Angiotensin-3;Angiotensin-4;Angiotensin 1-9;Angiotensin 1-7;Angiotensin 1-5;Angiotensin 1-4	Agt	0.993015	-0.0101127	0.0136606	0.969035
P19221;CON__P00735	P19221	Prothrombin;Activation peptide fragment 1;Activation peptide fragment 2;Thrombin light chain;Thrombin heavy chain	F2	1.00832	0.0119527	0.0131989	0.970066
Q9WUB3	Q9WUB3	Glycogen phosphorylase, muscle form	Pygm	0.984335	-0.0227792	0.012652	0.971288
Q61851;Q03142	Q61851;Q03142	Fibroblast growth factor receptor 3;Fibroblast growth factor receptor 4	Fgfr3;Fgfr4	1.00301	0.00433333	0.0119341	0.972895
O08842	O08842	GDNF family receptor alpha-2	Gfra2	0.993924	-0.008792	0.0103837	0.976374
Q63836;P17563	Q63836;P17563	Selenium-binding protein 2;Selenium-binding protein 1	Selenbp2;Selenbp1	0.991489	-0.0123308	0.0102707	0.976628
P16294	P16294	Coagulation factor IX;Coagulation factor IXa light chain;Coagulation factor IXa heavy chain	F9	1.00454	0.0065325	0.00881894	0.979898
Q8R242	Q8R242	Di-N-acetylchitobiase	Ctbs	1.00203	0.00293	0.00642814	0.985308
P29416	P29416	Beta-hexosaminidase subunit alpha	Hexa	0.994906	-0.007368	0.00604108	0.986186
Q61865	Q61865	Melanoma-derived growth regulatory protein	Mia	1.00527	0.00758667	0.00582872	0.986669
O89026	O89026	Roundabout homolog 1	Robo1	1.00016	0.000225333	0.00031967	0.999264
