# Supplementary material for: BACE2 distribution in major brain cell types and identification of novel substrates
Source: Life Sci Alliance. 2018 Feb 15;1(1):e201800026. doi: 10.26508/lsa.201800026 (PMC6238391; doi:10.26508/lsa.201800026)
Supplement: Supplementary file 2 [file LSA-2018-00026_TableS2.xlsx]

## Sheet: BACE2_3rep
Protein IDs	Majority protein IDs	Protein names	Gene names	Mean Ratio (CPDJ/CON)	Mean log2 (CPDJ/CON)	ttest p	QUANTS	log2 (CPDJ/CON) 1	log2 (CPDJ/CON) 2	log2 (CPDJ/CON) 3	LFQ intensity CON_1	LFQ intensity CPDJ_1	LFQ intensity CON_2	LFQ intensity CPDJ_2	LFQ intensity CON_3	LFQ intensity CPDJ_3	Peptides	Razor + unique peptides	Unique peptides	Sequence coverage [%]	Unique + razor sequence coverage [%]	Unique sequence coverage [%]	Mol. weight [kDa]	Q-value	Score	Intensity	MS/MS count	Unique peptides CON_1	Unique peptides CON_2	Unique peptides CON_3	Unique peptides CPDJ_1	Unique peptides CPDJ_2	Unique peptides CPDJ_3	iBAQ	Zero 1	Zero 2
Q02105	Q02105	Complement C1q subcomponent subunit C	C1qc	1.74993	0.8073	0.000694056	3	0.832979	0.823851	0.765069	4432400	7895700	26745000	47342000	1365500	2320600	7	7	7	31.3	31.3	31.3	25.991	0	51.777	72210000	36	4	4	5	3	3	4	6017500	0	0
P29533	P29533	Vascular cell adhesion protein 1	Vcam1	0.196215	-2.34949	0.00405731	3	-2.64175	-2.26288	-2.14386	44950000	7202500	2035600000	424130000	43743000	9897900	43	43	43	47.2	47.2	47.2	81.317	0	323.31	986850000	178	16	37	21	12	30	19	23496000	0	0
Q70E20	Q70E20	Sushi, nidogen and EGF-like domain-containing protein 1	Sned1	1.19752	0.260049	0.00653995	3	0.299343	0.253889	0.226915	1287600	1584500	266920000	318280000	1806500	2114200	20	20	20	17	17	17	151.58	0	126.56	422160000	63	7	14	3	10	17	3	6809000	0	0
Q07797	Q07797	Galectin-3-binding protein	Lgals3bp	1.07077	0.0986431	0.00961218	3	0.0816391	0.0989086	0.115382	452940000	479310000	12119000000	12979000000	185560000	201010000	41	41	41	59.8	59.8	59.8	64.49	0	323.31	10981000000	654	23	29	34	25	30	36	422340000	0	0
Q61508	Q61508	Extracellular matrix protein 1	Ecm1	1.25406	0.326612	0.0138967	3	0.381824	0.346497	0.251514	426980000	556350000	11062000000	14065000000	210180000	250210000	48	48	48	73.3	73.3	73.3	62.832	0	323.31	15114000000	649	27	33	30	28	38	34	377850000	0	0
Q8BFR4	Q8BFR4	N-acetylglucosamine-6-sulfatase	Gns	1.35795	0.441428	0.0182906	3	0.356841	0.558733	0.40871	3711800	4753400	77890000	114730000	4804600	6378100	8	8	8	18.2	18.2	18.2	61.174	0	27.556	126170000	48	5	7	4	7	7	4	4505900	0	0
P14094	P14094	Sodium/potassium-transporting ATPase subunit beta-1	Atp1b1	1.41241	0.498154	0.0256471	3	0.574669	0.335546	0.584248	2377100	3540300	10987000	13864000	518430	777260	4	4	4	11.8	11.8	11.8	35.194	0	7.4133	162250000	8	1	2	2	1	3	2	10141000	0	0
Q9QYB1	Q9QYB1	Chloride intracellular channel protein 4	Clic4	1.24071	0.311164	0.0276694	3	0.412085	0.233415	0.287992	2531100	3367900	47200000	55489000	64298	78504	7	7	7	42.3	42.3	42.3	28.729	0	28.49	59577000	30	5	5	1	4	5	1	3504500	0	0
Q9D6X6	Q9D6X6	Serine protease 23	Prss23	1.35484	0.438126	0.0315624	3	0.387397	0.594425	0.332557	25900000	33878000	30696000	46347000	373510	470340	14	14	14	36.1	36.1	36.1	43.071	0	38.702	189280000	49	8	5	4	7	8	4	7886800	0	0
P98064	P98064	Mannan-binding lectin serine protease 1;Mannan-binding lectin serine protease 1 heavy chain;Mannan-binding lectin serine protease 1 light chain	Masp1	0.726031	-0.461897	0.0341124	3	-0.631194	-0.416073	-0.338422	27396000	17688000	1765000000	1322800000	3329600	2633400	17	17	17	30.4	30.4	30.4	79.967	0	141.47	1139600000	121	8	15	4	10	15	3	34533000	0	0
P28653	P28653	Biglycan	Bgn	1.33925	0.421425	0.0341956	3	0.562661	0.28571	0.415904	82641000	122060000	3330900000	4060400000	18726000	24983000	27	27	26	58	58	58	41.639	0	323.31	4596000000	473	16	21	10	18	21	13	241890000	0	0
Q9CYK2	Q9CYK2	Glutaminyl-peptide cyclotransferase	Qpct	0.93167	-0.102109	0.0345574	3	-0.0655	-0.13201	-0.108817	976210	932880	5548900	5063700	33695	31247	5	5	5	16.3	16.3	16.3	41.118	0	17.196	17356000	11	4	3	2	4	3	2	913460	0	0
Q8JZM4	Q8JZM4	Delta and Notch-like epidermal growth factor-related receptor	Dner	0.268836	-1.8952	0.0367731	3	-2.25637	-1.1477	-2.28153	2643700	553320	173110000	78132000	6648200	1367400	5	5	5	8	8	8	78.747	0	74.281	166570000	34	4	4	3	4	4	3	6406400	0	0
Q8BJD1	Q8BJD1	Inter-alpha-trypsin inhibitor heavy chain H5	Itih5	1.2833	0.359856	0.0380517	3	0.261403	0.317423	0.500743	3421200	4100800	182160000	226990000	3754500	5312400	20	20	20	27.3	27.3	27.3	106.75	0	162.95	556640000	95	8	17	10	8	16	10	8697600	0	0
Q9DC11	Q9DC11	Plexin domain-containing protein 2	Plxdc2	0.645861	-0.630705	0.0469027	3	-0.364621	-0.847836	-0.679658	9825500	7631200	1024500000	569230000	7246200	4523900	10	10	10	22.6	22.6	22.6	59.616	0	55.461	880130000	82	3	10	6	3	9	6	36672000	0	0
P16092	P16092	Fibroblast growth factor receptor 1	Fgfr1	0.524835	-0.930065	0.0471359	3	-0.512769	-1.10798	-1.16945	5445900	3816900	206210000	95670000	2960700	1316300	8	8	8	10	10	10	91.98	0	42.042	227350000	42	5	7	3	5	7	3	5983000	0	0
Q8C4U3	Q8C4U3	Secreted frizzled-related protein 1	Sfrp1	1.64906	0.721645	0.0567932	3	0.449157	0.654871	1.06091	68267000	93201000	34045000	53603000	95660	199570	11	11	11	43	43	43	35.412	0	81.208	678270000	74	11	7	2	11	6	3	45218000	0	0
Q9QUM9	Q9QUM9	Proteasome subunit alpha type-6	Psma6	1.18216	0.241425	0.0707054	3	0.142115	0.371164	0.210997	48212000	53203000	92578000	119740000	290880	336690	12	12	12	42.3	42.3	42.3	27.372	0	36.563	228450000	58	10	8	4	9	8	4	13438000	0	0
P07214	P07214	SPARC	Sparc	0.795803	-0.329517	0.071352	3	-0.404577	-0.14446	-0.439515	886840000	669970000	3702700000	3349900000	98040000	72293000	29	29	29	71.2	71.2	71.2	34.45	0	323.31	19052000000	539	19	23	23	18	24	25	1270100000	0	0
Q8CCH2	Q8CCH2	NHL repeat-containing protein 3	Nhlrc3	1.55436	0.636322	0.072108	3	0.36789	0.980356	0.56072	3287500	4242400	7897300	15581000	137430	202710	7	7	7	28.8	28.8	28.8	38.195	0	48.737	71695000	30	6	4	3	6	4	3	3584700	0	0
P48759	P48759	Pentraxin-related protein PTX3	Ptx3	1.97307	0.980445	0.0773658	3	0.430291	1.41349	1.09755	13571000	18287000	35334000	94123000	2780300	5949600	15	15	15	44.1	44.1	44.1	41.811	0	136.35	352570000	65	10	10	5	12	11	8	16026000	0	0
O88632;O08665	O88632	Semaphorin-3F	Sema3f	1.44718	0.533247	0.0811397	3	0.342301	0.855236	0.402204	8135500	10314000	39315000	71123000	701190	926640	10	10	10	12.5	12.5	12.5	88.548	0	94.173	68981000	37	5	5	3	5	5	3	1352600	0	0
Q03350	Q03350	Thrombospondin-2	Thbs2	1.17904	0.237609	0.0811971	3	0.375459	0.131568	0.205801	803930	1042900	151020000	165440000	297470	343080	16	16	16	18.9	18.9	18.9	129.88	0	317.47	220270000	56	5	15	2	6	14	3	4588900	0	0
Q9JM58	Q9JM58	Cytokine receptor-like factor 1	Crlf1	1.40034	0.485773	0.0819215	3	0.619364	0.189624	0.648329	672830	1033600	4858800	5541300	623440	977150	4	4	4	12	12	12	46.661	0	7.613	83372000	15	4	3	2	4	3	3	3334900	0	0
O88207	O88207	Collagen alpha-1(V) chain	Col5a1	1.06095	0.0853575	0.0994566	3	0.0592134	0.143537	0.0533224	23820000	24818000	2013200000	2223800000	12350000	12815000	30	27	27	23	20.6	20.6	183.67	0	323.31	1754400000	290	12	24	5	12	24	7	18087000	0	0
B2RXS4	B2RXS4	Plexin-B2	Plxnb2	1.39884	0.484232	0.108701	3	0.371086	0.826147	0.255464	7642700	9884500	270110000	478890000	3149400	3759500	35	35	35	28.9	28.9	28.9	206.23	0	288.03	534370000	116	15	26	7	23	29	9	5343700	0	0
Q61592	Q61592	Growth arrest-specific protein 6	Gas6	1.36773	0.451786	0.110403	3	0.775411	0.336437	0.243511	34177000	58500000	1306000000	1649000000	459890	544450	28	28	28	49.7	49.7	49.7	74.609	0	323.31	1145400000	167	21	27	2	22	27	2	29368000	0	0
Q9EQS9	Q9EQS9	Immunoglobulin superfamily DCC subclass member 4	Igdcc4	1.36851	0.45261	0.115179	3	0.205209	0.774556	0.378066	369440	425910	87317000	149370000	420630	546650	10	10	10	8	8	8	134.76	0	43.814	108310000	49	2	8	2	4	9	3	1867500	0	0
P11087;CON__Q862S4	P11087	Collagen alpha-1(I) chain	Col1a1	0.881277	-0.182333	0.118873	3	-0.121017	-0.105551	-0.320431	119810000	110170000	4952500000	4603100000	5104200	4087600	64	64	63	61.8	61.8	60.8	138.03	0	323.31	5747300000	641	42	57	9	41	59	8	65310000	0	0
Q08879	Q08879	Fibulin-1	Fbln1	1.12497	0.169884	0.122248	3	0.117666	0.300172	0.0918136	4904800	5321600	707680000	871360000	4921700	5245100	29	22	22	40	33.9	33.9	78.032	0	323.31	485330000	96	7	20	8	6	19	9	13867000	0	0
Q8BMS2	Q8BMS2	Spondin-2	Spon2	1.56445	0.645651	0.122859	3	0.600053	1.09958	0.237316	630200	955240	29392000	62985000	227240	267870	6	6	6	28.8	28.8	28.8	35.964	0	24.325	122830000	17	3	5	2	3	5	2	7676700	0	0
Q62000	Q62000	Mimecan	Ogn	1.15639	0.209631	0.126024	3	0.140265	0.373821	0.114807	130940000	144310000	646900000	838240000	14234000	15413000	26	26	26	57.4	57.4	57.4	34.012	0	323.31	3418500000	319	17	22	15	14	22	16	227900000	0	0
O35310	O35310	Heparan sulfate glucosamine 3-O-sulfotransferase 1	Hs3st1	1.42646	0.512443	0.126025	3	0.198005	0.887916	0.451406	6222500	7137900	28502000	52743000	1751900	2395500	9	9	9	26.7	26.7	26.7	35.899	0	14.221	234370000	46	5	6	7	4	6	8	13787000	0	0
P21180	P21180	Complement C2;Complement C2b fragment;Complement C2a fragment	C2	1.68633	0.753889	0.12696	3	0.214131	0.805876	1.24166	5524200	6408100	338810000	592310000	1362200	3221200	21	21	21	32.4	32.4	32.4	84.741	0	142.52	279750000	79	8	20	3	8	19	3	6358000	0	0
P58252	P58252	Elongation factor 2	Eef2	0.774146	-0.369322	0.134681	3	-0.222227	-0.213921	-0.671817	14577000	12496000	334520000	288420000	367810	230880	25	25	25	35.3	35.3	35.3	95.313	0	167.07	231270000	82	15	21	2	15	22	3	4363600	0	0
Q9EPL2	Q9EPL2	Calsyntenin-1;Soluble Alc-alpha;CTF1-alpha	Clstn1	1.20654	0.270875	0.139573	3	0.0968573	0.231825	0.483943	131190000	140300000	6757700000	7935700000	211210000	295390000	63	63	63	55.5	55.5	55.5	108.9	0	323.31	8207600000	673	32	44	37	42	45	41	195420000	0	0
Q8VCF1	Q8VCF1	Soluble calcium-activated nucleotidase 1	Cant1	1.39826	0.483631	0.141416	3	0.51532	0.820404	0.115167	3070500	4388700	25015000	44174000	236460	256110	15	15	15	40.9	40.9	40.9	45.652	0	64.434	121190000	40	10	8	3	9	9	3	4039600	0	0
Q9CQ01	Q9CQ01	Ribonuclease T2	Rnaset2	0.784637	-0.349903	0.145651	3	-0.36422	-0.0823576	-0.603131	9973500	7748300	34909000	32972000	262500	172810	7	7	7	24.3	24.3	24.3	29.608	0	149.75	114430000	37	6	6	2	6	6	3	8173800	0	0
P23336	P23336	N-acetyllactosaminide alpha-1,3-galactosyltransferase	Ggta1	1.32001	0.400553	0.15708	3	0.597947	0.0394999	0.564211	1943100	2941000	17833000	18328000	341950	505600	8	8	8	28.4	28.4	28.4	46.475	0	61.579	80173000	26	2	5	2	2	5	3	3644200	0	0
P10605	P10605	Cathepsin B;Cathepsin B light chain;Cathepsin B heavy chain	Ctsb	1.66113	0.732162	0.158699	3	1.34522	0.649452	0.201816	83013000	210910000	510120000	800160000	96127000	110560000	29	29	29	62.8	62.8	62.8	37.279	0	323.31	6063800000	357	15	21	23	17	20	25	319150000	0	0
Q61362	Q61362	Chitinase-3-like protein 1	Chi3l1	1.27929	0.355343	0.160027	3	0.409653	0.605372	0.0510051	479130	636460	19138000	29116000	1417200	1468200	10	10	10	32.6	32.6	32.6	43.893	0	242.16	110220000	35	3	8	6	3	9	5	5010100	0	0
Q8CG16;Q8CFG9;Q3UZ09	Q8CG16;Q8CFG9	Complement C1r-A subcomponent;Complement C1r-A subcomponent heavy chain;Complement C1r-A subcomponent light chain;Complement C1r-B subcomponent;Complement C1r-B subcomponent heavy chain;Complement C1r-B subcomponent light chain	C1ra;C1rb	1.29446	0.372353	0.160883	3	0.0785667	0.368713	0.66978	27855000	29414000	1484200000	1916400000	10949000	17418000	32	32	32	55.9	55.9	55.9	80.072	0	323.31	1407000000	191	15	27	16	14	27	16	38028000	0	0
P61982	P61982	14-3-3 protein gamma;14-3-3 protein gamma, N-terminally processed	Ywhag	1.18588	0.245953	0.162822	3	0.393912	0.321334	0.0226113	14894000	19570000	140930000	176090000	1886500	1916300	17	13	11	57.9	57.9	51.4	28.302	0	259.25	204140000	44	6	5	4	7	6	4	11341000	0	0
P12023	P12023	Amyloid beta A4 protein;N-APP;Soluble APP-alpha;Soluble APP-beta;C99;Beta-amyloid protein 42;Beta-amyloid protein 40;C83;P3(42);P3(40);C80;Gamma-secretase C-terminal fragment 59;Gamma-secretase C-terminal fragment 57;Gamma-secretase C-terminal fragment 50;C31	App	1.25505	0.327742	0.165402	3	0.0654163	0.595213	0.322597	156510000	163770000	3080700000	4654000000	78450000	98108000	34	34	31	40.8	40.8	39.6	86.721	0	323.31	4815000000	647	24	25	11	25	25	14	120380000	0	0
O09114	O09114	Prostaglandin-H2 D-isomerase	Ptgds	1.22883	0.297288	0.16829	3	0.305371	0.536204	0.0502904	19437000	24019000	259690000	376590000	2638600	2732200	7	7	7	29.6	29.6	29.6	21.066	0	58.696	256360000	56	5	4	6	6	4	6	32045000	0	0
Q9R0E2	Q9R0E2	Procollagen-lysine,2-oxoglutarate 5-dioxygenase 1	Plod1	1.2729	0.348117	0.170863	3	0.543235	0.483121	0.0179958	1675500	2441600	73174000	102280000	2676900	2710500	20	20	19	31.9	31.9	30.5	83.594	0	314.46	95709000	57	5	11	8	7	13	8	2225800	0	0
P55065	P55065	Phospholipid transfer protein	Pltp	1.14929	0.200746	0.170924	3	0.377898	0.175067	0.0492719	195460000	253990000	9246100000	10439000000	358350000	370800000	33	33	33	64.7	64.7	64.7	54.452	0	323.31	22255000000	773	20	22	28	19	22	30	890190000	0	0
Q6DIB5	Q6DIB5	Multiple epidermal growth factor-like domains protein 10	Megf10	0.656949	-0.606146	0.171303	3	-1.14669	-0.515486	-0.156265	5481100	2475600	277690000	194260000	5601300	5026300	19	19	19	18	18	18	122.97	0	267.55	192150000	94	12	17	5	12	18	7	4269900	0	0
Q91ZX7	Q91ZX7	Prolow-density lipoprotein receptor-related protein 1;Low-density lipoprotein receptor-related protein 1 85 kDa subunit;Low-density lipoprotein receptor-related protein 1 515 kDa subunit;Low-density lipoprotein receptor-related protein 1 intracellular domain	Lrp1	1.22035	0.287291	0.171388	3	0.0925	0.552179	0.217195	3832900	4086700	101480000	148800000	974820	1133200	34	34	34	10.5	10.5	10.5	504.74	0	114.51	246660000	113	13	30	6	17	29	6	978830	0	0
Q640N1	Q640N1	Adipocyte enhancer-binding protein 1	Aebp1	1.22949	0.298056	0.174147	3	0.0770374	0.248917	0.568213	72252000	76215000	8167700000	9705800000	64371000	95442000	43	43	42	34.6	34.6	34.6	128.36	0	323.31	13431000000	568	16	36	18	18	38	21	268620000	0	0
O09164	O09164	Extracellular superoxide dismutase [Cu-Zn]	Sod3	0.759453	-0.396968	0.174354	3	-0.553179	-0.622296	-0.0154296	291130000	198410000	1443700000	937880000	70596000	69845000	22	22	22	70.1	70.1	70.1	27.392	0	323.31	3423400000	330	16	17	18	15	17	17	263340000	0	0
Q9QXV0	Q9QXV0	ProSAAS;KEP;Big SAAS;Little SAAS;Big PEN-LEN;PEN;PEN-20;PEN-19;Little LEN;Big LEN	Pcsk1n	1.51545	0.599751	0.182646	3	0.0821565	0.599412	1.11768	3592200	3802700	211940000	321110000	4360400	9462000	15	15	15	45	45	45	27.27	0	116.35	202820000	103	4	10	8	6	8	11	13522000	0	0
O35696	O35696	Alpha-2,8-sialyltransferase 8B	St8sia2	0.862111	-0.214055	0.182855	3	-0.0138412	-0.249843	-0.378482	8232000	8153400	362300000	304690000	4820300	3708000	15	15	15	41.3	41.3	41.3	42.41	0	81.175	451540000	134	5	12	7	7	11	6	18062000	0	0
P11152	P11152	Lipoprotein lipase	Lpl	1.19419	0.25603	0.186641	3	0.434444	0.0042504	0.329396	10541000	14245000	64396000	64586000	334130	419830	9	9	9	21.7	21.7	21.7	53.109	0	87.796	202790000	50	6	7	5	6	7	5	7799700	0	0
O88531	O88531	Palmitoyl-protein thioesterase 1	Ppt1	0.712262	-0.489521	0.190812	3	-0.100579	-0.408219	-0.959765	5037000	4697800	16113000	12142000	329190	169250	7	7	7	29.1	29.1	29.1	34.49	0	76.299	57886000	39	4	3	5	4	4	5	3617800	0	0
Q5MJS3	Q5MJS3	Extracellular serine/threonine protein kinase FAM20C	Fam20c	1.14722	0.19814	0.19727	3	0.135191	0.057776	0.401453	10841000	11906000	275820000	287090000	2411500	3185200	20	20	19	41.6	41.6	39.6	65.765	0	150.02	433100000	80	9	15	6	12	14	7	13971000	0	0
P52480;P53657	P52480	Pyruvate kinase PKM	Pkm	1.34895	0.431834	0.198376	3	0.684861	-0.0226379	0.63328	4717000	7582800	99814000	98260000	20563000	31895000	14	14	14	37.5	37.5	37.5	57.844	0	79.683	423740000	58	7	9	4	8	5	4	11151000	0	0
P70663	P70663	SPARC-like protein 1	Sparcl1	1.26262	0.336423	0.210323	3	0.58036	-0.0260615	0.454972	82155000	122840000	15026000000	14757000000	208520000	285830000	57	57	57	61.7	61.7	61.7	72.286	0	323.31	13240000000	797	27	49	23	29	44	25	389420000	0	0
P97298	P97298	Pigment epithelium-derived factor	Serpinf1	0.905952	-0.142494	0.234422	3	-0.18621	-0.26232	0.0210478	1594700000	1401600000	5287700000	4408600000	347710000	352820000	49	49	44	76	76	76	46.233	0	323.31	45372000000	1373	23	27	42	22	25	41	2062400000	0	0
P55066	P55066	Neurocan core protein	Ncan	1.23472	0.304183	0.235753	3	0.470899	-0.0584406	0.500092	257350000	356680000	3939700000	3783300000	512860000	725340000	65	65	65	36.6	36.6	36.6	137.2	0	323.31	12113000000	731	34	34	51	36	34	56	263330000	0	0
O88307	O88307	Sortilin-related receptor	Sorl1	0.816996	-0.2916	0.236142	3	0.0356092	-0.35152	-0.558888	430180	440930	14530000	11388000	281280	190940	9	9	9	4.5	4.5	4.5	247.08	0	23.117	25962000	24	4	6	2	8	6	2	204430	0	0
Q6S5C2	Q6S5C2	N-acetylglucosamine-1-phosphotransferase subunit gamma	Gnptg	1.27733	0.353135	0.237516	3	0.757117	0.261992	0.0402966	2596400	4388200	21468000	25743000	1009700	1038300	7	7	7	27.7	27.7	27.7	34.168	0	66.892	89545000	42	5	5	4	5	5	4	6396100	0	0
Q62356	Q62356	Follistatin-related protein 1	Fstl1	0.753954	-0.407451	0.240842	3	-0.00172238	-0.854461	-0.36617	494490000	493900000	5667800000	3134700000	136420000	105840000	37	37	37	76.5	76.5	76.5	34.554	0	323.31	21607000000	747	18	27	28	18	27	28	1028900000	0	0
B9EKR1	B9EKR1	Receptor-type tyrosine-protein phosphatase zeta	Ptprz1	1.05376	0.0755467	0.246294	3	0.0193432	0.167992	0.039305	21707000	22000000	1037300000	1165400000	24621000	25301000	19	19	19	6.7	6.7	6.7	254.4	0	323.31	1844400000	246	12	15	10	12	15	11	19212000	0	0
Q8R4G6	Q8R4G6	Alpha-1,6-mannosylglycoprotein 6-beta-N-acetylglucosaminyltransferase A	Mgat5	1.35682	0.440225	0.251683	3	0.296253	0.0508221	0.973599	111910000	137420000	2766700000	2865900000	15276000	29998000	47	47	46	58.6	58.6	58.6	84.55	0	323.31	2157000000	321	25	40	12	28	37	14	52610000	0	0
P50247	P50247	Adenosylhomocysteinase	Ahcy	1.35018	0.433157	0.253034	3	0.0614886	0.964484	0.273498	6554600	6840000	10178000	19861000	858170	1037300	14	14	14	38.9	38.9	38.9	47.688	0	50.585	171920000	34	7	6	7	7	5	9	6612400	0	0
P62984;P62983;P0CG49;P0CG50	P62984;P62983;P0CG49;P0CG50	Ubiquitin-60S ribosomal protein L40;Ubiquitin;60S ribosomal protein L40;Ubiquitin-40S ribosomal protein S27a;Ubiquitin;40S ribosomal protein S27a;Polyubiquitin-B;Ubiquitin;Polyubiquitin-C;Ubiquitin;Ubiquitin-related 1;Ubiquitin-related 2	Uba52;Rps27a;Ubb;Ubc	0.885266	-0.175816	0.255665	3	0.0428851	-0.247087	-0.323247	7997500	8238800	190910000	160860000	943950	754470	4	4	4	30.5	30.5	30.5	14.728	0	86.329	199290000	54	2	3	3	2	2	3	22143000	0	0
P10493	P10493	Nidogen-1	Nid1	1.06852	0.0956123	0.255947	3	0.169679	-0.0247405	0.141898	30671000	34499000	6528400000	6417400000	14184000	15650000	59	59	59	60.6	60.6	60.6	136.54	0	323.31	7173500000	466	27	53	14	37	53	16	132840000	0	0
Q5RJI4	Q5RJI4	Extracellular tyrosine-protein kinase PKDCC	Pkdcc	1.18494	0.24481	0.25739	3	-0.0290036	0.511666	0.251767	136160	133450	10531000	15014000	1060500	1262700	7	7	7	11.6	11.6	11.6	53.841	0	26.387	50659000	21	2	3	4	2	3	6	2202600	0	0
P70389	P70389	Insulin-like growth factor-binding protein complex acid labile subunit	Igfals	1.56105	0.642514	0.2588	3	1.45667	0.131587	0.339284	2486900	6825900	93154000	102050000	975000	1233500	3	3	3	3.2	3.2	3.2	66.959	0	56.179	166120000	29	2	1	2	2	1	2	6644900	0	0
Q80W15	Q80W15	Insulin-like growth factor-binding protein-like 1	Igfbpl1	1.19655	0.258881	0.25924	3	0.455332	0.392455	-0.0711434	5543000	7600000	274610000	360460000	30426000	28962000	17	17	17	63.7	63.7	63.7	28.572	0	230.74	864010000	135	6	6	14	8	7	15	50824000	0	0
O88322	O88322	Nidogen-2	Nid2	1.10319	0.141683	0.262886	3	0.210533	0.254746	-0.0402292	91875000	106310000	1710800000	2041200000	168730000	164090000	66	66	66	65.3	65.3	65.3	153.91	0	323.31	4404600000	756	46	39	32	47	39	39	68821000	0	0
Q02819	Q02819	Nucleobindin-1	Nucb1	1.14769	0.198739	0.268497	3	0.432712	0.183814	-0.0203085	15333000	20696000	91233000	103630000	4278100	4218300	23	23	23	51.9	51.9	51.9	53.408	0	323.31	1549600000	127	15	13	12	16	14	11	51653000	0	0
P63101	P63101	14-3-3 protein zeta/delta	Ywhaz	1.12517	0.170145	0.278286	3	0.387465	0.128739	-0.00576872	76860000	100540000	641540000	701420000	6715800	6689000	26	26	20	71.4	71.4	65.3	27.771	0	323.31	875860000	163	15	15	10	16	16	12	46098000	0	0
Q06890	Q06890	Clusterin;Clusterin beta chain;Clusterin alpha chain	Clu	0.913505	-0.130515	0.278644	3	-0.221452	0.0466733	-0.216766	3730900000	3200000000	18400000000	19005000000	2589100000	2227900000	54	54	54	55.4	55.4	55.4	51.655	0	323.31	86446000000	1756	34	42	46	31	43	47	3929300000	0	0
P62259	P62259	14-3-3 protein epsilon	Ywhae	0.985325	-0.0213277	0.280423	3	-0.0163242	0.00100282	-0.0486617	31463000	31109000	100670000	100740000	1806000	1746100	22	19	19	72.5	72.5	72.5	29.174	0	100.48	241380000	95	13	12	6	11	14	6	13410000	0	0
Q04857	Q04857	Collagen alpha-1(VI) chain	Col6a1	1.22894	0.29741	0.283684	3	-0.0635917	0.645715	0.310107	3518000	3366300	529960000	829130000	7769400	9632500	33	33	33	38	38	38	108.49	0	323.31	748260000	178	16	27	8	18	30	11	12682000	0	0
Q923D2	Q923D2	Flavin reductase (NADPH)	Blvrb	1.31101	0.390683	0.286778	3	0.908495	0.273317	-0.00976403	4566600	8571900	198290000	239650000	2772400	2753700	2	2	2	13.1	13.1	13.1	22.197	0	9.5375	141560000	22	2	2	2	2	2	2	10889000	0	0
Q61398	Q61398	Procollagen C-endopeptidase enhancer 1	Pcolce	1.12172	0.165714	0.2912	3	0.386378	-0.0100313	0.120795	7862400	10277000	103910000	103190000	1164500	1266200	10	10	10	27.6	27.6	27.6	50.167	0	240.41	781140000	84	7	9	4	7	7	4	31245000	0	0
Q9R1Q9	Q9R1Q9	V-type proton ATPase subunit S1	Atp6ap1	1.56802	0.648942	0.296308	3	0.44201	-0.0298095	1.53462	60871000	82693000	309530000	303200000	1244300	3604900	11	11	11	28.5	28.5	28.5	51.007	0	105.79	449640000	79	9	5	2	9	6	2	29976000	0	0
Q3TA59	Q3TA59	JmjC domain-containing protein 8	Jmjd8	0.829211	-0.270188	0.296552	3	-0.316355	0.0848416	-0.579051	1905500	1530300	26118000	27700000	1216500	814330	4	4	4	20.3	20.3	20.3	35.538	0	169.69	99474000	29	2	2	4	2	2	4	6631600	0	0
Q3UPI1	Q3UPI1	Protein FAM198B	Fam198b	1.03212	0.0456168	0.298105	3	0.098868	0.0519701	-0.0139878	3587900	3842400	172030000	178340000	792850	785200	13	13	13	27.9	27.9	27.9	58.297	0	118.3	258720000	69	4	11	4	5	11	4	8084900	0	0
P16125	P16125	L-lactate dehydrogenase B chain	Ldhb	0.823307	-0.280497	0.302103	3	-0.421778	0.120777	-0.54049	67654000	50504000	393610000	427980000	19964000	13726000	17	14	14	50.6	50.6	50.6	36.572	0	188.95	1059400000	131	10	12	8	10	12	7	50448000	0	0
P11276	P11276	Fibronectin;Anastellin	Fn1	1.15568	0.208743	0.303612	3	0.00574088	0.114009	0.506479	203150000	203960000	6735900000	7289800000	268630000	381610000	144	144	144	62.5	62.5	62.5	272.53	0	323.31	15364000000	1336	67	103	79	83	100	92	131310000	0	0
Q02053;P31254	Q02053	Ubiquitin-like modifier-activating enzyme 1	Uba1	1.22228	0.289575	0.306676	3	0.709578	0.0197448	0.139402	1962300	3209000	186500000	189070000	383250	422130	18	18	18	26.7	26.7	26.7	117.81	0	323.31	109300000	67	7	18	2	7	18	2	1884400	0	0
Q01149	Q01149	Collagen alpha-2(I) chain	Col1a2	0.889911	-0.168267	0.312498	3	-0.0587038	-0.418959	-0.0271375	38622000	37082000	1301800000	973700000	345060	338630	43	43	43	50.7	50.7	50.7	129.56	0	323.31	1282100000	376	29	38	2	31	37	2	16026000	0	0
Q9R0B9	Q9R0B9	Procollagen-lysine,2-oxoglutarate 5-dioxygenase 2	Plod2	0.894711	-0.160507	0.31426	3	-0.378451	0.0374065	-0.140477	4031000	3100900	227660000	233640000	4983800	4521400	22	22	22	33.8	33.8	33.8	84.487	0	131.27	176480000	61	3	18	5	4	19	4	4010900	0	0
P06909	P06909	Complement factor H	Cfh	0.902797	-0.147526	0.315638	3	-0.350206	-0.125237	0.0328633	26224000	20572000	2229800000	2044400000	14149000	14475000	55	55	55	45.5	45.5	45.5	139.14	0	323.31	2598300000	306	29	46	19	29	42	22	38210000	0	0
Q61112	Q61112	45 kDa calcium-binding protein	Sdf4	0.773581	-0.370375	0.319158	3	0.0684701	-0.283706	-0.895888	7135200	7482000	18065000	14840000	174390	93720	13	13	13	34.3	34.3	34.3	42.064	0	129.26	275890000	47	11	4	2	9	3	2	12541000	0	0
Q9QUN9	Q9QUN9	Dickkopf-related protein 3	Dkk3	0.825462	-0.276726	0.322451	3	-0.693126	0.00431063	-0.141363	4190700	2592000	748570000	750810000	4608000	4177900	15	15	15	45	45	45	38.387	0	202.91	1437000000	129	6	13	9	7	13	9	84529000	0	0
Q8BU25	Q8BU25	Inactive serine protease PAMR1	Pamr1	1.21262	0.278122	0.323737	3	-0.149539	0.514482	0.469421	7759400	6995400	954580000	1363600000	1371200	1898500	26	26	26	42.4	42.4	42.4	80.319	0	128.74	806430000	113	8	22	6	8	22	8	18754000	0	0
P14152	P14152	Malate dehydrogenase, cytoplasmic	Mdh1	0.810634	-0.302877	0.32751	3	-0.11867	-0.770765	-0.0191956	11271000	10381000	29179000	17102000	252700	249360	7	7	7	32.9	32.9	32.9	36.511	0	69.949	82609000	29	6	4	3	6	4	3	3933800	0	0
P33434	P33434	72 kDa type IV collagenase;PEX	Mmp2	1.19877	0.26156	0.330449	3	-0.147714	0.49193	0.440466	4093700	3695300	188150000	264600000	510920	693340	27	27	27	49.7	49.7	49.7	74.102	0	227.21	778600000	72	8	21	5	8	18	5	22246000	0	0
P37889	P37889	Fibulin-2	Fbln2	0.932904	-0.100199	0.331724	3	-0.171044	0.0572785	-0.186832	34839000	30944000	1404900000	1461800000	7483500	6574500	45	45	45	40.8	40.8	40.8	131.83	0	323.31	2093000000	360	24	41	14	25	38	16	41039000	0	0
Q9WVJ9	Q9WVJ9	EGF-containing fibulin-like extracellular matrix protein 2	Efemp2	0.901464	-0.149658	0.334952	3	-0.153054	0.0578436	-0.353765	270130	242940	25618000	26666000	5023900	3931400	15	15	15	41.3	41.3	41.3	49.425	0	81.134	294410000	41	2	4	13	3	4	12	11776000	0	0
P02463	P02463	Collagen alpha-1(IV) chain;Arresten	Col4a1	0.696995	-0.52078	0.344882	3	-0.199848	-0.000194216	-1.3623	2793800	2432400	371440000	371390000	1347200	524010	11	11	11	9.8	9.8	9.8	160.68	0	128.36	511070000	102	6	10	3	9	9	2	6232600	0	0
Q61810	Q61810	Latent-transforming growth factor beta-binding protein 3	Ltbp3	1.28305	0.359574	0.350414	3	-0.232415	0.602305	0.708832	5604500	4770600	54576000	82854000	654520	1069800	16	16	16	17.1	17.1	17.1	135.7	0	193.17	134670000	65	12	10	2	13	8	4	2207700	0	0
Q9JHI0	Q9JHI0	Matrix metalloproteinase-19	Mmp19	1.62621	0.701509	0.354553	3	1.85269	-0.0735827	0.325418	408640	1475900	87381000	83036000	4112200	5152700	8	8	8	19.2	19.2	19.2	59.121	0	128.76	250460000	41	2	6	5	2	6	5	9276300	0	0
P17182;P17183	P17182	Alpha-enolase	Eno1	0.696433	-0.521944	0.354969	3	0.0133706	-1.38843	-0.190777	30502000	30786000	454080000	173450000	4521000	3961000	30	30	26	70	70	58.3	47.14	0	323.31	1593400000	154	15	17	15	16	15	16	56907000	0	0
P48441	P48441	Alpha-L-iduronidase	Idua	1.24027	0.310658	0.35783	3	-0.196264	0.680523	0.447716	10058000	8778700	314690000	504360000	9170900	12508000	18	18	18	29.3	29.3	29.3	71.253	0	107.17	362260000	90	12	12	10	12	12	10	13933000	0	0
Q9JK53	Q9JK53	Prolargin	Prelp	1.21269	0.278217	0.365456	3	0.737374	-0.0702441	0.16752	45175000	75313000	74511000	70970000	431590	484730	20	20	20	43.7	43.7	43.7	43.292	0	119.41	2333700000	135	17	8	4	16	8	4	93347000	0	0
P12032	P12032	Metalloproteinase inhibitor 1	Timp1	0.757979	-0.399771	0.373753	3	-1.07118	0.11878	-0.246908	85494000	40689000	415890000	451580000	5118900	4313700	11	11	11	47.8	47.8	47.8	22.628	0	32.886	579790000	58	6	7	6	6	6	7	48316000	0	0
Q8BND5	Q8BND5	Sulfhydryl oxidase 1	Qsox1	1.19311	0.254733	0.374306	3	-0.09842	0.190998	0.67162	114490000	106940000	4337600000	4951600000	61350000	97722000	43	43	43	56.8	56.8	56.8	82.784	0	323.31	6568100000	590	27	37	25	27	34	26	139750000	0	0
Q9CZT5	Q9CZT5	Vasorin	Vasn	0.896101	-0.158266	0.378511	3	-0.283309	-0.314779	0.123289	105970000	87076000	3814800000	3067000000	50552000	55062000	19	19	19	28.7	28.7	28.7	72.26	0	323.31	3226200000	264	9	14	12	10	14	13	111250000	0	0
Q61696;P17879;P16627	Q61696;P17879;P16627	Heat shock 70 kDa protein 1A;Heat shock 70 kDa protein 1B;Heat shock 70 kDa protein 1-like	Hspa1a;Hspa1b;Hspa1l	1.16854	0.224709	0.378611	3	0.414509	0.435422	-0.175803	2183000	2909600	11297000	15277000	1423400	1260100	10	8	8	17	13.3	13.3	70.078	0	48.835	50502000	39	5	3	5	5	3	5	1364900	0	0
P70168	P70168	Importin subunit beta-1	Kpnb1	1.14703	0.1979	0.384087	3	0.531213	0.144346	-0.0818585	1812000	2618600	548990000	606760000	6493800	6135600	16	16	16	25.6	25.6	25.6	97.183	0	323.31	576670000	49	5	16	2	7	16	2	13106000	0	0
Q00493	Q00493	Carboxypeptidase E	Cpe	1.07012	0.0977714	0.384089	3	0.0446189	0.270434	-0.0217383	235270000	242660000	1215500000	1466100000	76363000	75221000	37	37	37	67.6	67.6	67.6	53.255	0	323.31	14333000000	597	27	27	19	25	26	22	511880000	0	0
Q91WP6;Q5I2A0;Q03734;Q6P4P1	Q91WP6	Serine protease inhibitor A3N	Serpina3n	1.3034	0.382277	0.385985	3	1.07365	-0.024429	0.0976147	3836900	8075700	301960000	296890000	8692500	9301000	25	25	23	56	56	52.4	46.717	0	323.31	2194300000	178	10	12	12	12	13	13	91430000	0	0
Q61001	Q61001	Laminin subunit alpha-5	Lama5	1.43949	0.525558	0.386795	3	-0.405007	0.795732	1.18595	3679000	2778500	7728300	13416000	192780	438600	8	8	8	3.8	3.8	3.8	404.05	0	68.353	57036000	24	5	6	2	5	6	2	316870	0	0
A2ASQ1	A2ASQ1	Agrin;Agrin N-terminal 110 kDa subunit;Agrin C-terminal 110 kDa subunit;Agrin C-terminal 90 kDa fragment;Agrin C-terminal 22 kDa fragment	Agrn	1.17818	0.236563	0.38931	3	-0.156835	0.591592	0.274933	11397000	10223000	217830000	328250000	5089600	6158100	44	44	44	32.7	32.7	32.7	207.54	0	323.31	570560000	152	20	30	17	23	30	19	5763300	0	0
P28798	P28798	Granulins;Acrogranin;Granulin-1;Granulin-2;Granulin-3;Granulin-4;Granulin-5;Granulin-6;Granulin-7	Grn	1.15322	0.205669	0.396472	3	0.492137	0.28424	-0.159369	13453000	18922000	161180000	196280000	6017200	5387900	15	15	15	33.8	33.8	33.8	63.458	0	80.494	299660000	78	8	11	6	9	11	7	12486000	0	0
Q9JII6	Q9JII6	Alcohol dehydrogenase [NADP(+)]	Akr1a1	0.795352	-0.330334	0.398666	3	0.282516	-0.551411	-0.722107	5613600	6827900	82919000	56580000	537700	325960	7	7	7	20.9	20.9	20.9	36.586	0	16.623	153260000	37	7	4	2	7	4	2	6130600	0	0
P20029	P20029	78 kDa glucose-regulated protein	Hspa5	0.775766	-0.366307	0.402019	3	0.206283	-0.312449	-0.992756	257430	297000	11150000	8978800	363530	182680	3	2	2	6.7	5	5	72.421	0	23.611	29013000	13	2	2	2	2	2	2	763500	0	0
Q8QZR4	Q8QZR4	Out at first protein homolog	Oaf	1.14428	0.194441	0.402674	3	0.168504	0.52636	-0.11154	65686000	73824000	657430000	946890000	12715000	11769000	17	17	17	53.9	53.9	53.9	31.524	0	272.21	2014000000	211	12	12	14	12	12	14	154920000	0	0
Q99NH8	Q99NH8	Triggering receptor expressed on myeloid cells 2	Trem2	1.40955	0.495236	0.405058	3	1.42112	0.20119	-0.136603	500460	1340200	10311000	11854000	2851400	2593800	5	5	5	22.5	22.5	22.5	24.527	0	181.52	116300000	32	2	2	4	2	2	5	11630000	0	0
Q04999	Q04999	Inhibin beta B chain	Inhbb	1.27787	0.35374	0.407024	3	-0.137691	0.193277	1.00563	1463300	1330100	29981000	34279000	196820	395180	7	7	7	28.2	28.2	28.2	45.21	0	105.22	100530000	24	4	5	3	4	5	3	5026400	0	0
P18760;P45591	P18760	Cofilin-1	Cfl1	0.492312	-1.02236	0.408448	3	-2.69213	-1.09377	0.718834	3436600	531760	99990000	46849000	5523100	9090200	6	6	6	44	44	44	18.559	0	75.591	99292000	56	3	5	5	2	6	5	8274300	0	0
Q9Z0L8	Q9Z0L8	Gamma-glutamyl hydrolase	Ggh	1.10921	0.149531	0.408574	3	0.383924	-0.113065	0.177732	11624000	15168000	84043000	77708000	2733700	3092100	12	12	12	33.1	33.1	33.1	35.469	0	137.87	529750000	55	10	7	4	9	6	6	26487000	0	0
Q8BWP8	Q8BWP8	Beta-1,4-glucuronyltransferase 1	B4gat1	0.813754	-0.297335	0.40907	3	0.0540622	-0.866149	-0.079919	5889900	6114800	13948000	7652000	3017300	2854700	14	14	14	41.9	41.9	41.9	47.384	0	50.593	210820000	48	6	4	7	6	3	5	9165900	0	0
Q8BRK9	Q8BRK9	Alpha-mannosidase 2x	Man2a2	1.56796	0.648885	0.411827	3	0.425686	1.83599	-0.315018	331720	445570	20263000	72342000	972680	781880	13	12	12	15	14.3	14.3	130.65	0	80.771	55257000	32	5	8	2	8	8	2	952710	0	0
P13595	P13595	Neural cell adhesion molecule 1	Ncam1	1.05321	0.0747922	0.420422	3	0.160617	-0.073306	0.137065	15412000	17227000	1213100000	1153000000	4995700	5493600	22	22	22	25.3	25.3	25.3	119.43	0	323.31	1680600000	252	11	21	7	14	21	7	31709000	0	0
P15379	P15379	CD44 antigen	Cd44	1.12338	0.167848	0.426435	3	0.0624473	0.499591	-0.0584956	3277900	3422900	104250000	147390000	1751600	1682000	4	4	4	4.5	4.5	4.5	85.616	0	9.506	231520000	46	3	2	2	3	2	2	9646600	0	0
O54782	O54782	Epididymis-specific alpha-mannosidase	Man2b2	0.931174	-0.102877	0.426579	3	0.0962743	-0.254029	-0.150877	2683700	2868900	281080000	235700000	5918600	5330900	20	20	20	21.9	21.9	21.9	115.61	0	160.98	278970000	77	6	13	9	10	13	9	5693300	0	0
Q8R464	Q8R464	Cell adhesion molecule 4	Cadm4	1.30785	0.387196	0.429288	3	0.28921	1.1132	-0.240823	1677700	2050100	4561700	9868100	1127700	954330	10	10	10	34.5	34.5	34.5	42.723	0	212.19	187420000	32	6	2	6	6	2	6	12494000	0	0
Q9QZF2	Q9QZF2	Glypican-1;Secreted glypican-1	Gpc1	1.09755	0.134293	0.429341	3	-0.125095	0.338529	0.189445	3792600	3477600	137900000	174370000	1698200	1936500	14	14	14	28.4	28.4	28.4	61.359	0	48.928	297720000	68	10	8	3	11	10	4	7834800	0	0
Q6GQT1	Q6GQT1	Alpha-2-macroglobulin-P	A2mp	0.797797	-0.325907	0.429657	3	0.142551	-0.967411	-0.15286	4313700	4761700	479740000	245350000	7762500	6982100	49	46	45	39.9	37.6	37	164.35	0	323.31	454640000	170	18	36	17	17	29	22	5477600	0	0
Q8CG14	Q8CG14	Complement C1s-A subcomponent;Complement C1s-A subcomponent heavy chain;Complement C1s-A subcomponent light chain	C1sa	1.05694	0.079887	0.429722	3	0.0786842	0.221419	-0.0604423	11025000	11643000	495720000	577950000	10797000	10354000	25	25	14	36.8	36.8	23.7	76.857	0	323.31	415460000	80	6	10	7	6	12	7	14326000	0	0
Q06335	Q06335	Amyloid-like protein 2	Aplp2	1.07879	0.109411	0.440911	3	0.295947	-0.0995811	0.131868	24362000	29909000	1133500000	1057900000	23247000	25472000	25	23	23	31.1	29.8	29.8	80.466	0	323.31	1150800000	312	15	16	11	18	16	11	33848000	0	0
Q9Z0P5	Q9Z0P5	Twinfilin-2	Twf2	0.734398	-0.445366	0.443097	3	0.426993	-0.579816	-1.18328	624280	839300	15809000	10577000	62180	27381	3	3	3	10	10	10	39.47	0	56.61	30703000	15	1	2	2	1	2	2	1395600	0	0
Q8K4G1	Q8K4G1	Latent-transforming growth factor beta-binding protein 4	Ltbp4	1.12879	0.174779	0.447907	3	0.547449	0.00705413	-0.0301657	582580	851440	89972000	90413000	755840	740200	20	19	19	13.1	12.7	12.7	178.64	0	95.78	137300000	54	4	16	2	5	18	2	1674400	0	0
Q8BJ66	Q8BJ66	Kazal-type serine protease inhibitor domain-containing protein 1	Kazald1	1.44403	0.530102	0.449963	3	-0.420919	1.54728	0.46395	556330	415550	3504700	10243000	319630	440870	8	8	8	35.8	35.8	35.8	34.271	0	14.598	36978000	13	2	3	4	2	3	5	2465200	0	0
P14106	P14106	Complement C1q subcomponent subunit B	C1qb	1.32046	0.401045	0.452732	3	1.07717	0.533524	-0.407559	2008300	4237300	8160500	11812000	1750900	1320000	4	4	4	16.6	16.6	16.6	26.717	0	32.985	55896000	24	3	3	3	3	3	2	3992600	0	0
Q9JHE3	Q9JHE3	Neutral ceramidase;Neutral ceramidase soluble form	Asah2	0.877143	-0.189116	0.454125	3	-0.0468844	-0.593723	0.0732605	2179800	2110100	194090000	128610000	1608700	1692500	9	9	9	14.2	14.2	14.2	83.508	0	61.658	109330000	49	4	8	3	6	8	3	4049400	0	0
Q60847	Q60847	Collagen alpha-1(XII) chain	Col12a1	0.933324	-0.0995495	0.455371	3	-0.276436	0.0974444	-0.119657	9947700	8213100	213090000	227980000	10085000	9282300	58	58	58	24.5	24.5	24.5	340.21	0	323.31	483240000	239	26	37	18	32	38	23	2876400	0	0
Q64727	Q64727	Vinculin	Vcl	0.808664	-0.306387	0.458501	3	-0.401935	-0.835293	0.318067	24589000	18610000	659840000	369820000	1406800	1753800	43	43	43	48.8	48.8	48.8	116.72	0	323.31	503500000	197	32	30	2	37	27	2	5854700	0	0
P50608	P50608	Fibromodulin	Fmod	0.817336	-0.290999	0.462553	3	-0.934462	-0.0161053	0.077569	154620000	80903000	452200000	447180000	8094000	8541100	14	14	14	41.5	41.5	41.5	43.054	0	323.31	7456500000	281	10	8	8	11	9	9	573580000	0	0
Q3TCN2	Q3TCN2	Putative phospholipase B-like 2;Putative phospholipase B-like 2 28 kDa form;Putative phospholipase B-like 2 40 kDa form;Putative phospholipase B-like 2 15 kDa form	Plbd2	1.24563	0.316881	0.46609	3	0.0457075	1.02045	-0.115519	5200500	5367900	7626600	15471000	370890	342350	5	5	5	7.4	7.4	7.4	66.289	0	34.522	41027000	18	3	2	3	3	2	3	1414700	0	0
Q61361	Q61361	Brevican core protein	Bcan	1.10856	0.148693	0.471745	3	-0.186666	0.352872	0.279873	9054400	7955500	787800000	1006100000	60391000	73320000	40	40	40	49.8	49.8	49.8	95.814	0	323.31	1788400000	312	14	27	24	17	25	29	39741000	0	0
O08709	O08709	Peroxiredoxin-6	Prdx6	0.734571	-0.445025	0.477076	3	0.426712	-1.34926	-0.412525	67909000	91281000	1530500000	600710000	14536000	10921000	23	23	23	82.1	82.1	82.1	24.87	0	241.49	1084300000	166	15	14	8	17	13	8	67767000	0	0
Q8VE43	Q8VE43	Meteorin-like protein	Metrnl	0.864412	-0.21021	0.489951	3	0.0841971	-0.708832	-0.00599363	3319600	3519100	9344000	5716800	470350	468400	7	7	7	28.9	28.9	28.9	34.529	0	52.255	34961000	26	5	5	3	5	4	3	2185000	0	0
P07901;REV__Q8BL66	P07901	Heat shock protein HSP 90-alpha	Hsp90aa1	1.10704	0.146712	0.493087	3	0.315605	0.330531	-0.206002	12211000	15197000	709230000	891840000	5213300	4519600	37	37	26	40.9	40.9	27.7	84.787	0	323.31	657720000	127	10	22	8	12	22	8	17308000	0	0
P06151;P00342	P06151	L-lactate dehydrogenase A chain	Ldha	1.08672	0.119979	0.49591	3	0.24096	0.28841	-0.169431	64001000	75635000	318130000	388530000	3981700	3540500	19	19	16	39.5	39.5	39.5	36.498	0	128.27	717520000	100	13	10	6	13	10	5	31196000	0	0
Q8BV57	Q8BV57	Soluble scavenger receptor cysteine-rich domain-containing protein SSC5D	Ssc5d	0.915234	-0.127788	0.496907	3	-0.436983	0.050923	0.00269657	2362600	1745200	91128000	94402000	2298400	2302700	8	8	8	10	10	10	144.63	0	89.461	139830000	65	6	7	2	6	7	2	2496900	0	0
O35103	O35103	Osteomodulin	Omd	0.880253	-0.184009	0.498491	3	-0.534106	-0.252316	0.234394	6811600	4704000	170580000	143210000	2921000	3436300	12	12	12	29.3	29.3	29.3	49.745	0	66.205	442040000	86	4	7	9	4	6	8	36837000	0	0
Q01279	Q01279	Epidermal growth factor receptor	Egfr	0.719041	-0.475855	0.499971	3	-1.61869	-0.102565	0.293691	4717000	1536000	401170000	373640000	4199800	5148000	16	16	16	13.7	13.7	13.7	134.85	0	113.06	256260000	79	6	16	5	9	14	4	3768600	0	0
Q99M71	Q99M71	Mammalian ependymin-related protein 1	Epdr1	1.30648	0.385688	0.503981	3	-0.283585	0.130546	1.3101	21748000	17867000	68801000	75317000	1572800	3899900	6	6	6	31.7	31.7	31.7	25.485	0	81.194	218700000	60	5	5	4	5	5	4	18225000	0	0
P16858;Q64467;REV__Q9Z2B5	P16858	Glyceraldehyde-3-phosphate dehydrogenase	Gapdh	0.822073	-0.282662	0.507471	3	0.245306	-0.140284	-0.953009	88430000	104820000	811790000	736570000	6436500	3324800	20	20	20	55	55	55	35.81	0	219.72	1892500000	191	14	18	8	14	17	7	90119000	0	0
Q9QUR8	Q9QUR8	Semaphorin-7A	Sema7a	0.863285	-0.212091	0.526129	3	-0.671913	-0.254995	0.290636	5661700	3553700	73088000	61247000	137020	167600	11	11	11	20.2	20.2	20.2	74.993	0	45.692	121650000	39	7	9	1	8	8	1	2588300	0	0
P21460;Q8CCP0	P21460	Cystatin-C	Cst3	1.28408	0.360737	0.528807	3	0.0128612	1.30488	-0.235528	23675000	23887000	460450000	1137600000	26682000	22663000	19	19	19	70	70	70	15.531	0	106.66	875510000	152	5	7	16	8	6	15	87551000	0	0
Q3U962	Q3U962	Collagen alpha-2(V) chain	Col5a2	0.975655	-0.0355563	0.530257	3	-0.123538	-0.0214348	0.038304	14732000	13523000	404810000	398840000	821380	843480	29	29	29	32.3	32.3	32.3	145.02	0	169.16	547560000	232	17	23	3	19	23	4	5951700	0	0
Q9Z175	Q9Z175	Lysyl oxidase homolog 3	Loxl3	0.870754	-0.199663	0.537297	3	-0.731268	0.153064	-0.0207847	282200000	169990000	1196300000	1330200000	27196000	26807000	39	39	39	45.9	45.9	45.9	83.739	0	323.31	1782500000	273	24	25	19	23	25	19	42441000	0	0
O09010	O09010	Beta-1,3-N-acetylglucosaminyltransferase lunatic fringe	Lfng	0.794698	-0.331522	0.539949	3	-0.524802	0.530666	-1.00043	4642800	3227000	27218000	39319000	737940	368860	11	11	11	45	45	45	41.952	0	28.647	83664000	28	2	5	6	3	5	6	3637600	0	0
Q91ZJ9	Q91ZJ9	Hyaluronidase-1	Hyal1	1.12079	0.164519	0.546688	3	-0.228145	0.157541	0.56416	890010	759830	3608800	4025200	446830	660650	5	5	5	18.8	18.8	18.8	52.109	0	35.695	94518000	30	3	2	2	3	3	4	5559900	0	0
P09581	P09581	Macrophage colony-stimulating factor 1 receptor	Csf1r	1.09639	0.132767	0.54783	3	0.481339	-0.149928	0.0668891	2110400	2946200	148220000	133590000	18649000	19534000	12	12	12	12.5	12.5	12.5	109.18	0	188.07	234230000	55	2	7	7	4	8	8	6330500	0	0
Q9R1P4	Q9R1P4	Proteasome subunit alpha type-1	Psma1	1.1743	0.231802	0.555092	3	-0.426324	0.6025	0.51923	11190000	8327100	115560000	175460000	1231100	1764400	10	10	10	41.4	41.4	41.4	29.546	0	39.194	202570000	46	6	7	6	6	6	6	11254000	0	0
P16301	P16301	Phosphatidylcholine-sterol acyltransferase	Lcat	1.09446	0.130223	0.557104	3	-0.203316	0.152758	0.441227	12271000	10658000	435840000	484520000	37215000	50529000	6	6	6	14.6	14.6	14.6	49.746	0	184.76	2491100000	122	3	4	5	3	4	5	95810000	0	0
P68254	P68254	14-3-3 protein theta	Ywhaq	0.862017	-0.214213	0.557627	3	0.109785	0.0756339	-0.828056	13811000	14903000	145660000	153500000	730870	411690	16	12	12	61.6	58	58	27.778	0	187.13	164240000	43	10	5	3	10	5	2	9124600	0	0
O70370	O70370	Cathepsin S	Ctss	1.40263	0.488139	0.557936	3	1.73266	-0.690838	0.422599	630320	2094800	2252000	1395100	182200	244210	5	5	5	21.2	21.2	21.2	38.474	0	59.662	21897000	12	2	2	2	4	2	2	1216500	0	0
Q8VHI5	Q8VHI5	Vitrin	Vit	0.859961	-0.217657	0.559245	3	-0.836141	0.00302321	0.180148	2431000	1361700	94388000	94586000	5776700	6545000	15	15	15	29.7	29.7	29.7	70.698	0	323.31	143840000	63	4	10	7	7	11	9	3596100	0	0
Q9CQV8	Q9CQV8	14-3-3 protein beta/alpha;14-3-3 protein beta/alpha, N-terminally processed	Ywhab	1.07842	0.108917	0.55954	3	0.196542	0.326194	-0.195986	6645500	7615400	72270000	90605000	93085	81261	16	8	8	58.1	39.8	39.8	28.086	0	102.94	70407000	27	5	4	2	6	4	2	4141600	0	0
Q7TMJ8	Q7TMJ8	Phosphoinositide-3-kinase-interacting protein 1	Pik3ip1	1.13069	0.177199	0.563354	3	-0.21108	0.666064	0.0766131	11645000	10060000	39239000	62262000	550060	580060	6	6	6	24.6	24.6	24.6	28.567	0	69.753	78510000	33	5	3	2	5	3	2	8723300	0	0
Q64299	Q64299	Protein NOV homolog	Nov	1.14359	0.193575	0.566387	3	-0.157929	0.756713	-0.018059	34478000	30903000	37527000	63407000	4132000	4080600	9	9	9	30.5	30.5	30.5	38.928	0	182.46	1136300000	90	8	5	6	7	6	6	54109000	0	0
P35700	P35700	Peroxiredoxin-1	Prdx1	0.780603	-0.357339	0.57197	3	0.392765	-0.0751824	-1.3896	8264100	10850000	199890000	189740000	372730	142260	12	12	11	45.2	45.2	45.2	22.176	0	35.68	169910000	60	4	8	4	8	8	3	11327000	0	0
Q810U4	Q810U4	Neuronal cell adhesion molecule	Nrcam	0.890474	-0.167355	0.573807	3	-0.669708	0.0869809	0.0806616	2972000	1868300	315230000	334820000	3055500	3231200	21	21	21	25.2	25.2	25.2	138.52	0	307.15	302220000	106	12	16	6	16	17	8	4722100	0	0
Q8BPB5	Q8BPB5	EGF-containing fibulin-like extracellular matrix protein 1	Efemp1	1.11427	0.156104	0.583744	3	-0.321991	0.449692	0.340611	11499000	9198800	1807800000	2469000000	7979200	10104000	26	26	26	56.8	56.8	56.8	54.952	0	323.31	3277800000	317	11	20	16	11	21	15	121400000	0	0
Q8CG19	Q8CG19	Latent-transforming growth factor beta-binding protein 1	Ltbp1	0.855598	-0.224995	0.58503	3	-0.490908	0.466529	-0.650606	5970400	4248400	164990000	227980000	5699100	3630400	24	24	24	17.6	17.6	17.6	186.72	0	323.31	336680000	102	13	16	6	14	15	6	3825900	0	0
Q9R1V6	Q9R1V6	Disintegrin and metalloproteinase domain-containing protein 22	Adam22	0.818779	-0.288454	0.585221	3	-0.953675	0.562577	-0.474265	11063000	5712000	43927000	64876000	1044200	751650	5	5	5	6	6	6	99.714	0	293.61	90359000	36	4	3	2	4	3	1	1844100	0	0
P58022	P58022	Lysyl oxidase homolog 2	Loxl2	1.06857	0.0956784	0.591498	3	0.106865	-0.171566	0.351736	64160000	69093000	1018000000	903860000	9738300	12427000	32	32	32	35.2	35.2	35.2	87.002	0	323.31	814520000	152	21	25	10	21	26	10	21435000	0	0
P39061	P39061	Collagen alpha-1(XVIII) chain;Endostatin	Col18a1	1.13988	0.188877	0.597827	3	0.659487	0.287079	-0.379935	2369200	3742200	105420000	128630000	1255400	964740	8	8	8	6.7	6.7	6.7	182.17	0	155.92	113750000	55	3	7	3	4	7	3	1404300	0	0
Q61554	Q61554	Fibrillin-1	Fbn1	0.910083	-0.13593	0.5983	3	-0.534818	0.220704	-0.0936753	41520000	28659000	649840000	757260000	1088000	1019600	58	58	57	25.9	25.9	25.4	312.26	0	323.31	1213000000	244	18	52	4	22	50	8	7533900	0	0
O35664	O35664	Interferon alpha/beta receptor 2	Ifnar2	1.11351	0.155112	0.615217	3	0.629704	-0.278997	0.114628	1231800	1905900	13069000	10771000	1111300	1203200	3	3	3	6.2	6.2	6.2	56.578	0	64.557	154240000	28	3	2	2	3	3	2	6706000	0	0
Q07079	Q07079	Insulin-like growth factor-binding protein 5	Igfbp5	1.03319	0.0470995	0.618861	3	0.0914065	0.159506	-0.109614	191260000	203770000	1783500000	1992000000	82923000	76856000	20	20	20	49.8	49.8	49.8	30.372	0	323.31	4799400000	348	11	14	19	11	14	18	342820000	0	0
O08999	O08999	Latent-transforming growth factor beta-binding protein 2	Ltbp2	1.06969	0.0971927	0.63575	3	0.406426	-0.202022	0.087174	37262000	49387000	653790000	568360000	10580000	11239000	41	41	40	23.4	23.4	23.1	195.83	0	323.31	1425600000	240	26	26	12	27	27	14	19800000	0	0
O35988	O35988	Syndecan-4	Sdc4	0.858395	-0.220287	0.645578	3	-0.404358	0.565482	-0.821986	24854000	18779000	189630000	280630000	2566900	1452000	4	4	4	27.8	27.8	27.8	21.482	0	26.031	524590000	44	3	3	1	4	3	1	52459000	0	0
P97798	P97798	Neogenin	Neo1	1.10586	0.145169	0.64653	3	-0.211063	0.678561	-0.0319901	2566500	2217200	361240000	578180000	2188800	2140800	30	30	30	26.1	26.1	26.1	163.16	0	248.97	492320000	136	14	25	5	17	26	6	6837800	0	0
P15116	P15116	Cadherin-2	Cdh2	0.94556	-0.0807597	0.646558	3	-0.363331	-0.0324628	0.153515	64775000	50354000	1586500000	1551200000	6973900	7756900	26	26	26	35.8	35.8	35.8	99.795	0	323.31	1178700000	130	11	16	9	12	16	8	28748000	0	0
P51655	P51655	Glypican-4;Secreted glypican-4	Gpc4	1.07258	0.10108	0.650838	3	-0.0814067	0.484571	-0.0999232	93722000	88580000	534760000	748220000	32981000	30774000	26	26	24	53.1	53.1	50.1	62.586	0	323.31	1582800000	195	16	18	11	18	19	11	42779000	0	0
Q8BM88	Q8BM88	Cathepsin O	Ctso	1.01622	0.0232164	0.653192	3	0.108833	0.000801126	-0.0399852	3350100	3612600	48609000	48636000	707150	687820	10	10	10	33.7	33.7	33.7	34.723	0	27.702	166870000	28	5	9	4	5	9	4	8343400	0	0
Q08890	Q08890	Iduronate 2-sulfatase	Ids	1.08255	0.114436	0.657388	3	0.426494	0.23166	-0.314845	1404800	1888000	166030000	194950000	4764800	3830600	13	13	13	24.8	24.8	24.8	62.185	0	98.051	278670000	70	4	8	10	4	8	10	10321000	0	0
P54763	P54763	Ephrin type-B receptor 2	Ephb2	1.09959	0.136961	0.663639	3	-0.291318	0.0630124	0.639188	527880	431360	23855000	24920000	708850	1104000	8	8	8	11.5	11.5	11.5	109.9	0	323.31	61079000	27	2	7	4	2	6	4	1131100	0	0
Q925I7	Q925I7	Platelet-derived growth factor D;Platelet-derived growth factor D, latent form;Platelet-derived growth factor D, receptor-binding form	Pdgfd	1.07944	0.110283	0.674956	3	0.215855	-0.324694	0.439689	6834300	7937300	24274000	19382000	386880	524730	7	7	7	25.4	25.4	25.4	42.809	0	147.76	105030000	26	5	5	3	5	4	3	5001500	0	0
Q04519	Q04519	Sphingomyelin phosphodiesterase	Smpd1	0.926537	-0.110079	0.675403	3	-0.321214	-0.352219	0.343194	1135400	908770	31742000	24866000	1076100	1365100	5	5	5	7.5	7.5	7.5	69.926	0	20.307	65578000	33	3	3	3	3	3	3	1928800	0	0
Q60648	Q60648	Ganglioside GM2 activator	Gm2a	1.14968	0.201235	0.687719	3	0.400462	0.831262	-0.628019	33576000	44318000	218700000	389120000	2062700	1334700	9	9	9	44.6	44.6	44.6	20.824	0	59.798	354740000	44	6	5	4	6	5	4	35474000	0	0
P98063;Q9WVM6	P98063	Bone morphogenetic protein 1	Bmp1	1.06813	0.0950885	0.692314	3	-0.288413	0.426103	0.147575	12174000	9968100	591270000	794430000	6079500	6734300	37	37	33	32.2	32.2	28.5	111.67	0	183.41	593540000	165	19	31	10	20	32	9	9730200	0	0
P22777	P22777	Plasminogen activator inhibitor 1	Serpine1	1.07624	0.105998	0.692444	3	0.0881233	-0.286411	0.516281	268470000	285380000	399810000	327820000	4085400	5843200	34	34	34	75.1	75.1	75.1	45.17	0	323.31	3952400000	224	28	22	15	27	22	16	146390000	0	0
Q811B1	Q811B1	Xylosyltransferase 1	Xylt1	0.874454	-0.193546	0.692559	3	-0.306359	0.590008	-0.864286	2251200	1820500	37300000	56146000	976720	536530	11	11	11	12.5	12.5	12.5	107.3	0	123.51	102990000	43	6	9	3	7	9	4	1745600	0	0
P07141	P07141	Macrophage colony-stimulating factor 1;Processed macrophage colony-stimulating factor 1	Csf1	1.08553	0.118395	0.699555	3	-0.00454512	-0.267984	0.627714	75982000	75743000	914460000	759440000	20603000	31834000	14	14	14	25.2	25.2	25.2	60.648	0	323.31	2989500000	403	12	12	8	13	11	8	103090000	0	0
P47877	P47877	Insulin-like growth factor-binding protein 2	Igfbp2	0.939734	-0.089676	0.708843	3	-0.441775	0.279382	-0.106636	418430000	308060000	1298700000	1576200000	43650000	40540000	29	29	29	80.3	80.3	80.3	32.846	0	323.31	4829300000	335	19	19	23	19	19	22	268290000	0	0
O70362	O70362	Phosphatidylinositol-glycan-specific phospholipase D	Gpld1	0.894635	-0.160628	0.709741	3	0.547342	-0.30306	-0.726167	2077200	3035600	65346000	52965000	1493000	902530	11	11	11	17.4	17.4	17.4	93.254	0	31.901	47812000	28	4	8	3	4	9	4	1017300	0	0
Q80V53	Q80V53	Carbohydrate sulfotransferase 14	Chst14	0.859111	-0.219083	0.714116	3	-0.240398	0.690781	-1.10763	22132000	18735000	28947000	46725000	196410	91145	9	9	9	31.1	31.1	31.1	43.144	0	101.37	324970000	52	8	8	2	8	9	3	14771000	0	0
Q61207	Q61207	Prosaposin	Psap	1.01762	0.0252023	0.731348	3	-0.0723368	0.00247066	0.145473	68052000	64724000	921820000	923400000	36270000	40118000	32	32	32	50.1	50.1	50.1	61.422	0	323.31	3983000000	348	17	19	24	17	19	25	110640000	0	0
P09055	P09055	Integrin beta-1	Itgb1	0.906832	-0.141093	0.739137	3	-0.819858	0.450098	-0.0535181	12235000	6931100	310980000	424840000	818590	788780	25	25	25	33.2	33.2	33.2	88.231	0	244.27	405430000	139	20	18	3	22	20	3	10396000	0	0
P09411;P09041	P09411	Phosphoglycerate kinase 1	Pgk1	0.973502	-0.0387444	0.74185	3	0.165579	-0.125886	-0.155926	8429800	9455000	203090000	186120000	878040	788090	14	14	14	45.1	45.1	45.1	44.55	0	154.06	536190000	65	8	11	3	8	12	2	17297000	0	0
Q7TQ62	Q7TQ62	Podocan	Podn	0.933193	-0.0997523	0.744419	3	-0.631638	0.128861	0.20352	17512000	11303000	937600000	1025200000	8788500	10120000	28	28	28	39	39	39	68.717	0	294.85	759080000	143	12	23	12	13	25	13	21086000	0	0
P09528	P09528	Ferritin heavy chain;Ferritin heavy chain, N-terminally processed	Fth1	0.925051	-0.112396	0.750458	3	-0.510861	-0.320924	0.494599	8677500	6089900	405930000	324970000	20204000	28466000	6	6	6	35.2	35.2	35.2	21.066	0	13.74	499430000	58	2	6	3	2	5	3	41619000	0	0
P26039	P26039	Talin-1	Tln1	0.973862	-0.0382109	0.756488	3	0.120593	0.00820248	-0.243429	45124000	49058000	827820000	832540000	11074000	9354600	102	102	94	50.8	50.8	49	269.82	0	323.31	1501800000	666	52	63	28	61	60	28	9815900	0	0
Q9R0E1	Q9R0E1	Procollagen-lysine,2-oxoglutarate 5-dioxygenase 3	Plod3	0.931157	-0.102903	0.760595	3	-0.669379	0.0368954	0.323774	11238000	7066200	574820000	589710000	5232100	6548500	20	19	19	32.8	31.4	31.4	84.921	0	323.31	422790000	99	8	16	8	8	18	8	10066000	0	0
Q62165	Q62165	Dystroglycan;Alpha-dystroglycan;Beta-dystroglycan	Dag1	1.04478	0.0631937	0.760953	3	0.234529	0.254691	-0.299638	136810000	160960000	1080900000	1289600000	10549000	8570600	31	31	31	28.9	28.9	28.9	96.904	0	323.31	3685900000	335	17	21	22	19	21	23	83771000	0	0
P17751	P17751	Triosephosphate isomerase	Tpi1	0.9251	-0.112319	0.763535	3	0.500657	-0.224644	-0.612971	41407000	58585000	419990000	359430000	702670	459440	17	17	17	62.2	62.2	62.2	32.191	0	139.37	420430000	110	14	13	3	13	12	3	22128000	0	0
Q61581	Q61581	Insulin-like growth factor-binding protein 7	Igfbp7	0.944706	-0.0820623	0.764091	3	-0.200217	0.378181	-0.424151	72187000	62833000	476740000	619620000	8093500	6031900	20	20	20	73.7	73.7	73.7	28.969	0	231.42	1165700000	143	12	13	12	12	13	11	68572000	0	0
Q6PE55	Q6PE55	Platelet-derived growth factor receptor-like protein	Pdgfrl	0.951713	-0.0714012	0.769426	3	-0.34494	-0.217609	0.348345	4738100	3730500	35683000	30687000	646980	823670	11	11	11	34.9	34.9	34.9	41.927	0	93.549	147580000	43	5	6	6	5	6	5	6708400	0	0
O09159	O09159	Lysosomal alpha-mannosidase	Man2b1	1.06284	0.087922	0.777929	3	0.633125	-0.209105	-0.160255	13138000	20376000	2067800000	1788800000	62597000	56016000	47	47	47	45.1	45.1	45.1	114.65	0	323.31	2289300000	322	22	31	25	33	31	25	46720000	0	0
P18242	P18242	Cathepsin D	Ctsd	1.08032	0.111458	0.787695	3	0.681764	-0.562091	0.214702	35077000	56267000	82292000	55738000	5113300	5933800	23	23	23	50.2	50.2	50.2	44.953	0	323.31	1100000000	117	21	8	11	21	7	11	55002000	0	0
Q11136	Q11136	Xaa-Pro dipeptidase	Pepd	1.08945	0.123595	0.792981	3	0.948086	-0.332239	-0.245063	2192700	4230400	21274000	16898000	2895900	2443500	7	7	7	15	15	15	55.028	0	53.834	292610000	35	4	3	5	4	3	6	10450000	0	0
Q6GU68	Q6GU68	Immunoglobulin superfamily containing leucine-rich repeat protein	Islr	0.924641	-0.113035	0.793753	3	0.63472	-0.596588	-0.377236	11570000	17964000	37129000	24554000	1888400	1453900	7	7	7	25.5	25.5	25.5	45.614	0	16.971	802610000	46	7	3	3	5	3	2	42243000	0	0
P32261	P32261	Antithrombin-III	Serpinc1	1.01572	0.0225007	0.79678	3	0.130058	0.0633416	-0.125897	33094000	36216000	814560000	851120000	20774000	19038000	14	6	6	27.1	19.1	19.1	52.003	0	84.173	3135400000	173	4	5	5	4	5	5	97982000	0	0
P47878	P47878	Insulin-like growth factor-binding protein 3	Igfbp3	1.01706	0.0244076	0.802443	3	0.0774475	0.138927	-0.143152	247690000	261350000	1666900000	1835400000	91159000	82548000	27	27	27	56.8	56.8	56.8	31.687	0	323.31	9897400000	421	19	21	23	17	21	24	520910000	0	0
Q9JME2	Q9JME2	Carbohydrate sulfotransferase 11	Chst11	1.04305	0.0608131	0.804836	3	-0.298482	0.448485	0.0324367	665890	541440	13025000	17774000	737090	753850	9	9	9	27.8	27.8	27.8	41.632	0	23.108	142440000	21	3	6	2	2	6	3	6782900	0	0
Q61171	Q61171	Peroxiredoxin-2	Prdx2	1.04594	0.0647968	0.806638	3	-0.0885438	0.521614	-0.23868	2553400	2401400	86670000	124420000	871200	738360	8	8	8	36.9	36.9	36.9	21.778	0	25.64	138990000	38	5	6	2	6	7	2	10691000	0	0
Q07235	Q07235	Glia-derived nexin	Serpine2	1.02692	0.0383226	0.814481	3	-0.22227	0.0643472	0.272891	58837000	50436000	552490000	577690000	10503000	12690000	25	25	25	58.9	58.9	58.9	44.207	0	323.31	2183100000	202	15	20	18	15	19	17	103960000	0	0
E9Q557	E9Q557	Desmoplakin	Dsp	1.12019	0.163742	0.82798	3	1.42993	-0.810643	-0.128057	1106100	2980200	106420000	60673000	239000	218700	28	28	28	10.5	10.5	10.5	332.91	0	225.84	103200000	78	8	19	3	8	19	10	500960	0	0
Q9EP52	Q9EP52	Twisted gastrulation protein homolog 1	Twsg1	0.804734	-0.313416	0.829651	3	-2.63264	1.79283	-0.100435	14526000	2342300	37868000	131210000	543060	506540	2	2	2	10.8	10.8	10.8	24.8	0	26.293	118950000	20	1	2	2	2	2	2	10814000	0	0
Q8R422	Q8R422	CD109 antigen	Cd109	1.01864	0.0266485	0.830412	3	-0.074904	0.245467	-0.0906174	10594000	10058000	700790000	830770000	4669900	4385600	35	35	35	26.5	26.5	26.5	161.66	0	323.31	873900000	283	18	30	7	21	28	10	11971000	0	0
P10852	P10852	4F2 cell-surface antigen heavy chain	Slc3a2	0.979569	-0.0297807	0.838221	3	-0.202769	-0.107773	0.2212	11951000	10384000	92942000	86252000	4529200	5279700	18	18	18	34.6	34.6	34.6	58.336	0	110.74	383920000	97	13	9	10	14	9	10	12384000	0	0
P06797	P06797	Cathepsin L1;Cathepsin L1 heavy chain;Cathepsin L1 light chain	Ctsl	1.04495	0.063428	0.853674	3	0.20752	0.501518	-0.518754	6859000	7920100	18405000	26056000	991240	691860	11	11	11	33.2	33.2	33.2	37.547	0	48.601	149810000	32	3	5	6	5	7	7	12484000	0	0
O08992	O08992	Syntenin-1	Sdcbp	1.04138	0.0584933	0.855418	3	-0.330674	0.609159	-0.103005	23536000	18715000	85376000	130230000	223920	208490	10	10	10	40.1	40.1	40.1	32.379	0	117.87	177380000	61	6	8	3	6	8	2	11825000	0	0
Q61147	Q61147	Ceruloplasmin	Cp	1.02394	0.0341282	0.859296	3	0.368489	-0.0815454	-0.184559	57244000	73902000	4969500000	4696400000	107360000	94468000	72	72	68	60.1	60.1	58.7	121.15	0	323.31	5359600000	625	39	52	39	49	56	39	97447000	0	0
Q3UHN9	Q3UHN9	Bifunctional heparan sulfate N-deacetylase/N-sulfotransferase 1;Heparan sulfate N-deacetylase 1;Heparan sulfate N-sulfotransferase 1	Ndst1	0.968368	-0.046372	0.870934	3	0.0592227	0.327496	-0.525835	5927800	6176200	128790000	161610000	495150	343910	16	16	15	23.6	23.6	22.2	100.72	0	58.278	105340000	58	8	13	2	9	12	2	2106900	0	0
Q02257;Q02248	Q02257	Junction plakoglobin	Jup	0.935356	-0.0964132	0.872481	3	0.955968	-0.736135	-0.509072	2006000	3891400	260600000	156450000	1432100	1006300	23	23	23	43.4	43.4	43.4	81.8	0	282.03	244430000	152	11	19	9	10	17	14	5200700	0	0
Q8BTM8	Q8BTM8	Filamin-A	Flna	0.975158	-0.0362916	0.890323	3	0.0993791	0.281175	-0.489429	29490000	31593000	1057700000	1285300000	3617400	2576700	77	77	72	39.1	39.1	37.7	281.22	0	323.31	1604400000	499	43	57	12	47	63	17	10696000	0	0
Q08761	Q08761	Vitamin K-dependent protein S	Pros1	1.02954	0.0420051	0.893006	3	-0.443803	0.057885	0.511933	60939000	44802000	1785600000	1858700000	16518000	23554000	30	30	28	36	36	33.6	74.934	0	323.31	2796300000	228	13	19	17	13	20	19	68203000	0	0
Q80XD1	Q80XD1	Beta-chimaerin	Chn2	0.877369	-0.188744	0.896017	3	1.3383	-2.72421	0.819679	10007000	25303000	201200000	30448000	1761800	3109600	1	1	1	5.4	5.4	5.4	38.218	0.0037843	2.6961	264850000	28	1	1	1	1	1	1	11515000	0	0
P08226	P08226	Apolipoprotein E	Apoe	1.01007	0.0144583	0.898918	3	0.0312937	0.179714	-0.167633	515320000	526620000	3977100000	4504700000	183960000	163780000	44	44	44	69.5	69.5	69.5	35.866	0	323.31	13239000000	475	21	34	33	22	34	32	735490000	0	0
Q60963	Q60963	Platelet-activating factor acetylhydrolase	Pla2g7	1.03815	0.0540201	0.90481	3	0.833612	-0.184503	-0.487048	5449400	9711600	574770000	505770000	86194000	61498000	26	26	26	53.2	53.2	53.2	49.258	0	221.63	4911300000	235	10	17	16	10	18	14	196450000	0	0
Q61245	Q61245	Collagen alpha-1(XI) chain	Col11a1	0.989371	-0.0154162	0.909765	3	0.189434	-0.00851397	-0.227169	117520000	134010000	4843600000	4815100000	50422000	43076000	32	32	29	20.1	20.1	17.7	181.03	0	323.31	4169200000	402	20	26	13	21	25	14	41692000	0	0
O35490;Q91WS4	O35490	Betaine--homocysteine S-methyltransferase 1	Bhmt	0.988663	-0.0164498	0.911978	3	0.2035	-0.00113018	-0.251719	11288000	12998000	79175000	79113000	941320	790610	15	15	15	41	41	41	45.02	0	94.817	329470000	49	7	11	5	7	12	5	13179000	0	0
Q9DBV4	Q9DBV4	Matrix-remodeling-associated protein 8	Mxra8	0.975316	-0.036058	0.918993	3	0.591267	-0.339675	-0.359766	11341000	17086000	28096000	22202000	707810	551590	8	8	8	19.5	19.5	19.5	49.75	0	33.303	221830000	45	8	5	3	8	5	3	8531800	0	0
Q80YX1	Q80YX1	Tenascin	Tnc	1.02241	0.0319687	0.919268	3	-0.5259	0.326944	0.294863	31875000	22138000	716130000	898280000	6811800	8356500	67	67	67	36	36	36	231.8	0	323.31	1488000000	303	31	50	14	41	47	21	13907000	0	0
P21956	P21956	Lactadherin	Mfge8	1.01533	0.0219519	0.919555	3	-0.268061	0.3858	-0.0518833	117300000	97410000	1277300000	1668900000	15457000	14911000	25	25	25	52.7	52.7	52.7	51.24	0	323.31	4197900000	454	19	17	16	19	18	17	182520000	0	0
Q9WUU7	Q9WUU7	Cathepsin Z	Ctsz	1.02807	0.0399316	0.923417	3	-0.273483	0.772612	-0.379335	9079800	7511900	30884000	52761000	4313000	3315800	12	12	12	43.8	43.8	43.8	33.996	0	56.6	304450000	67	9	5	8	8	5	8	21747000	0	0
P05213;P68373;P68369;P05214;Q9JJZ2	P05213;P68373;P68369;P05214	Tubulin alpha-1B chain;Tubulin alpha-1C chain;Tubulin alpha-1A chain;Tubulin alpha-3 chain	Tuba1b;Tuba1c;Tuba1a;Tuba3a	1.02024	0.0289036	0.925296	3	0.341697	0.259695	-0.514681	4464800	5658000	65164000	78016000	2109300	1476400	11	11	5	33	33	13.1	50.151	0	161.23	131130000	60	4	4	3	4	3	3	5701500	0	0
P35441	P35441	Thrombospondin-1	Thbs1	1.01491	0.021349	0.933073	3	-0.153141	-0.250729	0.467917	18181000	16350000	284840000	239400000	3547800	4907000	52	52	28	36.2	36.2	22.7	129.65	0	323.31	428110000	127	16	14	9	19	13	14	6204500	0	0
Q05793	Q05793	Basement membrane-specific heparan sulfate proteoglycan core protein;Endorepellin;LG3 peptide	Hspg2	1.01291	0.0185089	0.935933	3	-0.389002	0.210814	0.233715	28793000	21988000	248060000	287090000	5853000	6882300	79	79	79	30.5	30.5	30.5	398.29	0	323.31	621160000	274	36	54	19	42	54	29	3834300	0	0
Q9R1B9;Q80TR4	Q9R1B9	Slit homolog 2 protein;Slit homolog 2 protein N-product;Slit homolog 2 protein C-product	Slit2	0.980427	-0.0285181	0.936259	3	-0.0684095	0.537176	-0.554321	14273000	13612000	170040000	246750000	1335800	909650	42	42	42	32.9	32.9	32.9	168.78	0	323.31	399040000	149	28	27	2	30	29	3	5182300	0	0
P97326	P97326	Cadherin-6	Cdh6	0.985988	-0.020358	0.940901	3	0.0592137	0.355331	-0.475619	4417900	4603000	102120000	130640000	852010	612730	11	11	11	15.7	15.7	15.7	88.354	0	56.309	97073000	54	8	11	2	8	11	3	2426800	0	0
P54818	P54818	Galactocerebrosidase	Galc	1.00789	0.0113432	0.945286	3	-0.187373	-0.0754788	0.296881	1197900	1052000	182450000	173150000	1536200	1887200	16	16	16	30.1	30.1	30.1	77.256	0	207.13	208810000	41	3	10	7	3	9	8	6327500	0	0
P97447	P97447	Four and a half LIM domains protein 1	Fhl1	1.01114	0.0159805	0.946813	3	-0.396855	0.137522	0.307275	5098800	3872600	36335000	39969000	425920	527020	9	9	9	39.6	39.6	39.6	31.888	0	42.394	62282000	30	5	8	3	5	7	2	3663700	0	0
P05064	P05064	Fructose-bisphosphate aldolase A	Aldoa	1.00604	0.00868948	0.951547	3	0.247894	-0.0386885	-0.183137	72496000	86087000	301960000	293970000	4413900	3887700	24	24	22	61	61	51.4	39.355	0	189.67	1328300000	155	19	16	6	19	14	5	55344000	0	0
O35188	O35188	Fractalkine;Processed fractalkine	Cx3cl1	0.990675	-0.0135163	0.959579	3	-0.3009	-0.194648	0.454999	65980000	53559000	999890000	873690000	7710200	10569000	10	10	10	17.7	17.7	17.7	42.098	0	107.39	2282100000	142	6	6	9	6	7	9	126780000	0	0
P97290	P97290	Plasma protease C1 inhibitor	Serping1	0.996382	-0.00522944	0.96078	3	-0.171816	0.154309	0.00181882	56201000	49891000	7239000000	8056200000	134760000	134930000	33	33	32	49.8	49.8	49.8	55.584	0	323.31	6066000000	360	13	29	16	14	28	16	233310000	0	0
P47867	P47867	Secretogranin-3	Scg3	1.00987	0.0141712	0.965598	3	0.538817	-0.0295458	-0.466757	4779800	6944000	134180000	131460000	2922100	2114400	10	10	10	27.4	27.4	27.4	53.326	0	146.11	538560000	90	5	7	5	6	7	6	17373000	0	0
Q9DBJ1	Q9DBJ1	Phosphoglycerate mutase 1	Pgam1	1.014	0.0200583	0.970958	3	-0.191434	-0.699662	0.951271	19563000	17132000	39169000	24117000	2869400	5548200	19	19	14	80.3	80.3	68.5	28.832	0	129.82	123340000	70	11	3	5	11	3	5	8222600	0	0
Q9Z0G4	Q9Z0G4	WNT1-inducible-signaling pathway protein 2	Wisp2	0.992835	-0.0103748	0.974147	3	-0.301413	0.556885	-0.286597	2470000	2004300	7217100	10617000	7237200	5933300	8	8	8	44.6	44.6	44.6	27.095	0	38.006	100920000	41	2	4	7	2	4	7	10092000	0	0
P08122	P08122	Collagen alpha-2(IV) chain;Canstatin	Col4a2	1.00266	0.00383797	0.991114	3	0.587692	-0.443535	-0.132643	3995900	6005200	696870000	512430000	1351300	1232600	26	26	26	22.7	22.7	22.7	167.32	0	155.39	824120000	160	12	24	3	12	20	3	8767200	0	0
P97467	P97467	Peptidyl-glycine alpha-amidating monooxygenase;Peptidylglycine alpha-hydroxylating monooxygenase;Peptidyl-alpha-hydroxyglycine alpha-amidating lyase	Pam	0.999317	-0.000986132	0.99671	3	-0.406902	0.096206	0.307738	25700000	19384000	448240000	479150000	5872600	7268900	27	27	27	31.8	31.8	31.8	108.96	0	106.68	419420000	145	13	22	10	14	21	10	7489700	0	0
Q8CG85	Q8CG85	MAM domain-containing protein 2	Mamdc2	0.999084	-0.00132183	0.996741	3	0.00463889	0.492415	-0.50102	3167100	3177300	64725000	91055000	2288400	1617000	15	15	15	24.3	24.3	24.3	77.323	0	55.948	125670000	47	10	10	5	8	10	7	3927100	0	0
Q61206	Q61206	Platelet-activating factor acetylhydrolase IB subunit beta	Pafah1b2	1.44113	0.527205	NaN	2	0.530538	0.523871	NaN	3750100	5416900	20292000	29176000	NaN	34998	4	4	4	20.1	20.1	20.1	25.581	0	47.964	38658000	15	2	4	1	2	4	1	4295400	0	0
A2A8L5	A2A8L5	Receptor-type tyrosine-protein phosphatase F	Ptprf	2.18526	1.12781	NaN	2	1.10964	1.14597	NaN	395640	853760	15788000	34938000	NaN	NaN	14	14	14	13.4	13.4	13.4	211.49	0	85.138	31236000	23	5	8	0	8	9	0	281410	0	0
P15209	P15209	BDNF/NT-3 growth factors receptor	Ntrk2	1.29456	0.372459	NaN	2	NaN	0.379821	0.365097	NaN	133860	21522000	28004000	919510	1184300	6	6	6	10.8	10.8	10.8	92.132	0	28.268	41626000	22	1	4	3	1	4	4	991100	0	0
Q9WVH9	Q9WVH9	Fibulin-5	Fbln5	1.8878	0.916706	NaN	2	0.898216	0.935196	NaN	985910	1837500	42527000	81318000	NaN	NaN	8	8	8	23.7	23.7	23.7	50.193	0	200.68	185250000	30	4	8	0	5	8	0	9262700	0	0
Q8CAY6	Q8CAY6	Acetyl-CoA acetyltransferase, cytosolic	Acat2	1.79865	0.846911	NaN	2	0.823498	0.870324	NaN	552520	977790	2497000	4564700	NaN	NaN	3	3	3	6.8	6.8	6.8	41.297	0	5.0711	14967000	8	2	1	0	3	1	0	748350	0	0
Q61072	Q61072	Disintegrin and metalloproteinase domain-containing protein 9	Adam9	0.295323	-1.75963	NaN	2	-1.69912	-1.82015	NaN	3549000	1093000	25767000	7297000	NaN	NaN	1	1	1	2.2	2.2	2.2	92.079	0	42.219	17627000	13	1	1	0	1	1	0	338990	0	0
Q9R1P1	Q9R1P1	Proteasome subunit beta type-3	Psmb3	0.808425	-0.306814	NaN	2	-0.325526	-0.288103	NaN	4958600	3957000	32753000	26824000	NaN	44108	8	8	8	42.9	42.9	42.9	22.965	0	150.03	46828000	25	4	5	0	7	5	1	5203200	0	0
P08121	P08121	Collagen alpha-1(III) chain	Col3a1	0.796857	-0.327608	NaN	2	-0.306458	-0.348758	NaN	1493400	1207600	344370000	270420000	NaN	263890	21	21	15	27.2	27.2	23	138.94	0	186.02	356130000	77	4	13	0	4	15	1	4451600	0	0
P13020	P13020	Gelsolin	Gsn	1.04536	0.0640008	NaN	2	0.0593603	0.0686412	NaN	683750	712470	29531000	30970000	NaN	256750	26	5	5	30.6	7.9	7.9	85.941	0	20.976	22700000	10	2	3	1	2	3	1	613510	0	0
Q9ES30	Q9ES30	Complement C1q tumor necrosis factor-related protein 3	C1qtnf3	1.49832	0.583347	NaN	2	0.538799	0.627894	NaN	3319400	4822300	47762000	73807000	NaN	NaN	4	4	4	17.5	17.5	17.5	26.828	0	10.984	53112000	19	2	3	0	3	3	0	5901300	0	0
Q8R5M8	Q8R5M8	Cell adhesion molecule 1	Cadm1	1.14356	0.193538	NaN	2	NaN	0.174151	0.212926	NaN	4995300	196570000	221790000	1203500	1394900	6	6	6	19.5	19.5	19.5	49.788	0	17.907	161850000	36	1	5	2	2	4	2	7356900	0	0
P24369	P24369	Peptidyl-prolyl cis-trans isomerase B	Ppib	0.752515	-0.410209	NaN	2	-0.451656	-0.368761	NaN	941380	688340	6208300	4808000	NaN	NaN	2	2	2	12	12	12	23.713	0	6.0467	7535100	9	2	2	0	2	2	0	502340	0	0
Q3UV17	Q3UV17	Keratin, type II cytoskeletal 2 oral	Krt76	0.509689	-0.97231	NaN	2	NaN	-0.867474	-1.07715	NaN	51374000	3161800000	1733000000	6433800	3049400	19	3	3	17.5	5.1	5.1	62.844	0	14.076	2851700000	64	2	3	3	2	3	3	71292000	0	0
Q8R2Y2	Q8R2Y2	Cell surface glycoprotein MUC18	Mcam	0.846052	-0.241181	NaN	2	-0.267956	-0.214407	NaN	2472500	2053400	23961000	20652000	NaN	NaN	8	8	8	17	17	17	71.545	0	19.124	22341000	18	5	4	0	6	5	0	657070	0	0
P70699	P70699	Lysosomal alpha-glucosidase	Gaa	0.564681	-0.824491	NaN	2	-0.916829	-0.732153	NaN	1067000	565160	327190000	196970000	NaN	226950	21	21	21	28.3	28.3	28.3	106.25	0	190.28	142890000	66	4	21	1	7	19	1	3247500	0	0
P68134;P68033;P62737;P63268	P68134;P68033;P62737;P63268	Actin, alpha skeletal muscle;Actin, alpha cardiac muscle 1;Actin, aortic smooth muscle;Actin, gamma-enteric smooth muscle	Acta1;Actc1;Acta2;Actg2	1.26329	0.337182	NaN	2	0.297503	0.376862	NaN	1583300	1945900	112390000	145940000	NaN	NaN	32	8	8	57	27.9	27.9	42.051	0	32.961	205130000	26	3	8	0	3	5	0	8918800	0	0
P68510	P68510	14-3-3 protein eta	Ywhah	1.17834	0.236758	NaN	2	0.265437	0.20808	NaN	5330700	6407500	79259000	91556000	1739100	NaN	12	8	8	37.8	31.3	31.3	28.211	0	125.01	94327000	29	6	6	1	6	5	1	5240400	0	0
O55023	O55023	Inositol monophosphatase 1	Impa1	1.36049	0.444122	NaN	2	0.498633	0.389611	NaN	1039300	1468400	5483800	7184000	NaN	NaN	4	4	4	18.4	18.4	18.4	30.436	0	18.744	10094000	12	3	4	0	3	3	0	630850	0	0
Q61704	Q61704	Inter-alpha-trypsin inhibitor heavy chain H3	Itih3	1.11049	0.151201	NaN	2	NaN	0.132087	0.170314	1667100	NaN	11911000	13053000	991910	1116200	15	6	6	19.3	12.6	12.6	99.357	0	20.343	22885000	18	1	2	3	1	3	4	486910	0	0
O54819	O54819	Tissue factor pathway inhibitor	Tfpi	1.40043	0.485868	NaN	2	0.551755	0.419981	NaN	777560	1139800	12891000	17247000	NaN	NaN	5	5	5	19	19	19	34.986	0	32.9	36362000	12	3	4	0	2	4	0	2272600	0	0
Q8BWR2	Q8BWR2	PITH domain-containing protein 1	Pithd1	0.938175	-0.0920714	NaN	2	-0.105902	-0.0782407	NaN	600060	557590	14132000	13386000	NaN	NaN	3	3	3	16.1	16.1	16.1	24.192	0	37.351	7642200	8	2	3	0	2	3	0	509480	0	0
P16460	P16460	Argininosuccinate synthase	Ass1	1.47058	0.556381	NaN	2	0.640954	0.471809	NaN	701570	1094000	6342300	8795800	NaN	NaN	6	6	6	13.3	13.3	13.3	46.584	0	8.3401	29237000	8	2	3	0	3	3	0	1169500	0	0
Q91VU0	Q91VU0	Protein FAM3C	Fam3c	1.31047	0.390087	NaN	2	0.452484	0.32769	NaN	721700	987570	14294000	17939000	NaN	NaN	7	7	7	34.4	34.4	34.4	24.752	0	17.108	12625000	18	4	4	0	4	4	0	841670	0	0
O88199	O88199	Carbohydrate sulfotransferase 3	Chst3	1.7707	0.824319	NaN	2	0.690668	0.957971	NaN	607120	979910	12277000	23849000	NaN	269680	4	4	4	8.3	8.3	8.3	53.996	0	8.7292	21180000	15	2	3	1	2	2	1	683230	0	0
P10126;P62631	P10126;P62631	Elongation factor 1-alpha 1;Elongation factor 1-alpha 2	Eef1a1;Eef1a2	0.873321	-0.195416	NaN	2	-0.229082	-0.161751	NaN	12430000	10605000	120120000	107380000	1929600	NaN	9	9	9	32.7	32.7	32.7	50.113	0	53.115	263080000	98	5	5	2	5	7	1	10523000	0	0
Q8K2I4	Q8K2I4	Beta-mannosidase	Manba	0.679223	-0.558043	NaN	2	-0.655192	-0.460895	NaN	1457800	925690	50555000	36730000	NaN	NaN	11	11	11	13.5	13.5	13.5	100.83	0	65.807	30817000	22	6	7	0	7	7	1	616340	0	0
Q8VDD5;Q61879	Q8VDD5	Myosin-9	Myh9	1.16984	0.226307	NaN	2	0.185165	0.267448	NaN	441630	502110	42155000	50741000	NaN	NaN	15	15	14	13	13	12.2	226.37	0	196.11	46908000	29	2	10	0	7	10	0	363630	0	0
P21107	P21107	Tropomyosin alpha-3 chain	Tpm3	0.883314	-0.179002	NaN	2	-0.146108	-0.211896	NaN	5975200	5399700	24832000	21440000	NaN	397650	17	6	6	38.2	18.2	18.2	32.994	0	7.5953	44581000	21	4	4	1	3	4	1	1857500	0	0
Q9CQ65	Q9CQ65	S-methyl-5-thioadenosine phosphorylase	Mtap	1.27819	0.3541	NaN	2	0.287954	0.420247	NaN	5754000	7025100	58121000	77775000	111080	NaN	7	7	7	23.3	23.3	23.3	31.062	0	38.057	89514000	28	5	7	1	4	7	1	4711300	0	0
Q9Z1T2	Q9Z1T2	Thrombospondin-4	Thbs4	1.33758	0.419629	NaN	2	0.49872	0.340538	NaN	409580	578720	28607000	36223000	NaN	421460	5	4	4	6.7	5.7	5.7	106.37	0	18.968	27712000	14	2	3	0	4	3	1	710560	0	0
P68368	P68368	Tubulin alpha-4A chain	Tuba4a	1.32255	0.403324	NaN	2	0.322821	0.483826	NaN	2938900	3675900	10566000	14776000	NaN	NaN	10	4	4	31.2	11.2	11.2	49.924	0	14.297	33290000	18	3	3	0	3	4	0	1447400	0	0
Q9Z1Z0	Q9Z1Z0	General vesicular transport factor p115	Uso1	0.844266	-0.24423	NaN	2	-0.192831	-0.295629	NaN	376460	329360	16267000	13253000	NaN	NaN	5	5	5	8	8	8	106.98	0	10.049	8495100	9	2	4	0	2	4	0	166570	0	0
Q8R2Z0	Q8R2Z0	Adipolin;Adipolin fCTRP12;Adipolin gCTRP12	Fam132a	1.61412	0.69075	NaN	2	0.840975	0.540525	NaN	333670	597690	14440000	21003000	NaN	NaN	5	5	5	22.7	22.7	22.7	33.267	0	44.456	31361000	13	2	5	0	2	4	0	2240100	0	0
P23492	P23492	Purine nucleoside phosphorylase	Pnp	1.41068	0.496389	NaN	2	0.605242	0.387536	NaN	3993600	6075200	15703000	20542000	NaN	101620	3	3	3	13.1	13.1	13.1	32.277	0	8.7587	35605000	15	2	3	1	2	2	1	1780300	0	0
Q62470	Q62470	Integrin alpha-3;Integrin alpha-3 heavy chain;Integrin alpha-3 light chain	Itga3	1.73464	0.794634	NaN	2	0.618392	0.970877	NaN	1114800	1711400	15237000	29865000	NaN	NaN	8	8	8	14	14	14	116.74	0	44.959	30235000	22	4	3	0	8	4	0	719880	0	0
P13597	P13597	Intercellular adhesion molecule 1	Icam1	0.87083	-0.199536	NaN	2	-0.244317	-0.154756	NaN	1793500	1514100	297300000	267060000	NaN	167100	11	11	11	19	19	19	58.844	0	323.31	164420000	45	4	10	0	4	10	1	5669600	0	0
P26645	P26645	Myristoylated alanine-rich C-kinase substrate	Marcks	0.657426	-0.6051	NaN	2	-0.465875	-0.744325	NaN	423310	306490	22734000	13571000	NaN	NaN	3	3	3	12.3	12.3	12.3	29.661	0	13.182	21879000	10	2	3	0	2	3	0	1823300	0	0
O70458	O70458	Oncostatin-M-specific receptor subunit beta	Osmr	1.20188	0.265289	NaN	2	0.202321	0.328256	NaN	615950	708680	56506000	70943000	NaN	NaN	10	10	10	12.2	12.2	12.2	110.23	0	99.646	55800000	19	4	7	0	4	9	0	930000	0	0
Q9CQ60	Q9CQ60	6-phosphogluconolactonase	Pgls	1.93354	0.951244	NaN	2	0.705869	1.19662	NaN	684680	1116800	6503000	14905000	NaN	NaN	4	4	4	27.6	27.6	27.6	27.254	0	22.998	8763500	15	3	3	0	3	3	0	674110	0	0
Q9R1P0	Q9R1P0	Proteasome subunit alpha type-4	Psma4	1.32141	0.402078	NaN	2	0.296937	0.507219	NaN	17853000	21933000	9893000	14061000	NaN	NaN	10	10	10	38.7	38.7	38.7	29.47	0	74.225	75800000	33	9	3	0	10	2	0	5414300	0	0
P47753	P47753	F-actin-capping protein subunit alpha-1	Capza1	1.65319	0.725249	NaN	2	0.518579	0.931919	NaN	661320	947370	5449700	10397000	NaN	NaN	3	2	2	14.7	11.2	11.2	32.939	0	3.7942	18905000	7	2	2	0	2	2	0	1112000	0	0
Q9JKB1;P58321	Q9JKB1;P58321	Ubiquitin carboxyl-terminal hydrolase isozyme L3;Ubiquitin carboxyl-terminal hydrolase isozyme L4	Uchl3;Uchl4	1.50501	0.589777	NaN	2	0.421408	0.758146	NaN	433300	580290	8560200	14478000	NaN	NaN	5	5	5	27	27	27	26.151	0	28.409	7038900	10	2	4	0	3	4	0	469260	0	0
P97821	P97821	Dipeptidyl peptidase 1;Dipeptidyl peptidase 1 exclusion domain chain;Dipeptidyl peptidase 1 heavy chain;Dipeptidyl peptidase 1 light chain	Ctsc	0.837261	-0.256251	NaN	2	NaN	-0.330893	-0.181609	NaN	NaN	4830800	3840700	474210	418120	4	4	4	13	13	13	52.376	0	140.57	27415000	13	0	2	3	0	2	3	1191900	0	0
O35464	O35464	Semaphorin-6A	Sema6a	1.09276	0.127973	NaN	2	NaN	0.0899987	0.165947	NaN	559340	147120000	156590000	1452800	1629900	11	11	11	12	12	12	114.43	0	145.14	105260000	34	1	10	2	2	11	3	1814800	0	0
Q8CIF4	Q8CIF4	Biotinidase	Btd	1.1878	0.248295	NaN	2	NaN	0.173013	0.323578	378990	NaN	32517000	36660000	1713000	2143700	7	7	7	21.5	21.5	21.5	58.154	0	143.92	109950000	23	3	4	2	1	4	2	5235500	0	0
Q9DCD0	Q9DCD0	6-phosphogluconate dehydrogenase, decarboxylating	Pgd	1.24246	0.313196	NaN	2	0.409929	0.216462	NaN	3239300	4303800	23159000	26908000	NaN	NaN	9	9	9	24.2	24.2	24.2	53.247	0	49.904	97682000	24	6	6	0	6	6	0	3151000	0	0
P35822	P35822	Receptor-type tyrosine-protein phosphatase kappa	Ptprk	1.19877	0.26155	NaN	2	0.347654	0.175447	NaN	4357600	5545000	268880000	303650000	NaN	336970	10	10	10	7.1	7.1	7.1	164.18	0	96.305	185450000	48	6	9	1	6	9	1	2506100	0	0
O54907	O54907	Tumor necrosis factor ligand superfamily member 12;Tumor necrosis factor ligand superfamily member 12, membrane form;Tumor necrosis factor ligand superfamily member 12, secreted form	Tnfsf12	1.64877	0.721387	NaN	2	0.959184	NaN	0.483589	237500	461750	NaN	2923700	438680	613370	3	3	3	16.1	16.1	16.1	27.44	0	30.032	8210600	14	2	1	2	2	1	2	684220	0	0
P97812	P97812	Indian hedgehog protein;Indian hedgehog protein N-product;Indian hedgehog protein C-product	Ihh	1.28652	0.363473	NaN	2	0.485262	0.241684	NaN	737370	1032200	8045100	9512300	NaN	NaN	2	2	2	3.2	3.2	3.2	45.484	0	4.4111	6841600	6	2	2	0	2	2	0	273660	0	0
O88569	O88569	Heterogeneous nuclear ribonucleoproteins A2/B1	Hnrnpa2b1	1.52275	0.606681	NaN	2	0.811747	0.401614	NaN	1012000	1776400	4105800	5423700	285280	NaN	7	7	7	22.4	22.4	22.4	37.402	0	24.806	16694000	19	2	4	6	2	3	1	834710	0	0
Q61982	Q61982	Neurogenic locus notch homolog protein 3;Notch 3 extracellular truncation;Notch 3 intracellular domain	Notch3	1.23214	0.301172	NaN	2	0.19912	0.403223	NaN	394060	452380	8313300	10994000	NaN	NaN	4	4	4	2.4	2.4	2.4	244.25	0	35.968	16653000	12	3	3	0	3	4	0	173470	0	0
Q7TQI3	Q7TQI3	Ubiquitin thioesterase OTUB1	Otub1	1.21365	0.279353	NaN	2	0.179985	0.378721	NaN	1402100	1588400	11113000	14449000	204750	NaN	4	4	4	19.6	19.6	19.6	31.27	0	48.755	24724000	15	4	1	1	4	1	1	1545300	0	0
P19324	P19324	Serpin H1	Serpinh1	1.06391	0.0893718	NaN	2	0.121386	0.0573579	NaN	3134000	3409100	9549200	9936500	NaN	141100	9	9	9	26.9	26.9	26.9	46.533	0	31.34	47868000	20	6	5	1	5	4	1	1841100	0	0
O35516	O35516	Neurogenic locus notch homolog protein 2;Notch 2 extracellular truncation;Notch 2 intracellular domain	Notch2	1.18069	0.239628	NaN	2	0.151254	0.328002	NaN	864530	960090	8556700	10741000	NaN	NaN	5	5	5	3.3	3.3	3.3	265.33	0	19.645	24833000	11	2	3	0	3	2	0	272900	0	0
P60335;P57722	P60335	Poly(rC)-binding protein 1	Pcbp1	1.16995	0.226447	NaN	2	0.142664	0.31023	NaN	3440400	3798000	6959400	8629000	NaN	11439	6	6	4	23.3	23.3	14.6	37.497	0	67.832	30173000	25	4	2	1	4	2	1	1436800	0	0
Q3UQ28	Q3UQ28	Peroxidasin homolog	Pxdn	1.43993	0.525995	NaN	2	0.328859	0.723131	NaN	42567	53465	3346700	5524600	NaN	34873	4	4	4	3.7	3.7	3.7	165.1	0	5.7649	6004000	5	2	2	1	2	2	1	69012	0	0
P47880	P47880	Insulin-like growth factor-binding protein 6	Igfbp6	1.12514	0.170106	NaN	2	0.234547	0.105665	NaN	3549400	4176000	26964000	29013000	NaN	NaN	2	2	2	10.9	10.9	10.9	25.346	0	150.72	28345000	13	1	2	0	1	2	0	2180400	0	0
P12960	P12960	Contactin-1	Cntn1	1.41694	0.502783	NaN	2	0.311917	0.693649	NaN	408070	506560	10041000	16240000	NaN	NaN	8	8	8	10.7	10.7	10.7	113.39	0	30.056	17263000	16	5	3	0	6	3	0	292590	0	0
Q8C0Z1	Q8C0Z1	Protein ITFG3	Itfg3	0.587795	-0.766615	NaN	2	-0.456155	-1.07707	NaN	17095000	12461000	6408800	3037700	NaN	NaN	4	4	4	9.9	9.9	9.9	60.575	0	8.7885	104430000	13	4	2	0	4	3	0	4746600	0	0
Q8VDN2;Q6PIC6;Q6PIE5;Q9WV27;Q64436;Q9Z1W8	Q8VDN2	Sodium/potassium-transporting ATPase subunit alpha-1	Atp1a1	0.877063	-0.189248	NaN	2	-0.111372	-0.267125	NaN	1778100	1646000	35533000	29527000	NaN	NaN	7	7	7	9.1	9.1	9.1	112.98	0	100.3	27365000	30	7	5	0	6	6	0	516330	0	0
Q8R1R4	Q8R1R4	Interleukin-34	Il34	0.710402	-0.493292	NaN	2	-0.697419	-0.289165	NaN	1914300	1180500	4313300	3529900	NaN	NaN	3	3	3	20.4	20.4	20.4	26.764	0	51.262	11064000	13	3	2	0	2	2	0	790260	0	0
Q9CRC9	Q9CRC9	Glucosamine-6-phosphate isomerase 2	Gnpda2	1.27328	0.348553	NaN	2	0.497219	0.199887	NaN	3084400	4353600	17287000	19856000	NaN	NaN	5	5	5	27.2	27.2	27.2	31.083	0	64.9	27822000	20	5	3	0	5	4	0	1636600	0	0
Q6WVG3;Q50H33	Q6WVG3	BTB/POZ domain-containing protein KCTD12	Kctd12	0.757841	-0.400033	NaN	2	-0.57481	-0.225255	NaN	394370	264770	5826800	4984500	NaN	NaN	3	3	3	13.8	13.8	13.8	35.892	0	23.115	10997000	8	2	3	0	2	3	0	646910	0	0
P28654	P28654	Decorin	Dcn	0.653791	-0.613099	NaN	2	-0.336086	-0.890112	NaN	1167400	924800	719570000	388260000	NaN	NaN	18	17	17	38.7	38.7	38.7	39.809	0	135.87	334030000	102	4	16	0	5	16	0	14523000	0	0
Q6ZQ38	Q6ZQ38	Cullin-associated NEDD8-dissociated protein 1	Cand1	2.43693	1.28506	NaN	2	1.88169	0.688435	NaN	411960	1518100	70678000	113900000	NaN	NaN	17	17	17	20.7	20.7	20.7	136.33	0	178.93	68625000	54	6	15	0	12	15	0	1024300	0	0
P35951	P35951	Low-density lipoprotein receptor	Ldlr	1.57779	0.65791	NaN	2	0.970893	0.344926	NaN	1259200	2468100	247440000	314270000	NaN	2044100	11	11	11	16.9	16.9	16.9	94.946	0	185.46	222640000	59	7	7	1	7	9	2	4840000	0	0
Q80YA8	Q80YA8	Protein crumbs homolog 2	Crb2	1.28962	0.36695	NaN	2	0.192364	0.541535	NaN	378940	432990	10072000	14660000	264570	NaN	6	6	6	6.6	6.6	6.6	134.76	0	17.337	20867000	9	2	4	1	2	4	0	521690	0	0
P59999	P59999	Actin-related protein 2/3 complex subunit 4	Arpc4	1.83807	0.878192	NaN	2	NaN	0.454966	1.30142	145470	NaN	4288600	5878600	191410	471770	5	5	5	25	25	25	19.667	0	8.9117	5002700	13	2	4	3	0	3	2	357330	0	0
P57780	P57780	Alpha-actinin-4	Actn4	0.700545	-0.51345	NaN	2	-0.25261	-0.77429	NaN	17513000	14700000	258160000	150940000	NaN	NaN	36	22	22	43.5	27.4	27.4	104.98	0	132.01	180750000	71	14	19	0	15	16	0	3012500	0	0
P62827;Q61820	P62827;Q61820	GTP-binding nuclear protein Ran;GTP-binding nuclear protein Ran, testis-specific isoform	Ran;Rasl2-9	1.18505	0.244951	NaN	2	0.118846	0.371057	NaN	2586600	2808700	30491000	39434000	NaN	24853	4	4	4	18.5	18.5	18.5	24.423	0	7.2526	26247000	12	3	3	1	3	3	1	2187200	0	0
Q99LD8	Q99LD8	N(G),N(G)-dimethylarginine dimethylaminohydrolase 2	Ddah2	1.38726	0.472235	NaN	2	0.228398	0.716072	NaN	11473000	13441000	33440000	54932000	NaN	NaN	11	11	10	48.1	48.1	48.1	29.645	0	62.94	77963000	27	7	6	0	6	6	0	4331300	0	0
O55183	O55183	Stanniocalcin-1	Stc1	0.667586	-0.582975	NaN	2	-0.887803	-0.278147	NaN	1947500	1052500	8207000	6767900	NaN	157400	3	3	3	20.2	20.2	20.2	27.48	0	7.1701	15720000	20	3	2	1	3	2	1	982480	0	0
Q99KB8	Q99KB8	Hydroxyacylglutathione hydrolase, mitochondrial	Hagh	1.39799	0.483355	NaN	2	0.230163	0.736546	NaN	3914600	4591700	1926800	3210400	NaN	NaN	6	6	6	21	21	21	34.084	0	7.3844	16751000	10	4	2	0	5	2	0	881610	0	0
O08859	O08859	Tumor necrosis factor-inducible gene 6 protein	Tnfaip6	0.799851	-0.322197	NaN	2	NaN	-0.152964	-0.49143	NaN	431010	7008000	6303000	95410	67867	5	5	5	16	16	16	30.924	0	89.786	16432000	12	1	2	3	1	2	3	1027000	0	0
P55288	P55288	Cadherin-11	Cdh11	0.698525	-0.517616	NaN	2	-0.792372	-0.242859	NaN	2646200	1527900	162330000	137180000	NaN	NaN	15	15	15	25.5	25.5	25.5	88.111	0	48.258	165650000	33	4	15	0	4	14	0	4247500	0	0
Q9ET01	Q9ET01	Glycogen phosphorylase, liver form	Pygl	0.892331	-0.164349	NaN	2	-0.252316	-0.0763818	NaN	12284000	10313000	182870000	173440000	NaN	NaN	16	16	13	18	18	14.7	97.462	0	40.387	145490000	39	8	13	0	8	13	0	2745100	0	0
P01029	P01029	Complement C4-B;Complement C4 beta chain;Complement C4 alpha chain;C4a anaphylatoxin;Complement C4 gamma chain	C4b	1.06771	0.0945141	NaN	2	NaN	0.0438817	0.145147	NaN	74929	126280000	130180000	9385600	10379000	34	27	27	21.3	18.1	18.1	192.91	0	246.1	157240000	88	1	15	13	1	16	16	1672800	0	0
O35375	O35375	Neuropilin-2	Nrp2	0.742132	-0.430252	NaN	2	-0.663121	-0.197382	NaN	1157700	731100	100400000	87562000	NaN	NaN	6	6	6	7.5	7.5	7.5	104.63	0	80.874	55893000	24	2	6	0	3	5	0	1035100	0	0
Q9ES89	Q9ES89	Exostosin-like 2	Extl2	0.602344	-0.731341	NaN	2	-0.334892	-1.12779	NaN	1830500	1451300	14154000	6477100	NaN	NaN	7	7	7	28.8	28.8	28.8	37.39	0	9.6038	27207000	13	4	4	0	5	3	0	1600400	0	0
P16056	P16056	Hepatocyte growth factor receptor	Met	0.567709	-0.816776	NaN	2	-1.25977	-0.373777	NaN	2572500	1074300	38604000	29793000	NaN	117040	8	8	8	8.3	8.3	8.3	153.55	0	20.389	32664000	25	5	7	0	5	6	1	460060	0	0
P97321	P97321	Prolyl endopeptidase FAP;Antiplasmin-cleaving enzyme FAP, soluble form	Fap	0.740847	-0.432753	NaN	2	-0.670292	-0.195213	NaN	1324200	832100	25783000	22520000	NaN	NaN	3	3	3	6.3	6.3	6.3	87.944	0	47.476	19613000	11	2	3	0	2	3	0	392260	0	0
P63017;P17156	P63017	Heat shock cognate 71 kDa protein	Hspa8	1.32959	0.410978	NaN	2	0.637025	0.184931	NaN	2217000	3447700	38629000	43912000	463280	NaN	10	10	8	18.1	18.1	14.4	70.87	0	64.338	50092000	28	4	7	1	5	5	1	1353800	0	0
Q91V98	Q91V98	Endosialin	Cd248	0.778376	-0.361461	NaN	2	-0.562851	-0.16007	NaN	189390	128210	182730000	163540000	NaN	274620	6	6	6	10.7	10.7	10.7	81.812	0	21.603	144330000	21	2	5	1	2	6	1	4244900	0	0
Q3UGR5	Q3UGR5	Haloacid dehalogenase-like hydrolase domain-containing protein 2	Hdhd2	1.268	0.342558	NaN	2	0.53786	0.147256	NaN	2079600	3019200	4207100	4659200	NaN	NaN	4	4	4	15.1	15.1	15.1	28.73	0	4.5334	12474000	12	3	3	0	3	3	0	891030	0	0
O88839	O88839	Disintegrin and metalloproteinase domain-containing protein 15	Adam15	0.844884	-0.243175	NaN	2	-0.10343	-0.38292	NaN	1144800	1065600	9201000	7056100	NaN	NaN	2	2	2	4.7	4.7	4.7	92.663	0	61.653	11760000	10	2	1	0	2	1	0	250210	0	0
P55002	P55002	Microfibrillar-associated protein 2	Mfap2	1.56121	0.642667	NaN	2	NaN	1.01393	0.271404	NaN	1441500	50401000	101780000	1014100	1224000	6	6	6	32.8	32.8	32.8	20.578	0	86.54	100940000	23	1	3	5	1	2	5	16823000	0	0
Q04447	Q04447	Creatine kinase B-type	Ckb	0.537698	-0.895132	NaN	2	-0.342547	-1.44772	NaN	26056000	20549000	13713000	5027200	NaN	NaN	14	14	14	49.1	49.1	49.1	42.713	0	323.31	379800000	63	11	5	0	13	5	0	16513000	0	0
Q91Y97	Q91Y97	Fructose-bisphosphate aldolase B	Aldob	1.2287	0.297137	NaN	2	0.11327	0.481004	NaN	14288000	15455000	4531800	6325100	NaN	NaN	6	5	5	23.6	21.7	21.7	39.507	0	111.15	124920000	22	5	2	0	5	2	0	6245900	0	0
P11438	P11438	Lysosome-associated membrane glycoprotein 1	Lamp1	0.893163	-0.163005	NaN	2	-0.0615422	-0.264467	NaN	1726500	1654400	57238000	47651000	NaN	NaN	2	2	2	5.4	5.4	5.4	43.865	0	6.3926	36270000	17	2	2	0	2	2	0	2015000	0	0
Q11204	Q11204	CMP-N-acetylneuraminate-beta-galactosamide-alpha-2,3-sialyltransferase 2	St3gal2	1.31014	0.389725	NaN	2	0.144398	0.635053	NaN	1738400	1921400	10369000	16103000	NaN	8321.5	6	6	6	19.1	19.1	19.1	40.129	0	15.505	38074000	22	5	4	0	5	4	1	1730700	0	0
Q99K85	Q99K85	Phosphoserine aminotransferase	Psat1	0.819695	-0.28684	NaN	2	-0.477168	-0.0965118	NaN	1240600	891230	5521700	5164400	NaN	NaN	4	4	4	13.8	13.8	13.8	40.472	0	5.4724	20003000	13	4	3	0	4	3	0	714390	0	0
Q9CVB6	Q9CVB6	Actin-related protein 2/3 complex subunit 2	Arpc2	1.33203	0.413624	NaN	2	0.134428	0.69282	NaN	867320	952020	25803000	41709000	131400	NaN	6	6	6	21.3	21.3	21.3	34.357	0	20.108	30361000	14	3	3	1	4	3	1	1320000	0	0
Q9CQL0	Q9CQL0	Protein N-lysine methyltransferase METTL21A	Mettl21A	0.876823	-0.189642	NaN	2	-0.0604739	-0.31881	NaN	350540	336150	3432200	2751700	NaN	16513	2	2	2	11.5	11.5	11.5	24.286	0	5.462	6326300	8	2	2	0	2	2	1	632630	0	0
O88998	O88998	Noelin	Olfm1	0.783213	-0.352524	NaN	2	-0.594236	-0.110812	NaN	3472700	2300300	47705000	44178000	NaN	180630	3	3	3	6	6	6	55.397	0	17.042	84483000	24	3	3	1	3	3	1	3379300	0	0
Q3V3R4	Q3V3R4	Integrin alpha-1	Itga1	1.53673	0.619867	NaN	2	0.190235	1.0495	NaN	435830	497260	2638500	5461200	NaN	NaN	5	5	5	3.8	3.8	3.8	130.81	0	22.725	9934200	7	3	3	0	4	3	0	168380	0	0
Q76KF0	Q76KF0	Semaphorin-6D	Sema6d	0.690956	-0.533334	NaN	2	NaN	-0.923941	-0.142726	NaN	1003700	28300000	14916000	1737900	1574200	8	8	8	7.6	7.6	7.6	119.81	0	33.836	30464000	21	1	4	4	1	4	4	525240	0	0
Q6PDN3	Q6PDN3	Myosin light chain kinase, smooth muscle;Myosin light chain kinase, smooth muscle, deglutamylated form	Mylk	1.3061	0.385268	NaN	2	0.100731	0.669805	NaN	160820	172450	142420000	226570000	NaN	NaN	5	5	5	2.5	2.5	2.5	212.92	0	6.5405	208050000	12	2	2	0	3	3	0	1719400	0	0
O08529	O08529	Calpain-2 catalytic subunit	Capn2	1.21628	0.282473	NaN	2	NaN	0.0640999	0.500847	NaN	NaN	35041000	36633000	4622400	6540900	8	8	8	9.7	9.7	9.7	79.871	0	49.225	183140000	22	0	4	6	0	4	6	4819400	0	0
O88968	O88968	Transcobalamin-2	Tcn2	1.36919	0.45332	NaN	2	0.101538	0.805101	NaN	1238400	1328700	4109500	7180400	NaN	NaN	8	8	8	34.9	34.9	34.9	47.585	0	79.52	26975000	15	4	4	0	5	6	0	1123900	0	0
P39876	P39876	Metalloproteinase inhibitor 3	Timp3	1.04977	0.0700668	NaN	2	0.0141301	0.126004	NaN	4490800	4535000	5875100	6411300	NaN	39209	6	6	6	28	28	28	24.182	0	16.96	19295000	18	4	3	0	4	2	1	1607900	0	0
P16675	P16675	Lysosomal protective protein;Lysosomal protective protein 32 kDa chain;Lysosomal protective protein 20 kDa chain	Ctsa	1.41051	0.49622	NaN	2	0.89796	0.0944805	NaN	682720	1272200	2635900	2814300	345870	NaN	7	7	7	16.5	16.5	16.5	53.844	0	75.997	76331000	20	5	3	2	6	2	2	3469600	0	0
O55135	O55135	Eukaryotic translation initiation factor 6	Eif6	1.31879	0.399213	NaN	2	0.722682	0.0757447	NaN	899320	1484100	21204000	22347000	NaN	NaN	2	2	2	17.1	17.1	17.1	26.511	0	40.629	15597000	14	2	2	0	2	2	0	1559700	0	0
Q9EQH2	Q9EQH2	Endoplasmic reticulum aminopeptidase 1	Erap1	1.50759	0.592241	NaN	2	1.07509	0.109396	NaN	2570000	5414600	83616000	90203000	NaN	788400	11	11	11	14.6	14.6	14.6	106.6	0	90.496	71223000	37	8	8	1	8	9	1	1369700	0	0
P82198	P82198	Transforming growth factor-beta-induced protein ig-h3	Tgfbi	0.854592	-0.226693	NaN	2	NaN	-0.413109	-0.0402763	NaN	621100	15699000	11790000	296390	288230	7	7	7	12.4	12.4	12.4	74.596	0	10.297	47168000	22	2	5	2	1	5	2	1096900	0	0
Q8VHY0	Q8VHY0	Chondroitin sulfate proteoglycan 4	Cspg4	1.37098	0.455206	NaN	2	0.0794535	0.830959	NaN	257340	271910	12748000	22677000	NaN	NaN	10	10	10	6.5	6.5	6.5	252.31	0	34.25	32925000	17	3	8	0	4	7	0	374150	0	0
Q9WTR5	Q9WTR5	Cadherin-13	Cdh13	1.40472	0.490279	NaN	2	0.0748794	0.905678	NaN	10831000	11408000	74991000	140490000	NaN	239470	9	9	9	15.8	15.8	15.8	78.185	0	61.829	97819000	55	8	8	1	9	8	1	2717200	0	0
Q62381	Q62381	Tolloid-like protein 1	Tll1	0.607457	-0.719145	NaN	2	-1.33748	-0.100806	NaN	1051300	416010	116020000	108190000	NaN	NaN	15	11	11	15.3	11.6	11.6	114.53	0	44.992	78422000	33	4	11	0	4	8	0	1170500	0	0
A2ARV4	A2ARV4	Low-density lipoprotein receptor-related protein 2	Lrp2	1.30638	0.385572	NaN	2	0.0517327	0.719411	NaN	826370	856540	29237000	48139000	NaN	523400	13	13	13	2.9	2.9	2.9	519.2	0	52.343	68502000	38	6	10	2	6	9	3	290260	0	0
Q9Z2U0;Q9CWH6	Q9Z2U0;Q9CWH6	Proteasome subunit alpha type-7;Proteasome subunit alpha type-7-like	Psma7;Psma8	1.09396	0.129566	NaN	2	0.0162635	0.242869	NaN	10585000	10705000	25324000	29967000	NaN	71341	10	10	10	49.2	49.2	49.2	27.855	0	54.197	48577000	31	8	6	1	8	5	1	3036000	0	0
Q7TPR4	Q7TPR4	Alpha-actinin-1	Actn1	0.940245	-0.0888908	NaN	2	-0.0108435	-0.166938	NaN	23638000	23461000	620030000	552280000	NaN	693960	42	42	26	53	53	35.3	103.07	0	323.31	409230000	110	15	20	1	16	21	1	7055600	0	0
Q9WU78	Q9WU78	Programmed cell death 6-interacting protein	Pdcd6ip	0.847871	-0.238083	NaN	2	-0.0269201	-0.449245	NaN	3997500	3923600	55764000	40843000	45522	NaN	15	15	15	22.6	22.6	22.6	96.023	0	94.416	42050000	38	11	10	1	11	10	0	778700	0	0
Q9ES46	Q9ES46	Beta-parvin	Parvb	1.09103	0.125695	NaN	2	0.0127405	0.238649	NaN	1589600	1603700	8591500	10137000	NaN	NaN	5	5	5	14.2	14.2	14.2	41.669	0	132.5	26100000	13	3	4	0	3	4	0	1305000	0	0
P08113	P08113	Endoplasmin	Hsp90b1	0.71237	-0.489302	NaN	2	-0.0471854	-0.931418	NaN	9034300	8743600	296600000	155520000	NaN	614030	16	14	14	21.9	20.2	20.2	92.475	0	216.41	169700000	62	11	12	1	11	11	2	3610600	0	0
Q8BKC5	Q8BKC5	Importin-5	Ipo5	1.6583	0.729707	NaN	2	1.39316	0.0662504	NaN	125850	330550	49285000	51601000	NaN	196540	12	12	12	14	14	14	123.59	0	58.914	27410000	27	2	11	1	3	11	1	480880	0	0
P27046	P27046	Alpha-mannosidase 2	Man2a1	1.57085	0.651543	NaN	2	1.24928	0.0538052	NaN	216420	514480	160530000	166630000	NaN	NaN	24	24	23	25	25	24.3	131.63	0	95.233	112570000	47	3	22	0	4	23	0	1786900	0	0
Q9WVA4;Q9R1Q8	Q9WVA4	Transgelin-2	Tagln2	1.26249	0.336276	NaN	2	0.0215121	0.651041	NaN	1271400	1290500	12539000	19690000	NaN	NaN	5	5	5	29.6	29.6	29.6	22.395	0	72.208	18904000	20	3	4	0	4	4	0	1350300	0	0
Q91V41	Q91V41	Ras-related protein Rab-14	Rab14	1.21185	0.277214	NaN	2	0.53847	0.015958	NaN	638020	926680	13486000	13636000	NaN	NaN	6	6	6	39.5	39.5	39.5	23.897	0	60.162	11331000	17	4	4	0	5	2	0	708200	0	0
Q9WV54	Q9WV54	Acid ceramidase;Acid ceramidase subunit alpha;Acid ceramidase subunit beta	Asah1	1.43686	0.522915	NaN	2	0.0244269	1.0214	NaN	5294100	5384500	11909000	24174000	707170	NaN	8	8	8	22.6	22.6	22.6	44.669	0	81.555	79941000	29	8	5	1	7	5	1	3330900	0	0
Q9CWS0	Q9CWS0	N(G),N(G)-dimethylarginine dimethylaminohydrolase 1	Ddah1	0.984318	-0.0228034	NaN	2	-0.044949	-0.000657689	NaN	2259100	2189800	26329000	26317000	NaN	257300	6	5	5	27.7	24.9	24.9	31.381	0	15.179	55960000	14	3	4	1	3	4	1	2945300	0	0
Q9Z1W4	Q9Z1W4	Growth/differentiation factor 11	Gdf11	1.24213	0.312812	NaN	2	NaN	0.00595423	0.619671	354730	NaN	6214200	6239900	1362100	2092900	6	6	6	16	16	16	44.946	0	107.68	28104000	20	1	4	4	1	4	4	1405200	0	0
Q64191	Q64191	N(4)-(beta-N-acetylglucosaminyl)-L-asparaginase;Glycosylasparaginase alpha chain;Glycosylasparaginase beta chain	Aga	1.12982	0.176089	NaN	2	0.000878965	0.351299	NaN	1148600	1149300	10337000	13187000	NaN	NaN	4	4	4	15	15	15	37.022	0	134.73	9509900	10	2	2	0	2	3	0	528330	0	0
Q8BYI9	Q8BYI9	Tenascin-R	Tnr	1.34503	0.427641	NaN	2	NaN	0.853414	0.0018667	NaN	NaN	2770300	5005300	2162600	2165400	10	10	10	10.2	10.2	10.2	149.59	0	170.99	14257000	27	0	3	8	0	2	10	216010	0	0
E9Q7X6	E9Q7X6	Protein HEG homolog 1	Heg1	0.818503	-0.288941	NaN	2	-0.000572633	-0.577309	NaN	5291800	5289700	85255000	57139000	NaN	722300	15	15	15	15.2	15.2	15.2	141.9	0	94.678	102720000	66	9	10	2	9	7	4	1741000	0	0
P97300	P97300	Neuroplastin	Nptn	0.552596	-0.855704	NaN	2	-1.71611	0.00470071	NaN	5663200	1723700	30641000	30741000	NaN	243300	3	3	3	5	5	5	44.373	0	8.8318	149760000	18	3	3	1	3	2	1	6807300	0	0
Q04998	Q04998	Inhibin beta A chain	Inhba	1.39429	0.479534	NaN	2	-0.0037008	0.962769	NaN	3864300	3854400	7972100	15538000	NaN	NaN	9	9	9	23.1	23.1	23.1	47.392	0	91.534	65644000	27	8	5	0	8	6	1	2188100	0	0
P28481	P28481	Collagen alpha-1(II) chain;Collagen alpha-1(II) chain;Chondrocalcin	Col2a1	1.08047	0.111664	NaN	2	0.230987	-0.00765831	NaN	6187600	7262000	11333000	11273000	NaN	NaN	5	4	4	5	4	4	141.97	0	60.765	39360000	15	3	3	0	2	3	0	442250	0	0
P51910	P51910	Apolipoprotein D	Apod	0.655547	-0.609228	NaN	2	-1.27301	0.0545575	NaN	26953000	11153000	521270000	541360000	NaN	NaN	7	7	7	36	36	36	21.53	0	66.317	601080000	60	5	7	0	5	7	0	54643000	0	0
Q9Z100	Q9Z100	Probable carboxypeptidase X1	Cpxm1	0.914541	-0.12888	NaN	2	0.0147373	-0.272497	NaN	814220	822580	212010000	175520000	NaN	NaN	11	11	11	28.4	28.4	28.4	80.906	0	81.712	104730000	33	2	10	0	4	11	0	3080300	0	0
P01831	P01831	Thy-1 membrane glycoprotein	Thy1	1.07952	0.110388	NaN	2	-0.0143147	0.235091	NaN	9632200	9537100	8387900	9872400	NaN	NaN	5	5	5	32.1	32.1	32.1	18.08	0	44.002	39303000	22	5	2	0	5	2	0	4367000	0	0
P56564	P56564	Excitatory amino acid transporter 1	Slc1a3	1.41977	0.50566	NaN	2	1.08109	-0.0697751	NaN	1535800	3249200	14678000	13985000	NaN	NaN	3	3	3	10.9	10.9	10.9	59.622	0	39.823	43594000	31	2	3	0	2	3	0	2421900	0	0
Q9R087	Q9R087	Glypican-6;Secreted glypican-6	Gpc6	0.875384	-0.192013	NaN	2	-0.416066	0.032041	NaN	2571700	1927400	33708000	34465000	NaN	430030	7	5	5	16.9	12.4	12.4	63.056	0	12.221	56878000	19	3	4	1	4	3	1	1458400	0	0
P01027	P01027	Complement C3;Complement C3 beta chain;C3-beta-c;Complement C3 alpha chain;C3a anaphylatoxin;Acylation stimulating protein;Complement C3b alpha chain;Complement C3c alpha chain fragment 1;Complement C3dg fragment;Complement C3g fragment;Complement C3d fragment;Complement C3f fragment;Complement C3c alpha chain fragment 2	C3	0.93747	-0.093156	NaN	2	NaN	0.0166067	-0.202919	NaN	NaN	6469500	6544400	1763600	1532200	21	9	9	13.4	8.4	8.4	186.48	0	25.582	23703000	16	0	4	6	0	4	5	207920	0	0
Q62433	Q62433	Protein NDRG1	Ndrg1	1.05429	0.0762675	NaN	2	0.167386	-0.0148508	NaN	1977700	2221000	5253400	5199600	NaN	NaN	4	4	4	15.7	15.7	15.7	43.008	0	78.81	34021000	10	4	2	0	4	2	0	2126300	0	0
Q9CPV4	Q9CPV4	Glyoxalase domain-containing protein 4	Glod4	1.30525	0.384325	NaN	2	-0.0748649	0.843515	NaN	5009000	4755700	20133000	36127000	NaN	NaN	9	9	9	28.9	28.9	28.9	33.316	0	52.752	50763000	22	5	5	0	5	6	0	2307400	0	0
O54990	O54990	Prominin-1	Prom1	1.21388	0.279629	NaN	2	0.616033	-0.0567739	NaN	457670	701450	59111000	56830000	NaN	NaN	10	10	10	16	16	16	97.112	0	82.007	51377000	29	4	8	0	7	9	0	1253100	0	0
Q8VHX6	Q8VHX6	Filamin-C	Flnc	1.12017	0.163722	NaN	2	0.364329	-0.036884	NaN	1448400	1864500	58672000	57191000	NaN	NaN	19	14	14	9.2	7.4	7.4	291.12	0	83.206	78676000	62	10	10	0	11	11	0	479730	0	0
P97350	P97350	Plakophilin-1	Pkp1	0.877126	-0.189144	NaN	2	NaN	0.0448428	-0.423131	NaN	245390	30978000	31956000	290760	216850	5	5	5	8.1	8.1	8.1	80.895	0	141.17	33950000	22	2	4	4	1	3	3	628710	0	0
P98086	P98086	Complement C1q subcomponent subunit A	C1qa	1.55595	0.637792	NaN	2	1.43167	-0.156089	NaN	4484000	12096000	21532000	19324000	35624	NaN	6	6	6	27.3	27.3	27.3	25.974	0	94.019	47745000	28	5	4	1	5	4	0	2984000	0	0
Q8BKG3	Q8BKG3	Inactive tyrosine-protein kinase 7	Ptk7	0.851763	-0.231476	NaN	2	-0.521187	0.0582346	NaN	1961400	1366700	301280000	313690000	NaN	NaN	13	13	13	17.4	17.4	17.4	117.53	0	68.603	161550000	41	5	12	0	7	12	0	2692600	0	0
Q64449	Q64449	C-type mannose receptor 2	Mrc2	1.30807	0.387438	NaN	2	-0.0981186	0.872995	NaN	759550	709610	34366000	62940000	NaN	NaN	4	4	4	2.8	2.8	2.8	167.07	0	122.7	67697000	15	3	4	0	3	4	0	995550	0	0
O88844;P54071	O88844	Isocitrate dehydrogenase [NADP] cytoplasmic	Idh1	1.26925	0.34398	NaN	2	-0.0895635	0.777523	NaN	996130	936170	17109000	29328000	NaN	NaN	6	6	6	18.6	18.6	18.6	46.674	0	24.163	64821000	17	3	5	0	4	5	0	2091000	0	0
Q9D2L5	Q9D2L5	Inactive carboxypeptidase-like protein X2	Cpxm2	1.11927	0.162553	NaN	2	0.368819	-0.0437125	NaN	703650	908620	9964900	9667500	NaN	NaN	4	3	3	6.4	5.2	5.2	86.962	0	5.2605	7952300	6	2	2	0	2	3	0	180730	0	0
Q8CI19	Q8CI19	Platelet-derived growth factor C;Platelet-derived growth factor C, latent form;Platelet-derived growth factor C, receptor-binding form	Pdgfc	1.54199	0.624794	NaN	2	-0.183484	1.43307	NaN	9643600	8491900	8788200	23730000	NaN	NaN	4	4	4	11.6	11.6	11.6	38.741	0	5.9729	45557000	19	4	2	0	4	2	0	1980700	0	0
Q99LX0	Q99LX0	Protein deglycase DJ-1	Park7	1.28719	0.364222	NaN	2	NaN	0.838118	-0.109675	NaN	1154400	42547000	76062000	195210	180920	7	7	7	38.6	38.6	38.6	20.021	0	18.345	33503000	26	1	4	1	5	4	1	2577200	0	0
Q03157	Q03157	Amyloid-like protein 1;C30	Aplp1	0.896303	-0.157942	NaN	2	-0.364494	0.0486098	NaN	385830	299690	25826000	26711000	NaN	NaN	5	4	4	9.6	8.7	8.7	72.75	0	60.014	19597000	10	2	4	0	2	4	0	489940	0	0
Q11011	Q11011	Puromycin-sensitive aminopeptidase	Npepps	1.26462	0.338704	NaN	2	-0.110075	0.787483	NaN	9004900	8343400	190480000	328780000	NaN	NaN	20	20	20	25.9	25.9	25.9	103.32	0	90.729	169540000	66	9	18	0	9	18	0	2974500	0	0
P47879	P47879	Insulin-like growth factor-binding protein 4	Igfbp4	1.25504	0.327728	NaN	2	-0.106927	0.762384	NaN	640710	594940	36400000	61745000	NaN	23983	6	6	6	26.8	26.8	26.8	27.807	0	47.079	77703000	21	3	6	1	3	6	1	4856400	0	0
P07310	P07310	Creatine kinase M-type	Ckm	0.336149	-1.57283	NaN	2	0.516263	-3.66192	NaN	145870	208630	75831000	5991000	NaN	NaN	11	11	11	29.9	29.9	29.9	43.044	0	217.05	54557000	20	2	10	0	2	3	0	2182300	0	0
Q8CI51	Q8CI51	PDZ and LIM domain protein 5	Pdlim5	0.879553	-0.185158	NaN	2	-0.433712	0.0633951	NaN	771090	570880	32256000	33705000	NaN	NaN	4	4	4	10	10	10	63.299	0	41.724	21354000	24	2	3	0	2	3	0	593170	0	0
P14602	P14602	Heat shock protein beta-1	Hspb1	0.585766	-0.771603	NaN	2	0.303554	-1.84676	NaN	657740	811770	36149000	10050000	NaN	NaN	4	4	4	24.4	24.4	24.4	23.014	0	12.949	14399000	12	2	4	0	2	1	0	1028500	0	0
P02469	P02469	Laminin subunit beta-1	Lamb1	0.928971	-0.106294	NaN	2	-0.256663	0.0440746	NaN	287830	240920	12314000	12696000	NaN	NaN	10	9	9	7.4	7.1	7.1	197.09	0	24.644	18490000	18	2	8	0	2	8	0	190620	0	0
Q07113	Q07113	Cation-independent mannose-6-phosphate receptor	Igf2r	0.871191	-0.19894	NaN	2	0.0858308	-0.48371	NaN	1155000	1225800	13524000	9671500	NaN	NaN	3	3	3	1.7	1.7	1.7	273.81	0	6.6369	30728000	14	3	2	0	3	2	0	229310	0	0
Q9Z0S1	Q9Z0S1	3(2),5-bisphosphate nucleotidase 1	Bpnt1	0.761129	-0.393788	NaN	2	-0.97034	0.182764	NaN	557500	284540	4479600	5084600	NaN	NaN	3	3	3	9.1	9.1	9.1	33.196	0	6.36	14122000	8	2	2	0	2	3	0	641920	0	0
Q9ER58	Q9ER58	Testican-2	Spock2	1.83599	0.876562	NaN	2	-0.421086	NaN	2.17421	1136100	848510	NaN	17780000	1184300	5345200	4	4	4	9.5	9.5	9.5	46.863	0	5.6458	59607000	16	3	2	2	3	2	2	2292600	0	0
Q7TT15	Q7TT15	Putative polypeptide N-acetylgalactosaminyltransferase-like protein 3	Wbscr17	0.901578	-0.149475	NaN	2	NaN	-0.372166	0.0732153	532260	NaN	11520000	8900600	275650	290000	6	6	6	11.5	11.5	11.5	67.69	0	14.514	31366000	14	3	3	2	1	3	4	871260	0	0
P02468	P02468	Laminin subunit gamma-1	Lamc1	1.17569	0.233507	NaN	2	-0.117349	0.584363	NaN	895930	825940	60982000	91435000	NaN	NaN	16	16	16	14.2	14.2	14.2	177.3	0	185.03	112370000	48	8	15	0	11	15	0	1276900	0	0
P23506	P23506	Protein-L-isoaspartate(D-aspartate) O-methyltransferase	Pcmt1	0.725995	-0.461968	NaN	2	0.241818	-1.16575	NaN	883650	1044900	38079000	16973000	NaN	21281	5	5	5	36.1	36.1	36.1	24.634	0	102.58	19255000	16	2	5	1	3	2	1	1604600	0	0
P49722	P49722	Proteasome subunit alpha type-2	Psma2	1.43888	0.524946	NaN	2	-0.279193	1.32909	NaN	2140400	1763800	14115000	35463000	NaN	NaN	9	9	9	42.3	42.3	42.3	25.926	0	24.748	24837000	20	5	4	0	7	2	0	1552300	0	0
Q8K1B8	Q8K1B8	Fermitin family homolog 3	Fermt3	0.807215	-0.308975	NaN	2	-0.785385	0.167436	NaN	906020	525670	7811600	8772900	NaN	512560	4	4	4	7.1	7.1	7.1	75.634	0	7.336	36038000	11	3	4	1	3	3	1	878980	0	0
P09470	P09470	Angiotensin-converting enzyme;Angiotensin-converting enzyme, soluble form	Ace	1.08396	0.116305	NaN	2	0.296165	-0.0635552	NaN	1611400	1978600	143630000	137440000	774120	NaN	13	13	13	12.3	12.3	12.3	150.92	0	70.704	181850000	40	3	11	1	3	8	1	2491100	0	0
Q06806	Q06806	Tyrosine-protein kinase receptor Tie-1	Tie1	0.897854	-0.155447	NaN	2	-0.396046	0.0851519	NaN	1229100	934040	7052700	7481500	NaN	NaN	2	2	2	2.4	2.4	2.4	124.58	0	34.523	8234800	7	2	2	0	2	2	0	144470	0	0
P07356	P07356	Annexin A2	Anxa2	0.821239	-0.284126	NaN	2	-0.730536	0.162285	NaN	15971000	9625400	73443000	82187000	267830	NaN	11	11	11	34.8	34.8	34.8	38.676	0	229.89	167290000	80	10	8	3	10	9	1	6691400	0	0
P49945;P29391	P49945;P29391	Ferritin light chain 2;Ferritin light chain 1	Ftl2;Ftl1	1.17263	0.229749	NaN	2	-0.142549	0.602046	NaN	31196000	28261000	613690000	931500000	NaN	566240	3	3	3	23	23	23	20.842	0	73.048	1104400000	58	3	2	2	3	3	2	84957000	0	0
P60766	P60766	Cell division control protein 42 homolog	Cdc42	0.913534	-0.13047	NaN	2	-0.35656	NaN	0.0956204	1256900	981670	NaN	12438000	259760	277560	6	6	6	30.4	30.4	30.4	21.258	0	20.196	13311000	17	3	1	2	3	5	2	1479000	0	0
P35278	P35278	Ras-related protein Rab-5C	Rab5c	1.13633	0.18438	NaN	2	0.508191	-0.139432	NaN	813280	1156700	23512000	21346000	NaN	NaN	6	6	5	33.3	33.3	28.2	23.412	0	100.28	14891000	18	4	5	0	4	4	0	1063600	0	0
O70435	O70435	Proteasome subunit alpha type-3	Psma3	0.900164	-0.15174	NaN	2	0.139948	-0.443427	NaN	9337800	10289000	44049000	32393000	NaN	353490	10	10	10	42.7	42.7	42.7	28.405	0	323.31	75342000	29	8	5	1	9	5	1	5022800	0	0
Q9WV91	Q9WV91	Prostaglandin F2 receptor negative regulator	Ptgfrn	1.13253	0.179544	NaN	2	-0.171911	0.530999	NaN	2308300	2049000	83665000	120890000	NaN	NaN	15	15	15	20.1	20.1	20.1	98.72	0	48.883	84998000	49	9	11	0	11	11	0	1574000	0	0
Q61316;Q61699	Q61316	Heat shock 70 kDa protein 4	Hspa4	1.13523	0.182979	NaN	2	0.542826	-0.176867	NaN	736740	1073300	23774000	21031000	NaN	NaN	6	6	6	8.9	8.9	8.9	94.132	0	31.963	14418000	13	3	6	0	3	6	0	252940	0	0
Q01721	Q01721	Growth arrest-specific protein 1	Gas1	1.30112	0.379756	NaN	2	NaN	1.13415	-0.374639	436290	NaN	29303000	64317000	293570	226430	3	3	3	19.5	19.5	19.5	35.694	0	82.256	69944000	21	2	2	3	1	2	3	3497200	0	0
Q921I1	Q921I1	Serotransferrin	Tf	1.02705	0.0385053	NaN	2	NaN	-0.0393164	0.116327	NaN	NaN	5293100	5150800	455630	493890	14	8	8	22.5	17.1	17.1	76.723	0	35.744	21568000	13	0	3	5	0	2	5	513530	0	0
O35684	O35684	Neuroserpin	Serpini1	0.727486	-0.459009	NaN	2	0.477542	-1.39556	NaN	194740	271150	4313900	1639700	NaN	NaN	3	3	3	9.8	9.8	9.8	46.347	0	9.5047	29596000	6	2	3	0	2	2	0	1557700	0	0
Q8CBR6	Q8CBR6	Tsukushin	Tsku	1.17965	0.238358	NaN	2	-0.250953	0.727669	NaN	2345000	1970600	4717500	7812000	15612	NaN	6	6	6	29.9	29.9	29.9	38.362	0	51.571	28111000	18	5	2	1	6	2	0	2342500	0	0
P47754	P47754	F-actin-capping protein subunit alpha-2	Capza2	1.08663	0.119855	NaN	2	0.375653	-0.135944	NaN	560810	727610	4799500	4367900	NaN	NaN	4	4	3	19.9	19.9	16.4	32.967	0	24.881	12015000	9	3	2	0	3	2	0	750930	0	0
Q8BYM5	Q8BYM5	Neuroligin-3	Nlgn3	1.04618	0.0651359	NaN	2	NaN	0.206943	-0.0766713	NaN	758680	48833000	56365000	1624900	1540800	9	9	7	14.5	14.5	11.5	91.161	0	115.71	44347000	23	2	5	4	1	6	4	1583800	0	0
P62874;Q61011	P62874	Guanine nucleotide-binding protein G(I)/G(S)/G(T) subunit beta-1	Gnb1	1.07027	0.0979692	NaN	2	-0.118686	0.314624	NaN	2806000	2584400	20079000	24972000	NaN	NaN	7	7	5	30	30	24.1	37.377	0	108.47	44734000	20	3	4	0	3	4	0	3441000	0	0
P70428	P70428	Exostosin-2	Ext2	1.02073	0.0295983	NaN	2	0.0953761	-0.0361795	NaN	382770	408930	30970000	30203000	NaN	NaN	7	7	7	12.8	12.8	12.8	82.063	0	23.208	33099000	12	2	6	0	2	6	0	752260	0	0
Q64374	Q64374	Regucalcin	Rgn	1.17913	0.237723	NaN	2	-0.290922	0.766368	NaN	3321100	2714600	3775700	6422400	NaN	NaN	2	2	2	9.4	9.4	9.4	33.406	0	45.796	19233000	16	2	2	0	2	2	0	961630	0	0
Q8JZZ7	Q8JZZ7	Latrophilin-2	Lphn2	0.893907	-0.161804	NaN	2	-0.526421	0.202813	NaN	154060	106960	6567500	7558800	NaN	NaN	3	3	3	2.3	2.3	2.3	166.58	0	14.561	5597100	10	2	3	0	3	3	0	77737	0	0
Q8CHR6	Q8CHR6	Dihydropyrimidine dehydrogenase [NADP(+)]	Dpyd	1.85599	0.892189	NaN	2	2.90434	-1.11996	NaN	1192000	8924200	26057000	11989000	NaN	NaN	4	4	4	7.4	7.4	7.4	111.25	0	6.2404	127700000	10	2	4	0	3	4	0	2240400	0	0
P05063	P05063	Fructose-bisphosphate aldolase C	Aldoc	1.12417	0.168854	NaN	2	-0.221571	0.559279	NaN	9481000	8131200	3740400	5511600	NaN	NaN	9	7	7	36.4	26.7	26.7	39.394	0	323.31	81739000	28	6	2	0	7	2	0	3405800	0	0
P25785	P25785	Metalloproteinase inhibitor 2	Timp2	1.28578	0.362649	NaN	2	NaN	-0.482333	1.20763	4010900	NaN	50489000	36141000	952770	2200500	4	4	4	24.1	24.1	24.1	24.328	0	9.8388	56536000	16	1	3	3	2	3	2	3533500	0	0
P29268	P29268	Connective tissue growth factor	Ctgf	0.855284	-0.225524	NaN	2	-0.755095	0.304047	NaN	10397000	6160300	2714800	3351700	NaN	NaN	11	11	11	31.9	31.9	31.9	37.824	0	22.666	65162000	24	11	3	0	11	3	0	2715100	0	0
P11499	P11499	Heat shock protein HSP 90-beta	Hsp90ab1	0.957172	-0.0631506	NaN	2	-0.217305	0.0910033	NaN	5179900	4455600	278910000	297070000	411760	NaN	30	19	17	39.1	25.7	23.8	83.28	0	85.145	239490000	66	10	13	1	11	13	1	6302400	0	0
E9Q414	E9Q414	Apolipoprotein B-100;Apolipoprotein B-48	Apob	0.696718	-0.521352	NaN	2	-1.80692	0.764211	NaN	12628000	3609100	80727000	137110000	NaN	NaN	3	2	2	0.8	0.5	0.5	509.43	0	36.882	221650000	21	2	2	0	2	2	0	849220	0	0
Q9CQM9	Q9CQM9	Glutaredoxin-3	Glrx3	1.21107	0.276285	NaN	2	0.964198	-0.411628	NaN	586680	1144600	8339200	6269200	NaN	NaN	6	6	6	25.2	25.2	25.2	37.778	0	63.603	21609000	15	5	3	0	5	4	0	1137300	0	0
Q9WVJ3	Q9WVJ3	Carboxypeptidase Q	Cpq	0.802204	-0.317959	NaN	2	-1.1131	0.477178	NaN	7207000	3331800	49638000	69097000	NaN	364360	7	7	7	24.5	24.5	24.5	51.813	0	49.919	741810000	27	6	5	1	6	5	1	37091000	0	0
Q8CI94	Q8CI94	Glycogen phosphorylase, brain form	Pygb	1.05351	0.0752011	NaN	2	-0.114252	0.264654	NaN	1176800	1087200	31458000	37792000	NaN	NaN	11	8	7	18.1	14.8	13.8	96.729	0	13.9	24529000	14	4	5	0	3	4	0	462810	0	0
P52850	P52850	Bifunctional heparan sulfate N-deacetylase/N-sulfotransferase 2;Heparan sulfate N-deacetylase 2;Heparan sulfate N-sulfotransferase 2	Ndst2	1.16742	0.223318	NaN	2	0.795669	-0.349033	NaN	151410	262830	6785800	5327600	NaN	NaN	7	6	6	7.7	6.3	6.3	101.2	0	11.583	4478800	8	2	3	0	3	3	0	84507	0	0
P26262	P26262	Plasma kallikrein;Plasma kallikrein heavy chain;Plasma kallikrein light chain	Klkb1	0.786569	-0.346355	NaN	2	-1.27253	0.579823	NaN	6488500	2685800	15748000	23538000	NaN	NaN	1	1	1	1.6	1.6	1.6	71.382	0.0090909	2.3268	37335000	9	1	1	0	1	1	0	848510	0	0
Q9Z0J1	Q9Z0J1	Reversion-inducing cysteine-rich protein with Kazal motifs	Reck	0.842388	-0.247443	NaN	2	-0.914947	0.420062	NaN	479030	254060	13258000	17739000	NaN	NaN	3	3	3	3.2	3.2	3.2	106.08	0	5.9943	14633000	9	2	3	0	3	3	0	292660	0	0
Q9D1G5	Q9D1G5	Leucine-rich repeat-containing protein 57	Lrrc57	0.947404	-0.0779484	NaN	2	0.138134	-0.294031	NaN	648380	713530	10141000	8271200	NaN	NaN	6	6	6	38.5	38.5	38.5	26.76	0	25.009	8974900	14	3	6	0	5	2	0	560930	0	0
P27090	P27090	Transforming growth factor beta-2;Latency-associated peptide	Tgfb2	1.31947	0.399961	NaN	2	-0.74338	NaN	1.5433	1299800	776420	2910800	NaN	435770	1270100	5	5	5	10.6	10.6	10.6	47.588	0	41.326	19724000	13	2	2	3	2	1	4	896540	0	0
P20152	P20152	Vimentin	Vim	1.0658	0.0919306	NaN	2	0.367384	-0.183523	NaN	13065000	16854000	86639000	76290000	187330	NaN	19	18	14	40.8	39.3	32.8	53.687	0	79.594	116700000	49	10	7	1	9	9	0	3334200	0	0
P0C192	P0C192	Leucine-rich repeat-containing protein 4B	Lrrc4b	1.2528	0.325151	NaN	2	1.30594	-0.65564	NaN	85215	210690	31218000	19817000	NaN	NaN	4	4	4	7.3	7.3	7.3	76.155	0	71.278	15943000	12	2	3	0	3	4	0	483120	0	0
P47757	P47757	F-actin-capping protein subunit beta	Capzb	0.891934	-0.164991	NaN	2	-0.663111	0.333129	NaN	9748300	6156200	43339000	54596000	NaN	73322	9	9	9	40.8	40.8	40.8	31.345	0	42.712	70975000	35	6	8	1	6	7	2	3548800	0	0
Q80X90	Q80X90	Filamin-B	Flnb	0.904446	-0.144893	NaN	2	0.296657	-0.586444	NaN	4228300	5193600	297260000	197970000	NaN	NaN	47	43	43	24.6	23.3	23.3	277.82	0	282.39	319650000	196	21	37	0	27	32	0	2062200	0	0
Q8CFG0	Q8CFG0	Extracellular sulfatase Sulf-2	Sulf2	0.908344	-0.138689	NaN	2	-0.562259	0.284881	NaN	4520400	3061400	6654300	8107000	NaN	NaN	6	6	6	8.9	8.9	8.9	100.5	0	193.44	33560000	24	5	3	0	6	3	0	860510	0	0
P62806	P62806	Histone H4	Hist1h4a	0.72581	-0.462335	NaN	2	NaN	1.00288	-1.92755	1968200	NaN	4158600	8333800	876460	230400	4	4	4	38.8	38.8	38.8	11.367	0	7.4429	17818000	13	4	1	1	1	1	1	2969700	0	0
B0V2N1	B0V2N1	Receptor-type tyrosine-protein phosphatase S	Ptprs	0.922902	-0.11575	NaN	2	-0.48592	0.254419	NaN	901740	643880	45236000	53960000	NaN	NaN	8	8	8	7.8	7.8	7.8	211.9	0	100.94	47554000	41	4	6	0	7	7	0	461690	0	0
P07759;P29621;Q80X76	P07759;P29621	Serine protease inhibitor A3K;Serine protease inhibitor A3C	Serpina3k;Serpina3c	0.959329	-0.0599023	NaN	2	-0.254953	0.135148	NaN	275580	230940	5495600	6035300	NaN	100110	4	2	2	12.4	8.9	8.9	46.879	0	63.623	47021000	19	1	1	0	1	2	1	2351000	0	0
P61021	P61021	Ras-related protein Rab-5B	Rab5b	0.973881	-0.0381826	NaN	2	-0.169032	0.0926666	NaN	890190	791770	5173400	5516600	NaN	NaN	4	3	3	22.8	17.7	17.7	23.707	0	5.4185	5141100	5	2	3	0	2	2	0	367220	0	0
P10107	P10107	Annexin A1	Anxa1	1.12346	0.167952	NaN	2	-0.506795	0.8427	NaN	17072000	12015000	43568000	78135000	NaN	NaN	16	16	16	45.1	45.1	45.1	38.734	0	323.31	110470000	70	13	9	0	13	12	0	4418800	0	0
P58044	P58044	Isopentenyl-diphosphate Delta-isomerase 1	Idi1	0.921457	-0.118012	NaN	2	-0.600766	0.364742	NaN	682010	449720	4911500	6324300	NaN	124610	3	3	3	13.2	13.2	13.2	26.289	0	200.09	8575100	12	2	2	1	2	3	1	612510	0	0
Q8VDM4	Q8VDM4	26S proteasome non-ATPase regulatory subunit 2	Psmd2	0.976738	-0.033956	NaN	2	-0.178982	0.11107	NaN	2315000	2044900	51319000	55426000	NaN	NaN	8	8	8	11.6	11.6	11.6	100.2	0	34.407	224780000	23	3	8	0	4	8	0	3943600	0	0
Q61292	Q61292	Laminin subunit beta-2	Lamb2	0.92719	-0.109063	NaN	2	-0.649844	0.431718	NaN	479580	305660	9854400	13292000	NaN	NaN	11	11	10	8.3	8.3	8	196.58	0	146.71	18498000	19	4	8	0	4	9	0	172880	0	0
O09131;Q8K2Q2	O09131;Q8K2Q2	Glutathione S-transferase omega-1;Glutathione S-transferase omega-2	Gsto1;Gsto2	0.953424	-0.0688103	NaN	2	0.314662	-0.452283	NaN	841990	1047200	14544000	10630000	NaN	NaN	4	4	4	10	10	10	27.497	0	4.4684	10978000	10	2	3	0	2	2	0	645760	0	0
Q6IRU2	Q6IRU2	Tropomyosin alpha-4 chain	Tpm4	0.978168	-0.0318452	NaN	2	-0.213788	0.150097	NaN	41429000	35723000	72799000	80781000	1395000	NaN	21	19	19	70.6	66.1	66.1	28.467	0	95.791	232940000	76	17	8	1	17	6	1	11647000	0	0
Q9Z1Q5	Q9Z1Q5	Chloride intracellular channel protein 1	Clic1	1.0486	0.0684669	NaN	2	-0.330982	0.467916	NaN	10210000	8116900	49461000	68410000	139020	NaN	10	10	10	39.4	39.4	39.4	27.013	0	90.3	97379000	49	9	8	1	9	6	1	5728200	0	0
Q9QZJ6	Q9QZJ6	Microfibrillar-associated protein 5	Mfap5	1.01813	0.0259227	NaN	2	-0.127017	0.178862	NaN	1061500	972040	29843000	33782000	295360	NaN	3	3	3	23.2	23.2	23.2	18.538	0	5.7439	19326000	14	2	3	1	2	3	0	2147300	0	0
Q8R001	Q8R001	Microtubule-associated protein RP/EB family member 2	Mapre2	0.948837	-0.0757683	NaN	2	-0.54481	0.393273	NaN	4019800	2755500	33561000	44078000	NaN	NaN	5	5	5	22.7	22.7	22.7	36.946	0	35.511	63151000	23	3	4	0	3	4	0	3323700	0	0
O89051	O89051	Integral membrane protein 2B;BRI2, membrane form;BRI2 intracellular domain;BRI2C, soluble form;Bri23 peptide	Itm2b	0.932587	-0.10069	NaN	2	0.524052	-0.725432	NaN	1036100	1489900	11358000	6869500	NaN	NaN	3	3	3	14.3	14.3	14.3	30.26	0	5.5704	8848700	11	3	2	0	3	2	0	632050	0	0
P27773	P27773	Protein disulfide-isomerase A3	Pdia3	1.10078	0.138528	NaN	2	-0.819226	1.09628	NaN	962530	545510	6837600	14619000	NaN	NaN	6	6	6	13.1	13.1	13.1	56.678	0	9.1001	11480000	8	3	3	0	3	2	0	318900	0	0
P21275	P21275	Bone morphogenetic protein 4	Bmp4	1.09117	0.125871	NaN	2	NaN	1.06256	-0.810814	NaN	503470	15582000	32545000	139280	79398	7	7	7	28.7	28.7	28.7	46.496	0	44.292	45994000	18	1	5	2	3	6	2	2190200	0	0
Q9DBH5	Q9DBH5	Vesicular integral-membrane protein VIP36	Lman2	0.980695	-0.0281237	NaN	2	-0.239837	0.18359	NaN	13770000	11661000	39755000	45150000	NaN	27068	6	6	6	21.8	21.8	21.8	40.429	0	67.265	107200000	35	6	5	0	5	6	1	4660800	0	0
P70665	P70665	Sialate O-acetylesterase;Sialate O-acetylesterase small subunit;Sialate O-acetylesterase large subunit	Siae	1.00621	0.00893259	NaN	2	0.081958	-0.0640928	NaN	1240300	1312800	157410000	150570000	974100	NaN	8	8	8	22.6	22.6	22.6	60.775	0	89.216	152530000	26	4	8	2	5	8	2	4486100	0	0
Q9JLL0	Q9JLL0	Cysteine-rich motor neuron 1 protein	Crim1	1.04752	0.0669783	NaN	2	-0.613888	0.747844	NaN	1064500	695580	43758000	73482000	NaN	NaN	12	12	12	14.9	14.9	14.9	114.07	0	48.897	74155000	27	4	7	0	9	11	0	1483100	0	0
Q9JKR6	Q9JKR6	Hypoxia up-regulated protein 1	Hyou1	1.02833	0.0402988	NaN	2	-0.37769	0.458288	NaN	1440100	1108400	102110000	140290000	NaN	1015500	24	24	24	25.3	25.3	25.3	111.18	0	168.06	138790000	63	9	18	1	13	18	3	2523400	0	0
A2AVA0	A2AVA0	Sushi, von Willebrand factor type A, EGF and pentraxin domain-containing protein 1	Svep1	1.01782	0.0254846	NaN	2	-0.23967	0.29064	NaN	3459400	2929900	739350000	904360000	NaN	NaN	52	52	52	18.2	18.2	18.2	387.45	0	257.62	752650000	173	14	51	0	19	48	0	4561500	0	0
Q8CDN6	Q8CDN6	Thioredoxin-like protein 1	Txnl1	1.02984	0.0424187	NaN	2	0.497303	-0.412466	NaN	495490	699420	14385000	10808000	NaN	NaN	5	5	5	24.9	24.9	24.9	32.237	0	13.843	22252000	14	2	5	0	2	5	0	1483500	0	0
Q8CFG8	Q8CFG8	Complement C1s-B subcomponent;Complement C1s-B subcomponent heavy chain;Complement C1s-B subcomponent light chain	C1sb	1.04692	0.0661576	NaN	2	-0.755482	0.887798	NaN	735260	435530	9761400	18062000	NaN	519240	13	2	2	19.6	4.1	4.1	76.699	0	90.94	13679000	13	2	1	1	2	1	1	488520	0	0
Q8VCR7	Q8VCR7	Alpha/beta hydrolase domain-containing protein 14B	Abhd14b	1.02904	0.0413012	NaN	2	0.60191	-0.519308	NaN	2925300	4439800	65754000	45877000	969940	NaN	2	2	2	10	10	10	22.45	0	5.5538	63229000	20	2	2	1	2	2	1	4863800	0	0
P18572	P18572	Basigin	Bsg	1.00553	0.00795899	NaN	2	0.138364	-0.122446	NaN	2575100	2834300	10677000	9808200	NaN	NaN	3	3	3	10.5	10.5	10.5	42.444	0	50.086	57025000	14	3	2	0	3	2	0	2851300	0	0
O89023	O89023	Tripeptidyl-peptidase 1	Tpp1	1.01183	0.0169675	NaN	2	0.321008	NaN	-0.287073	558180	697280	NaN	NaN	269790	221110	2	2	2	6.4	6.4	6.4	61.341	0	7.2195	10030000	8	2	0	2	2	0	2	417900	0	0
Q9Z2U1	Q9Z2U1	Proteasome subunit alpha type-5	Psma5	0.996927	-0.00443973	NaN	2	0.124171	-0.133051	NaN	12561000	13690000	7068200	6445500	NaN	NaN	10	10	10	51.9	51.9	51.9	26.411	0	73.345	49391000	21	9	2	0	10	2	0	4115900	0	0
Q9Z1R3	Q9Z1R3	Apolipoprotein M	Apom	0.988683	-0.0164206	NaN	2	-0.53408	NaN	0.501239	3303800	2281600	NaN	NaN	274680	388790	4	4	4	14.7	14.7	14.7	21.273	0	83.443	19249000	22	1	0	4	1	0	2	2138700	0	0
P35802	P35802	Neuronal membrane glycoprotein M6-a	Gpm6a	0.990414	-0.0138965	NaN	2	-0.503862	0.476069	NaN	12691000	8949900	44878000	62423000	NaN	56463	5	5	5	14.7	14.7	14.7	31.149	0	14.634	101070000	43	5	4	1	5	4	1	10107000	0	0
P97333	P97333	Neuropilin-1	Nrp1	0.99308	-0.0100175	NaN	2	0.542408	-0.562443	NaN	912180	1328500	42652000	28882000	NaN	NaN	5	5	5	8.3	8.3	8.3	103	0	96.625	37016000	25	3	4	0	3	5	0	841280	0	0
Q5SX40;Q8BVF4	Q5SX40	Myosin-1	Myh1	0.00553543	-7.49709	NaN	1	NaN	-7.49709	NaN	NaN	NaN	664700000	3679400	NaN	NaN	82	82	16	35	35	7.5	223.34	0	323.31	390230000	31	0	16	0	0	3	0	3072700	0	0
Q91Z83;Q02566	Q91Z83;Q02566	Myosin-7;Myosin-6	Myh7;Myh6	0.0436573	-4.51763	NaN	1	NaN	-4.51763	NaN	NaN	NaN	176960000	7725600	NaN	NaN	18	3	3	9.4	1.2	1.2	222.88	0	74.938	106620000	5	0	3	0	0	2	0	852980	0	0
P84228;P84244;P68433;P02301	P84228;P84244;P68433;P02301	Histone H3.2;Histone H3.3;Histone H3.1;Histone H3.3C	Hist1h3b;H3f3a;Hist1h3a;H3f3c	0.0749787	-3.73737	NaN	1	NaN	NaN	-3.73737	689180	NaN	2188700	NaN	7528800	564500	9	9	9	63.2	63.2	63.2	15.388	0	15.711	38745000	23	2	1	8	0	1	2	6457500	0	0
P43276	P43276	Histone H1.5	Hist1h1b	0.135479	-2.88386	NaN	1	NaN	NaN	-2.88386	NaN	NaN	NaN	NaN	5181400	701970	8	8	6	26.5	26.5	15.7	22.576	0	86.732	10307000	21	0	0	6	0	0	6	1030700	0	0
A2ASS6	A2ASS6	Titin	Ttn	0.144768	-2.78818	NaN	1	NaN	-2.78818	NaN	NaN	2749700	26644000	3857200	3474800	NaN	19	19	19	0.8	0.8	0.8	3906.4	0	66.379	67608000	26	1	18	1	1	2	1	28757	0	0
P15864;Q07133	P15864	Histone H1.2	Hist1h1c	0.145332	-2.78258	NaN	1	NaN	NaN	-2.78258	NaN	NaN	NaN	NaN	2649800	385100	8	3	3	29.2	9.9	9.9	21.266	0	17.971	5040000	6	0	0	3	0	0	3	458180	0	0
P43277	P43277	Histone H1.3	Hist1h1d	0.185858	-2.42773	NaN	1	NaN	NaN	-2.42773	NaN	NaN	NaN	NaN	1658200	308190	8	6	2	33.5	22.6	9.5	22.099	0	11.761	3338500	7	0	0	2	0	0	2	278210	0	0
P43274	P43274	Histone H1.4	Hist1h1e	0.205819	-2.28055	NaN	1	NaN	NaN	-2.28055	NaN	NaN	NaN	NaN	1185700	244040	6	3	3	27.4	9.6	9.6	21.977	0	12.518	1949100	8	0	0	3	0	0	2	162420	0	0
Q8VE99	Q8VE99	Coiled-coil domain-containing protein 115	Ccdc115	0.317731	-1.65412	NaN	1	NaN	-1.65412	NaN	NaN	34287	23575000	7490500	NaN	NaN	2	2	2	16.7	16.7	16.7	19.742	0.0098214	2.2111	23169000	3	0	2	0	1	2	0	1544600	0	0
P04223;P14431;P14430;P14428;P14429;P06339;P01899;P01897;P01900;P14427;P03991;P01901	P04223	H-2 class I histocompatibility antigen, K-K alpha chain	H2-K1	0.34535	-1.53387	NaN	1	NaN	-1.53387	NaN	NaN	NaN	3875200	1338300	NaN	NaN	3	3	2	8.1	8.1	5.7	41.646	0	15.187	5760800	2	0	2	0	0	2	0	288040	0	0
P43406	P43406	Integrin alpha-V;Integrin alpha-V heavy chain;Integrin alpha-V light chain	Itgav	0.365237	-1.45309	NaN	1	-1.45309	NaN	NaN	372470	136040	NaN	NaN	NaN	NaN	3	3	3	2.8	2.8	2.8	115.36	0	4.8443	1870700	3	2	0	0	3	0	0	30667	0	0
P99024;Q9CWF2;Q7TMM9;Q9ERD7	P99024;Q9CWF2;Q7TMM9;Q9ERD7	Tubulin beta-5 chain;Tubulin beta-2B chain;Tubulin beta-2A chain;Tubulin beta-3 chain	Tubb5;Tubb2b;Tubb2a;Tubb3	0.471423	-1.08491	NaN	1	NaN	NaN	-1.08491	NaN	176200	4882300	NaN	485360	228810	6	5	2	18	15.8	6.8	49.67	0	15.444	17740000	10	1	1	2	1	1	2	806360	0	0
P17047	P17047	Lysosome-associated membrane glycoprotein 2	Lamp2	0.500974	-0.997193	NaN	1	-0.997193	NaN	NaN	1910200	956960	NaN	28513000	NaN	NaN	3	3	3	5.8	5.8	5.8	45.681	0	7.9932	23665000	13	2	1	0	3	1	0	1075700	0	0
E9PVD3	E9PVD3	Protocadherin-16	Dchs1	0.507371	-0.978888	NaN	1	NaN	-0.978888	NaN	NaN	4544700	217080000	110140000	NaN	7865200	1	1	1	0.4	0.4	0.4	346.38	0.0099278	2.2686	673830000	38	1	1	1	1	1	1	5478300	0	0
Q9ERK4	Q9ERK4	Exportin-2	Cse1l	0.515981	-0.954609	NaN	1	NaN	-0.954609	NaN	NaN	105520	9933500	5125500	NaN	NaN	4	4	4	5.9	5.9	5.9	110.45	0	29.98	4981500	6	1	3	0	1	4	0	88956	0	0
Q61495;Q7TSF1;Q7TSF0	Q61495;Q7TSF1	Desmoglein-1-alpha;Desmoglein-1-beta	Dsg1a;Dsg1b	0.529207	-0.918095	NaN	1	NaN	-0.918095	NaN	NaN	528690	43414000	22975000	33219	NaN	3	3	3	2.5	2.5	2.5	114.6	0	13.289	30228000	21	0	3	1	2	3	0	671740	0	0
Q810C0	Q810C0	SLIT and NTRK-like protein 2	Slitrk2	0.533714	-0.905861	NaN	1	NaN	-0.905861	NaN	NaN	NaN	6004900	3204900	NaN	NaN	2	2	2	3.8	3.8	3.8	95.435	0	38.886	3884100	3	0	2	0	1	2	0	88276	0	0
P20352	P20352	Tissue factor	F3	0.534926	-0.902589	NaN	1	-0.902589	NaN	NaN	1475700	789390	NaN	NaN	NaN	NaN	3	3	3	14.6	14.6	14.6	32.935	0	15.747	14378000	12	3	0	0	2	0	0	798800	0	0
Q920C1	Q920C1	Chordin-like protein 1	Chrdl1	0.547651	-0.868672	NaN	1	NaN	NaN	-0.868672	NaN	218410	NaN	845220	975220	534080	3	3	3	8.1	8.1	8.1	50.731	0	21.684	14309000	10	0	1	3	1	1	3	572370	0	0
Q62181	Q62181	Semaphorin-3C	Sema3c	0.553081	-0.854437	NaN	1	NaN	-0.854437	NaN	NaN	44514	10224000	5654700	NaN	NaN	2	2	2	2.9	2.9	2.9	85.288	0	5.3546	3696800	3	0	2	0	1	2	0	78655	0	0
Q01705	Q01705	Neurogenic locus notch homolog protein 1;Notch 1 extracellular truncation;Notch 1 intracellular domain	Notch1	0.5782	-0.790361	NaN	1	NaN	-0.790361	NaN	NaN	NaN	2998100	1733500	NaN	NaN	2	2	2	1.1	1.1	1.1	270.83	0	17.13	3288000	2	0	2	0	0	2	0	38232	0	0
Q7TSK2	Q7TSK2	Seizure protein 6	Sez6	0.590952	-0.758886	NaN	1	NaN	-0.758886	NaN	NaN	75871	4310500	2547300	660460	NaN	3	3	3	3.6	3.6	3.6	107.43	0	4.0974	7042200	6	1	2	2	1	2	0	171760	0	0
Q91XY4	Q91XY4	Protocadherin gamma-A4	Pcdhga4	0.595344	-0.748206	NaN	1	NaN	-0.748206	NaN	NaN	528790	27317000	16263000	NaN	NaN	4	4	4	6.9	6.9	6.9	100.36	0	29.899	14578000	10	1	3	0	1	4	0	502700	0	0
Q9WU60	Q9WU60	Attractin	Atrn	0.608741	-0.716099	NaN	1	NaN	-0.716099	NaN	NaN	NaN	6484200	3947200	NaN	95915	3	3	3	2.9	2.9	2.9	158.06	0	42.825	4572500	4	1	2	1	0	2	1	65322	0	0
Q8CHK4	Q8CHK4	Histone acetyltransferase KAT5	Kat5	0.615493	-0.700186	NaN	1	NaN	NaN	-0.700186	NaN	NaN	6779600	NaN	1223800	753240	1	1	1	3.3	3.3	3.3	58.597	0.0037915	2.7241	10407000	5	0	1	1	0	0	1	325220	0	0
P70232	P70232	Neural cell adhesion molecule L1-like protein;Processed neural cell adhesion molecule L1-like protein	Chl1	0.616684	-0.697396	NaN	1	NaN	-0.697396	NaN	NaN	NaN	18700000	11532000	NaN	NaN	5	5	5	6.9	6.9	6.9	135.07	0	14.755	16985000	10	0	5	0	0	4	0	273950	0	0
Q61838	Q61838	Alpha-2-macroglobulin;Alpha-2-macroglobulin 165 kDa subunit;Alpha-2-macroglobulin 35 kDa subunit	A2m	0.620804	-0.687791	NaN	1	NaN	NaN	-0.687791	NaN	693380	NaN	10629000	18468000	11465000	4	2	2	1.8	1.3	1.3	165.85	0	3.1948	118440000	15	1	1	2	1	1	2	1668200	0	0
P97823	P97823	Acyl-protein thioesterase 1	Lypla1	0.62734	-0.67268	NaN	1	NaN	-0.67268	NaN	NaN	NaN	19495000	12230000	NaN	NaN	2	2	2	6.5	6.5	6.5	24.687	0	3.9967	6602000	2	0	2	0	0	2	0	550170	0	0
P68040	P68040	Guanine nucleotide-binding protein subunit beta-2-like 1;Guanine nucleotide-binding protein subunit beta-2-like 1, N-terminally processed	Gnb2l1	0.630006	-0.666562	NaN	1	-0.666562	NaN	NaN	487630	307210	NaN	1545500	NaN	NaN	2	2	2	8.8	8.8	8.8	35.076	0	11.833	2324600	4	2	1	0	2	1	0	105670	0	0
P09056	P09056	Leukemia inhibitory factor	Lif	0.631403	-0.663366	NaN	1	-0.663366	NaN	NaN	1918900	1211600	NaN	1985700	NaN	NaN	2	2	2	14.3	14.3	14.3	22.287	0	3.1967	19373000	5	2	1	0	2	1	0	1614400	0	0
Q9D1D6	Q9D1D6	Collagen triple helix repeat-containing protein 1	Cthrc1	0.631835	-0.662381	NaN	1	-0.662381	NaN	NaN	9058700	5723600	30575000	NaN	NaN	NaN	3	3	3	12.7	12.7	12.7	26.46	0	5.0539	51359000	8	3	1	0	3	2	0	4279900	0	0
Q99JY8	Q99JY8	Lipid phosphate phosphohydrolase 3	Ppap2b	0.655738	-0.608809	NaN	1	-0.608809	NaN	NaN	2433900	1596000	NaN	2866500	NaN	NaN	3	3	3	14.4	14.4	14.4	35.216	0	21.648	9866200	12	3	1	0	3	1	0	704730	0	0
P12265	P12265	Beta-glucuronidase	Gusb	0.671719	-0.57407	NaN	1	NaN	NaN	-0.57407	NaN	144010	NaN	NaN	1873700	1258600	3	3	3	5.7	5.7	5.7	74.194	0	7.3721	19571000	11	1	0	3	1	0	3	543650	0	0
Q8R1F1	Q8R1F1	Niban-like protein 1	Fam129b	0.702439	-0.509555	NaN	1	NaN	-0.509555	NaN	NaN	NaN	4087900	2871500	NaN	NaN	2	2	2	3.2	3.2	3.2	84.818	0	5.8726	2026700	3	0	2	0	0	2	0	44058	0	0
Q8BH61;P49222	Q8BH61	Coagulation factor XIII A chain	F13a1	0.706302	-0.501642	NaN	1	NaN	-0.501642	NaN	NaN	321070	17787000	12563000	NaN	NaN	3	3	3	3.8	3.8	3.8	83.206	0	4.8569	30883000	6	1	2	0	1	3	0	772080	0	0
P05622	P05622	Platelet-derived growth factor receptor beta	Pdgfrb	0.712228	-0.489588	NaN	1	NaN	-0.489588	NaN	NaN	196200	19373000	13798000	NaN	NaN	5	5	5	5.5	5.5	5.5	122.8	0	6.8344	11638000	10	1	4	0	2	4	0	247610	0	0
Q05920	Q05920	Pyruvate carboxylase, mitochondrial	Pc	0.712497	-0.489043	NaN	1	NaN	-0.489043	NaN	NaN	NaN	4985000	3551800	NaN	NaN	2	2	2	2	2	2	129.68	0	8.6187	3074800	3	0	2	0	0	2	0	47304	0	0
O09118	O09118	Netrin-1	Ntn1	0.712892	-0.488245	NaN	1	-0.488245	NaN	NaN	622170	443540	NaN	NaN	NaN	NaN	1	1	1	2.6	2.6	2.6	67.81	0	41.297	5647800	7	1	0	0	1	0	0	156880	0	0
P48678	P48678	Prelamin-A/C;Lamin-A/C	Lmna	0.713801	-0.486406	NaN	1	NaN	-0.486406	NaN	NaN	NaN	6896600	4922800	NaN	NaN	3	3	3	6.8	6.8	6.8	74.237	0	64.57	10112000	4	0	3	0	0	3	0	219830	0	0
Q99K41	Q99K41	EMILIN-1	Emilin1	0.718207	-0.477529	NaN	1	NaN	-0.477529	NaN	NaN	39452	31988000	22974000	NaN	NaN	7	7	7	12.9	12.9	12.9	107.58	0	23.75	21905000	17	0	7	0	1	7	0	377670	0	0
Q8K183	Q8K183	Pyridoxal kinase	Pdxk	0.728565	-0.456871	NaN	1	NaN	-0.456871	NaN	NaN	NaN	8669100	6316000	NaN	NaN	3	3	3	17.3	17.3	17.3	35.015	0	3.5758	7706500	4	0	3	0	0	2	0	453320	0	0
Q05186	Q05186	Reticulocalbin-1	Rcn1	0.731604	-0.450865	NaN	1	-0.450865	NaN	NaN	459210	335960	NaN	NaN	NaN	NaN	2	2	2	7.7	7.7	7.7	38.113	0	10.275	4060900	3	2	0	0	2	0	0	253810	0	0
P17710	P17710	Hexokinase-1	Hk1	0.731666	-0.450743	NaN	1	NaN	-0.450743	NaN	NaN	45202	40662000	29751000	NaN	NaN	9	9	8	12.5	12.5	11.4	108.3	0	102.4	17676000	16	0	8	0	1	8	0	310110	0	0
P10404	P10404	MLV-related proviral Env polyprotein;Surface protein;Transmembrane protein		0.736201	-0.441828	NaN	1	NaN	NaN	-0.441828	NaN	NaN	NaN	NaN	555310	408820	4	4	4	6.6	6.6	6.6	69.612	0	7.5763	15143000	5	0	0	4	0	0	4	473210	0	0
Q9EQH3	Q9EQH3	Vacuolar protein sorting-associated protein 35	Vps35	0.747676	-0.419516	NaN	1	NaN	-0.419516	NaN	NaN	48310000	18714000	13992000	NaN	NaN	6	6	6	11.8	11.8	11.8	91.712	0	19.315	1229700000	8	1	5	0	1	4	0	25618000	0	0
Q9ESN4;Q8CFR0	Q9ESN4	Complement C1q-like protein 3	C1ql3	0.761525	-0.393036	NaN	1	NaN	-0.393036	NaN	2867300	NaN	27982000	21309000	NaN	NaN	6	6	5	26.7	26.7	21.6	26.687	0	10.304	40096000	15	2	3	0	2	4	0	3084300	0	0
Q9R1E6	Q9R1E6	Ectonucleotide pyrophosphatase/phosphodiesterase family member 2	Enpp2	0.764307	-0.387776	NaN	1	NaN	-0.387776	NaN	NaN	NaN	22839000	17456000	NaN	NaN	5	5	5	7.3	7.3	7.3	98.884	0	5.1402	9926300	6	0	5	0	0	5	0	190890	0	0
O70281	O70281	Protein-tyrosine sulfotransferase 1	Tpst1	0.769714	-0.377606	NaN	1	-0.377606	NaN	NaN	673380	518310	894430	NaN	NaN	NaN	3	3	3	9.7	9.7	9.7	42.132	0	4.1045	7049700	5	3	1	0	3	0	0	271140	0	0
Q61490	Q61490	CD166 antigen	Alcam	0.774501	-0.368661	NaN	1	NaN	-0.368661	NaN	NaN	NaN	7449700	5769800	NaN	NaN	3	3	3	6.9	6.9	6.9	65.091	0	6.6467	3797700	4	0	3	0	0	2	0	115080	0	0
O88958	O88958	Glucosamine-6-phosphate isomerase 1	Gnpda1	0.780406	-0.357704	NaN	1	-0.357704	NaN	NaN	1251900	976990	NaN	2627400	NaN	NaN	3	3	3	15.9	15.9	15.9	32.549	0	9.0523	5675600	8	2	1	0	3	1	0	333860	0	0
P50429	P50429	Arylsulfatase B	Arsb	0.784773	-0.349652	NaN	1	-0.349652	NaN	NaN	994950	780810	NaN	4125000	NaN	310880	2	2	2	4.3	4.3	4.3	59.646	0	5.812	26719000	10	2	1	1	2	1	1	954260	0	0
Q61166	Q61166	Microtubule-associated protein RP/EB family member 1	Mapre1	0.78718	-0.345235	NaN	1	NaN	-0.345235	NaN	NaN	NaN	4790900	3771300	NaN	NaN	2	2	2	11.2	11.2	11.2	30.016	0	7.2086	3991800	3	0	2	0	0	2	0	210100	0	0
Q62283	Q62283	Tetraspanin-7	Tspan7	0.803798	-0.315095	NaN	1	-0.315095	NaN	NaN	1811400	1456000	NaN	1166800	NaN	8397.1	2	2	2	9.6	9.6	9.6	27.544	0	33.493	15031000	6	1	1	1	1	1	1	2147300	0	0
Q3TXS7	Q3TXS7	26S proteasome non-ATPase regulatory subunit 1	Psmd1	0.807892	-0.307765	NaN	1	NaN	-0.307765	NaN	NaN	181350	22097000	17852000	NaN	NaN	7	7	7	10.9	10.9	10.9	105.73	0	26.697	10506000	12	1	5	0	2	6	0	206000	0	0
Q9R0P9	Q9R0P9	Ubiquitin carboxyl-terminal hydrolase isozyme L1	Uchl1	0.812594	-0.299393	NaN	1	NaN	-0.299393	NaN	NaN	946260	23884000	19408000	NaN	NaN	7	7	7	52	52	52	24.838	0	89.587	12318000	14	1	4	0	3	3	0	947550	0	0
O88668	O88668	Protein CREG1	Creg1	0.813713	-0.297408	NaN	1	NaN	NaN	-0.297408	NaN	800060	NaN	NaN	814980	663160	2	2	2	9.5	9.5	9.5	24.452	0	121.97	22017000	10	1	0	1	1	0	1	2001500	0	0
Q00724	Q00724	Retinol-binding protein 4	Rbp4	0.816941	-0.291697	NaN	1	NaN	-0.291697	NaN	NaN	NaN	12963000	10590000	NaN	NaN	2	2	2	4.5	4.5	4.5	23.206	0.0095652	2.0707	6168900	2	0	2	0	0	2	0	560810	0	0
Q8CG03	Q8CG03	cGMP-specific 3,5-cyclic phosphodiesterase	Pde5a	0.820872	-0.284771	NaN	1	NaN	-0.284771	NaN	NaN	NaN	35684000	29292000	NaN	NaN	5	5	5	7.6	7.6	7.6	98.406	0	80.199	18941000	14	0	5	0	1	4	0	364260	0	0
Q8BFS6	Q8BFS6	Serine/threonine-protein phosphatase CPPED1	Cpped1	0.834433	-0.261132	NaN	1	-0.261132	NaN	NaN	648620	541230	NaN	6773500	NaN	7913.3	2	2	2	7.1	7.1	7.1	35.247	0	5.6107	11428000	8	2	1	1	2	1	1	879050	0	0
Q8R366	Q8R366	Immunoglobulin superfamily member 8	Igsf8	0.835492	-0.259302	NaN	1	-0.259302	NaN	NaN	1343400	1122400	NaN	6475100	NaN	NaN	4	4	4	7.4	7.4	7.4	65.01	0	8.5284	15937000	10	3	1	0	4	2	0	531220	0	0
P13707	P13707	Glycerol-3-phosphate dehydrogenase [NAD(+)], cytoplasmic	Gpd1	0.842729	-0.246859	NaN	1	-0.246859	NaN	NaN	895970	755060	4034600	NaN	NaN	NaN	2	2	2	6.6	6.6	6.6	37.572	0	7.3555	5437400	7	2	2	0	2	0	0	209130	0	0
P55284	P55284	Cadherin-5	Cdh5	0.845978	-0.241308	NaN	1	NaN	-0.241308	NaN	NaN	106800	209710000	177410000	NaN	NaN	14	14	14	25.6	25.6	25.6	87.902	0	223	179890000	33	1	14	0	1	13	0	4734000	0	0
Q61824	Q61824	Disintegrin and metalloproteinase domain-containing protein 12	Adam12	0.848959	-0.236233	NaN	1	NaN	-0.236233	NaN	NaN	NaN	6888200	5847800	NaN	NaN	2	2	2	3.7	3.7	3.7	98.503	0.0028544	2.7836	12367000	4	0	2	0	0	2	0	233340	0	0
Q61730	Q61730	Interleukin-1 receptor accessory protein	Il1rap	0.849249	-0.235741	NaN	1	NaN	-0.235741	NaN	NaN	NaN	23562000	20010000	NaN	198510	4	4	4	4.4	4.4	4.4	65.74	0	5.2463	67501000	12	0	4	1	0	4	1	1824300	0	0
P34022	P34022	Ran-specific GTPase-activating protein	Ranbp1	0.853525	-0.228495	NaN	1	-0.228495	NaN	NaN	2222900	1897300	NaN	6393700	433680	NaN	4	4	4	25.6	25.6	25.6	23.596	0	5.9762	16579000	9	3	2	1	3	1	0	1507200	0	0
Q6P5F9	Q6P5F9	Exportin-1	Xpo1	0.856188	-0.224	NaN	1	NaN	-0.224	NaN	NaN	NaN	37417000	32036000	NaN	NaN	8	8	8	11.9	11.9	11.9	123.09	0	78.114	17175000	17	0	8	0	0	8	0	296110	0	0
Q8R0Y6;Q8K009	Q8R0Y6	Cytosolic 10-formyltetrahydrofolate dehydrogenase	Aldh1l1	0.860726	-0.216374	NaN	1	NaN	-0.216374	NaN	NaN	NaN	23443000	20178000	NaN	NaN	8	8	8	14.5	14.5	14.5	98.708	0	44.493	12721000	10	0	7	0	0	7	0	198760	0	0
P28828	P28828	Receptor-type tyrosine-protein phosphatase mu	Ptprm	0.868745	-0.202995	NaN	1	NaN	-0.202995	NaN	NaN	611910	41210000	35801000	NaN	NaN	5	5	5	6.2	6.2	6.2	163.65	0	59.453	22173000	13	1	3	0	1	5	0	291750	0	0
Q8BGQ7	Q8BGQ7	Alanine--tRNA ligase, cytoplasmic	Aars	0.874194	-0.193975	NaN	1	NaN	-0.193975	NaN	NaN	237450	12869000	11250000	NaN	NaN	4	4	4	5	5	5	106.91	0	6.9803	6688600	7	1	4	0	1	4	0	113370	0	0
O09061	O09061	Proteasome subunit beta type-1	Psmb1	0.875203	-0.19231	NaN	1	-0.19231	NaN	NaN	319480	279610	5649200	NaN	NaN	NaN	2	2	2	14.2	14.2	14.2	26.372	0	31.908	3250000	5	2	1	0	2	0	0	232140	0	0
Q3TRM8	Q3TRM8	Hexokinase-3	Hk3	0.876174	-0.190711	NaN	1	NaN	-0.190711	NaN	NaN	NaN	23638000	20711000	NaN	NaN	5	5	5	7.9	7.9	7.9	100.1	0	14.233	28690000	6	0	4	0	0	4	0	562560	0	0
B0F2B4	B0F2B4	Neuroligin 4-like	Nlgn4l	0.876417	-0.19031	NaN	1	NaN	-0.19031	NaN	450750	NaN	26986000	23651000	NaN	NaN	5	3	3	8.6	5.6	5.6	97.347	0	22.3	15543000	11	2	3	0	1	3	0	535970	0	0
Q5FW85	Q5FW85	Extracellular matrix protein 2	Ecm2	0.881349	-0.182215	NaN	1	NaN	-0.182215	NaN	NaN	524980	19157000	16884000	NaN	NaN	5	5	5	11.6	11.6	11.6	76.675	0	11.574	10281000	9	1	5	0	2	3	0	311550	0	0
Q9JMK0	Q9JMK0	Beta-1,4-galactosyltransferase 5	B4galt5	0.886176	-0.174334	NaN	1	NaN	-0.174334	NaN	NaN	3222700	4927800	4366900	NaN	24958	2	2	2	5.2	5.2	5.2	44.814	0	3.479	38957000	5	1	2	0	1	2	1	2050400	0	0
Q80T21	Q80T21	ADAMTS-like protein 4	Adamtsl4	0.890222	-0.167764	NaN	1	NaN	NaN	-0.167764	NaN	219640	NaN	2852600	386870	344400	6	6	6	7.2	7.2	7.2	113.22	0	117.58	7592000	12	1	2	2	3	2	2	118620	0	0
Q8R4Y4	Q8R4Y4	Stabilin-1	Stab1	0.893954	-0.161727	NaN	1	NaN	NaN	-0.161727	NaN	102520	NaN	573030	1210800	1082400	8	8	8	3.9	3.9	3.9	276.25	0	244.28	9138900	15	0	1	4	1	1	5	75528	0	0
P39038	P39038	Cadherin-4	Cdh4	0.89686	-0.157045	NaN	1	-0.157045	NaN	NaN	732500	656950	1292200	NaN	20987	NaN	4	4	4	7	7	7	100.03	0	14.448	4814700	9	3	1	1	4	0	0	130130	0	0
Q6PHU5	Q6PHU5	Sortilin	Sort1	0.900565	-0.151098	NaN	1	NaN	-0.151098	NaN	NaN	376920	14874000	13395000	NaN	8539100	3	3	3	3.8	3.8	3.8	91.199	0	4.5724	80574000	19	1	2	1	1	2	1	1918400	0	0
Q9CPU0	Q9CPU0	Lactoylglutathione lyase	Glo1	0.901798	-0.149123	NaN	1	-0.149123	NaN	NaN	962000	867530	NaN	4867100	NaN	NaN	4	4	4	14.7	14.7	14.7	20.809	0	5.7919	8773300	4	2	1	0	3	1	0	797580	0	0
Q6PCX7	Q6PCX7	Repulsive guidance molecule A	Rgma	0.907132	-0.140616	NaN	1	NaN	-0.140616	NaN	320530	NaN	7572000	6868800	NaN	NaN	3	3	3	7.5	7.5	7.5	49.675	0	8.0593	10130000	8	1	3	0	2	3	0	405210	0	0
Q9WUL7	Q9WUL7	ADP-ribosylation factor-like protein 3	Arl3	0.907344	-0.140279	NaN	1	-0.140279	NaN	NaN	720730	653950	NaN	2702800	NaN	NaN	2	2	2	16.5	16.5	16.5	20.486	0	4.7272	6306900	6	2	1	0	2	1	0	573350	0	0
Q9QXX0	Q9QXX0	Protein jagged-1	Jag1	0.913604	-0.130359	NaN	1	NaN	-0.130359	NaN	NaN	84378	11019000	10067000	NaN	NaN	6	6	6	6.6	6.6	6.6	134.16	0	5.2073	11446000	7	1	5	0	1	4	0	190760	0	0
P16015	P16015	Carbonic anhydrase 3	Ca3	0.915316	-0.127658	NaN	1	-0.127658	NaN	NaN	565870	517950	5401900	NaN	NaN	NaN	3	3	3	10.8	10.8	10.8	29.366	0	6.4082	4839500	4	2	1	0	2	0	0	302470	0	0
Q2VWQ2	Q2VWQ2	Protein kinase C-binding protein NELL1	Nell1	0.926331	-0.1104	NaN	1	-0.1104	NaN	NaN	177280	164220	NaN	NaN	NaN	NaN	4	4	4	6	6	6	89.414	0	18.582	3375000	7	2	0	0	4	0	0	68878	0	0
Q6NSU3	Q6NSU3	Glycosyltransferase 8 domain-containing protein 1	Glt8d1	0.930714	-0.103591	NaN	1	NaN	-0.103591	NaN	NaN	472090	2837500	2640900	NaN	45430	3	3	3	15.4	15.4	15.4	41.99	0	7.3994	12225000	7	1	2	1	1	2	1	531540	0	0
Q61220	Q61220	Protein kinase C-binding protein NELL2	Nell2	0.931849	-0.101832	NaN	1	NaN	-0.101832	NaN	NaN	657330	126190000	117590000	NaN	116030	8	8	8	11.6	11.6	11.6	91.431	0	18.137	170690000	20	2	8	1	2	8	1	4163200	0	0
Q9D2L1	Q9D2L1	Arylsulfatase K	Arsk	0.935577	-0.0960717	NaN	1	NaN	-0.0960717	NaN	NaN	294550	11083000	10369000	NaN	NaN	2	2	2	4.7	4.7	4.7	62.8	0.00096993	3.037	13475000	4	1	2	0	1	2	0	481260	0	0
Q8VHR0	Q8VHR0	Protocadherin 18	Pcdh18	0.94089	-0.0879023	NaN	1	NaN	-0.0879023	NaN	NaN	NaN	7675500	7221800	NaN	NaN	3	3	3	3	3	3	125.42	0	4.2122	4306600	4	0	3	0	0	3	0	81256	0	0
P40142	P40142	Transketolase	Tkt	0.949511	-0.0747431	NaN	1	NaN	NaN	-0.0747431	NaN	NaN	NaN	NaN	2424300	2301900	2	2	2	3.2	3.2	3.2	67.63	0	3.3169	27233000	13	0	0	2	0	0	2	800980	0	0
P48356	P48356	Leptin receptor	Lepr	0.953448	-0.0687739	NaN	1	NaN	-0.0687739	NaN	NaN	NaN	9960900	9497200	NaN	NaN	3	3	3	4.7	4.7	4.7	130.79	0	41.903	6269800	6	0	3	0	0	3	0	116110	0	0
Q99P91	Q99P91	Transmembrane glycoprotein NMB	Gpnmb	0.957339	-0.0628975	NaN	1	-0.0628975	NaN	NaN	459910	440290	NaN	5197200	NaN	NaN	3	3	3	5.2	5.2	5.2	63.675	0	68.065	4006400	5	2	1	0	2	2	0	182110	0	0
P04925	P04925	Major prion protein	Prnp	0.958925	-0.0605106	NaN	1	-0.0605106	NaN	NaN	3600700	3452800	NaN	12610000	NaN	NaN	2	2	2	9.1	9.1	9.1	27.977	0	18.365	20992000	13	2	1	0	2	1	0	1749300	0	0
G3X9C2	G3X9C2	F-box only protein 50	Nccrp1	0.96487	-0.0515935	NaN	1	NaN	-0.0515935	NaN	NaN	NaN	4235700	4086900	NaN	NaN	2	2	2	5.3	5.3	5.3	30.407	0	3.9604	2147800	5	0	2	1	0	2	0	119320	0	0
O08532	O08532	Voltage-dependent calcium channel subunit alpha-2/delta-1;Voltage-dependent calcium channel subunit alpha-2-1;Voltage-dependent calcium channel subunit delta-1	Cacna2d1	0.969178	-0.045166	NaN	1	-0.045166	NaN	NaN	56324	54588	NaN	1317400	NaN	NaN	3	3	3	2.8	2.8	2.8	124.63	0	3.6151	2172400	4	2	1	0	2	1	0	36821	0	0
Q60841	Q60841	Reelin	Reln	0.973653	-0.0385199	NaN	1	NaN	-0.0385199	NaN	74628	NaN	6312000	6145700	NaN	215340	7	7	7	2.3	2.3	2.3	387.49	0	14.868	8366300	9	2	4	1	1	4	2	61973	0	0
Q99K10	Q99K10	Neuroligin-1	Nlgn1	0.980252	-0.0287756	NaN	1	NaN	-0.0287756	NaN	NaN	NaN	23344000	22883000	NaN	NaN	8	7	4	13.6	12.2	8.9	94.148	0	81.957	12453000	9	0	4	0	0	4	0	401720	0	0
Q9D8N0	Q9D8N0	Elongation factor 1-gamma	Eef1g	0.980357	-0.0286212	NaN	1	-0.0286212	NaN	NaN	1496700	1467300	NaN	2685400	NaN	NaN	3	3	3	8.5	8.5	8.5	50.06	0	11.106	22475000	8	3	1	0	3	1	0	864410	0	0
O70514	O70514	Fibroblast growth factor-binding protein 1	Fgfbp1	0.982566	-0.0253732	NaN	1	NaN	-0.0253732	NaN	NaN	76435	4313500	4238300	NaN	6818.2	1	1	1	8	8	8	28.294	0	34.068	7595300	4	1	1	1	1	1	1	542520	0	0
Q9R1Q6	Q9R1Q6	Transmembrane protein 176B	Tmem176b	0.987967	-0.0174651	NaN	1	-0.0174651	NaN	NaN	600020	592800	NaN	3540700	NaN	NaN	2	2	2	10.3	10.3	10.3	28.367	0	11.257	4367900	7	2	1	0	2	1	0	485330	0	0
P48774	P48774	Glutathione S-transferase Mu 5	Gstm5	0.991121	-0.0128668	NaN	1	NaN	-0.0128668	NaN	NaN	401800	3705400	3672500	NaN	NaN	6	6	5	19.6	19.6	19.6	26.635	0	9.9988	3451200	10	1	3	0	4	3	0	191730	0	0
Q8R242	Q8R242	Di-N-acetylchitobiase	Ctbs	0.991247	-0.0126841	NaN	1	NaN	NaN	-0.0126841	NaN	NaN	NaN	4813800	335870	332930	4	4	4	16.4	16.4	16.4	41.295	0	16.527	43488000	9	0	1	4	0	1	4	2174400	0	0
Q9WV32	Q9WV32	Actin-related protein 2/3 complex subunit 1B	Arpc1b	0.992737	-0.0105161	NaN	1	NaN	-0.0105161	NaN	NaN	304910	14182000	14079000	NaN	NaN	4	4	4	10.8	10.8	10.8	41.063	0	10.199	22848000	6	0	4	0	1	4	0	1202500	0	0
Q8BK62	Q8BK62	Olfactomedin-like protein 3	Olfml3	0.993008	-0.0101234	NaN	1	NaN	NaN	-0.0101234	NaN	NaN	NaN	NaN	2359700	2343200	3	3	3	10.6	10.6	10.6	45.745	0	55.994	19226000	15	0	0	3	0	0	3	873910	0	0
Q04592	Q04592	Proprotein convertase subtilisin/kexin type 5	Pcsk5	0.996368	-0.00524881	NaN	1	NaN	-0.00524881	NaN	NaN	662600	35797000	35667000	NaN	NaN	5	5	5	3.2	3.2	3.2	209.26	0	39.581	21552000	8	1	5	0	1	4	0	217700	0	0
P70441	P70441	Na(+)/H(+) exchange regulatory cofactor NHE-RF1	Slc9a3r1	0.999768	-0.000334568	NaN	1	-0.000334568	NaN	NaN	560640	560510	NaN	2844700	NaN	NaN	2	2	2	7	7	7	38.6	0.009058	2.2882	10612000	4	2	1	0	2	1	0	408140	0	0
P57716	P57716	Nicastrin	Ncstn	0.999909	-0.000131739	NaN	1	-0.000131739	NaN	NaN	876130	876050	5318900	NaN	NaN	NaN	3	3	3	4.1	4.1	4.1	78.491	0	4.9796	8695100	8	3	1	0	3	1	0	235000	0	0
P97464	P97464	Exostosin-1	Ext1	1.00321	0.00462926	NaN	1	NaN	0.00462926	NaN	NaN	154240	10579000	10613000	396880	NaN	4	4	4	6.6	6.6	6.6	86.307	0	5.3422	24300000	9	1	2	1	1	3	1	578560	0	0
Q6AZB0	Q6AZB0	Brother of CDO	Boc	1.00482	0.00694247	NaN	1	NaN	0.00694247	NaN	NaN	340870	29645000	29788000	NaN	NaN	5	5	5	7	7	7	121.33	0	23.945	22735000	13	1	4	0	3	4	0	391980	0	0
P60710	P60710	Actin, cytoplasmic 1;Actin, cytoplasmic 1, N-terminally processed	Actb	1.00675	0.00971088	NaN	1	NaN	NaN	0.00971088	NaN	6308100	NaN	50357000	6337200	6380000	46	46	2	87.2	87.2	7.2	41.736	0	323.31	242080000	56	1	1	2	1	1	2	10525000	0	0
Q01853	Q01853	Transitional endoplasmic reticulum ATPase	Vcp	1.00873	0.0125371	NaN	1	NaN	0.0125371	NaN	NaN	NaN	88337000	89108000	NaN	325150	15	15	15	27.9	27.9	27.9	89.321	0	209.61	53403000	24	0	13	1	0	14	1	1112600	0	0
Q9JHW2	Q9JHW2	Omega-amidase NIT2	Nit2	1.01189	0.0170562	NaN	1	0.0170562	NaN	NaN	850950	861070	NaN	1673300	NaN	NaN	3	3	3	14.1	14.1	14.1	30.501	0	26.067	3809800	6	2	1	0	3	1	0	200520	0	0
Q921M7	Q921M7	Protein FAM49B	Fam49b	1.01648	0.0235809	NaN	1	0.0235809	NaN	NaN	3052300	3102600	NaN	5436800	NaN	NaN	4	4	4	16.4	16.4	16.4	36.776	0	24.248	14156000	14	4	1	0	4	1	0	615470	0	0
Q61703	Q61703	Inter-alpha-trypsin inhibitor heavy chain H2	Itih2	1.02098	0.0299532	NaN	1	NaN	0.0299532	NaN	NaN	NaN	20592000	21024000	NaN	NaN	20	3	3	17.2	5.7	5.7	105.93	0	22.683	19202000	8	0	3	0	0	3	0	376520	0	0
P48758	P48758	Carbonyl reductase [NADPH] 1	Cbr1	1.02897	0.0412037	NaN	1	NaN	0.0412037	NaN	NaN	615270	4173000	4293900	NaN	NaN	2	2	2	7.9	7.9	7.9	30.641	0.0082493	2.4046	8127900	5	1	2	0	1	2	0	427780	0	0
Q9CQD1	Q9CQD1	Ras-related protein Rab-5A	Rab5a	1.04574	0.0645303	NaN	1	NaN	0.0645303	NaN	NaN	303740	6413900	6707300	NaN	NaN	3	2	2	17.2	12.1	12.1	23.598	0	4.2156	4198000	5	1	2	0	1	2	0	299860	0	0
Q64455	Q64455	Receptor-type tyrosine-protein phosphatase eta	Ptprj	1.04789	0.0674849	NaN	1	0.0674849	NaN	NaN	270630	283590	731250	NaN	NaN	150830	5	5	5	4.1	4.1	4.1	136.77	0	5.0855	5045600	9	4	1	1	4	0	1	86993	0	0
P97797	P97797	Tyrosine-protein phosphatase non-receptor type substrate 1	Sirpa	1.05552	0.0779575	NaN	1	NaN	0.0779575	NaN	NaN	1517100	30384000	32071000	NaN	NaN	5	5	5	14	14	14	56.424	0	21.608	32738000	15	2	4	0	2	4	0	1023100	0	0
Q9WVB4	Q9WVB4	Slit homolog 3 protein	Slit3	1.05634	0.079081	NaN	1	0.079081	NaN	NaN	860770	909270	NaN	NaN	NaN	NaN	7	7	7	6	6	6	167.73	0	23.658	7029700	12	6	0	0	7	0	0	88984	0	0
P45376	P45376	Aldose reductase	Akr1b1	1.06524	0.0911726	NaN	1	NaN	0.0911726	NaN	1111200	NaN	15467000	16476000	NaN	213460	5	5	5	14.6	14.6	14.6	35.732	0	16.666	31384000	12	2	4	1	1	3	1	1494500	0	0
P45377;P21300	P45377;P21300	Aldose reductase-related protein 2;Aldose reductase-related protein 1	Akr1b8;Akr1b7	1.07215	0.100501	NaN	1	NaN	0.100501	NaN	NaN	299580	4788900	5134400	NaN	NaN	2	2	2	7.3	7.3	7.3	36.12	0	3.9364	9261100	4	1	2	0	1	2	0	463050	0	0
Q9CY64	Q9CY64	Biliverdin reductase A	Blvra	1.07833	0.108796	NaN	1	NaN	0.108796	NaN	NaN	142310	2420600	2610200	NaN	NaN	2	2	2	7.1	7.1	7.1	33.524	0	4.3096	4754800	3	1	2	0	1	2	0	237740	0	0
P35282	P35282	Ras-related protein Rab-21	Rab21	1.08063	0.111877	NaN	1	NaN	0.111877	NaN	NaN	NaN	3478700	3759200	NaN	NaN	2	2	2	10.4	10.4	10.4	24.106	0	4.2052	1533900	2	0	2	0	0	2	0	102260	0	0
Q8VI56	Q8VI56	Low-density lipoprotein receptor-related protein 4	Lrp4	1.081	0.112365	NaN	1	NaN	0.112365	NaN	NaN	108810	16494000	17830000	NaN	NaN	7	7	7	5.5	5.5	5.5	211.95	0	47.882	22973000	14	0	6	0	2	6	0	218790	0	0
Q922Q6	Q922Q6	Alpha/beta hydrolase domain-containing protein 14A	Abhd14a	1.08577	0.118721	NaN	1	0.118721	NaN	NaN	785690	853080	NaN	25014000	NaN	NaN	3	3	3	23.1	23.1	23.1	27.839	0	7.3965	39249000	11	2	2	0	2	2	0	2803500	0	0
Q6PDJ1	Q6PDJ1	VWFA and cache domain-containing protein 1	Cachd1	1.08841	0.122227	NaN	1	0.122227	NaN	NaN	131880	143540	NaN	4606200	NaN	NaN	7	7	7	7.1	7.1	7.1	143.81	0	27.495	5043900	9	4	1	0	5	3	0	72056	0	0
P56399	P56399	Ubiquitin carboxyl-terminal hydrolase 5	Usp5	1.09446	0.130223	NaN	1	NaN	0.130223	NaN	NaN	136210	29980000	32812000	NaN	46780	5	5	5	7.1	7.1	7.1	95.832	0	51.869	24067000	19	0	4	1	1	5	1	534830	0	0
Q61598	Q61598	Rab GDP dissociation inhibitor beta	Gdi2	1.09744	0.134136	NaN	1	0.134136	NaN	NaN	1840200	2019500	NaN	894050	NaN	NaN	6	6	4	16	16	11.5	50.537	0	13.475	23272000	10	4	1	0	4	1	0	802470	0	0
Q61805	Q61805	Lipopolysaccharide-binding protein	Lbp	1.10636	0.145822	NaN	1	NaN	0.145822	NaN	184680	NaN	10690000	11827000	NaN	123280	6	6	6	12.5	12.5	12.5	53.055	0	21.783	95028000	10	2	5	0	1	4	1	4751400	0	0
P63260	P63260	Actin, cytoplasmic 2;Actin, cytoplasmic 2, N-terminally processed	Actg1	1.10844	0.148527	NaN	1	NaN	NaN	0.148527	NaN	4400700	NaN	46878000	2713100	3007300	46	2	2	87.2	7.2	7.2	41.792	0	306.77	163560000	19	1	1	2	1	1	2	7111300	0	0
P10518	P10518	Delta-aminolevulinic acid dehydratase	Alad	1.11025	0.150878	NaN	1	0.150878	NaN	NaN	470860	522770	NaN	NaN	NaN	NaN	4	4	4	12.7	12.7	12.7	36.023	0	6.4783	4048000	6	3	0	0	3	0	0	238120	0	0
P62137;P63087	P62137;P63087	Serine/threonine-protein phosphatase PP1-alpha catalytic subunit;Serine/threonine-protein phosphatase PP1-gamma catalytic subunit	Ppp1ca;Ppp1cc	1.11371	0.15538	NaN	1	NaN	0.15538	NaN	NaN	74962	3072600	3422000	NaN	NaN	5	5	2	23.6	23.6	7.3	37.54	0	36.69	5211100	4	0	2	0	1	2	0	260550	0	0
Q7TQA1	Q7TQA1	Immunoglobulin superfamily member 1	Igsf1	1.11475	0.156726	NaN	1	NaN	0.156726	NaN	NaN	NaN	44312000	49397000	NaN	252860	5	5	5	6.5	6.5	6.5	147.01	0	17.179	29817000	17	0	5	1	0	4	1	562580	0	0
P13745;P10648;P30115;P24472	P13745;P10648	Glutathione S-transferase A1;Glutathione S-transferase A1, N-terminally processed;Glutathione S-transferase A2	Gsta1;Gsta2	1.11494	0.156971	NaN	1	0.156971	NaN	NaN	16147000	18003000	NaN	79718000	NaN	167730	3	3	3	10.8	10.8	10.8	25.608	0	5.6487	106970000	9	2	1	0	2	2	1	7640400	0	0
Q99KI0	Q99KI0	Aconitate hydratase, mitochondrial	Aco2	1.11718	0.159866	NaN	1	NaN	0.159866	NaN	NaN	NaN	16120000	18009000	NaN	NaN	3	3	3	7.1	7.1	7.1	85.462	0	21.819	14460000	7	0	3	0	0	3	0	328640	0	0
Q01730	Q01730	Ras suppressor protein 1	Rsu1	1.12283	0.16714	NaN	1	0.16714	NaN	NaN	3849200	4322000	NaN	1833100	NaN	NaN	5	5	5	26.7	26.7	26.7	31.55	0	52.028	14651000	15	5	1	0	5	1	0	861810	0	0
Q9D0R2	Q9D0R2	Threonine--tRNA ligase, cytoplasmic	Tars	1.13345	0.180727	NaN	1	NaN	0.180727	NaN	NaN	115870	5769000	6538900	NaN	NaN	2	2	2	2.8	2.8	2.8	83.355	0	10.157	6625900	5	1	2	0	1	2	0	138040	0	0
Q80ZA4	Q80ZA4	Fibrocystin-L	Pkhd1l1	1.13552	0.183354	NaN	1	NaN	0.183354	NaN	NaN	NaN	27221000	30910000	NaN	29636	3	3	3	1.3	1.3	1.3	464.73	0.0091408	2.3847	188720000	3	0	2	0	0	2	1	1090900	0	0
Q9R001	Q9R001	A disintegrin and metalloproteinase with thrombospondin motifs 5	Adamts5	1.13763	0.186031	NaN	1	NaN	0.186031	NaN	NaN	NaN	14074000	16011000	NaN	NaN	4	4	4	7.5	7.5	7.5	101.84	0	5.7888	6197300	5	0	4	0	0	3	0	108720	0	0
Q62523	Q62523	Zyxin	Zyx	1.13818	0.186723	NaN	1	NaN	0.186723	NaN	NaN	NaN	6319500	7192700	NaN	NaN	3	3	3	8.2	8.2	8.2	60.545	0	3.7899	8192500	6	0	3	0	0	3	0	315100	0	0
Q9D1Q6	Q9D1Q6	Endoplasmic reticulum resident protein 44	Erp44	1.14187	0.191392	NaN	1	0.191392	NaN	NaN	915870	1045800	NaN	1574900	NaN	NaN	3	3	3	13.1	13.1	13.1	46.852	0	6.088	13393000	6	3	1	0	3	1	0	558050	0	0
P24452	P24452	Macrophage-capping protein	Capg	1.14708	0.197961	NaN	1	NaN	0.197961	NaN	441090	NaN	2353200	2699300	108390	NaN	2	2	2	7.1	7.1	7.1	39.24	0	25.655	13671000	10	1	2	1	1	2	0	854430	0	0
Q8BQB4	Q8BQB4	Four-jointed box protein 1	Fjx1	1.15122	0.20317	NaN	1	NaN	0.20317	NaN	NaN	438090	1481900	1706000	NaN	NaN	2	2	2	5.3	5.3	5.3	50.395	0	4.0881	8358900	4	1	2	0	1	2	0	288240	0	0
Q80TR1	Q80TR1	Latrophilin-1	Lphn1	1.15529	0.208258	NaN	1	NaN	0.208258	NaN	57190	NaN	6006100	6938800	NaN	NaN	3	3	3	4.6	4.6	4.6	161.68	0	15.664	5137400	6	1	2	0	2	2	0	71353	0	0
Q5SUR0	Q5SUR0	Phosphoribosylformylglycinamidine synthase	Pfas	1.15753	0.211044	NaN	1	NaN	0.211044	NaN	NaN	36478	14823000	17158000	NaN	NaN	4	4	4	4.1	4.1	4.1	144.63	0	7.4889	13944000	8	1	3	0	1	4	0	221330	0	0
P29416	P29416	Beta-hexosaminidase subunit alpha	Hexa	1.16063	0.214904	NaN	1	NaN	NaN	0.214904	NaN	NaN	NaN	NaN	1857100	2155400	7	7	7	21.4	21.4	21.4	60.612	0	17.318	65275000	14	0	0	7	0	0	7	2510600	0	0
Q9QYK5	Q9QYK5	Heparan-sulfate 6-O-sulfotransferase 1	Hs6st1	1.16151	0.215998	NaN	1	0.215998	NaN	NaN	1114500	1294500	NaN	1192900	NaN	NaN	4	4	4	10.7	10.7	10.7	48.302	0	31.869	72161000	8	4	1	0	3	1	0	3280000	0	0
P52795	P52795	Ephrin-B1	Efnb1	1.16215	0.216792	NaN	1	NaN	0.216792	NaN	NaN	NaN	1224200	1422700	NaN	NaN	2	2	2	9	9	9	37.859	0.0019139	2.9	688110	2	0	2	0	0	2	0	31278	0	0
P97372	P97372	Proteasome activator complex subunit 2	Psme2	1.16387	0.218936	NaN	1	0.218936	NaN	NaN	1098400	1278400	NaN	4852200	NaN	NaN	3	3	3	15.5	15.5	15.5	27.057	0	25.148	7253600	5	2	1	0	3	1	0	402980	0	0
P70296	P70296	Phosphatidylethanolamine-binding protein 1;Hippocampal cholinergic neurostimulating peptide	Pebp1	1.16393	0.21901	NaN	1	0.21901	NaN	NaN	429440	499840	NaN	NaN	NaN	NaN	2	2	2	14.4	14.4	14.4	20.83	0	18.379	3496800	5	2	0	0	2	0	0	349680	0	0
Q99LS3	Q99LS3	Phosphoserine phosphatase	Psph	1.16702	0.222825	NaN	1	0.222825	NaN	NaN	557370	650460	NaN	NaN	NaN	NaN	3	3	3	14.7	14.7	14.7	25.096	0	6.639	2049100	3	2	0	0	2	1	0	146370	0	0
Q9JI59	Q9JI59	Junctional adhesion molecule B	Jam2	1.1752	0.232912	NaN	1	0.232912	NaN	NaN	533320	626760	NaN	NaN	NaN	NaN	2	2	2	7	7	7	33.047	0	4.7852	5750000	4	2	0	0	2	0	0	338230	0	0
P63085;Q63844;Q6P5G0;Q61532	P63085	Mitogen-activated protein kinase 1	Mapk1	1.1806	0.239516	NaN	1	NaN	0.239516	NaN	NaN	94152	6762600	7983900	NaN	NaN	5	5	5	14.8	14.8	14.8	41.275	0	6.23	18296000	9	1	4	0	1	4	0	762350	0	0
Q80UW0	Q80UW0	Heparan-sulfate 6-O-sulfotransferase 2	Hs6st2	1.19377	0.255522	NaN	1	NaN	0.255522	NaN	NaN	213100	13831000	16511000	NaN	NaN	3	3	3	6.9	6.9	6.9	69.197	0	43.093	12759000	8	0	2	0	1	2	0	364540	0	0
O35887	O35887	Calumenin	Calu	1.19644	0.258749	NaN	1	0.258749	NaN	NaN	2613000	3126300	NaN	10778000	NaN	NaN	8	8	8	26.7	26.7	26.7	37.063	0	71.484	160720000	21	7	2	0	6	3	0	9454300	0	0
P97371	P97371	Proteasome activator complex subunit 1	Psme1	1.20598	0.270205	NaN	1	0.270205	NaN	NaN	1940000	2339600	NaN	NaN	NaN	NaN	4	4	4	23.3	23.3	23.3	28.673	0	13.089	7177900	5	3	0	0	4	0	0	398770	0	0
P97953	P97953	Vascular endothelial growth factor C	Vegfc	1.20613	0.270381	NaN	1	NaN	0.270381	NaN	NaN	NaN	3016600	3638400	NaN	NaN	1	1	1	2.9	2.9	2.9	46.471	0.0056022	2.593	3811600	2	0	1	0	0	1	0	131430	0	0
Q64442	Q64442	Sorbitol dehydrogenase	Sord	1.20676	0.27114	NaN	1	NaN	0.27114	NaN	NaN	136470	5992900	7232000	NaN	NaN	1	1	1	4.5	4.5	4.5	38.249	0	24.61	16466000	4	1	1	0	1	1	0	748430	0	0
Q9WVL6	Q9WVL6	Exostosin-like 3	Extl3	1.21197	0.277358	NaN	1	NaN	0.277358	NaN	NaN	NaN	3432500	4160100	NaN	NaN	2	2	2	3.5	3.5	3.5	104.47	0.0090416	2.2803	1902400	2	0	2	0	0	2	0	33971	0	0
P20060	P20060	Beta-hexosaminidase subunit beta	Hexb	1.22675	0.294839	NaN	1	NaN	NaN	0.294839	NaN	NaN	NaN	NaN	6849900	8403100	13	13	13	26.1	26.1	26.1	61.115	0	62.141	228480000	27	0	0	12	0	0	12	7616000	0	0
Q9R1P3	Q9R1P3	Proteasome subunit beta type-2	Psmb2	1.26704	0.341461	NaN	1	0.341461	NaN	NaN	854670	1082900	NaN	4936000	NaN	NaN	2	2	2	12.9	12.9	12.9	22.906	0	39.588	8332900	7	2	1	0	2	2	0	694410	0	0
O35593	O35593	26S proteasome non-ATPase regulatory subunit 14	Psmd14	1.27178	0.346854	NaN	1	NaN	0.346854	NaN	584290	NaN	3114600	3961100	NaN	NaN	2	2	2	12.6	12.6	12.6	34.577	0	6.4499	5689800	8	2	2	0	1	2	0	334700	0	0
P97927	P97927	Laminin subunit alpha-4	Lama4	1.2786	0.354568	NaN	1	NaN	0.354568	NaN	NaN	NaN	2505000	3202900	NaN	NaN	3	3	3	2.3	2.3	2.3	201.82	0	10.753	4664600	3	0	3	0	0	3	0	44424	0	0
P08752;P20612;Q9DC51;Q3V3I2;P50149;P18872;B2RSH2;Q8CGK7;P63094;Q6R0H7	P08752	Guanine nucleotide-binding protein G(i) subunit alpha-2	Gnai2	1.27907	0.355094	NaN	1	0.355094	NaN	NaN	1975500	2526800	NaN	2692100	NaN	NaN	4	4	4	15.8	15.8	15.8	40.489	0	18.077	17598000	6	4	1	0	4	1	0	879920	0	0
Q05909	Q05909	Receptor-type tyrosine-protein phosphatase gamma	Ptprg	1.28122	0.35752	NaN	1	NaN	0.35752	NaN	NaN	157810	7720600	9891800	70056	NaN	5	5	5	6.2	6.2	6.2	161.24	0	33.071	9690200	11	1	4	1	2	2	0	136480	0	0
Q922P8	Q922P8	Transmembrane protein 132A	Tmem132a	1.28605	0.362951	NaN	1	NaN	0.362951	NaN	NaN	253090	26058000	33512000	NaN	NaN	7	7	7	10	10	10	110.24	0	47.298	19387000	16	1	6	0	3	6	0	412490	0	0
P28271	P28271	Cytoplasmic aconitate hydratase	Aco1	1.29019	0.367586	NaN	1	NaN	0.367586	NaN	NaN	NaN	40008000	51618000	NaN	NaN	9	9	9	10.6	10.6	10.6	98.124	0	17.099	26431000	16	0	9	0	0	9	0	528630	0	0
P70195	P70195	Proteasome subunit beta type-7	Psmb7	1.29479	0.372713	NaN	1	0.372713	NaN	NaN	375120	485700	NaN	1632400	NaN	NaN	2	2	2	14.1	14.1	14.1	29.891	0	4.5736	1727400	5	2	0	0	2	1	0	143950	0	0
Q02788	Q02788	Collagen alpha-2(VI) chain	Col6a2	1.29617	0.374251	NaN	1	NaN	0.374251	NaN	NaN	NaN	42753000	55415000	NaN	NaN	14	14	14	16.6	16.6	16.6	110.33	0	35.96	48242000	24	1	13	0	0	14	0	790850	0	0
P97857	P97857	A disintegrin and metalloproteinase with thrombospondin motifs 1	Adamts1	1.29898	0.377375	NaN	1	0.377375	NaN	NaN	289120	375560	7705900	NaN	NaN	NaN	2	2	2	3.3	3.3	3.3	105.8	0	4.1495	4622900	5	2	1	0	2	1	0	81104	0	0
Q00780	Q00780	Collagen alpha-1(VIII) chain;Vastatin	Col8a1	1.29948	0.377939	NaN	1	0.377939	NaN	NaN	3023200	3928600	NaN	1282100	NaN	NaN	3	3	3	5.4	5.4	5.4	73.606	0	15.908	16571000	6	2	1	0	3	1	0	404170	0	0
Q68FD5	Q68FD5	Clathrin heavy chain 1	Cltc	1.30204	0.380769	NaN	1	NaN	0.380769	NaN	NaN	37017	21077000	27443000	NaN	NaN	10	10	10	9.3	9.3	9.3	191.55	0	49.473	24855000	12	1	8	0	2	10	0	253620	0	0
Q62059	Q62059	Versican core protein	Vcan	1.31179	0.391539	NaN	1	0.391539	NaN	NaN	373550	490020	1985300	NaN	NaN	457200	3	3	3	2	2	2	366.78	0	5.1235	5952000	4	2	1	1	2	0	1	45091	0	0
O70456	O70456	14-3-3 protein sigma	Sfn	1.31703	0.397292	NaN	1	0.397292	NaN	NaN	11043000	14544000	NaN	44335000	NaN	NaN	5	2	2	19.8	9.7	9.7	27.706	0.00096805	3.0321	69437000	5	2	1	0	2	1	0	3654600	0	0
Q9Z2L6	Q9Z2L6	Multiple inositol polyphosphate phosphatase 1	Minpp1	1.32344	0.404297	NaN	1	0.404297	NaN	NaN	839250	1110700	NaN	NaN	NaN	80656	6	6	6	16.6	16.6	16.6	54.537	0	17.965	51427000	10	4	0	1	4	0	1	2142800	0	0
Q60854	Q60854	Serpin B6	Serpinb6	1.32739	0.408589	NaN	1	NaN	0.408589	NaN	NaN	186820	2326300	3087900	NaN	NaN	3	3	3	9	9	9	42.598	0	109.56	8296500	5	1	2	0	1	3	0	360720	0	0
Q9CXW3	Q9CXW3	Calcyclin-binding protein	Cacybp	1.35574	0.439078	NaN	1	0.439078	NaN	NaN	828110	1122700	NaN	NaN	NaN	NaN	3	3	3	13.5	13.5	13.5	26.51	0	59.22	3247900	6	3	0	0	3	0	0	202990	0	0
Q9CZ04	Q9CZ04	COP9 signalosome complex subunit 7a	Cops7a	1.35774	0.441203	NaN	1	NaN	0.441203	NaN	NaN	447470	3092500	4198800	NaN	NaN	2	2	2	9.5	9.5	9.5	30.224	0	15.822	4789900	5	1	2	0	1	2	0	299370	0	0
O09172	O09172	Glutamate--cysteine ligase regulatory subunit	Gclm	1.35811	0.441598	NaN	1	0.441598	NaN	NaN	1162500	1578800	NaN	9463600	NaN	NaN	2	2	2	10.6	10.6	10.6	30.534	0	18.352	11003000	6	2	1	0	2	1	0	785930	0	0
Q61792	Q61792	LIM and SH3 domain protein 1	Lasp1	1.36142	0.445114	NaN	1	NaN	0.445114	NaN	NaN	NaN	7716200	10505000	34531	NaN	4	4	4	20.2	20.2	20.2	29.994	0	21.1	10219000	13	0	4	1	0	4	0	638690	0	0
Q99PT1	Q99PT1	Rho GDP-dissociation inhibitor 1	Arhgdia	1.36525	0.449169	NaN	1	0.449169	NaN	NaN	3075400	4198700	5035600	NaN	106170	NaN	3	3	3	28.4	28.4	28.4	23.407	0	13.038	14825000	10	3	1	1	3	1	0	988360	0	0
Q8K479	Q8K479	Complement C1q tumor necrosis factor-related protein 5	C1qtnf5	1.37011	0.454288	NaN	1	0.454288	NaN	NaN	11521000	15785000	19518000	NaN	NaN	NaN	5	5	5	21.4	21.4	21.4	25.436	0	48.26	65505000	14	3	2	0	4	1	0	4367000	0	0
Q8VCC9	Q8VCC9	Spondin-1	Spon1	1.37859	0.463199	NaN	1	NaN	0.463199	NaN	NaN	1390600	46073000	63516000	1009100	NaN	7	7	7	15	15	15	90.82	0	102.64	43885000	20	1	4	1	4	4	1	1044900	0	0
Q9ESM6	Q9ESM6	Glycerophosphoinositol inositolphosphodiesterase GDPD2	Gdpd2	1.3836	0.468422	NaN	1	NaN	0.468422	NaN	NaN	NaN	15386000	21288000	NaN	201370	3	3	3	6.9	6.9	6.9	61.164	0	5.8594	11920000	7	0	3	1	0	3	1	541820	0	0
Q9JJ61	Q9JJ61	Polypeptide N-acetylgalactosaminyltransferase 16	Galnt16	1.39397	0.479202	NaN	1	0.479202	NaN	NaN	533920	744270	4011700	NaN	NaN	404830	6	6	6	16.7	16.7	16.7	62.874	0	20.729	64947000	10	3	2	1	3	1	1	2095100	0	0
Q8BHN0	Q8BHN0	Protein phosphatase 1L	Ppm1l	1.39576	0.48105	NaN	1	0.48105	NaN	NaN	651710	909630	NaN	NaN	NaN	NaN	2	2	2	5.8	5.8	5.8	41.049	0	5.0993	2645200	4	2	0	0	2	0	0	115010	0	0
Q62422	Q62422	Osteoclast-stimulating factor 1	Ostf1	1.39795	0.483314	NaN	1	NaN	0.483314	NaN	NaN	NaN	9643400	13481000	NaN	NaN	4	4	4	19.5	19.5	19.5	23.782	0	6.5259	4857800	5	0	4	0	0	2	0	373680	0	0
P46425;P19157	P46425;P19157	Glutathione S-transferase P 2;Glutathione S-transferase P 1	Gstp2;Gstp1	1.41184	0.49758	NaN	1	0.49758	NaN	NaN	425040	600090	11670000	NaN	NaN	NaN	2	2	2	17.1	17.1	17.1	23.537	0	42.423	7287000	8	2	1	0	2	1	0	560540	0	0
Q8BM13	Q8BM13	Noelin-2	Olfm2	1.41481	0.500606	NaN	1	NaN	NaN	0.500606	NaN	496360	NaN	NaN	3873600	5480400	4	4	4	10	10	10	50.72	0	6.6352	58325000	15	1	0	3	1	0	4	2777400	0	0
Q9ESY9	Q9ESY9	Gamma-interferon-inducible lysosomal thiol reductase	Ifi30	1.41711	0.50295	NaN	1	0.50295	NaN	NaN	796340	1128500	NaN	544010	NaN	NaN	2	2	2	10.9	10.9	10.9	27.784	0.0056285	2.6099	4526800	4	2	1	0	2	1	0	348210	0	0
P14869	P14869	60S acidic ribosomal protein P0	Rplp0	1.42966	0.515676	NaN	1	NaN	0.515676	NaN	NaN	574170	4996700	7143600	NaN	NaN	3	3	3	11.4	11.4	11.4	34.216	0	10.392	10368000	11	1	3	0	2	3	0	576020	0	0
Q812F8	Q812F8	Alpha-1,3-mannosyl-glycoprotein 4-beta-N-acetylglucosaminyltransferase B	Mgat4b	1.44501	0.531078	NaN	1	NaN	0.531078	NaN	NaN	NaN	8786800	12697000	NaN	196970	5	5	5	10.8	10.8	10.8	63.301	0	11.577	15294000	8	0	4	1	0	4	2	463460	0	0
Q9JJ04	Q9JJ04	Beta-1,4-galactosyltransferase 4;N-acetyllactosamine synthase;Lactotriaosylceramide beta-1,4-galactosyltransferase	B4galt4	1.46945	0.555279	NaN	1	NaN	0.555279	NaN	NaN	750390	3728600	5479000	NaN	107630	3	3	3	8.4	8.4	8.4	39.699	0	8.6729	21176000	9	1	2	1	1	3	1	1008400	0	0
Q62179	Q62179	Semaphorin-4B	Sema4b	1.53626	0.619427	NaN	1	NaN	0.619427	NaN	135930	NaN	15580000	23935000	NaN	270230	5	5	5	8.3	8.3	8.3	91.391	0	8.1452	17617000	11	1	4	1	2	4	1	419460	0	0
Q8VED9	Q8VED9	Galectin-related protein	Lgalsl	1.54427	0.626921	NaN	1	NaN	0.626921	NaN	38938	NaN	3227100	4983500	NaN	NaN	3	3	3	19.2	19.2	19.2	18.955	0	3.8273	2255300	6	1	3	0	0	3	0	225530	0	0
P97466	P97466	Noggin	Nog	1.54529	0.627875	NaN	1	0.627875	NaN	NaN	3040600	4698600	NaN	NaN	NaN	NaN	4	4	4	31.9	31.9	31.9	25.77	0	13.934	13270000	7	4	0	0	4	0	0	1020800	0	0
Q9D8T0	Q9D8T0	Protein FAM3A	Fam3a	1.57558	0.655886	NaN	1	NaN	0.655886	NaN	149100	NaN	13409000	21127000	NaN	NaN	3	3	3	16.5	16.5	16.5	25.393	0	145.96	7588100	6	1	3	0	0	2	0	505870	0	0
Q3V1M1	Q3V1M1	Immunoglobulin superfamily member 10	Igsf10	1.58039	0.660282	NaN	1	NaN	0.660282	NaN	NaN	NaN	4611200	7287500	NaN	NaN	3	3	3	1.3	1.3	1.3	285.59	0	3.3944	8393500	3	0	2	0	0	3	0	55220	0	0
Q60675	Q60675	Laminin subunit alpha-2	Lama2	1.59717	0.675518	NaN	1	NaN	0.675518	NaN	NaN	57701	2629400	4199600	NaN	NaN	4	4	4	1.6	1.6	1.6	343.81	0	9.1715	7044200	5	0	3	0	2	3	0	36499	0	0
Q9DCS1	Q9DCS1	Transmembrane protein 176A	Tmem176a	1.60887	0.686049	NaN	1	0.686049	NaN	NaN	411680	662340	NaN	1064200	NaN	NaN	2	2	2	9.8	9.8	9.8	26.596	0	20.688	2171900	5	2	1	0	2	1	0	180990	0	0
Q7TT36	Q7TT36	Probable G-protein coupled receptor 125	Gpr125	1.67131	0.740977	NaN	1	NaN	0.740977	NaN	NaN	NaN	5020500	8390800	NaN	2092400	3	3	3	3.9	3.9	3.9	144.7	0.00097182	3.1129	22038000	4	0	2	1	0	2	1	361280	0	0
Q8BHN3	Q8BHN3	Neutral alpha-glucosidase AB	Ganab	1.67193	0.741516	NaN	1	NaN	0.741516	NaN	NaN	457500	19182000	32071000	NaN	133940	4	4	4	4.8	4.8	4.8	106.91	0	11.386	15880000	12	1	3	1	1	4	1	278590	0	0
Q60805	Q60805	Tyrosine-protein kinase Mer	Mertk	1.68459	0.752399	NaN	1	NaN	0.752399	NaN	NaN	844360	12850000	21647000	NaN	NaN	2	2	2	3.9	3.9	3.9	110.16	0	10.123	12992000	9	1	2	0	1	2	0	288720	0	0
P14901	P14901	Heme oxygenase 1	Hmox1	1.69122	0.758062	NaN	1	0.758062	NaN	NaN	365370	617920	NaN	NaN	NaN	NaN	3	3	3	21.8	21.8	21.8	32.928	0	14.611	1677000	4	3	0	0	3	0	0	119780	0	0
Q8BI06	Q8BI06	Cell migration-inducing and hyaluronan-binding protein	Cemip	1.71312	0.776625	NaN	1	NaN	0.776625	NaN	NaN	105020	2987300	5117600	NaN	NaN	3	3	3	2.5	2.5	2.5	153.03	0	3.9479	5457800	6	1	2	0	1	2	0	65756	0	0
Q61555	Q61555	Fibrillin-2	Fbn2	1.75731	0.81337	NaN	1	NaN	0.81337	NaN	NaN	29045	4664000	8196100	NaN	NaN	5	4	4	2.2	1.7	1.7	313.82	0	8.6108	8643300	6	0	4	0	1	4	0	60023	0	0
Q8BV13	Q8BV13	COP9 signalosome complex subunit 7b	Cops7b	1.79131	0.841013	NaN	1	0.841013	NaN	NaN	406530	728220	NaN	NaN	NaN	NaN	2	2	2	14	14	14	29.689	0	4.2043	1957400	4	1	0	0	2	0	0	150570	0	0
Q9CR16	Q9CR16	Peptidyl-prolyl cis-trans isomerase D	Ppid	1.83157	0.873081	NaN	1	NaN	0.873081	NaN	NaN	708490	1947400	3566800	NaN	NaN	3	3	3	8.6	8.6	8.6	40.742	0	6.4249	10638000	8	0	2	0	3	2	0	425540	0	0
Q9R118	Q9R118	Serine protease HTRA1	Htra1	1.84863	0.886455	NaN	1	NaN	0.886455	NaN	NaN	NaN	16443000	30397000	NaN	NaN	5	5	5	20.6	20.6	20.6	51.213	0	35.064	13688000	7	0	4	0	0	5	0	622190	0	0
O88544	O88544	COP9 signalosome complex subunit 4	Cops4	1.86991	0.902973	NaN	1	NaN	0.902973	NaN	NaN	254670	3667600	6858100	NaN	NaN	2	2	2	5.9	5.9	5.9	46.284	0	6.5598	14560000	5	1	2	0	1	2	0	519990	0	0
Q571E4	Q571E4	N-acetylgalactosamine-6-sulfatase	Galns	1.88358	0.913474	NaN	1	0.913474	NaN	NaN	113980	214690	NaN	NaN	NaN	NaN	2	2	2	4.8	4.8	4.8	57.673	0	7.7258	8802300	3	2	0	0	2	0	0	326010	0	0
Q64520	Q64520	Guanylate kinase	Guk1	1.88843	0.917187	NaN	1	NaN	0.917187	NaN	NaN	108810	1936000	3656000	NaN	NaN	2	2	2	13.6	13.6	13.6	21.918	0.00096618	3.0175	1746700	4	0	2	0	1	2	0	124760	0	0
P23359	P23359	Bone morphogenetic protein 7	Bmp7	1.95873	0.969916	NaN	1	NaN	0.969916	NaN	321740	NaN	2258100	4423000	NaN	NaN	3	3	3	11.2	11.2	11.2	49.198	0	10.526	5557400	6	1	2	0	1	3	0	308750	0	0
Q05895	Q05895	Thrombospondin-3	Thbs3	1.96411	0.973874	NaN	1	NaN	0.973874	NaN	NaN	80161	5694700	11185000	NaN	NaN	4	4	4	8.4	8.4	8.4	104.12	0	14.09	10028000	8	1	3	0	1	4	0	294940	0	0
Q62348	Q62348	Translin	Tsn	1.97802	0.984058	NaN	1	0.984058	NaN	NaN	116020	229490	491110	NaN	NaN	NaN	2	2	2	11.8	11.8	11.8	26.201	0	4.7984	1422800	5	2	1	0	2	0	0	101630	0	0
Q8BLI0	Q8BLI0	ADAMTS-like protein 1	Adamtsl1	1.9864	0.990156	NaN	1	NaN	0.990156	NaN	NaN	NaN	4198500	8339900	NaN	NaN	3	3	3	1.8	1.8	1.8	192.01	0	4.0853	7032500	4	0	3	0	0	3	0	74813	0	0
Q8R0F3	Q8R0F3	Sulfatase-modifying factor 1	Sumf1	1.99606	0.997157	NaN	1	0.997157	NaN	NaN	777280	1551500	NaN	1135500	NaN	96435	2	2	2	7.3	7.3	7.3	40.659	0	166.65	18976000	9	2	1	2	2	1	1	862530	0	0
P61161	P61161	Actin-related protein 2	Actr2	2.02301	1.01651	NaN	1	NaN	1.01651	NaN	NaN	607520	2033600	4114000	NaN	NaN	2	2	2	7.9	7.9	7.9	44.76	0	4.5695	10178000	6	1	2	0	2	2	0	484690	0	0
P35505	P35505	Fumarylacetoacetase	Fah	2.04811	1.03429	NaN	1	1.03429	NaN	NaN	541720	1109500	NaN	897040	NaN	NaN	2	2	2	6.7	6.7	6.7	46.175	0	111.43	9546000	8	2	0	0	2	1	0	397750	0	0
Q66K08	Q66K08	Cartilage intermediate layer protein 1;Cartilage intermediate layer protein 1 C1;Cartilage intermediate layer protein 1 C2	Cilp	2.12053	1.08442	NaN	1	1.08442	NaN	NaN	96443	204510	NaN	NaN	NaN	NaN	2	2	2	2.4	2.4	2.4	132.33	0	6.3727	1478000	3	2	0	0	2	0	0	23094	0	0
P16546	P16546	Spectrin alpha chain, non-erythrocytic 1	Sptan1	2.13008	1.09091	NaN	1	NaN	1.09091	NaN	NaN	NaN	11078000	23597000	NaN	827430	4	4	3	1.9	1.9	1.6	284.59	0	12.93	32033000	6	0	2	1	0	2	2	168600	0	0
O89017	O89017	Legumain	Lgmn	2.31787	1.2128	NaN	1	1.2128	NaN	NaN	139430	323180	NaN	1186500	NaN	NaN	2	2	2	6.9	6.9	6.9	49.372	0	81.832	21791000	4	2	1	0	2	1	0	990520	0	0
Q91Z92	Q91Z92	Beta-1,3-galactosyltransferase 6	B3galt6	2.48966	1.31595	NaN	1	1.31595	NaN	NaN	156190	388860	NaN	NaN	NaN	NaN	2	2	2	8.6	8.6	8.6	37.021	0	4.2677	2425600	2	2	0	0	2	0	0	115500	0	0
P05017	P05017	Insulin-like growth factor I	Igf1	2.53758	1.34345	NaN	1	NaN	NaN	1.34345	NaN	NaN	NaN	NaN	443730	1126000	2	2	2	9.2	9.2	9.2	17.093	0	9.7579	5500300	10	0	0	2	0	0	2	687540	0	0
P55264	P55264	Adenosine kinase	Adk	2.54031	1.345	NaN	1	NaN	1.345	NaN	NaN	211810	2537800	6446800	NaN	NaN	2	2	2	5	5	5	40.148	0	6.7405	9570100	3	1	2	0	1	2	0	435010	0	0
Q9Z0F8	Q9Z0F8	Disintegrin and metalloproteinase domain-containing protein 17	Adam17	2.62992	1.39502	NaN	1	NaN	1.39502	NaN	NaN	264700	2464900	6482500	NaN	NaN	3	3	3	5.4	5.4	5.4	93.055	0	5.7315	3148800	5	0	2	0	1	3	0	60555	0	0
P97315	P97315	Cysteine and glycine-rich protein 1	Csrp1	2.6845	1.42466	NaN	1	NaN	1.42466	NaN	NaN	191080	11119000	29849000	NaN	497010	3	3	3	15.5	15.5	15.5	20.583	0	14.98	14555000	9	1	2	1	1	2	2	970310	0	0
Q8R2G6	Q8R2G6	Coiled-coil domain-containing protein 80	Ccdc80	2.71111	1.43888	NaN	1	NaN	1.43888	NaN	NaN	205410	3915000	10614000	NaN	NaN	2	2	2	2.6	2.6	2.6	107.61	0	63.234	9012300	6	1	2	0	1	2	0	163860	0	0
P47811	P47811	Mitogen-activated protein kinase 14	Mapk14	2.88687	1.5295	NaN	1	1.5295	NaN	NaN	90257	260560	NaN	NaN	NaN	NaN	1	1	1	5.6	5.6	5.6	41.287	0	6.6013	1652400	2	1	0	0	1	0	0	91798	0	0
Q9Z0J7	Q9Z0J7	Growth/differentiation factor 15	Gdf15	2.96039	1.56579	NaN	1	NaN	1.56579	NaN	NaN	NaN	4494000	13304000	NaN	NaN	4	4	4	16.2	16.2	16.2	33.225	0.001912	2.8933	4444400	6	0	3	0	0	3	0	222220	0	0
P97427;Q62188	P97427;Q62188	Dihydropyrimidinase-related protein 1;Dihydropyrimidinase-related protein 3	Crmp1;Dpysl3	3.03641	1.60237	NaN	1	NaN	1.60237	NaN	NaN	75361	3732700	11334000	NaN	1112700	3	3	2	7.3	7.3	5.1	62.167	0.0065056	2.5506	36401000	17	1	2	1	1	2	1	1011100	0	0
P00493	P00493	Hypoxanthine-guanine phosphoribosyltransferase	Hprt1	3.04057	1.60434	NaN	1	1.60434	NaN	NaN	628600	1911300	NaN	6807300	NaN	NaN	2	2	2	11	11	11	24.57	0	4.7867	7683600	6	2	1	0	2	1	0	591040	0	0
Q9CYL5	Q9CYL5	Golgi-associated plant pathogenesis-related protein 1	Glipr2	3.39007	1.76131	NaN	1	NaN	NaN	1.76131	NaN	NaN	NaN	NaN	432410	1465900	3	3	3	26.6	26.6	26.6	17.09	0	98.851	4647100	8	0	0	2	0	1	2	464710	0	0
Q9QXS1	Q9QXS1	Plectin	Plec	3.53828	1.82305	NaN	1	NaN	1.82305	NaN	NaN	25312	2436100	8619600	NaN	244020	4	4	4	0.8	0.8	0.8	534.18	0	4.896	4458200	6	0	2	0	1	2	1	12922	0	0
P46412	P46412	Glutathione peroxidase 3	Gpx3	3.65485	1.86981	NaN	1	NaN	1.86981	NaN	NaN	NaN	782550	2860100	NaN	NaN	2	2	2	12.8	12.8	12.8	25.424	0	11.683	930140	2	0	2	0	0	2	0	77512	0	0
Q9EQF5	Q9EQF5	Dihydropyrimidinase	Dpys	4.29614	2.10304	NaN	1	2.10304	NaN	NaN	586620	2520200	NaN	NaN	NaN	NaN	2	2	2	4.2	4.2	4.2	56.724	0.0095486	2.0581	78137000	4	2	0	0	2	0	0	2604600	0	0
O70589	O70589	Peripheral plasma membrane protein CASK	Cask	5.54957	2.47238	NaN	1	NaN	2.47238	NaN	NaN	393800	7534100	41811000	NaN	NaN	2	2	2	4.1	4.1	4.1	105.11	0	23.091	49288000	4	0	2	0	1	2	0	880150	0	0
G5E829	G5E829	Plasma membrane calcium-transporting ATPase 1	Atp2b1	NaN	NaN	NaN	0	NaN	NaN	NaN	NaN	NaN	NaN	NaN	NaN	NaN	1	1	1	1.6	1.6	1.6	134.75	0.0090334	2.2801	0	2	0	0	0	0	1	0	0	0	0
O08545	O08545	Ephrin-A3	Efna3	NaN	NaN	NaN	0	NaN	NaN	NaN	NaN	NaN	NaN	2020500	NaN	NaN	1	1	1	8.3	8.3	8.3	25.632	0	3.1532	4190900	1	0	1	0	0	1	0	465660	0	0
O08553	O08553	Dihydropyrimidinase-related protein 2	Dpysl2	NaN	NaN	NaN	0	NaN	NaN	NaN	71184	NaN	9567000	NaN	NaN	1457200	3	2	2	8.7	6.5	6.5	62.277	0	3.9597	14027000	6	1	1	1	1	1	2	412560	0	0
O08710	O08710	Thyroglobulin	Tg	NaN	NaN	NaN	0	NaN	NaN	NaN	NaN	275460	NaN	6880300	NaN	NaN	2	2	2	0.7	0.7	0.7	304.47	0	4.1289	12553000	6	1	1	0	2	2	0	102060	0	0
O08712	O08712	Tumor necrosis factor receptor superfamily member 11B	Tnfrsf11b	NaN	NaN	NaN	0	NaN	NaN	NaN	NaN	28429	NaN	NaN	NaN	NaN	1	1	1	4.2	4.2	4.2	45.923	0.0073869	2.458	1986000	1	1	0	0	1	0	0	68482	0	0
O08807	O08807	Peroxiredoxin-4	Prdx4	NaN	NaN	NaN	0	NaN	NaN	NaN	6469600	NaN	151330000	NaN	NaN	80406	2	1	1	6.9	4	4	31.052	0	10.347	125190000	16	1	1	1	1	1	1	7363900	0	0
O08852	O08852	Polycystin-1	Pkd1	NaN	NaN	NaN	0	NaN	NaN	NaN	NaN	98238	NaN	1164100	NaN	NaN	2	2	2	0.4	0.4	0.4	466.57	0.0098921	2.2485	2626700	5	2	1	0	2	1	0	17629	0	0
O09165	O09165	Calsequestrin-1	Casq1	NaN	NaN	NaN	0	NaN	NaN	NaN	NaN	NaN	1032400	NaN	NaN	NaN	1	1	1	3.2	3.2	3.2	46.377	0	14.389	573990	1	0	1	0	0	0	0	38266	0	0
O35206	O35206	Collagen alpha-1(XV) chain;Restin	Col15a1	NaN	NaN	NaN	0	NaN	NaN	NaN	NaN	113750	NaN	NaN	NaN	NaN	1	1	1	1.1	1.1	1.1	140.47	0.0090662	2.2889	660290	1	1	0	0	1	0	0	13206	0	0
O35295	O35295	Transcriptional activator protein Pur-beta	Purb	NaN	NaN	NaN	0	NaN	NaN	NaN	NaN	111040	NaN	1354800	NaN	NaN	2	2	2	12	12	12	33.901	0	65.477	2791000	3	1	1	0	1	1	0	186070	0	0
O35448	O35448	Lysosomal thioesterase PPT2	Ppt2	NaN	NaN	NaN	0	NaN	NaN	NaN	NaN	345170	NaN	NaN	NaN	NaN	1	1	1	6	6	6	34.366	0	3.6478	2043700	1	0	0	0	1	0	0	170310	0	0
O35608	O35608	Angiopoietin-2	Angpt2	NaN	NaN	NaN	0	NaN	NaN	NaN	489630	NaN	3859200	NaN	NaN	NaN	1	1	1	2.8	2.8	2.8	56.575	0	3.7733	11082000	5	1	1	0	1	0	0	357490	0	0
O55131;Q8C650	O55131	Septin-7	2007-09-01	NaN	NaN	NaN	0	NaN	NaN	NaN	NaN	346120	NaN	1564100	NaN	NaN	4	4	3	10.3	10.3	8.3	50.549	0	3.4461	8464500	2	1	2	0	1	2	0	313500	0	0
O55234	O55234	Proteasome subunit beta type-5	Psmb5	NaN	NaN	NaN	0	NaN	NaN	NaN	NaN	1186100	164300	NaN	NaN	NaN	3	3	3	13.3	13.3	13.3	28.532	0	9.5387	4504300	4	1	1	0	3	0	0	264960	0	0
O70354	O70354	Carbonic anhydrase-related protein 11	Ca11	NaN	NaN	NaN	0	NaN	NaN	NaN	NaN	347140	NaN	NaN	NaN	NaN	2	2	2	11.6	11.6	11.6	36.051	0.0098302	2.2131	1905300	1	0	0	0	2	0	0	136090	0	0
O70400	O70400	PDZ and LIM domain protein 1	Pdlim1	NaN	NaN	NaN	0	NaN	NaN	NaN	NaN	486870	NaN	1222800	NaN	NaN	1	1	1	4.6	4.6	4.6	35.774	0	6.5441	4647300	4	1	1	0	1	1	0	244600	0	0
O70562;O70558;O70555;O70554;O70559	O70562;O70558;O70555;O70554;O70559	Small proline-rich protein 2K;Small proline-rich protein 2G;Small proline-rich protein 2D;Small proline-rich protein 2B;Small proline-rich protein 2H	Sprr2k;Sprr2g;Sprr2d;Sprr2b;Sprr2h	NaN	NaN	NaN	0	NaN	NaN	NaN	286290	NaN	10984000	NaN	122640	NaN	1	1	1	13.2	13.2	13.2	7.4989	0.0082873	2.4462	10096000	12	1	1	1	0	1	0	1682700	0	0
O70591	O70591	Prefoldin subunit 2	Pfdn2	NaN	NaN	NaN	0	NaN	NaN	NaN	NaN	NaN	NaN	1525500	NaN	NaN	1	1	1	9.1	9.1	9.1	16.534	0	6.2575	732890	2	0	1	0	0	1	0	61075	0	0
O88200	O88200	C-type lectin domain family 11 member A	Clec11a	NaN	NaN	NaN	0	NaN	NaN	NaN	NaN	NaN	3407500	NaN	NaN	NaN	2	2	2	6.1	6.1	6.1	36.451	0	3.9376	4789800	2	0	2	0	0	1	0	252100	0	0
O88543	O88543	COP9 signalosome complex subunit 3	Cops3	NaN	NaN	NaN	0	NaN	NaN	NaN	NaN	164130	NaN	512920	NaN	NaN	1	1	1	2.8	2.8	2.8	47.832	0	15	2155700	3	1	0	0	1	1	0	79842	0	0
O88829	O88829	Lactosylceramide alpha-2,3-sialyltransferase	St3gal5	NaN	NaN	NaN	0	NaN	NaN	NaN	NaN	NaN	NaN	NaN	NaN	102330	1	1	1	3.6	3.6	3.6	47.359	0	11.821	3334600	2	0	0	1	0	0	1	138940	0	0
O88990	O88990	Alpha-actinin-3	Actn3	NaN	NaN	NaN	0	NaN	NaN	NaN	NaN	NaN	36047000	NaN	NaN	NaN	18	7	7	21.6	9.2	9.2	103.04	0	90.544	20041000	7	0	7	0	0	0	0	345540	0	0
O88992	O88992	C1q-related factor	C1ql1	NaN	NaN	NaN	0	NaN	NaN	NaN	568140	NaN	NaN	3513300	NaN	NaN	2	1	1	16.3	11.2	11.2	26.499	0	20.288	3880900	4	1	1	0	1	1	0	277210	0	0
O89001	O89001	Carboxypeptidase D	Cpd	NaN	NaN	NaN	0	NaN	NaN	NaN	NaN	NaN	NaN	4665400	NaN	NaN	1	1	1	2.1	2.1	2.1	152.4	0.0097431	2.1874	2865200	4	0	1	0	0	1	0	38720	0	0
P01786;P01790;P01789;P01794;P01793;P01792;P01791;P01788;P01787	P01786;P01790;P01789;P01794;P01793;P01792;P01791;P01788;P01787	Ig heavy chain V region MOPC 47A;Ig heavy chain V region M511;Ig heavy chain V region M603;Ig heavy chain V region HPCG14;Ig heavy chain V region HPCG13;Ig heavy chain V region HPCG8;Ig heavy chain V region HPCM6;Ig heavy chain V region H8;Ig heavy chain V regions TEPC 15/S107/HPCM1/HPCM2/HPCM3		NaN	NaN	NaN	0	NaN	NaN	NaN	NaN	NaN	3424800	NaN	41977	NaN	2	2	2	16.2	16.2	16.2	12.374	0.0056391	2.6604	2746600	2	0	1	1	0	0	0	686660	0	0
P01942	P01942	Hemoglobin subunit alpha	Hba	NaN	NaN	NaN	0	NaN	NaN	NaN	NaN	527850	NaN	487570	NaN	NaN	2	1	1	16.9	10.6	10.6	15.085	0.0082569	2.4083	2119200	2	0	1	0	1	1	0	264900	0	0
P05977	P05977	Myosin light chain 1/3, skeletal muscle isoform	Myl1	NaN	NaN	NaN	0	NaN	NaN	NaN	NaN	NaN	202380000	NaN	NaN	NaN	9	9	7	35.1	35.1	30.3	20.594	0	45.972	114640000	9	0	7	0	0	1	0	9553500	0	0
P06802	P06802	Ectonucleotide pyrophosphatase/phosphodiesterase family member 1;Alkaline phosphodiesterase I;Nucleotide pyrophosphatase	Enpp1	NaN	NaN	NaN	0	NaN	NaN	NaN	NaN	NaN	5376500	NaN	NaN	NaN	2	2	2	5.2	5.2	5.2	103.17	0	12.929	2102000	2	0	2	0	0	1	0	44723	0	0
P07091	P07091	Protein S100-A4	S100a4	NaN	NaN	NaN	0	NaN	NaN	NaN	94316	NaN	NaN	NaN	NaN	NaN	1	1	1	16.8	16.8	16.8	11.721	0.0037807	2.695	355300	3	1	0	0	1	0	0	71061	0	0
P07309	P07309	Transthyretin	Ttr	NaN	NaN	NaN	0	NaN	NaN	NaN	NaN	400760	18822000	NaN	NaN	NaN	2	2	2	12.2	12.2	12.2	15.776	0.0064995	2.5495	18711000	4	1	1	0	1	1	0	1871100	0	0
P07724	P07724	Serum albumin	Alb	NaN	NaN	NaN	0	NaN	NaN	NaN	NaN	309430000	NaN	1594700000	NaN	837810	5	3	3	7.7	6.2	6.2	68.692	0	4.7587	6349100000	46	1	2	1	2	1	1	147650000	0	0
P07742	P07742	Ribonucleoside-diphosphate reductase large subunit	Rrm1	NaN	NaN	NaN	0	NaN	NaN	NaN	NaN	NaN	NaN	3294400	NaN	NaN	1	1	1	1.6	1.6	1.6	90.209	0.0019249	2.9539	3089500	2	0	1	0	0	1	0	70216	0	0
P09103	P09103	Protein disulfide-isomerase	P4hb	NaN	NaN	NaN	0	NaN	NaN	NaN	NaN	64068	NaN	NaN	NaN	NaN	1	1	1	2	2	2	57.058	0.0095569	2.0705	1615400	1	0	0	0	1	0	0	41420	0	0
P09541	P09541	Myosin light chain 4	Myl4	NaN	NaN	NaN	0	NaN	NaN	NaN	NaN	NaN	857440	NaN	NaN	NaN	2	1	1	11.4	6.7	6.7	21.159	0	3.9815	476720	1	0	1	0	0	0	0	36670	0	0
P09542	P09542	Myosin light chain 3	Myl3	NaN	NaN	NaN	0	NaN	NaN	NaN	NaN	NaN	15753000	NaN	NaN	NaN	2	1	1	10.3	6.4	6.4	22.421	0	4.005	8758100	1	0	1	0	0	0	0	673700	0	0
P0C6F1	P0C6F1	Dynein heavy chain 2, axonemal	Dnah2	NaN	NaN	NaN	0	NaN	NaN	NaN	NaN	257620	NaN	2890100	NaN	111550	4	4	4	1.1	1.1	1.1	511.56	0.0065177	2.5628	7904400	3	1	0	1	2	1	1	29828	0	0
P10630;Q91VC3	P10630	Eukaryotic initiation factor 4A-II;Eukaryotic initiation factor 4A-II, N-terminally processed	Eif4a2	NaN	NaN	NaN	0	NaN	NaN	NaN	NaN	NaN	NaN	633390	NaN	45994	6	6	2	22.9	22.9	7.1	46.402	0	14.203	3938400	3	0	1	1	0	1	1	164100	0	0
P10649;Q80W21;P15626;O35660	P10649;Q80W21;P15626	Glutathione S-transferase Mu 1;Glutathione S-transferase Mu 7;Glutathione S-transferase Mu 2	Gstm1;Gstm7;Gstm2	NaN	NaN	NaN	0	NaN	NaN	NaN	NaN	495830	NaN	1438500	NaN	NaN	3	2	1	13.3	9.2	5.5	25.97	0	9.8587	2326900	3	1	1	0	1	1	0	136880	0	0
P10810	P10810	Monocyte differentiation antigen CD14	Cd14	NaN	NaN	NaN	0	NaN	NaN	NaN	NaN	47998	NaN	NaN	NaN	NaN	1	1	1	5.2	5.2	5.2	39.203	0	41.269	1210200	1	0	0	0	1	0	0	71189	0	0
Q6ZWY9;Q64525;Q64478;P10854	Q6ZWY9;Q64525;Q64478;P10854	Histone H2B type 1-C/E/G;Histone H2B type 2-B;Histone H2B type 1-H;Histone H2B type 1-M	Hist1h2bc;Hist2h2bb;Hist1h2bh;Hist1h2bm	NaN	NaN	NaN	0	NaN	NaN	NaN	NaN	NaN	NaN	NaN	NaN	231550	11	11	1	59.5	59.5	17.5	13.906	0	142.37	9297100	2	0	0	1	0	0	1	845190	0	0
P10923	P10923	Osteopontin	Spp1	NaN	NaN	NaN	0	NaN	NaN	NaN	NaN	1605600	NaN	11237000	544190	NaN	2	2	2	7.5	7.5	7.5	32.459	0	4.4632	49644000	15	1	1	1	1	2	1	4137000	0	0
P11214	P11214	Tissue-type plasminogen activator;Tissue-type plasminogen activator chain A;Tissue-type plasminogen activator chain B	Plat	NaN	NaN	NaN	0	NaN	NaN	NaN	NaN	1047600	NaN	2137100	NaN	NaN	2	2	2	4.3	4.3	4.3	63.096	0.0019157	2.9007	5146100	4	1	0	0	2	1	0	166000	0	0
P11247	P11247	Myeloperoxidase;Myeloperoxidase light chain;Myeloperoxidase heavy chain	Mpo	NaN	NaN	NaN	0	NaN	NaN	NaN	NaN	NaN	NaN	NaN	57165	NaN	2	2	2	2.6	2.6	2.6	81.181	0.00096432	2.9893	1147300	2	0	0	2	0	0	0	22947	0	0
P11627	P11627	Neural cell adhesion molecule L1	L1cam	NaN	NaN	NaN	0	NaN	NaN	NaN	127760	NaN	NaN	NaN	NaN	NaN	1	1	1	1.9	1.9	1.9	140.97	0.0098832	2.2392	221770	4	1	0	0	1	0	0	3168.1	0	0
P11672	P11672	Neutrophil gelatinase-associated lipocalin	Lcn2	NaN	NaN	NaN	0	NaN	NaN	NaN	NaN	NaN	NaN	5762700	NaN	368580	3	3	3	17.5	17.5	17.5	22.875	0.0019084	2.8357	4338000	2	0	1	1	0	1	2	482000	0	0
P11688	P11688	Integrin alpha-5;Integrin alpha-5 heavy chain;Integrin alpha-5 light chain	Itga5	NaN	NaN	NaN	0	NaN	NaN	NaN	NaN	47135	NaN	1487700	NaN	NaN	2	2	2	2	2	2	115.04	0.0047037	2.6744	1792200	3	1	1	0	2	1	0	40732	0	0
P12961	P12961	Neuroendocrine protein 7B2;N-terminal peptide;C-terminal peptide	Scg5	NaN	NaN	NaN	0	NaN	NaN	NaN	NaN	119960	NaN	2734100	NaN	NaN	2	2	2	5.7	5.7	5.7	23.866	0.0082949	2.4477	1382300	2	0	1	0	1	1	0	153590	0	0
P13541;A2AQP0	P13541	Myosin-3	Myh3	NaN	NaN	NaN	0	NaN	NaN	NaN	NaN	NaN	8272400	NaN	NaN	NaN	31	2	2	12.9	1	1	223.79	0	3.5467	4599300	2	0	2	0	0	0	0	36215	0	0
P13542	P13542	Myosin-8	Myh8	NaN	NaN	NaN	0	NaN	NaN	NaN	NaN	NaN	148320000	NaN	NaN	NaN	69	16	9	30.1	8.6	4.6	222.7	0	323.31	83538000	16	0	9	0	0	1	0	663000	0	0
P13609	P13609	Serglycin	Srgn	NaN	NaN	NaN	0	NaN	NaN	NaN	NaN	176080	NaN	2527800	NaN	525850	1	1	1	10.5	10.5	10.5	16.711	0	3.2044	6954000	5	0	1	1	1	1	1	1390800	0	0
P14426	P14426	H-2 class I histocompatibility antigen, D-K alpha chain	H2-D1	NaN	NaN	NaN	0	NaN	NaN	NaN	NaN	NaN	NaN	2891700	NaN	NaN	2	1	1	6.4	3.9	3.9	40.619	0	84.504	3631200	1	0	0	0	0	1	0	157880	0	0
P15247	P15247	Interleukin-9	Il9	NaN	NaN	NaN	0	NaN	NaN	NaN	2113900	NaN	NaN	NaN	NaN	NaN	1	1	1	6.9	6.9	6.9	16.075	0.0082797	2.4344	40339000	2	1	0	0	1	0	0	3667200	0	0
P15535	P15535	Beta-1,4-galactosyltransferase 1;Lactose synthase A protein;N-acetyllactosamine synthase;Beta-N-acetylglucosaminylglycopeptide beta-1,4-galactosyltransferase;Beta-N-acetylglucosaminyl-glycolipid beta-1,4-galactosyltransferase;Processed beta-1,4-galactosyltransferase 1	B4galt1	NaN	NaN	NaN	0	NaN	NaN	NaN	NaN	NaN	NaN	NaN	NaN	59482	1	1	1	5.3	5.3	5.3	44.411	0.0097952	2.1956	2291700	1	0	0	1	0	0	1	104170	0	0
P16406	P16406	Glutamyl aminopeptidase	Enpep	NaN	NaN	NaN	0	NaN	NaN	NaN	NaN	NaN	5315400	NaN	NaN	18736	1	1	1	1.3	1.3	1.3	107.96	0.0064755	2.5054	4783700	2	0	1	0	0	1	1	78422	0	0
P17095	P17095	High mobility group protein HMG-I/HMG-Y	Hmga1	NaN	NaN	NaN	0	NaN	NaN	NaN	NaN	NaN	NaN	NaN	116910	NaN	1	1	1	23.4	23.4	23.4	11.614	0	3.1575	668600	5	0	0	1	0	0	0	111430	0	0
P17125	P17125	Transforming growth factor beta-3;Latency-associated peptide	Tgfb3	NaN	NaN	NaN	0	NaN	NaN	NaN	257930	NaN	NaN	NaN	NaN	522000	2	2	2	6.3	6.3	6.3	46.884	0.0019194	2.9077	3055600	3	1	0	1	0	0	2	138890	0	0
P17439	P17439	Glucosylceramidase	Gba	NaN	NaN	NaN	0	NaN	NaN	NaN	NaN	77071	NaN	NaN	NaN	NaN	1	1	1	2.5	2.5	2.5	57.621	0	6.0844	509160	1	1	0	0	1	0	0	21215	0	0
P17742	P17742	Peptidyl-prolyl cis-trans isomerase A;Peptidyl-prolyl cis-trans isomerase A, N-terminally processed	Ppia	NaN	NaN	NaN	0	NaN	NaN	NaN	79000	NaN	NaN	885040	213050	NaN	3	3	3	22	22	22	17.971	0	6.7324	2239500	5	1	1	2	0	1	1	159960	0	0
P19123	P19123	Troponin C, slow skeletal and cardiac muscles	Tnnc1	NaN	NaN	NaN	0	NaN	NaN	NaN	NaN	NaN	9192400	NaN	NaN	NaN	3	3	3	16.8	16.8	16.8	18.42	0	24.134	5110700	3	0	3	0	0	0	0	730110	0	0
P20801	P20801	Troponin C, skeletal muscle	Tnnc2	NaN	NaN	NaN	0	NaN	NaN	NaN	NaN	NaN	8838500	NaN	NaN	NaN	2	2	2	15.6	15.6	15.6	18.11	0.009839	2.2273	4914000	2	0	2	0	0	0	0	446730	0	0
P20918	P20918	Plasminogen;Plasmin heavy chain A;Activation peptide;Angiostatin;Plasmin heavy chain A, short form;Plasmin light chain B	Plg	NaN	NaN	NaN	0	NaN	NaN	NaN	NaN	6702100	NaN	10834000	NaN	NaN	6	1	1	7	1.5	1.5	90.807	0	35.986	30802000	17	1	1	0	1	1	0	616030	0	0
P21550	P21550	Beta-enolase	Eno3	NaN	NaN	NaN	0	NaN	NaN	NaN	NaN	NaN	102490000	NaN	NaN	NaN	13	9	9	37.8	21.9	21.9	47.024	0	51.586	68706000	11	0	9	0	0	0	0	2369200	0	0
Q8CGP6;Q8R1M2;Q8CGP7;Q8CGP5;Q8BFU2;P22752;Q3THW5;P0C0S6;Q64522;P27661	Q8CGP6;Q8R1M2;Q8CGP7;Q8CGP5;Q8BFU2;P22752	Histone H2A type 1-H;Histone H2A.J;Histone H2A type 1-K;Histone H2A type 1-F;Histone H2A type 3;Histone H2A type 1	Hist1h2ah;H2afj;Hist1h2ak;Hist1h2af;Hist3h2a;Hist1h2ab	NaN	NaN	NaN	0	NaN	NaN	NaN	NaN	NaN	NaN	NaN	359610	NaN	3	1	1	35.9	14.1	14.1	13.95	0	4.2767	2569400	4	0	0	1	0	0	0	367050	0	0
P23188	P23188	Furin	Furin	NaN	NaN	NaN	0	NaN	NaN	NaN	NaN	356590	NaN	7543800	NaN	NaN	3	3	3	4.2	4.2	4.2	86.771	0	3.4053	5337700	5	1	1	0	3	1	0	140460	0	0
P23780	P23780	Beta-galactosidase	Glb1	NaN	NaN	NaN	0	NaN	NaN	NaN	NaN	NaN	6941300	NaN	NaN	NaN	1	1	1	1.9	1.9	1.9	73.12	0.00096712	3.0178	3200000	1	0	1	0	0	1	0	100000	0	0
P24270	P24270	Catalase	Cat	NaN	NaN	NaN	0	NaN	NaN	NaN	NaN	17740	11227000	NaN	NaN	NaN	1	1	1	2.5	2.5	2.5	59.795	0.0095156	2.0323	7201400	9	0	1	0	1	1	0	205750	0	0
P26041;P26043;P26040	P26041;P26043;P26040	Moesin;Radixin;Ezrin	Msn;Rdx;Ezr	NaN	NaN	NaN	0	NaN	NaN	NaN	115200	NaN	NaN	NaN	201320	NaN	2	2	2	3.5	3.5	3.5	67.766	0.00096899	3.0348	2427300	2	1	0	1	0	0	1	62238	0	0
P26231	P26231	Catenin alpha-1	Ctnna1	NaN	NaN	NaN	0	NaN	NaN	NaN	NaN	287760	NaN	NaN	NaN	NaN	2	2	2	4.5	4.5	4.5	100.11	0	13.08	571310	4	0	0	0	2	0	0	10387	0	0
P26516	P26516	26S proteasome non-ATPase regulatory subunit 7	Psmd7	NaN	NaN	NaN	0	NaN	NaN	NaN	NaN	196660	NaN	NaN	NaN	NaN	2	2	2	11.5	11.5	11.5	36.539	0	5.4316	1079300	2	0	0	0	2	0	0	71957	0	0
P28667	P28667	MARCKS-related protein	Marcksl1	NaN	NaN	NaN	0	NaN	NaN	NaN	NaN	NaN	NaN	1844800	NaN	NaN	1	1	1	6.5	6.5	6.5	20.165	0.0094746	2.0141	2316600	1	0	0	0	0	1	0	289570	0	0
P28738;Q61768;P33175	P28738;Q61768;P33175	Kinesin heavy chain isoform 5C;Kinesin-1 heavy chain;Kinesin heavy chain isoform 5A	Kif5c;Kif5b;Kif5a	NaN	NaN	NaN	0	NaN	NaN	NaN	NaN	NaN	NaN	1030600	NaN	NaN	1	1	1	1.3	1.3	1.3	109.27	0	3.2837	501400	1	0	1	0	0	1	0	7713.8	0	0
P30412	P30412	Peptidyl-prolyl cis-trans isomerase C	Ppic	NaN	NaN	NaN	0	NaN	NaN	NaN	NaN	1971500	13066000	NaN	NaN	NaN	3	3	3	18.9	18.9	18.9	22.794	0	8.0817	10420000	7	1	2	0	1	2	0	694700	0	0
P30681	P30681	High mobility group protein B2	Hmgb2	NaN	NaN	NaN	0	NaN	NaN	NaN	NaN	NaN	NaN	NaN	170760	NaN	1	1	1	7.6	7.6	7.6	24.162	0.0019231	2.9331	759770	1	0	0	1	0	0	0	69070	0	0
P31001	P31001	Desmin	Des	NaN	NaN	NaN	0	NaN	NaN	NaN	NaN	NaN	NaN	610260	NaN	NaN	2	1	1	5.1	3.2	3.2	53.497	0	42.177	1751600	1	0	1	0	0	1	0	48655	0	0
P35293	P35293	Ras-related protein Rab-18	Rab18	NaN	NaN	NaN	0	NaN	NaN	NaN	117830	NaN	NaN	3100200	NaN	NaN	2	2	2	10.7	10.7	10.7	23.035	0	3.2671	1502600	4	1	1	0	0	1	0	107330	0	0
P35917	P35917	Vascular endothelial growth factor receptor 3	Flt4	NaN	NaN	NaN	0	NaN	NaN	NaN	677660	NaN	NaN	13974000	NaN	NaN	1	1	1	1.3	1.3	1.3	153.01	0	6.6616	28446000	7	1	1	0	1	1	0	400650	0	0
P35979	P35979	60S ribosomal protein L12	Rpl12	NaN	NaN	NaN	0	NaN	NaN	NaN	NaN	NaN	NaN	NaN	31298	NaN	1	1	1	9.1	9.1	9.1	17.804	0	14.486	179000	2	0	0	1	0	0	0	16272	0	0
P39054;P39053	P39054;P39053	Dynamin-2;Dynamin-1	Dnm2;Dnm1	NaN	NaN	NaN	0	NaN	NaN	NaN	NaN	NaN	NaN	NaN	NaN	NaN	2	2	1	3.4	3.4	1.7	98.144	0	3.9735	0	1	1	0	0	0	0	0	0	0	0
P40124	P40124	Adenylyl cyclase-associated protein 1	Cap1	NaN	NaN	NaN	0	NaN	NaN	NaN	NaN	224430	NaN	3173500	111970	NaN	4	4	4	12.7	12.7	12.7	51.564	0	5.9112	17660000	6	1	1	2	2	1	1	551860	0	0
P41731	P41731	CD63 antigen	Cd63	NaN	NaN	NaN	0	NaN	NaN	NaN	NaN	3215600	NaN	NaN	NaN	NaN	1	1	1	4.2	4.2	4.2	25.766	0	3.1727	31639000	3	1	0	0	1	0	0	3515400	0	0
P42208	P42208	Septin-2	2002-09-01	NaN	NaN	NaN	0	NaN	NaN	NaN	NaN	250330	NaN	3633700	NaN	NaN	2	2	2	8.6	8.6	8.6	41.525	0	12.565	7948000	7	1	2	0	1	1	0	361270	0	0
P42227	P42227	Signal transducer and activator of transcription 3	Stat3	NaN	NaN	NaN	0	NaN	NaN	NaN	NaN	NaN	NaN	3494000	NaN	NaN	1	1	1	3.4	3.4	3.4	88.053	0.0037771	2.6945	3348500	2	0	1	0	0	1	0	69761	0	0
P42669	P42669	Transcriptional activator protein Pur-alpha	Pura	NaN	NaN	NaN	0	NaN	NaN	NaN	NaN	101080	NaN	NaN	NaN	NaN	1	1	1	7.2	7.2	7.2	34.883	0	4.8647	907940	1	1	0	0	1	0	0	64853	0	0
P43275	P43275	Histone H1.1	Hist1h1a	NaN	NaN	NaN	0	NaN	NaN	NaN	NaN	NaN	NaN	NaN	1723300	NaN	2	2	2	10.3	10.3	10.3	21.785	0	36.276	2195800	2	0	0	2	0	0	1	274480	0	0
P62492;P46638	P62492;P46638	Ras-related protein Rab-11A;Ras-related protein Rab-11B	Rab11a;Rab11b	NaN	NaN	NaN	0	NaN	NaN	NaN	NaN	57258	NaN	3495300	NaN	NaN	2	2	2	10.6	10.6	10.6	24.393	0.005618	2.6059	1625800	3	1	1	0	1	1	0	108390	0	0
P47857	P47857	ATP-dependent 6-phosphofructokinase, muscle type	Pfkm	NaN	NaN	NaN	0	NaN	NaN	NaN	NaN	NaN	5207300	NaN	NaN	NaN	4	4	3	5.1	5.1	4	85.268	0	8.0148	2895100	3	0	3	0	0	0	0	72378	0	0
P47931	P47931	Follistatin	Fst	NaN	NaN	NaN	0	NaN	NaN	NaN	NaN	190000	NaN	NaN	80507	NaN	4	4	4	10.2	10.2	10.2	37.866	0	9.9889	4731700	4	1	0	2	1	0	2	236580	0	0
P47955	P47955	60S acidic ribosomal protein P1	Rplp1	NaN	NaN	NaN	0	NaN	NaN	NaN	NaN	NaN	313560	NaN	NaN	NaN	1	1	1	28.1	28.1	28.1	11.475	0	12.9	313560	1	0	1	0	0	0	0	78390	0	0
P49764	P49764	Placenta growth factor	Pgf	NaN	NaN	NaN	0	NaN	NaN	NaN	NaN	NaN	NaN	11965000	NaN	NaN	2	2	2	21.5	21.5	21.5	17.876	0	6.4978	6025100	5	0	1	0	0	2	0	1004200	0	0
P50396	P50396	Rab GDP dissociation inhibitor alpha	Gdi1	NaN	NaN	NaN	0	NaN	NaN	NaN	NaN	244110	NaN	205930	NaN	28560	4	2	2	11.4	6.9	6.9	50.521	0	14.65	2754200	4	1	1	0	1	1	1	102010	0	0
P50543	P50543	Protein S100-A11	S100a11	NaN	NaN	NaN	0	NaN	NaN	NaN	85354	NaN	NaN	NaN	NaN	NaN	1	1	1	16.3	16.3	16.3	11.083	0	6.0071	286050	1	1	0	0	0	0	0	57211	0	0
P51150	P51150	Ras-related protein Rab-7a	Rab7a	NaN	NaN	NaN	0	NaN	NaN	NaN	214670	NaN	2207400	NaN	NaN	NaN	2	2	2	13	13	13	23.489	0	139.62	1928000	5	2	1	0	1	1	0	113410	0	0
P51881	P51881	ADP/ATP translocase 2;ADP/ATP translocase 2, N-terminally processed	Slc25a5	NaN	NaN	NaN	0	NaN	NaN	NaN	NaN	NaN	NaN	568070	NaN	63643	1	1	1	7.4	7.4	7.4	32.931	0	13.695	2098300	6	0	1	1	0	1	1	99918	0	0
P53994	P53994	Ras-related protein Rab-2A	Rab2a	NaN	NaN	NaN	0	NaN	NaN	NaN	NaN	230310	NaN	9459100	NaN	NaN	2	2	2	14.2	14.2	14.2	23.547	0	29.798	22421000	7	1	1	0	1	2	0	1494700	0	0
P56480	P56480	ATP synthase subunit beta, mitochondrial	Atp5b	NaN	NaN	NaN	0	NaN	NaN	NaN	NaN	NaN	1197400	NaN	NaN	NaN	1	1	1	2.6	2.6	2.6	56.3	0	4.2389	665710	1	0	1	0	0	0	0	22190	0	0
P58771	P58771	Tropomyosin alpha-1 chain	Tpm1	NaN	NaN	NaN	0	NaN	NaN	NaN	NaN	NaN	33613000	NaN	NaN	NaN	23	23	8	50	50	22.9	32.68	0	109.95	19140000	12	0	8	0	0	0	0	832190	0	0
P60487	P60487	Pyridoxal phosphate phosphatase	Pdxp	NaN	NaN	NaN	0	NaN	NaN	NaN	338610	NaN	NaN	2764400	NaN	NaN	1	1	1	5.8	5.8	5.8	31.512	0.0064695	2.4684	2776200	3	1	1	0	1	1	0	146120	0	0
P60867	P60867	40S ribosomal protein S20	Rps20	NaN	NaN	NaN	0	NaN	NaN	NaN	NaN	NaN	NaN	NaN	68867	NaN	1	1	1	15.1	15.1	15.1	13.373	0.0096322	2.1083	393860	2	0	0	1	0	0	0	65643	0	0
P61027;Q9DD03;P61028;P55258;Q8K386	P61027;Q9DD03;P61028;P55258;Q8K386	Ras-related protein Rab-10;Ras-related protein Rab-13;Ras-related protein Rab-8B;Ras-related protein Rab-8A;Ras-related protein Rab-15	Rab10;Rab13;Rab8b;Rab8a;Rab15	NaN	NaN	NaN	0	NaN	NaN	NaN	550670	NaN	2538600	NaN	NaN	NaN	2	1	1	11	5.5	5.5	22.541	0	9.7247	4564900	4	1	1	0	1	1	0	268530	0	0
P61202	P61202	COP9 signalosome complex subunit 2	Cops2	NaN	NaN	NaN	0	NaN	NaN	NaN	NaN	151030	NaN	NaN	NaN	NaN	1	1	1	5.6	5.6	5.6	51.596	0	9.3133	1066200	3	1	0	0	1	0	0	42650	0	0
P61759	P61759	Prefoldin subunit 3	Vbp1	NaN	NaN	NaN	0	NaN	NaN	NaN	NaN	124060	2258300	NaN	NaN	NaN	2	2	2	28.6	28.6	28.6	22.435	0	11.557	995030	2	0	1	0	1	0	0	66336	0	0
P62071	P62071	Ras-related protein R-Ras2	Rras2	NaN	NaN	NaN	0	NaN	NaN	NaN	NaN	NaN	NaN	3009400	NaN	NaN	1	1	1	5.9	5.9	5.9	23.399	0	49.167	1011200	2	0	1	0	0	1	0	67413	0	0
P62141	P62141	Serine/threonine-protein phosphatase PP1-beta catalytic subunit	Ppp1cb	NaN	NaN	NaN	0	NaN	NaN	NaN	NaN	NaN	NaN	1851600	NaN	NaN	5	2	2	23.5	7	7	37.186	0	6.9927	3088500	2	0	2	0	0	2	0	162550	0	0
P62821	P62821	Ras-related protein Rab-1A	Rab1A	NaN	NaN	NaN	0	NaN	NaN	NaN	NaN	NaN	NaN	1597300	NaN	NaN	4	4	2	24.9	24.9	14.6	22.677	0	4.5167	813080	1	0	1	0	0	2	0	45171	0	0
P62880	P62880	Guanine nucleotide-binding protein G(I)/G(S)/G(T) subunit beta-2	Gnb2	NaN	NaN	NaN	0	NaN	NaN	NaN	NaN	185290	NaN	5491800	NaN	NaN	5	3	2	14.7	8.8	8.8	37.331	0	8.4256	10268000	4	1	1	0	1	1	0	789820	0	0
P63001;Q05144;P60764	P63001	Ras-related C3 botulinum toxin substrate 1	Rac1	NaN	NaN	NaN	0	NaN	NaN	NaN	NaN	796060	1746800	NaN	NaN	NaN	4	4	4	20.3	20.3	20.3	21.45	0	4.5567	4847300	7	1	2	0	4	1	0	484730	0	0
P63158	P63158	High mobility group protein B1	Hmgb1	NaN	NaN	NaN	0	NaN	NaN	NaN	NaN	205870	NaN	NaN	164050	NaN	2	2	2	10.7	10.7	10.7	24.893	0.0097345	2.1861	1364800	2	1	0	1	1	0	0	136480	0	0
P63242;Q8BGY2	P63242;Q8BGY2	Eukaryotic translation initiation factor 5A-1;Eukaryotic translation initiation factor 5A-2	Eif5a;Eif5a2	NaN	NaN	NaN	0	NaN	NaN	NaN	121040	NaN	2871700	NaN	NaN	172980	3	3	3	29.2	29.2	29.2	16.832	0	8.1639	2288100	7	1	2	1	0	1	1	286010	0	0
P63276	P63276	40S ribosomal protein S17	Rps17	NaN	NaN	NaN	0	NaN	NaN	NaN	NaN	NaN	NaN	NaN	41920	NaN	1	1	1	18.5	18.5	18.5	15.524	0	5.8305	239740	1	0	0	1	0	0	0	39957	0	0
P68037	P68037	Ubiquitin-conjugating enzyme E2 L3	Ube2l3	NaN	NaN	NaN	0	NaN	NaN	NaN	150760	NaN	NaN	NaN	NaN	NaN	1	1	1	14.3	14.3	14.3	17.861	0	4.8314	505250	1	1	0	0	0	0	0	63156	0	0
P70202	P70202	Latexin	Lxn	NaN	NaN	NaN	0	NaN	NaN	NaN	NaN	400640	NaN	NaN	NaN	NaN	1	1	1	4.1	4.1	4.1	25.492	0	4.8077	1326100	2	1	0	0	1	0	0	165760	0	0
P70274	P70274	Selenoprotein P	Sepp1	NaN	NaN	NaN	0	NaN	NaN	NaN	NaN	NaN	NaN	2541200	NaN	345710	4	4	4	12.4	12.4	12.4	42.705	0	5.5605	15364000	6	0	2	1	1	1	1	698360	0	0
P80314	P80314	T-complex protein 1 subunit beta	Cct2	NaN	NaN	NaN	0	NaN	NaN	NaN	NaN	NaN	NaN	NaN	NaN	109940	1	1	1	2.2	2.2	2.2	57.477	0.0095902	2.0896	514940	2	0	0	1	0	0	1	14304	0	0
P81068	P81068	Iroquois-class homeodomain protein IRX-1	Irx1	NaN	NaN	NaN	0	NaN	NaN	NaN	NaN	268110	247640000	NaN	994510	NaN	1	1	1	4.2	4.2	4.2	50.168	0.0099188	2.2629	371800000	10	1	1	1	1	1	1	16165000	0	0
P97457	P97457	Myosin regulatory light chain 2, skeletal muscle isoform	Mylpf	NaN	NaN	NaN	0	NaN	NaN	NaN	NaN	NaN	99813000	NaN	NaN	NaN	5	5	5	30.2	30.2	30.2	18.955	0	13.571	55577000	8	0	5	0	0	1	0	4631400	0	0
P97807	P97807	Fumarate hydratase, mitochondrial	Fh	NaN	NaN	NaN	0	NaN	NaN	NaN	NaN	NaN	NaN	1583500	NaN	NaN	1	1	1	4.1	4.1	4.1	54.356	0	4.3739	3202400	2	0	1	0	0	1	0	100070	0	0
P97946	P97946	Vascular endothelial growth factor D	Figf	NaN	NaN	NaN	0	NaN	NaN	NaN	35502	NaN	NaN	NaN	NaN	NaN	1	1	1	5.3	5.3	5.3	40.908	0.0037879	2.6982	118980	1	1	0	0	0	0	0	4759.3	0	0
Q00731	Q00731	Vascular endothelial growth factor A	Vegfa	NaN	NaN	NaN	0	NaN	NaN	NaN	NaN	777040	NaN	4839300	NaN	NaN	2	2	2	8.4	8.4	8.4	25.283	0	3.3908	4451800	3	0	1	0	1	2	0	404710	0	0
Q03137	Q03137	Ephrin type-A receptor 4	Epha4	NaN	NaN	NaN	0	NaN	NaN	NaN	NaN	NaN	NaN	4202400	NaN	63421	2	2	2	4	4	4	109.81	0	27.711	10980000	3	0	1	1	0	1	1	192630	0	0
Q03265	Q03265	ATP synthase subunit alpha, mitochondrial	Atp5a1	NaN	NaN	NaN	0	NaN	NaN	NaN	NaN	NaN	756870	NaN	NaN	168320	2	2	2	3.8	3.8	3.8	59.752	0	3.5033	1020600	2	0	1	1	0	0	1	28349	0	0
Q05117	Q05117	Tartrate-resistant acid phosphatase type 5	Acp5	NaN	NaN	NaN	0	NaN	NaN	NaN	NaN	NaN	NaN	1040400	NaN	NaN	1	1	1	3.7	3.7	3.7	36.807	0.0096916	2.1694	877920	1	0	0	0	0	1	0	58528	0	0
Q06186	Q06186	Proheparin-binding EGF-like growth factor;Heparin-binding EGF-like growth factor	Hbegf	NaN	NaN	NaN	0	NaN	NaN	NaN	687220	NaN	3540700	NaN	NaN	NaN	1	1	1	7.7	7.7	7.7	22.807	0	24.23	3956700	9	1	1	0	1	1	0	359700	0	0
Q07813	Q07813	Apoptosis regulator BAX	Bax	NaN	NaN	NaN	0	NaN	NaN	NaN	NaN	278700	NaN	13079000	NaN	32301	3	3	3	14.1	14.1	14.1	21.394	0	23.141	10977000	8	1	2	0	2	3	1	1097700	0	0
Q08093	Q08093	Calponin-2	Cnn2	NaN	NaN	NaN	0	NaN	NaN	NaN	NaN	NaN	NaN	1320700	NaN	NaN	1	1	1	5.9	5.9	5.9	33.155	0	7.2572	663480	1	0	1	0	0	1	0	41468	0	0
Q14DK5	Q14DK5	HHIP-like protein 1	Hhipl1	NaN	NaN	NaN	0	NaN	NaN	NaN	NaN	NaN	7404800	NaN	NaN	NaN	2	2	2	3.9	3.9	3.9	87.527	0	10.662	2907000	3	0	2	0	0	2	0	66069	0	0
Q32MD9	Q32MD9	Cell adhesion molecule-related/down-regulated by oncogenes	Cdon	NaN	NaN	NaN	0	NaN	NaN	NaN	NaN	NaN	NaN	18341000	NaN	37791	3	3	3	3.7	3.7	3.7	135.42	0	7.6376	14273000	4	0	1	0	0	2	1	250390	0	0
Q3TMX7	Q3TMX7	Sulfhydryl oxidase 2	Qsox2	NaN	NaN	NaN	0	NaN	NaN	NaN	NaN	NaN	NaN	7602500	357210	NaN	2	2	2	4.3	4.3	4.3	77.774	0.0065116	2.5582	6023500	3	0	1	1	0	1	1	140080	0	0
Q3U4G3	Q3U4G3	Xyloside xylosyltransferase 1	Xxylt1	NaN	NaN	NaN	0	NaN	NaN	NaN	NaN	143900	NaN	3413800	NaN	NaN	1	1	1	2	2	2	43.838	0.0095238	2.0333	5389600	5	1	1	0	1	1	0	224570	0	0
Q3V1G4	Q3V1G4	Olfactomedin-like protein 2B	Olfml2b	NaN	NaN	NaN	0	NaN	NaN	NaN	NaN	NaN	3893900	NaN	NaN	NaN	3	3	3	4.6	4.6	4.6	83.502	0.0090498	2.286	2324000	3	0	3	0	0	0	0	86075	0	0
Q3V2C1	Q3V2C1	Keratin-associated protein 9-3	Krtap9-3	NaN	NaN	NaN	0	NaN	NaN	NaN	581790	NaN	NaN	NaN	NaN	NaN	1	1	1	7.4	7.4	7.4	13.902	0.0091241	2.3734	3471200	1	1	0	0	0	0	0	1735600	0	0
Q5NC83	Q5NC83	Uncharacterized protein C7orf72 homolog		NaN	NaN	NaN	0	NaN	NaN	NaN	NaN	107060	NaN	NaN	32484	NaN	3	3	3	8.8	8.8	8.8	50.4	0.0097604	2.1914	575540	1	0	0	1	2	0	0	19185	0	0
Q5SNZ0;Q9WVQ0	Q5SNZ0	Girdin	Ccdc88a	NaN	NaN	NaN	0	NaN	NaN	NaN	NaN	134640	NaN	NaN	NaN	NaN	3	3	3	2.6	2.6	2.6	215.92	0.0095403	2.0508	4311000	2	1	1	0	2	0	0	35925	0	0
Q5SWU9	Q5SWU9	Acetyl-CoA carboxylase 1;Biotin carboxylase	Acaca	NaN	NaN	NaN	0	NaN	NaN	NaN	NaN	NaN	NaN	NaN	NaN	1110500	1	1	1	1.2	1.2	1.2	265.25	0.0019066	2.8258	24925000	3	0	0	1	0	0	1	179320	0	0
Q5SX39	Q5SX39	Myosin-4	Myh4	NaN	NaN	NaN	0	NaN	NaN	NaN	NaN	NaN	96920000	NaN	NaN	NaN	67	6	6	31.1	3	3	222.86	0	28.105	55424000	10	0	6	0	0	1	0	436410	0	0
Q5YD48	Q5YD48	APOBEC1 complementation factor	A1cf	NaN	NaN	NaN	0	NaN	NaN	NaN	NaN	NaN	NaN	NaN	NaN	6640400	1	1	1	4.2	4.2	4.2	65.681	0.0064935	2.532	73330000	9	0	0	1	0	0	1	2222100	0	0
Q60692	Q60692	Proteasome subunit beta type-6	Psmb6	NaN	NaN	NaN	0	NaN	NaN	NaN	284760	NaN	NaN	5167500	NaN	NaN	3	3	3	24.4	24.4	24.4	25.378	0	6.0532	9299600	4	2	1	0	1	1	0	845410	0	0
Q61129	Q61129	Complement factor I;Complement factor I heavy chain;Complement factor I light chain	Cfi	NaN	NaN	NaN	0	NaN	NaN	NaN	NaN	NaN	NaN	NaN	168170	NaN	1	1	1	2.2	2.2	2.2	67.26	0	61.703	1228100	3	0	0	1	0	0	1	30704	0	0
Q61543	Q61543	Golgi apparatus protein 1	Glg1	NaN	NaN	NaN	0	NaN	NaN	NaN	NaN	202210	NaN	NaN	NaN	NaN	2	2	2	2.2	2.2	2.2	133.73	0	34.317	1240100	3	1	0	0	2	0	0	18237	0	0
Q61990	Q61990	Poly(rC)-binding protein 2	Pcbp2	NaN	NaN	NaN	0	NaN	NaN	NaN	NaN	406330	NaN	NaN	NaN	NaN	3	1	1	12.2	3.6	3.6	38.221	0.0083026	2.4515	2436100	4	1	0	0	1	0	0	121810	0	0
Q62177	Q62177	Semaphorin-3B	Sema3b	NaN	NaN	NaN	0	NaN	NaN	NaN	NaN	174440	921990	NaN	NaN	NaN	2	2	2	2.9	2.9	2.9	82.699	0.0065238	2.5798	4877500	2	0	1	0	1	1	0	101610	0	0
Q62226	Q62226	Sonic hedgehog protein;Sonic hedgehog protein N-product;Sonic hedgehog protein C-product	Shh	NaN	NaN	NaN	0	NaN	NaN	NaN	NaN	NaN	NaN	902490	NaN	NaN	1	1	1	4.3	4.3	4.3	47.773	0	13.315	904060	1	0	1	0	0	1	0	34772	0	0
Q62261	Q62261	Spectrin beta chain, non-erythrocytic 1	Sptbn1	NaN	NaN	NaN	0	NaN	NaN	NaN	4319400	NaN	7311700	NaN	NaN	NaN	3	3	3	1.9	1.9	1.9	274.22	0	16.705	15385000	4	1	3	0	1	2	0	94389	0	0
Q62288	Q62288	Testican-1	Spock1	NaN	NaN	NaN	0	NaN	NaN	NaN	NaN	613150	NaN	NaN	NaN	NaN	3	3	2	7.7	7.7	5.4	49.55	0	6.0615	5554200	6	1	0	0	2	0	0	213620	0	0
Q62443	Q62443	Neuronal pentraxin-1	Nptx1	NaN	NaN	NaN	0	NaN	NaN	NaN	NaN	1266700	1107000	NaN	NaN	43283	2	2	2	5.6	5.6	5.6	47.117	0	11.944	3440000	3	0	1	0	1	0	1	132310	0	0
Q62446	Q62446	Peptidyl-prolyl cis-trans isomerase FKBP3	Fkbp3	NaN	NaN	NaN	0	NaN	NaN	NaN	NaN	236230	NaN	NaN	204260	NaN	2	2	2	12.5	12.5	12.5	25.147	0	3.5607	2741600	3	1	0	1	1	0	1	182770	0	0
Q62465	Q62465	Synaptic vesicle membrane protein VAT-1 homolog	Vat1	NaN	NaN	NaN	0	NaN	NaN	NaN	154060	NaN	NaN	NaN	NaN	NaN	1	1	1	3.9	3.9	3.9	43.096	0.0082645	2.4259	692260	1	1	0	0	0	0	0	36435	0	0
Q64105	Q64105	Sepiapterin reductase	Spr	NaN	NaN	NaN	0	NaN	NaN	NaN	NaN	202770	7997800	NaN	NaN	NaN	3	3	3	17.2	17.2	17.2	27.883	0	10.205	2569900	4	1	3	0	1	1	0	160620	0	0
Q64518	Q64518	Sarcoplasmic/endoplasmic reticulum calcium ATPase 3	Atp2a3	NaN	NaN	NaN	0	NaN	NaN	NaN	NaN	NaN	2889300	NaN	NaN	NaN	3	2	2	3.7	2.2	2.2	113.64	0	36.667	1606400	2	0	2	0	0	0	0	29748	0	0
Q64523;Q6GSS7	Q64523;Q6GSS7	Histone H2A type 2-C;Histone H2A type 2-A	Hist2h2ac;Hist2h2aa1	NaN	NaN	NaN	0	NaN	NaN	NaN	40933	NaN	NaN	NaN	NaN	NaN	3	3	1	30.2	30.2	8.5	13.988	0	27.383	244220	1	1	0	0	0	0	0	40703	0	0
Q64685	Q64685	Beta-galactoside alpha-2,6-sialyltransferase 1	St6gal1	NaN	NaN	NaN	0	NaN	NaN	NaN	NaN	167700	NaN	NaN	NaN	NaN	1	1	1	4	4	4	46.585	0	12.307	1411300	1	1	0	0	1	0	0	56452	0	0
Q64739	Q64739	Collagen alpha-2(XI) chain	Col11a2	NaN	NaN	NaN	0	NaN	NaN	NaN	NaN	NaN	NaN	3843000	NaN	NaN	2	1	1	2	1.3	1.3	171.53	0	5.4318	4881100	1	0	1	0	0	1	0	49304	0	0
Q67BJ4	Q67BJ4	Lactosylceramide 4-alpha-galactosyltransferase	A4galt	NaN	NaN	NaN	0	NaN	NaN	NaN	NaN	NaN	NaN	856150	NaN	NaN	1	1	1	2.5	2.5	2.5	41.366	0.0056232	2.607	1808300	2	0	1	0	0	1	0	78620	0	0
Q69ZB0	Q69ZB0	Leucine-rich repeat and coiled-coil domain-containing protein 1	Lrrcc1	NaN	NaN	NaN	0	NaN	NaN	NaN	1621100	NaN	NaN	NaN	NaN	6704500	2	2	2	1.8	1.8	1.8	119.17	0.0097691	2.1915	84229000	5	1	0	1	0	0	1	1257100	0	0
Q69ZK9	Q69ZK9	Neuroligin-2	Nlgn2	NaN	NaN	NaN	0	NaN	NaN	NaN	NaN	NaN	NaN	960630	NaN	146690	6	2	2	11.2	5	5	90.988	0.0091491	2.3909	1206000	2	0	0	1	0	1	1	38904	0	0
Q6F3F9	Q6F3F9	G-protein coupled receptor 126	Gpr126	NaN	NaN	NaN	0	NaN	NaN	NaN	1445100	NaN	10556000	NaN	NaN	NaN	2	2	2	1.6	1.6	1.6	129.72	0	10.411	7920500	5	2	1	0	2	1	0	172190	0	0
Q6NS45	Q6NS45	Coiled-coil domain-containing protein 66	Ccdc66	NaN	NaN	NaN	0	NaN	NaN	NaN	NaN	12149000	NaN	795590	NaN	2539000	2	2	2	1.3	1.3	1.3	107.37	0.0096407	2.1145	98675000	10	2	0	1	1	1	1	1495100	0	0
Q6PEB6	Q6PEB6	MOB-like protein phocein	Mob4	NaN	NaN	NaN	0	NaN	NaN	NaN	NaN	NaN	NaN	6089300	NaN	NaN	2	2	2	14.2	14.2	14.2	26.032	0.0090827	2.3224	1459300	2	0	1	0	0	2	0	104230	0	0
Q6URW6	Q6URW6	Myosin-14	Myh14	NaN	NaN	NaN	0	NaN	NaN	NaN	NaN	NaN	NaN	11076000	NaN	NaN	3	2	2	1.6	0.8	0.8	228.58	0	3.5058	5313600	4	0	1	0	0	2	0	41512	0	0
Q6ZWQ0	Q6ZWQ0	Nesprin-2	Syne2	NaN	NaN	NaN	0	NaN	NaN	NaN	NaN	1063300	NaN	4350800	214660	NaN	6	6	6	1.1	1.1	1.1	782.72	0	5.905	15196000	7	1	2	1	2	1	0	33324	0	0
Q769J6	Q769J6	A disintegrin and metalloproteinase with thrombospondin motifs 13	Adamts13	NaN	NaN	NaN	0	NaN	NaN	NaN	NaN	1060900	NaN	5935600	NaN	NaN	1	1	1	0.7	0.7	0.7	155.36	0.0097778	2.1923	15337000	7	1	1	0	1	1	0	196620	0	0
Q78PY7	Q78PY7	Staphylococcal nuclease domain-containing protein 1	Snd1	NaN	NaN	NaN	0	NaN	NaN	NaN	NaN	NaN	NaN	3773700	NaN	NaN	1	1	1	2.3	2.3	2.3	102.09	0	4.1156	2005900	1	0	1	0	0	1	0	32353	0	0
Q7TQ48	Q7TQ48	Sarcalumenin	Srl	NaN	NaN	NaN	0	NaN	NaN	NaN	NaN	NaN	3412200	NaN	NaN	NaN	1	1	1	1.4	1.4	1.4	99.183	0	7.2688	1897100	1	0	1	0	0	0	0	45169	0	0
Q7TQN3	Q7TQN3	WAP, Kazal, immunoglobulin, Kunitz and NTR domain-containing protein 2	Wfikkn2	NaN	NaN	NaN	0	NaN	NaN	NaN	NaN	NaN	NaN	4852000	NaN	NaN	1	1	1	2.1	2.1	2.1	63.333	0	8.8285	7201600	4	0	1	0	0	1	0	248330	0	0
Q80T91	Q80T91	Multiple epidermal growth factor-like domains protein 11	Megf11	NaN	NaN	NaN	0	NaN	NaN	NaN	NaN	9634.1	NaN	NaN	NaN	NaN	1	1	1	1.1	1.1	1.1	116.06	0.0019212	2.9085	235930	1	1	0	0	1	0	0	8738.2	0	0
Q80TA9	Q80TA9	Ectopic P granules protein 5 homolog	Epg5	NaN	NaN	NaN	0	NaN	NaN	NaN	NaN	8337.3	NaN	17326000	NaN	NaN	2	2	2	1.6	1.6	1.6	290.8	0	3.3402	12987000	2	1	0	0	1	1	0	98390	0	0
Q811F1	Q811F1	Zinc finger and BTB domain-containing protein 41	Zbtb41	NaN	NaN	NaN	0	NaN	NaN	NaN	NaN	NaN	NaN	NaN	NaN	33118	1	1	1	2.9	2.9	2.9	104.68	0.0019268	2.9828	1249100	1	0	0	0	0	0	1	21536	0	0
Q811L6	Q811L6	Microtubule-associated serine/threonine-protein kinase 4	Mast4	NaN	NaN	NaN	0	NaN	NaN	NaN	NaN	69543	7986100	NaN	NaN	303290	3	3	3	1.7	1.7	1.7	284	0.00096525	3.0127	5212700	4	1	2	1	1	0	1	33849	0	0
Q99LG2;Q8BFY9	Q99LG2;Q8BFY9	Transportin-2;Transportin-1	Tnpo2;Tnpo1	NaN	NaN	NaN	0	NaN	NaN	NaN	NaN	NaN	NaN	3112500	NaN	NaN	1	1	1	1.4	1.4	1.4	100.46	0.005597	2.5899	1579200	1	0	1	0	0	1	0	36724	0	0
Q8BFZ3	Q8BFZ3	Beta-actin-like protein 2	Actbl2	NaN	NaN	NaN	0	NaN	NaN	NaN	230820000	NaN	NaN	482270000	59996000	NaN	12	1	1	30.1	4.8	4.8	42.004	0.0098127	2.2083	1913400000	25	1	1	1	1	1	1	79725000	0	0
Q8BGY3	Q8BGY3	Leucine zipper protein 2	Luzp2	NaN	NaN	NaN	0	NaN	NaN	NaN	NaN	581260	NaN	NaN	NaN	NaN	1	1	1	2.9	2.9	2.9	39.02	0	6.4395	6292700	2	1	0	0	1	0	0	314640	0	0
Q8BH58	Q8BH58	TIP41-like protein	Tiprl	NaN	NaN	NaN	0	NaN	NaN	NaN	NaN	NaN	NaN	2302900	NaN	NaN	1	1	1	6.6	6.6	6.6	31.253	0.0028463	2.7452	2043200	2	0	1	0	0	1	0	113510	0	0
Q8BHE5	Q8BHE5	Bone morphogenetic protein 3	Bmp3	NaN	NaN	NaN	0	NaN	NaN	NaN	NaN	54063	NaN	4496000	NaN	36198	4	4	4	7.9	7.9	7.9	52.774	0	4.7984	7664400	4	1	2	0	1	1	1	247240	0	0
Q8BIS8	Q8BIS8	Coiled-coil domain-containing protein 126	Ccdc126	NaN	NaN	NaN	0	NaN	NaN	NaN	NaN	2462500	NaN	21739000	84880	NaN	2	1	1	15	8.6	8.6	15.59	0	150.53	20640000	13	1	1	1	1	1	0	2948500	0	0
Q8BJU2	Q8BJU2	Tetraspanin-9	Tspan9	NaN	NaN	NaN	0	NaN	NaN	NaN	NaN	434240	NaN	NaN	NaN	NaN	1	1	1	6.3	6.3	6.3	26.738	0	40.891	1506700	2	1	0	0	1	0	0	136970	0	0
Q8BLU0	Q8BLU0		Flrt2	NaN	NaN	NaN	0	NaN	NaN	NaN	NaN	159980	NaN	1493700	NaN	NaN	2	2	2	4.4	4.4	4.4	73.947	0	3.676	3195200	4	1	1	0	1	1	0	91291	0	0
Q8BNJ2	Q8BNJ2	A disintegrin and metalloproteinase with thrombospondin motifs 4	Adamts4	NaN	NaN	NaN	0	NaN	NaN	NaN	NaN	NaN	5874700	NaN	NaN	NaN	2	2	2	4.4	4.4	4.4	90.069	0	16.46	2322300	2	0	2	0	0	1	0	52780	0	0
Q921Y0;Q8BPB0	Q921Y0;Q8BPB0	MOB kinase activator 1A;MOB kinase activator 1B	Mob1a;Mob1b	NaN	NaN	NaN	0	NaN	NaN	NaN	NaN	288640	29207000	NaN	NaN	NaN	3	3	3	17.1	17.1	17.1	25.079	0	31.305	10009000	6	1	3	0	1	1	0	1000900	0	0
Q8BSU2	Q8BSU2	C-X-C motif chemokine 16	Cxcl16	NaN	NaN	NaN	0	NaN	NaN	NaN	NaN	226840	4044200	NaN	NaN	96528	2	2	2	7.3	7.3	7.3	26.896	0.0095986	2.0901	6530600	3	0	1	1	1	0	1	653060	0	0
Q8BVG4	Q8BVG4	Dipeptidyl peptidase 9	Dpp9	NaN	NaN	NaN	0	NaN	NaN	NaN	NaN	NaN	NaN	601830	NaN	NaN	1	1	1	2.4	2.4	2.4	98	0.0095321	2.0451	412060	1	0	1	0	0	1	0	8584.6	0	0
Q8BVI4	Q8BVI4	Dihydropteridine reductase	Qdpr	NaN	NaN	NaN	0	NaN	NaN	NaN	NaN	125940	NaN	NaN	62269	NaN	1	1	1	6.6	6.6	6.6	25.57	0.0094991	2.0184	1246400	1	1	0	1	1	0	0	73315	0	0
Q8BVW0	Q8BVW0	Neutral alpha-glucosidase C	Ganc	NaN	NaN	NaN	0	NaN	NaN	NaN	NaN	439730	7412900	NaN	NaN	NaN	1	1	1	2.4	2.4	2.4	102.01	0.0098655	2.2329	5720100	4	1	1	0	1	0	0	124350	0	0
Q8BZB2	Q8BZB2	Phosphopantothenoylcysteine decarboxylase	Ppcdc	NaN	NaN	NaN	0	NaN	NaN	NaN	NaN	NaN	NaN	1384800	NaN	NaN	1	1	1	6.9	6.9	6.9	22.344	0	3.5326	567000	1	0	1	0	0	1	0	43615	0	0
Q8C0F9	Q8C0F9	Inactive serine protease 35	Prss35	NaN	NaN	NaN	0	NaN	NaN	NaN	NaN	NaN	56700000	NaN	NaN	NaN	1	1	1	6.1	6.1	6.1	45.786	0	10.153	18584000	3	0	1	0	0	1	0	1032500	0	0
Q8C1Q4	Q8C1Q4	Meteorin	Metrn	NaN	NaN	NaN	0	NaN	NaN	NaN	NaN	NaN	NaN	NaN	NaN	83239	2	2	2	7.6	7.6	7.6	31.469	0.0095819	2.0896	611450	2	0	0	1	0	0	2	43675	0	0
Q8C341	Q8C341	SUN domain-containing ossification factor	Suco	NaN	NaN	NaN	0	NaN	NaN	NaN	NaN	NaN	NaN	4290300	NaN	NaN	1	1	1	1	1	1	139.17	0.0097173	2.1782	1535100	1	0	0	0	0	1	0	23616	0	0
Q8C6K9;A6H584	Q8C6K9	Collagen alpha-6(VI) chain	Col6a6	NaN	NaN	NaN	0	NaN	NaN	NaN	NaN	NaN	NaN	1012400000	NaN	51976	3	3	3	2.2	2.2	2.2	246.32	0.0056338	2.6494	622570000	3	0	1	0	0	1	2	4826100	0	0
Q8C9W3	Q8C9W3	A disintegrin and metalloproteinase with thrombospondin motifs 2	Adamts2	NaN	NaN	NaN	0	NaN	NaN	NaN	NaN	NaN	NaN	1887100	NaN	NaN	1	1	1	1.6	1.6	1.6	135.3	0	5.6814	1235300	2	0	1	0	0	1	0	16470	0	0
Q8CA71	Q8CA71	Protein shisa-4	Shisa4	NaN	NaN	NaN	0	NaN	NaN	NaN	NaN	518270	NaN	2096000	NaN	NaN	1	1	1	4.6	4.6	4.6	21.483	0.0097087	2.1726	3257800	6	1	1	0	1	1	0	542970	0	0
Q8CAE9	Q8CAE9	Podocalyxin-like protein 2	Podxl2	NaN	NaN	NaN	0	NaN	NaN	NaN	NaN	188670	NaN	NaN	NaN	85515	1	1	1	1.8	1.8	1.8	64.972	0.009901	2.2502	843210	3	1	0	1	1	0	1	64863	0	0
Q8CF98	Q8CF98	Collectin-10	Colec10	NaN	NaN	NaN	0	NaN	NaN	NaN	NaN	NaN	2324400	NaN	NaN	NaN	2	2	2	7.6	7.6	7.6	30.523	0.0082721	2.4286	2816500	2	0	1	0	1	1	0	156470	0	0
Q8CGM1	Q8CGM1	Brain-specific angiogenesis inhibitor 2	Bai2	NaN	NaN	NaN	0	NaN	NaN	NaN	NaN	NaN	NaN	574580	NaN	73634	2	2	2	1.6	1.6	1.6	169.86	0.0056075	2.5959	2903200	3	0	0	1	0	1	1	38709	0	0
Q8CGP1;Q64524	Q8CGP1;Q64524	Histone H2B type 1-K;Histone H2B type 2-E	Hist1h2bk;Hist2h2be	NaN	NaN	NaN	0	NaN	NaN	NaN	NaN	NaN	NaN	NaN	467670	NaN	11	2	1	59.5	31	13.5	13.92	0	5.9617	2674600	1	0	0	1	0	0	0	243150	0	0
Q8CHP8	Q8CHP8	Phosphoglycolate phosphatase	Pgp	NaN	NaN	NaN	0	NaN	NaN	NaN	NaN	298580	676580	NaN	NaN	NaN	2	2	2	10.6	10.6	10.6	34.54	0.009607	2.0931	1257200	2	0	1	0	1	0	0	66166	0	0
Q8CIE0	Q8CIE0	Serpin A11	Serpina11	NaN	NaN	NaN	0	NaN	NaN	NaN	NaN	63344	NaN	NaN	NaN	NaN	1	1	1	3.5	3.5	3.5	47.188	0.0090744	2.3016	4220800	3	1	0	0	1	0	0	281380	0	0
Q8K135	Q8K135	Dyslexia-associated protein KIAA0319-like protein	Kiaa0319l	NaN	NaN	NaN	0	NaN	NaN	NaN	362430	NaN	NaN	NaN	NaN	188290	2	2	2	3.4	3.4	3.4	115.31	0	3.8009	1975200	5	1	0	1	1	0	1	45936	0	0
Q8K157	Q8K157	Aldose 1-epimerase	Galm	NaN	NaN	NaN	0	NaN	NaN	NaN	NaN	430310	NaN	NaN	NaN	NaN	1	1	1	4.1	4.1	4.1	37.798	0	5.6661	3956300	2	1	0	0	1	0	0	232730	0	0
Q8K1A0	Q8K1A0	Methyltransferase-like protein 5	Mettl5	NaN	NaN	NaN	0	NaN	NaN	NaN	NaN	NaN	NaN	730970	NaN	NaN	1	1	1	3.3	3.3	3.3	23.662	0	3.5917	1984200	0	0	1	0	0	1	0	180380	0	0
Q8K1B9	Q8K1B9	Polypeptide N-acetylgalactosaminyltransferase 18	Galnt18	NaN	NaN	NaN	0	NaN	NaN	NaN	NaN	96915	4214300	NaN	NaN	NaN	2	2	2	4.7	4.7	4.7	71.095	0.0097002	2.17	8616100	2	1	1	0	1	1	0	277940	0	0
Q8K1E3	Q8K1E3	Protein delta homolog 2	Dlk2	NaN	NaN	NaN	0	NaN	NaN	NaN	NaN	499900	NaN	4277900	NaN	NaN	1	1	1	3.1	3.1	3.1	40.404	0.0098039	2.2072	12860000	4	1	1	0	1	1	0	918540	0	0
Q8K2C7	Q8K2C7	Protein OS-9	Os9	NaN	NaN	NaN	0	NaN	NaN	NaN	NaN	NaN	NaN	4231800	NaN	NaN	1	1	1	1.8	1.8	1.8	76.107	0	3.2754	2010000	2	0	1	0	0	1	0	49025	0	0
Q8K2Q0	Q8K2Q0	COMM domain-containing protein 9	Commd9	NaN	NaN	NaN	0	NaN	NaN	NaN	NaN	NaN	NaN	819280	NaN	NaN	1	1	1	8.1	8.1	8.1	21.85	0	7.9479	468910	2	0	1	0	0	1	0	36070	0	0
Q8K2T1	Q8K2T1	NmrA-like family domain-containing protein 1	Nmral1	NaN	NaN	NaN	0	NaN	NaN	NaN	NaN	NaN	NaN	1210500	NaN	NaN	1	1	1	5.5	5.5	5.5	34.376	0	22.468	994230	2	0	1	0	0	1	0	52328	0	0
Q8K354	Q8K354	Carbonyl reductase [NADPH] 3	Cbr3	NaN	NaN	NaN	0	NaN	NaN	NaN	NaN	268730	NaN	7377700	NaN	NaN	2	2	2	9	9	9	30.953	0	7.9504	5583000	3	1	1	0	1	1	0	279150	0	0
Q8R1G2	Q8R1G2	Carboxymethylenebutenolidase homolog	Cmbl	NaN	NaN	NaN	0	NaN	NaN	NaN	NaN	545570	6024200	NaN	NaN	NaN	2	2	2	11.8	11.8	11.8	27.902	0	8.6277	5078500	3	1	2	0	1	1	0	317410	0	0
Q8R2Z5	Q8R2Z5	von Willebrand factor A domain-containing protein 1	Vwa1	NaN	NaN	NaN	0	NaN	NaN	NaN	NaN	76230	NaN	NaN	NaN	NaN	1	1	1	3.9	3.9	3.9	44.708	0.0064815	2.5197	1102500	1	1	0	0	1	0	0	58027	0	0
Q8R429;O55143	Q8R429;O55143	Sarcoplasmic/endoplasmic reticulum calcium ATPase 1;Sarcoplasmic/endoplasmic reticulum calcium ATPase 2	Atp2a1;Atp2a2	NaN	NaN	NaN	0	NaN	NaN	NaN	NaN	NaN	39808000	NaN	NaN	NaN	10	10	9	13.4	13.4	11.9	109.42	0	95.257	22132000	10	0	9	0	0	0	0	433960	0	0
Q8VCG4	Q8VCG4	Complement component C8 gamma chain	C8g	NaN	NaN	NaN	0	NaN	NaN	NaN	NaN	NaN	1256400	NaN	NaN	74246	2	2	2	12.4	12.4	12.4	22.508	0.0096576	2.1176	788470	2	0	1	1	0	0	1	65706	0	0
Q8VHP6	Q8VHP6	Cadherin-related family member 1	Cdhr1	NaN	NaN	NaN	0	NaN	NaN	NaN	NaN	NaN	15874000	NaN	NaN	NaN	2	2	2	3.6	3.6	3.6	94.026	0	11.747	4302600	3	0	2	0	0	1	0	107560	0	0
Q9D154;Q8VHP7;Q9JK88	Q9D154;Q8VHP7;Q9JK88	Leukocyte elastase inhibitor A;Leukocyte elastase inhibitor B;Serpin I2	Serpinb1a;Serpinb1b;Serpini2	NaN	NaN	NaN	0	NaN	NaN	NaN	NaN	352400	NaN	2955600	NaN	63211	1	1	1	2.6	2.6	2.6	42.574	0.0082418	2.4026	9451600	4	1	1	0	1	1	1	410940	0	0
Q91V64	Q91V64	Isochorismatase domain-containing protein 1	Isoc1	NaN	NaN	NaN	0	NaN	NaN	NaN	NaN	865860	NaN	8335800	NaN	NaN	2	2	2	9.1	9.1	9.1	32.032	0	12.729	10242000	8	2	1	0	2	1	0	640110	0	0
Q91VI7	Q91VI7	Ribonuclease inhibitor	Rnh1	NaN	NaN	NaN	0	NaN	NaN	NaN	NaN	304790	NaN	NaN	NaN	NaN	1	1	1	2.2	2.2	2.2	49.816	0.0091075	2.3589	2920700	2	1	0	0	1	0	0	108180	0	0
Q91X52	Q91X52	L-xylulose reductase	Dcxr	NaN	NaN	NaN	0	NaN	NaN	NaN	NaN	729560	NaN	39700000	NaN	278000	1	1	1	6.6	6.6	6.6	25.746	0	64.79	28418000	12	1	1	1	1	1	1	1894500	0	0
Q91X83	Q91X83	S-adenosylmethionine synthase isoform type-1	Mat1a	NaN	NaN	NaN	0	NaN	NaN	NaN	NaN	210590	NaN	491400	NaN	36050	1	1	1	3.8	3.8	3.8	43.508	0	7.3215	6369200	5	1	1	1	1	1	1	335220	0	0
Q91X91	Q91X91	Nicotinate-nucleotide pyrophosphorylase [carboxylating]	Qprt	NaN	NaN	NaN	0	NaN	NaN	NaN	NaN	1595400	NaN	11206000	NaN	NaN	2	2	2	10	10	10	31.53	0.0098566	2.232	24492000	3	0	1	0	1	2	0	1530700	0	0
Q91XA2	Q91XA2	Golgi membrane protein 1	Golm1	NaN	NaN	NaN	0	NaN	NaN	NaN	NaN	NaN	NaN	NaN	NaN	1187600	2	2	2	6.4	6.4	6.4	44.326	0	4.5622	6728300	6	0	0	1	0	0	2	240300	0	0
Q91Y47	Q91Y47	Coagulation factor XI;Coagulation factor XIa heavy chain;Coagulation factor XIa light chain	F11	NaN	NaN	NaN	0	NaN	NaN	NaN	NaN	239380	10430000	NaN	NaN	NaN	2	2	2	3.5	3.5	3.5	69.788	0	4.3517	13038000	4	1	2	0	1	0	0	352370	0	0
Q91Y74	Q91Y74	CMP-N-acetylneuraminate-beta-galactosamide-alpha-2,3-sialyltransferase 4	St3gal4	NaN	NaN	NaN	0	NaN	NaN	NaN	NaN	NaN	NaN	524270	NaN	NaN	1	1	1	6.9	6.9	6.9	38.058	0.0094909	2.0172	1752300	1	0	1	0	0	1	0	83442	0	0
Q91YE6	Q91YE6	Importin-9	Ipo9	NaN	NaN	NaN	0	NaN	NaN	NaN	NaN	NaN	NaN	922400	NaN	NaN	1	1	1	2.7	2.7	2.7	116.05	0	7.0938	585860	3	0	1	0	0	1	0	13949	0	0
Q91YY2	Q91YY2	Beta-1,4-galactosyltransferase 3;N-acetyllactosamine synthase;Beta-N-acetylglucosaminylglycopeptide beta-1,4-galactosyltransferase;Beta-N-acetylglucosaminyl-glycolipid beta-1,4-galactosyltransferase	B4galt3	NaN	NaN	NaN	0	NaN	NaN	NaN	NaN	NaN	NaN	2383400	NaN	55583	2	2	2	7.8	7.8	7.8	44.084	0	7.4786	3173000	3	0	1	1	0	1	1	144230	0	0
Q91Z53	Q91Z53	Glyoxylate reductase/hydroxypyruvate reductase	Grhpr	NaN	NaN	NaN	0	NaN	NaN	NaN	NaN	95024	NaN	3255200	NaN	NaN	2	2	2	5.2	5.2	5.2	35.328	0.0095073	2.0196	4546500	2	1	1	0	1	1	0	303100	0	0
Q920A5	Q920A5	Retinoid-inducible serine carboxypeptidase	Scpep1	NaN	NaN	NaN	0	NaN	NaN	NaN	NaN	NaN	NaN	1576800	NaN	NaN	2	2	2	4.6	4.6	4.6	50.964	0	4.1556	4341300	2	0	1	0	0	2	0	206730	0	0
Q924X6	Q924X6	Low-density lipoprotein receptor-related protein 8	Lrp8	NaN	NaN	NaN	0	NaN	NaN	NaN	NaN	NaN	NaN	NaN	NaN	68543	1	1	1	1.1	1.1	1.1	109.82	0.0056127	2.6054	2550200	4	0	0	1	0	0	1	43224	0	0
Q93092	Q93092	Transaldolase	Taldo1	NaN	NaN	NaN	0	NaN	NaN	NaN	NaN	81445	NaN	NaN	NaN	NaN	1	1	1	3.3	3.3	3.3	37.387	0.0097259	2.1796	1076900	2	1	0	0	1	0	0	44871	0	0
Q99JH7	Q99JH7	Calsyntenin-3	Clstn3	NaN	NaN	NaN	0	NaN	NaN	NaN	NaN	152910	NaN	7358900	NaN	NaN	3	3	3	3.9	3.9	3.9	105.87	0	7.2864	5200300	4	1	1	0	3	1	0	126840	0	0
Q99JI4	Q99JI4	26S proteasome non-ATPase regulatory subunit 6	Psmd6	NaN	NaN	NaN	0	NaN	NaN	NaN	204070	NaN	NaN	NaN	NaN	NaN	1	1	1	4.4	4.4	4.4	45.536	0.002849	2.763	916950	1	1	0	0	0	0	0	31619	0	0
Q99JI6	Q99JI6	Ras-related protein Rap-1b	Rap1b	NaN	NaN	NaN	0	NaN	NaN	NaN	NaN	670370	NaN	1961300	NaN	362970	9	9	3	73.4	73.4	29.3	20.825	0	191.02	5768100	11	1	1	1	3	2	1	480680	0	0
Q99JW4	Q99JW4	LIM and senescent cell antigen-like-containing domain protein 1	Lims1	NaN	NaN	NaN	0	NaN	NaN	NaN	NaN	1097000	NaN	6735400	NaN	NaN	1	1	1	3.7	3.7	3.7	37.24	0	3.3707	10450000	7	1	1	0	1	1	0	550010	0	0
Q99JY9	Q99JY9	Actin-related protein 3	Actr3	NaN	NaN	NaN	0	NaN	NaN	NaN	NaN	NaN	NaN	NaN	NaN	166990	1	1	1	4.1	4.1	4.1	47.357	0	42.149	2797300	2	0	0	1	0	0	1	127150	0	0
Q99KC8	Q99KC8	von Willebrand factor A domain-containing protein 5A	Vwa5a	NaN	NaN	NaN	0	NaN	NaN	NaN	NaN	NaN	NaN	3701200	NaN	NaN	2	2	2	3.3	3.3	3.3	87.142	0	13.311	2423000	3	0	1	0	1	1	0	49449	0	0
Q99L47	Q99L47	Hsc70-interacting protein	St13	NaN	NaN	NaN	0	NaN	NaN	NaN	1021200	NaN	NaN	NaN	NaN	NaN	1	1	1	2.7	2.7	2.7	41.655	0	3.2326	2414800	4	1	0	0	1	0	0	160980	0	0
Q99LB6	Q99LB6	Methionine adenosyltransferase 2 subunit beta	Mat2b	NaN	NaN	NaN	0	NaN	NaN	NaN	NaN	161800	NaN	2706800	NaN	31528	1	1	1	3.6	3.6	3.6	37.392	0	12.637	5849800	6	1	1	1	1	1	1	324990	0	0
Q99M74	Q99M74	Keratin, type II cuticular Hb2	Krt82	NaN	NaN	NaN	0	NaN	NaN	NaN	NaN	547890	NaN	NaN	NaN	NaN	5	3	1	7.6	5.6	2.3	57.14	0	7.183	4254900	2	0	0	0	1	0	0	125140	0	0
Q99MV7	Q99MV7	RING finger protein 17	Rnf17	NaN	NaN	NaN	0	NaN	NaN	NaN	NaN	380710	NaN	NaN	NaN	19331000	3	3	3	4.6	4.6	4.6	185.6	0.0098478	2.2299	135570000	3	1	0	1	1	0	2	1673600	0	0
Q9CPT3	Q9CPT3	N-acylneuraminate-9-phosphatase	Nanp	NaN	NaN	NaN	0	NaN	NaN	NaN	NaN	NaN	NaN	2723400	NaN	NaN	1	1	1	7.3	7.3	7.3	27.808	0	123.26	1595200	1	0	1	0	0	1	0	122710	0	0
Q9CPY7	Q9CPY7	Cytosol aminopeptidase	Lap3	NaN	NaN	NaN	0	NaN	NaN	NaN	NaN	215600	NaN	NaN	NaN	NaN	1	1	1	2.3	2.3	2.3	56.141	0	3.34	8708600	1	1	0	0	1	0	0	290290	0	0
Q9CQ89	Q9CQ89	Protein CutA	Cuta	NaN	NaN	NaN	0	NaN	NaN	NaN	NaN	NaN	3317500	NaN	NaN	NaN	2	2	2	15.8	15.8	15.8	18.865	0.0064875	2.5263	1549200	3	0	2	0	0	1	0	309840	0	0
Q9CX56	Q9CX56	26S proteasome non-ATPase regulatory subunit 8	Psmd8	NaN	NaN	NaN	0	NaN	NaN	NaN	NaN	241110	NaN	1763900	NaN	NaN	1	1	1	4.2	4.2	4.2	39.93	0	30.182	1365500	3	1	1	0	1	1	0	62066	0	0
Q9CXW4	Q9CXW4	60S ribosomal protein L11	Rpl11	NaN	NaN	NaN	0	NaN	NaN	NaN	NaN	NaN	NaN	817070	NaN	NaN	1	1	1	7.9	7.9	7.9	20.252	0	9.9437	374290	1	0	1	0	0	1	0	37429	0	0
Q9CYN9	Q9CYN9	Renin receptor	Atp6ap2	NaN	NaN	NaN	0	NaN	NaN	NaN	170200	NaN	1639100	NaN	NaN	NaN	2	2	2	6	6	6	39.091	0	4.772	1167600	3	1	2	0	1	1	0	68680	0	0
Q9CZ30	Q9CZ30	Obg-like ATPase 1	Ola1	NaN	NaN	NaN	0	NaN	NaN	NaN	NaN	207790	NaN	883730	NaN	NaN	1	1	1	3.8	3.8	3.8	44.729	0	3.8618	4022700	3	1	1	0	1	1	0	143670	0	0
Q9CZY3	Q9CZY3	Ubiquitin-conjugating enzyme E2 variant 1	Ube2v1	NaN	NaN	NaN	0	NaN	NaN	NaN	NaN	NaN	NaN	NaN	NaN	1035800	1	1	1	8.2	8.2	8.2	16.355	0	7.728	4923700	2	0	0	1	0	0	1	410310	0	0
Q9D0A3	Q9D0A3	Arpin	Arpin	NaN	NaN	NaN	0	NaN	NaN	NaN	NaN	349210	NaN	2481500	NaN	NaN	1	1	1	5.3	5.3	5.3	25.193	0	3.4312	1856300	2	0	1	0	1	1	0	132590	0	0
Q9D0E5	Q9D0E5	EF-hand calcium-binding domain-containing protein 11	Efcab11	NaN	NaN	NaN	0	NaN	NaN	NaN	NaN	577640	NaN	10028000	355860	NaN	1	1	1	4.9	4.9	4.9	18.47	0.0097518	2.1879	36178000	4	0	1	1	1	1	1	3617800	0	0
Q9D0F9	Q9D0F9	Phosphoglucomutase-1	Pgm1	NaN	NaN	NaN	0	NaN	NaN	NaN	NaN	NaN	9663500	NaN	NaN	NaN	3	3	3	9.1	9.1	9.1	61.417	0	7.376	5272600	3	0	3	0	0	1	0	138750	0	0
Q9D0M3	Q9D0M3	Cytochrome c1, heme protein, mitochondrial	Cyc1	NaN	NaN	NaN	0	NaN	NaN	NaN	NaN	445030	NaN	3606900	NaN	NaN	1	1	1	5.8	5.8	5.8	35.327	0.0095735	2.0828	9983500	3	1	1	0	1	1	0	623970	0	0
Q9D1C8	Q9D1C8	Vacuolar protein sorting-associated protein 28 homolog	Vps28	NaN	NaN	NaN	0	NaN	NaN	NaN	NaN	NaN	NaN	675530	NaN	NaN	1	1	1	6.8	6.8	6.8	25.452	0.0096154	2.0995	235560	1	0	1	0	0	1	0	16825	0	0
Q9D1H9	Q9D1H9	Microfibril-associated glycoprotein 4	Mfap4	NaN	NaN	NaN	0	NaN	NaN	NaN	NaN	166690	NaN	1433600	NaN	197450	2	2	2	17.1	17.1	17.1	28.937	0	13.15	8656700	5	1	1	1	1	1	2	786970	0	0
Q9D1J1	Q9D1J1	Adaptin ear-binding coat-associated protein 2	Necap2	NaN	NaN	NaN	0	NaN	NaN	NaN	NaN	54391	NaN	NaN	NaN	NaN	1	1	1	10.2	10.2	10.2	28.598	0	8.2532	458560	2	1	0	0	1	0	0	28660	0	0
Q9D2Q8	Q9D2Q8	Protein S100-A14	S100a14	NaN	NaN	NaN	0	NaN	NaN	NaN	NaN	NaN	NaN	2733300	NaN	NaN	1	1	1	14.4	14.4	14.4	11.599	0	111.35	2802700	3	0	1	0	0	1	0	400390	0	0
Q9D7X3	Q9D7X3	Dual specificity protein phosphatase 3	Dusp3	NaN	NaN	NaN	0	NaN	NaN	NaN	NaN	67689	324390	NaN	NaN	NaN	2	2	2	16.2	16.2	16.2	20.472	0.0028571	2.7954	363140	2	0	1	0	1	0	0	40349	0	0
Q9D8S4	Q9D8S4	Oligoribonuclease, mitochondrial	Rexo2	NaN	NaN	NaN	0	NaN	NaN	NaN	NaN	217180	6824300	NaN	NaN	NaN	4	4	4	25.3	25.3	25.3	26.738	0	6.111	3266000	5	1	3	0	2	1	0	233290	0	0
Q9DB05	Q9DB05	Alpha-soluble NSF attachment protein	Napa	NaN	NaN	NaN	0	NaN	NaN	NaN	NaN	NaN	NaN	769440	NaN	NaN	1	1	1	5.1	5.1	5.1	33.189	0	7.2731	1202800	1	0	1	0	0	1	0	57274	0	0
Q9DCG6	Q9DCG6	Phenazine biosynthesis-like domain-containing protein 1	Pbld1	NaN	NaN	NaN	0	NaN	NaN	NaN	NaN	235760	NaN	819360	NaN	NaN	1	1	1	3.8	3.8	3.8	32.047	0.0037665	2.6912	735980	2	0	0	0	1	1	0	38736	0	0
Q9DCT8	Q9DCT8	Cysteine-rich protein 2	Crip2	NaN	NaN	NaN	0	NaN	NaN	NaN	NaN	NaN	NaN	3540600	NaN	NaN	2	2	2	23.1	23.1	23.1	22.727	0	9.9635	2006800	3	0	2	0	0	1	0	143340	0	0
Q9DD18	Q9DD18	D-tyrosyl-tRNA(Tyr) deacylase 1	Dtd1	NaN	NaN	NaN	0	NaN	NaN	NaN	NaN	NaN	NaN	1522200	NaN	NaN	2	2	2	14.8	14.8	14.8	23.384	0.00377	2.6918	298870	2	0	0	0	0	2	0	37359	0	0
Q9EPL0	Q9EPL0	Xylosyltransferase 2	Xylt2	NaN	NaN	NaN	0	NaN	NaN	NaN	50604	NaN	NaN	4146200	NaN	NaN	2	2	2	2.5	2.5	2.5	96.81	0	4.0327	3817400	7	1	1	0	2	1	0	100460	0	0
Q9EPL8	Q9EPL8	Importin-7	Ipo7	NaN	NaN	NaN	0	NaN	NaN	NaN	142810	NaN	NaN	1576300	NaN	NaN	3	3	3	3.7	3.7	3.7	119.49	0	9.5903	1511300	5	2	2	0	1	1	0	32154	0	0
Q9EPU5	Q9EPU5	Tumor necrosis factor receptor superfamily member 21	Tnfrsf21	NaN	NaN	NaN	0	NaN	NaN	NaN	NaN	NaN	NaN	NaN	3042800	NaN	3	3	3	5.6	5.6	5.6	71.982	0	4.3695	3042800	3	0	0	3	0	0	0	80074	0	0
Q9EQC7	Q9EQC7	Follistatin-related protein 3	Fstl3	NaN	NaN	NaN	0	NaN	NaN	NaN	NaN	245230	NaN	NaN	224120	NaN	2	2	2	16.8	16.8	16.8	27.271	0	5.6491	3562000	3	0	0	1	1	0	0	274000	0	0
Q9EQG7	Q9EQG7	Ectonucleotide pyrophosphatase/phosphodiesterase family member 5	Enpp5	NaN	NaN	NaN	0	NaN	NaN	NaN	327820	NaN	3973600	NaN	NaN	NaN	1	1	1	2.1	2.1	2.1	54.386	0.0091324	2.3804	7215300	8	1	1	0	1	1	0	343580	0	0
Q9EQJ9	Q9EQJ9	Membrane-associated guanylate kinase, WW and PDZ domain-containing protein 3	Magi3	NaN	NaN	NaN	0	NaN	NaN	NaN	NaN	NaN	NaN	NaN	NaN	91723	1	1	1	1.8	1.8	1.8	161.67	0.0091158	2.3679	722380	2	0	0	1	0	0	1	7684.9	0	0
Q9ESS0	Q9ESS0	Dual specificity protein phosphatase 10	Dusp10	NaN	NaN	NaN	0	NaN	NaN	NaN	NaN	NaN	NaN	NaN	NaN	525910	1	1	1	2.9	2.9	2.9	52.531	0.0096661	2.1215	19997000	2	0	0	1	0	0	1	833200	0	0
Q9JHK5	Q9JHK5	Pleckstrin	Plek	NaN	NaN	NaN	0	NaN	NaN	NaN	NaN	717260	NaN	2346000	NaN	204960	3	3	3	12.3	12.3	12.3	39.9	0	3.4968	12664000	4	1	1	1	2	1	1	744940	0	0
Q9JI46	Q9JI46	Diphosphoinositol polyphosphate phosphohydrolase 1	Nudt3	NaN	NaN	NaN	0	NaN	NaN	NaN	NaN	300350	NaN	11244000	NaN	NaN	2	2	2	14.3	14.3	14.3	19.029	0	4.9434	4809300	6	1	1	0	2	2	0	437210	0	0
Q9JI91	Q9JI91	Alpha-actinin-2	Actn2	NaN	NaN	NaN	0	NaN	NaN	NaN	NaN	473470	29869000	NaN	NaN	NaN	20	9	8	26.2	13.2	11.3	103.83	0	193.91	16746000	10	1	8	0	1	0	0	270090	0	0
Q9JIK5	Q9JIK5	Nucleolar RNA helicase 2	Ddx21	NaN	NaN	NaN	0	NaN	NaN	NaN	NaN	NaN	NaN	NaN	559330	NaN	2	2	2	4.7	4.7	4.7	93.55	0.0096831	2.1563	8428300	2	0	0	2	0	0	1	162080	0	0
Q9JKF1	Q9JKF1	Ras GTPase-activating-like protein IQGAP1	Iqgap1	NaN	NaN	NaN	0	NaN	NaN	NaN	NaN	90396	NaN	NaN	NaN	42496	2	2	2	2.4	2.4	2.4	188.74	0	3.3725	3249300	3	0	0	1	1	0	1	34203	0	0
Q9JKF6	Q9JKF6	Nectin-1	Pvrl1	NaN	NaN	NaN	0	NaN	NaN	NaN	NaN	NaN	NaN	3298700	NaN	NaN	1	1	1	2.9	2.9	2.9	57.034	0.0096491	2.1165	1816500	1	0	1	0	0	1	0	67279	0	0
Q9JLF6	Q9JLF6	Protein-glutamine gamma-glutamyltransferase K	Tgm1	NaN	NaN	NaN	0	NaN	NaN	NaN	NaN	NaN	1256200	NaN	NaN	184890	3	3	3	6	6	6	89.825	0	10.057	5954400	2	0	2	1	0	1	1	124050	0	0
Q9JLN9	Q9JLN9	Serine/threonine-protein kinase mTOR	Mtor	NaN	NaN	NaN	0	NaN	NaN	NaN	64326	NaN	NaN	NaN	NaN	NaN	1	1	1	1.2	1.2	1.2	288.79	0.0037736	2.6924	64326	1	1	0	0	0	0	0	423.2	0	0
Q9JLV5	Q9JLV5	Cullin-3	Cul3	NaN	NaN	NaN	0	NaN	NaN	NaN	NaN	NaN	NaN	1949900	NaN	327750	2	2	2	4.8	4.8	4.8	88.947	0	3.7636	3507500	4	0	1	0	0	1	1	68775	0	0
Q9QUI0;Q62159;P62746	Q9QUI0;Q62159	Transforming protein RhoA;Rho-related GTP-binding protein RhoC	Rhoa;Rhoc	NaN	NaN	NaN	0	NaN	NaN	NaN	NaN	104350	NaN	4886900	62174	NaN	3	3	3	22.3	22.3	22.3	21.782	0	4.0959	3490000	4	1	0	1	1	1	0	290830	0	0
Q9QUK4	Q9QUK4	Baculoviral IAP repeat-containing protein 1b	Naip2	NaN	NaN	NaN	0	NaN	NaN	NaN	NaN	413510	757980	NaN	NaN	NaN	2	2	2	4.1	4.1	4.1	164.08	0.0097865	2.1949	11304000	5	1	1	0	1	0	0	146810	0	0
Q9QUR6	Q9QUR6	Prolyl endopeptidase	Prep	NaN	NaN	NaN	0	NaN	NaN	NaN	NaN	155030	4250300	NaN	NaN	NaN	1	1	1	2.4	2.4	2.4	80.751	0	10.424	10578000	3	1	1	0	1	0	0	215870	0	0
Q9QXK3;Q9QZE5	Q9QXK3;Q9QZE5	Coatomer subunit gamma-2;Coatomer subunit gamma-1	Copg2;Copg1	NaN	NaN	NaN	0	NaN	NaN	NaN	NaN	NaN	3164900	NaN	NaN	NaN	1	1	1	1.4	1.4	1.4	97.679	0	3.7418	945970	1	0	1	0	0	0	0	19708	0	0
Q9QY76;Q9WV55	Q9QY76;Q9WV55	Vesicle-associated membrane protein-associated protein B;Vesicle-associated membrane protein-associated protein A	Vapb;Vapa	NaN	NaN	NaN	0	NaN	NaN	NaN	165460	NaN	480220	NaN	NaN	NaN	2	2	2	11.5	11.5	11.5	26.946	0.0028517	2.7784	638410	2	1	1	0	1	0	0	37554	0	0
Q9QYG0	Q9QYG0	Protein NDRG2	Ndrg2	NaN	NaN	NaN	0	NaN	NaN	NaN	NaN	174600	NaN	2764700	NaN	NaN	3	3	3	10.8	10.8	10.8	40.789	0	9.9442	6032700	2	2	3	0	2	3	0	317510	0	0
Q9QYJ0	Q9QYJ0	DnaJ homolog subfamily A member 2	Dnaja2	NaN	NaN	NaN	0	NaN	NaN	NaN	NaN	222350	NaN	2256000	NaN	NaN	2	2	2	11.4	11.4	11.4	45.745	0	9.2782	6929000	4	1	1	0	1	2	0	277160	0	0
Q9QYK4	Q9QYK4	Heparan-sulfate 6-O-sulfotransferase 3	Hs6st3	NaN	NaN	NaN	0	NaN	NaN	NaN	NaN	138720	NaN	5752400	NaN	NaN	1	1	1	2.3	2.3	2.3	55.036	0	3.3169	4745800	3	1	1	0	1	1	0	175770	0	0
Q9QYM9	Q9QYM9	Tomoregulin-2	Tmeff2	NaN	NaN	NaN	0	NaN	NaN	NaN	NaN	340560	NaN	8278300	NaN	NaN	1	1	1	3.2	3.2	3.2	41.415	0	28.197	14271000	8	1	1	0	1	1	1	713530	0	0
Q9QZ47	Q9QZ47	Troponin T, fast skeletal muscle	Tnnt3	NaN	NaN	NaN	0	NaN	NaN	NaN	NaN	NaN	1301700	NaN	NaN	NaN	1	1	1	5.1	5.1	5.1	32.24	0	3.694	723700	1	0	1	0	0	0	0	51693	0	0
Q9R059	Q9R059	Four and a half LIM domains protein 3	Fhl3	NaN	NaN	NaN	0	NaN	NaN	NaN	NaN	NaN	NaN	2620400	NaN	NaN	2	2	2	10.4	10.4	10.4	31.794	0	9.6235	2813000	2	0	2	0	0	2	0	175810	0	0
Q9R0G6	Q9R0G6	Cartilage oligomeric matrix protein	Comp	NaN	NaN	NaN	0	NaN	NaN	NaN	NaN	303630	NaN	2571500	NaN	275710	9	3	3	11.1	6.6	6.6	82.341	0	11.263	4219900	4	1	1	1	1	1	1	111050	0	0
Q9R0M0	Q9R0M0	Cadherin EGF LAG seven-pass G-type receptor 2	Celsr2	NaN	NaN	NaN	0	NaN	NaN	NaN	NaN	NaN	NaN	435590	NaN	NaN	1	1	1	0.8	0.8	0.8	317.59	0	9.5744	958050	1	0	1	0	0	1	0	6794.7	0	0
Q9R0P5	Q9R0P5	Destrin	Dstn	NaN	NaN	NaN	0	NaN	NaN	NaN	213620	NaN	NaN	1360100	254020	NaN	4	4	4	26.1	26.1	26.1	18.521	0	8.9128	3190400	5	2	1	2	0	1	1	245420	0	0
Q9R182	Q9R182	Angiopoietin-related protein 3	Angptl3	NaN	NaN	NaN	0	NaN	NaN	NaN	NaN	NaN	5230200	NaN	NaN	NaN	2	2	2	4.8	4.8	4.8	52.542	0	4.6681	15821000	5	0	1	0	0	2	0	659200	0	0
Q9R1V7	Q9R1V7	Disintegrin and metalloproteinase domain-containing protein 23	Adam23	NaN	NaN	NaN	0	NaN	NaN	NaN	NaN	1884700	NaN	5493600	NaN	NaN	3	3	3	4.7	4.7	4.7	91.547	0	4.1415	25538000	4	1	1	0	1	2	0	593910	0	0
Q9WTI7	Q9WTI7	Unconventional myosin-Ic	Myo1c	NaN	NaN	NaN	0	NaN	NaN	NaN	NaN	NaN	NaN	NaN	NaN	78959	1	1	1	2.5	2.5	2.5	121.94	0.0099099	2.2565	241410	1	0	0	0	0	0	1	3657.7	0	0
Q9WTZ2	Q9WTZ2	Membrane-bound transcription factor site-1 protease	Mbtps1	NaN	NaN	NaN	0	NaN	NaN	NaN	117460	NaN	NaN	3806000	NaN	NaN	1	1	1	2.4	2.4	2.4	117.46	0	15.359	2761500	3	1	1	0	1	1	0	61366	0	0
Q9WU84	Q9WU84	Copper chaperone for superoxide dismutase	Ccs	NaN	NaN	NaN	0	NaN	NaN	NaN	NaN	337170	NaN	1789300	NaN	NaN	2	2	2	7.7	7.7	7.7	28.911	0	7.2485	2396400	4	1	1	0	1	2	0	171170	0	0
Q9WUA3	Q9WUA3	ATP-dependent 6-phosphofructokinase, platelet type	Pfkp	NaN	NaN	NaN	0	NaN	NaN	NaN	NaN	176060	NaN	2170100	NaN	NaN	2	2	1	4.6	4.6	2.2	85.454	0	55.614	3988200	4	1	1	0	1	1	0	107790	0	0
Q9WUB3	Q9WUB3	Glycogen phosphorylase, muscle form	Pygm	NaN	NaN	NaN	0	NaN	NaN	NaN	NaN	NaN	12198000	NaN	NaN	NaN	9	5	5	12.1	8.7	8.7	97.285	0	9.3164	6782000	6	0	5	0	0	0	0	118980	0	0
Q9WUD1	Q9WUD1	STIP1 homology and U box-containing protein 1	Stub1	NaN	NaN	NaN	0	NaN	NaN	NaN	NaN	312240	NaN	2598300	NaN	NaN	3	3	3	9.9	9.9	9.9	34.909	0.0096238	2.1002	7077400	3	1	1	0	2	1	0	294890	0	0
Q9WUM4	Q9WUM4	Coronin-1C	Coro1c	NaN	NaN	NaN	0	NaN	NaN	NaN	NaN	NaN	NaN	739640	NaN	722610	1	1	1	3.4	3.4	3.4	53.12	0	64.88	10288000	5	0	1	1	0	1	1	428650	0	0
Q9WVG5	Q9WVG5	Endothelial lipase	Lipg	NaN	NaN	NaN	0	NaN	NaN	NaN	NaN	81317	NaN	1261400	NaN	NaN	2	2	2	8.8	8.8	8.8	56.628	0	6.236	3360600	2	1	1	0	1	1	0	124470	0	0
Q9WVJ2	Q9WVJ2	26S proteasome non-ATPase regulatory subunit 13	Psmd13	NaN	NaN	NaN	0	NaN	NaN	NaN	NaN	450040	NaN	NaN	NaN	NaN	2	2	2	7.4	7.4	7.4	42.809	0	4.5655	2785700	2	1	0	0	2	0	0	107140	0	0
Q9Z0E2	Q9Z0E2	Chordin	Chrd	NaN	NaN	NaN	0	NaN	NaN	NaN	NaN	104620	3779900	NaN	NaN	NaN	2	2	2	2.6	2.6	2.6	101.51	0.0094828	2.0145	2525100	3	1	1	0	1	1	0	56113	0	0
Q9Z0K8	Q9Z0K8	Pantetheinase	Vnn1	NaN	NaN	NaN	0	NaN	NaN	NaN	1648700	NaN	NaN	194860000	1980500	NaN	1	1	1	2.5	2.5	2.5	57.091	0	10.133	328310000	13	1	1	1	1	1	1	14274000	0	0
Q9Z0M9	Q9Z0M9	Interleukin-18-binding protein	Il18bp	NaN	NaN	NaN	0	NaN	NaN	NaN	NaN	700180	NaN	1307400	NaN	57231	1	1	1	6.2	6.2	6.2	21.257	0	3.896	12155000	9	1	1	1	1	1	1	1012900	0	0
Q9Z0T9	Q9Z0T9	Integrin beta-6	Itgb6	NaN	NaN	NaN	0	NaN	NaN	NaN	1698300	NaN	NaN	61354000	NaN	NaN	1	1	1	1.1	1.1	1.1	86.041	0.00097087	3.0919	63558000	8	1	1	0	1	1	0	1589000	0	0
Q9Z0Z4	Q9Z0Z4	Hephaestin	Heph	NaN	NaN	NaN	0	NaN	NaN	NaN	NaN	NaN	NaN	1567200	25687	NaN	2	2	2	1.8	1.8	1.8	129.66	0	4.1756	1522300	2	0	1	1	0	1	0	29849	0	0
Q9Z1M7	Q9Z1M7	Glycosyltransferase-like protein LARGE1;Xylosyltransferase LARGE;Beta-1,3-glucuronyltransferase LARGE	Large	NaN	NaN	NaN	0	NaN	NaN	NaN	NaN	NaN	2135000	NaN	NaN	NaN	2	2	2	3	3	3	87.963	0	6.062	934880	2	0	2	0	0	1	0	19079	0	0
Q9Z2H6	Q9Z2H6	C-type lectin domain family 4 member D	Clec4d	NaN	NaN	NaN	0	NaN	NaN	NaN	NaN	NaN	NaN	NaN	NaN	NaN	1	1	1	5	5	5	25.619	0.0098743	2.2359	0	1	0	0	0	0	1	0	0	0	0
Q9Z2X1	Q9Z2X1	Heterogeneous nuclear ribonucleoprotein F;Heterogeneous nuclear ribonucleoprotein F, N-terminally processed	Hnrnpf	NaN	NaN	NaN	0	NaN	NaN	NaN	NaN	95175	NaN	NaN	NaN	NaN	1	1	1	4.1	4.1	4.1	45.729	0	16.782	582710	1	1	0	0	1	0	0	25335	0	0

## Sheet: STAT
	CON_1	CPDJ_1	CON_2	CPDJ_2	CON_3	CPDJ_3
Unique peptides	4133	5861	2599	4548	5674	2765
Quants	589	749	697	793	369	442
	Exp_1	Exp_2	Exp_3
Relatively Quantified	291	371	152

## Sheet: Volcano
Protein IDs	Majority protein IDs	Protein names	Gene names	Mean Ratio (CPDJ/CON)	Mean log2 (CPDJ/CON)	minus log10 p	ttest p	QUANTS
Q02105	Q02105	Complement C1q subcomponent subunit C	C1qc	1.74993	0.8073	3.15861	0.000694056	3
P29533	P29533	Vascular cell adhesion protein 1	Vcam1	0.196215	-2.34949	2.39176	0.00405731	3
Q70E20	Q70E20	Sushi, nidogen and EGF-like domain-containing protein 1	Sned1	1.19752	0.260049	2.18443	0.00653995	3
Q07797	Q07797	Galectin-3-binding protein	Lgals3bp	1.07077	0.0986431	2.01718	0.00961218	3
Q61508	Q61508	Extracellular matrix protein 1	Ecm1	1.25406	0.326612	1.85709	0.0138967	3
Q8BFR4	Q8BFR4	N-acetylglucosamine-6-sulfatase	Gns	1.35795	0.441428	1.73777	0.0182906	3
P14094	P14094	Sodium/potassium-transporting ATPase subunit beta-1	Atp1b1	1.41241	0.498154	1.59096	0.0256471	3
Q9QYB1	Q9QYB1	Chloride intracellular channel protein 4	Clic4	1.24071	0.311164	1.558	0.0276694	3
Q9D6X6	Q9D6X6	Serine protease 23	Prss23	1.35484	0.438126	1.50083	0.0315624	3
P98064	P98064	Mannan-binding lectin serine protease 1;Mannan-binding lectin serine protease 1 heavy chain;Mannan-binding lectin serine protease 1 light chain	Masp1	0.726031	-0.461897	1.46709	0.0341124	3
P28653	P28653	Biglycan	Bgn	1.33925	0.421425	1.46603	0.0341956	3
Q9CYK2	Q9CYK2	Glutaminyl-peptide cyclotransferase	Qpct	0.93167	-0.102109	1.46146	0.0345574	3
Q8JZM4	Q8JZM4	Delta and Notch-like epidermal growth factor-related receptor	Dner	0.268836	-1.8952	1.43447	0.0367731	3
Q8BJD1	Q8BJD1	Inter-alpha-trypsin inhibitor heavy chain H5	Itih5	1.2833	0.359856	1.41963	0.0380517	3
Q9DC11	Q9DC11	Plexin domain-containing protein 2	Plxdc2	0.645861	-0.630705	1.3288	0.0469027	3
P16092	P16092	Fibroblast growth factor receptor 1	Fgfr1	0.524835	-0.930065	1.32665	0.0471359	3
Q8C4U3	Q8C4U3	Secreted frizzled-related protein 1	Sfrp1	1.64906	0.721645	1.2457	0.0567932	3
Q9QUM9	Q9QUM9	Proteasome subunit alpha type-6	Psma6	1.18216	0.241425	1.15055	0.0707054	3
P07214	P07214	SPARC	Sparc	0.795803	-0.329517	1.14659	0.071352	3
Q8CCH2	Q8CCH2	NHL repeat-containing protein 3	Nhlrc3	1.55436	0.636322	1.14202	0.072108	3
P48759	P48759	Pentraxin-related protein PTX3	Ptx3	1.97307	0.980445	1.11145	0.0773658	3
O88632;O08665	O88632	Semaphorin-3F	Sema3f	1.44718	0.533247	1.09077	0.0811397	3
Q03350	Q03350	Thrombospondin-2	Thbs2	1.17904	0.237609	1.09046	0.0811971	3
Q9JM58	Q9JM58	Cytokine receptor-like factor 1	Crlf1	1.40034	0.485773	1.0866	0.0819215	3
O88207	O88207	Collagen alpha-1(V) chain	Col5a1	1.06095	0.0853575	1.00237	0.0994566	3
B2RXS4	B2RXS4	Plexin-B2	Plxnb2	1.39884	0.484232	0.963768	0.108701	3
Q61592	Q61592	Growth arrest-specific protein 6	Gas6	1.36773	0.451786	0.95702	0.110403	3
Q9EQS9	Q9EQS9	Immunoglobulin superfamily DCC subclass member 4	Igdcc4	1.36851	0.45261	0.938625	0.115179	3
P11087;CON__Q862S4	P11087	Collagen alpha-1(I) chain	Col1a1	0.881277	-0.182333	0.924916	0.118873	3
Q08879	Q08879	Fibulin-1	Fbln1	1.12497	0.169884	0.912757	0.122248	3
Q8BMS2	Q8BMS2	Spondin-2	Spon2	1.56445	0.645651	0.910592	0.122859	3
Q62000	Q62000	Mimecan	Ogn	1.15639	0.209631	0.899547	0.126024	3
O35310	O35310	Heparan sulfate glucosamine 3-O-sulfotransferase 1	Hs3st1	1.42646	0.512443	0.899542	0.126025	3
P21180	P21180	Complement C2;Complement C2b fragment;Complement C2a fragment	C2	1.68633	0.753889	0.896334	0.12696	3
P58252	P58252	Elongation factor 2	Eef2	0.774146	-0.369322	0.870694	0.134681	3
Q9EPL2	Q9EPL2	Calsyntenin-1;Soluble Alc-alpha;CTF1-alpha	Clstn1	1.20654	0.270875	0.855199	0.139573	3
Q8VCF1	Q8VCF1	Soluble calcium-activated nucleotidase 1	Cant1	1.39826	0.483631	0.849503	0.141416	3
Q9CQ01	Q9CQ01	Ribonuclease T2	Rnaset2	0.784637	-0.349903	0.836686	0.145651	3
P23336	P23336	N-acetyllactosaminide alpha-1,3-galactosyltransferase	Ggta1	1.32001	0.400553	0.80388	0.15708	3
P10605	P10605	Cathepsin B;Cathepsin B light chain;Cathepsin B heavy chain	Ctsb	1.66113	0.732162	0.799425	0.158699	3
Q61362	Q61362	Chitinase-3-like protein 1	Chi3l1	1.27929	0.355343	0.795806	0.160027	3
Q8CG16;Q8CFG9;Q3UZ09	Q8CG16;Q8CFG9	Complement C1r-A subcomponent;Complement C1r-A subcomponent heavy chain;Complement C1r-A subcomponent light chain;Complement C1r-B subcomponent;Complement C1r-B subcomponent heavy chain;Complement C1r-B subcomponent light chain	C1ra;C1rb	1.29446	0.372353	0.793489	0.160883	3
P61982	P61982	14-3-3 protein gamma;14-3-3 protein gamma, N-terminally processed	Ywhag	1.18588	0.245953	0.788286	0.162822	3
P12023	P12023	Amyloid beta A4 protein;N-APP;Soluble APP-alpha;Soluble APP-beta;C99;Beta-amyloid protein 42;Beta-amyloid protein 40;C83;P3(42);P3(40);C80;Gamma-secretase C-terminal fragment 59;Gamma-secretase C-terminal fragment 57;Gamma-secretase C-terminal fragment 50;C31	App	1.25505	0.327742	0.78146	0.165402	3
O09114	O09114	Prostaglandin-H2 D-isomerase	Ptgds	1.22883	0.297288	0.773941	0.16829	3
Q9R0E2	Q9R0E2	Procollagen-lysine,2-oxoglutarate 5-dioxygenase 1	Plod1	1.2729	0.348117	0.767353	0.170863	3
P55065	P55065	Phospholipid transfer protein	Pltp	1.14929	0.200746	0.767198	0.170924	3
Q6DIB5	Q6DIB5	Multiple epidermal growth factor-like domains protein 10	Megf10	0.656949	-0.606146	0.766234	0.171303	3
Q91ZX7	Q91ZX7	Prolow-density lipoprotein receptor-related protein 1;Low-density lipoprotein receptor-related protein 1 85 kDa subunit;Low-density lipoprotein receptor-related protein 1 515 kDa subunit;Low-density lipoprotein receptor-related protein 1 intracellular domain	Lrp1	1.22035	0.287291	0.766019	0.171388	3
Q640N1	Q640N1	Adipocyte enhancer-binding protein 1	Aebp1	1.22949	0.298056	0.759085	0.174147	3
O09164	O09164	Extracellular superoxide dismutase [Cu-Zn]	Sod3	0.759453	-0.396968	0.758568	0.174354	3
Q9QXV0	Q9QXV0	ProSAAS;KEP;Big SAAS;Little SAAS;Big PEN-LEN;PEN;PEN-20;PEN-19;Little LEN;Big LEN	Pcsk1n	1.51545	0.599751	0.738389	0.182646	3
O35696	O35696	Alpha-2,8-sialyltransferase 8B	St8sia2	0.862111	-0.214055	0.737893	0.182855	3
P11152	P11152	Lipoprotein lipase	Lpl	1.19419	0.25603	0.728994	0.186641	3
O88531	O88531	Palmitoyl-protein thioesterase 1	Ppt1	0.712262	-0.489521	0.719393	0.190812	3
Q5MJS3	Q5MJS3	Extracellular serine/threonine protein kinase FAM20C	Fam20c	1.14722	0.19814	0.704938	0.19727	3
P52480;P53657	P52480	Pyruvate kinase PKM	Pkm	1.34895	0.431834	0.702511	0.198376	3
P70663	P70663	SPARC-like protein 1	Sparcl1	1.26262	0.336423	0.677113	0.210323	3
P97298	P97298	Pigment epithelium-derived factor	Serpinf1	0.905952	-0.142494	0.630001	0.234422	3
P55066	P55066	Neurocan core protein	Ncan	1.23472	0.304183	0.627543	0.235753	3
O88307	O88307	Sortilin-related receptor	Sorl1	0.816996	-0.2916	0.626826	0.236142	3
Q6S5C2	Q6S5C2	N-acetylglucosamine-1-phosphotransferase subunit gamma	Gnptg	1.27733	0.353135	0.624308	0.237516	3
Q62356	Q62356	Follistatin-related protein 1	Fstl1	0.753954	-0.407451	0.618268	0.240842	3
B9EKR1	B9EKR1	Receptor-type tyrosine-protein phosphatase zeta	Ptprz1	1.05376	0.0755467	0.608547	0.246294	3
Q8R4G6	Q8R4G6	Alpha-1,6-mannosylglycoprotein 6-beta-N-acetylglucosaminyltransferase A	Mgat5	1.35682	0.440225	0.599145	0.251683	3
P50247	P50247	Adenosylhomocysteinase	Ahcy	1.35018	0.433157	0.596821	0.253034	3
P62984;P62983;P0CG49;P0CG50	P62984;P62983;P0CG49;P0CG50	Ubiquitin-60S ribosomal protein L40;Ubiquitin;60S ribosomal protein L40;Ubiquitin-40S ribosomal protein S27a;Ubiquitin;40S ribosomal protein S27a;Polyubiquitin-B;Ubiquitin;Polyubiquitin-C;Ubiquitin;Ubiquitin-related 1;Ubiquitin-related 2	Uba52;Rps27a;Ubb;Ubc	0.885266	-0.175816	0.592328	0.255665	3
P10493	P10493	Nidogen-1	Nid1	1.06852	0.0956123	0.591851	0.255947	3
Q5RJI4	Q5RJI4	Extracellular tyrosine-protein kinase PKDCC	Pkdcc	1.18494	0.24481	0.589408	0.25739	3
P70389	P70389	Insulin-like growth factor-binding protein complex acid labile subunit	Igfals	1.56105	0.642514	0.587036	0.2588	3
Q80W15	Q80W15	Insulin-like growth factor-binding protein-like 1	Igfbpl1	1.19655	0.258881	0.586299	0.25924	3
O88322	O88322	Nidogen-2	Nid2	1.10319	0.141683	0.580233	0.262886	3
Q02819	Q02819	Nucleobindin-1	Nucb1	1.14769	0.198739	0.571061	0.268497	3
P63101	P63101	14-3-3 protein zeta/delta	Ywhaz	1.12517	0.170145	0.555509	0.278286	3
Q06890	Q06890	Clusterin;Clusterin beta chain;Clusterin alpha chain	Clu	0.913505	-0.130515	0.554951	0.278644	3
P62259	P62259	14-3-3 protein epsilon	Ywhae	0.985325	-0.0213277	0.552187	0.280423	3
Q04857	Q04857	Collagen alpha-1(VI) chain	Col6a1	1.22894	0.29741	0.547165	0.283684	3
Q923D2	Q923D2	Flavin reductase (NADPH)	Blvrb	1.31101	0.390683	0.542454	0.286778	3
Q61398	Q61398	Procollagen C-endopeptidase enhancer 1	Pcolce	1.12172	0.165714	0.535809	0.2912	3
Q9R1Q9	Q9R1Q9	V-type proton ATPase subunit S1	Atp6ap1	1.56802	0.648942	0.528257	0.296308	3
Q3TA59	Q3TA59	JmjC domain-containing protein 8	Jmjd8	0.829211	-0.270188	0.527899	0.296552	3
Q3UPI1	Q3UPI1	Protein FAM198B	Fam198b	1.03212	0.0456168	0.525631	0.298105	3
P16125	P16125	L-lactate dehydrogenase B chain	Ldhb	0.823307	-0.280497	0.519845	0.302103	3
P11276	P11276	Fibronectin;Anastellin	Fn1	1.15568	0.208743	0.51768	0.303612	3
Q02053;P31254	Q02053	Ubiquitin-like modifier-activating enzyme 1	Uba1	1.22228	0.289575	0.51332	0.306676	3
Q01149	Q01149	Collagen alpha-2(I) chain	Col1a2	0.889911	-0.168267	0.505152	0.312498	3
Q9R0B9	Q9R0B9	Procollagen-lysine,2-oxoglutarate 5-dioxygenase 2	Plod2	0.894711	-0.160507	0.50271	0.31426	3
P06909	P06909	Complement factor H	Cfh	0.902797	-0.147526	0.500811	0.315638	3
Q61112	Q61112	45 kDa calcium-binding protein	Sdf4	0.773581	-0.370375	0.495994	0.319158	3
Q9QUN9	Q9QUN9	Dickkopf-related protein 3	Dkk3	0.825462	-0.276726	0.491537	0.322451	3
Q8BU25	Q8BU25	Inactive serine protease PAMR1	Pamr1	1.21262	0.278122	0.489808	0.323737	3
P14152	P14152	Malate dehydrogenase, cytoplasmic	Mdh1	0.810634	-0.302877	0.484775	0.32751	3
P33434	P33434	72 kDa type IV collagenase;PEX	Mmp2	1.19877	0.26156	0.480895	0.330449	3
P37889	P37889	Fibulin-2	Fbln2	0.932904	-0.100199	0.479223	0.331724	3
Q9WVJ9	Q9WVJ9	EGF-containing fibulin-like extracellular matrix protein 2	Efemp2	0.901464	-0.149658	0.475017	0.334952	3
P02463	P02463	Collagen alpha-1(IV) chain;Arresten	Col4a1	0.696995	-0.52078	0.462329	0.344882	3
Q61810	Q61810	Latent-transforming growth factor beta-binding protein 3	Ltbp3	1.28305	0.359574	0.455418	0.350414	3
Q9JHI0	Q9JHI0	Matrix metalloproteinase-19	Mmp19	1.62621	0.701509	0.450319	0.354553	3
P17182;P17183	P17182	Alpha-enolase	Eno1	0.696433	-0.521944	0.44981	0.354969	3
P48441	P48441	Alpha-L-iduronidase	Idua	1.24027	0.310658	0.446323	0.35783	3
Q9JK53	Q9JK53	Prolargin	Prelp	1.21269	0.278217	0.437165	0.365456	3
P12032	P12032	Metalloproteinase inhibitor 1	Timp1	0.757979	-0.399771	0.427416	0.373753	3
Q8BND5	Q8BND5	Sulfhydryl oxidase 1	Qsox1	1.19311	0.254733	0.426773	0.374306	3
Q9CZT5	Q9CZT5	Vasorin	Vasn	0.896101	-0.158266	0.421922	0.378511	3
Q61696;P17879;P16627	Q61696;P17879;P16627	Heat shock 70 kDa protein 1A;Heat shock 70 kDa protein 1B;Heat shock 70 kDa protein 1-like	Hspa1a;Hspa1b;Hspa1l	1.16854	0.224709	0.421806	0.378611	3
P70168	P70168	Importin subunit beta-1	Kpnb1	1.14703	0.1979	0.415571	0.384087	3
Q00493	Q00493	Carboxypeptidase E	Cpe	1.07012	0.0977714	0.415568	0.384089	3
Q91WP6;Q5I2A0;Q03734;Q6P4P1	Q91WP6	Serine protease inhibitor A3N	Serpina3n	1.3034	0.382277	0.413429	0.385985	3
Q61001	Q61001	Laminin subunit alpha-5	Lama5	1.43949	0.525558	0.412519	0.386795	3
A2ASQ1	A2ASQ1	Agrin;Agrin N-terminal 110 kDa subunit;Agrin C-terminal 110 kDa subunit;Agrin C-terminal 90 kDa fragment;Agrin C-terminal 22 kDa fragment	Agrn	1.17818	0.236563	0.409705	0.38931	3
P28798	P28798	Granulins;Acrogranin;Granulin-1;Granulin-2;Granulin-3;Granulin-4;Granulin-5;Granulin-6;Granulin-7	Grn	1.15322	0.205669	0.401787	0.396472	3
Q9JII6	Q9JII6	Alcohol dehydrogenase [NADP(+)]	Akr1a1	0.795352	-0.330334	0.399391	0.398666	3
P20029	P20029	78 kDa glucose-regulated protein	Hspa5	0.775766	-0.366307	0.395753	0.402019	3
Q8QZR4	Q8QZR4	Out at first protein homolog	Oaf	1.14428	0.194441	0.395046	0.402674	3
Q99NH8	Q99NH8	Triggering receptor expressed on myeloid cells 2	Trem2	1.40955	0.495236	0.392482	0.405058	3
Q04999	Q04999	Inhibin beta B chain	Inhbb	1.27787	0.35374	0.39038	0.407024	3
P18760;P45591	P18760	Cofilin-1	Cfl1	0.492312	-1.02236	0.388864	0.408448	3
Q9Z0L8	Q9Z0L8	Gamma-glutamyl hydrolase	Ggh	1.10921	0.149531	0.388729	0.408574	3
Q8BWP8	Q8BWP8	Beta-1,4-glucuronyltransferase 1	B4gat1	0.813754	-0.297335	0.388203	0.40907	3
Q8BRK9	Q8BRK9	Alpha-mannosidase 2x	Man2a2	1.56796	0.648885	0.385285	0.411827	3
P13595	P13595	Neural cell adhesion molecule 1	Ncam1	1.05321	0.0747922	0.376314	0.420422	3
P15379	P15379	CD44 antigen	Cd44	1.12338	0.167848	0.370148	0.426435	3
O54782	O54782	Epididymis-specific alpha-mannosidase	Man2b2	0.931174	-0.102877	0.370001	0.426579	3
Q8R464	Q8R464	Cell adhesion molecule 4	Cadm4	1.30785	0.387196	0.367252	0.429288	3
Q9QZF2	Q9QZF2	Glypican-1;Secreted glypican-1	Gpc1	1.09755	0.134293	0.367198	0.429341	3
Q6GQT1	Q6GQT1	Alpha-2-macroglobulin-P	A2mp	0.797797	-0.325907	0.366878	0.429657	3
Q8CG14	Q8CG14	Complement C1s-A subcomponent;Complement C1s-A subcomponent heavy chain;Complement C1s-A subcomponent light chain	C1sa	1.05694	0.079887	0.366812	0.429722	3
Q06335	Q06335	Amyloid-like protein 2	Aplp2	1.07879	0.109411	0.355649	0.440911	3
Q9Z0P5	Q9Z0P5	Twinfilin-2	Twf2	0.734398	-0.445366	0.353501	0.443097	3
Q8K4G1	Q8K4G1	Latent-transforming growth factor beta-binding protein 4	Ltbp4	1.12879	0.174779	0.348812	0.447907	3
Q8BJ66	Q8BJ66	Kazal-type serine protease inhibitor domain-containing protein 1	Kazald1	1.44403	0.530102	0.346823	0.449963	3
P14106	P14106	Complement C1q subcomponent subunit B	C1qb	1.32046	0.401045	0.344158	0.452732	3
Q9JHE3	Q9JHE3	Neutral ceramidase;Neutral ceramidase soluble form	Asah2	0.877143	-0.189116	0.342825	0.454125	3
Q60847	Q60847	Collagen alpha-1(XII) chain	Col12a1	0.933324	-0.0995495	0.341635	0.455371	3
Q64727	Q64727	Vinculin	Vcl	0.808664	-0.306387	0.33866	0.458501	3
P50608	P50608	Fibromodulin	Fmod	0.817336	-0.290999	0.334839	0.462553	3
Q3TCN2	Q3TCN2	Putative phospholipase B-like 2;Putative phospholipase B-like 2 28 kDa form;Putative phospholipase B-like 2 40 kDa form;Putative phospholipase B-like 2 15 kDa form	Plbd2	1.24563	0.316881	0.33153	0.46609	3
Q61361	Q61361	Brevican core protein	Bcan	1.10856	0.148693	0.326293	0.471745	3
O08709	O08709	Peroxiredoxin-6	Prdx6	0.734571	-0.445025	0.321412	0.477076	3
Q8VE43	Q8VE43	Meteorin-like protein	Metrnl	0.864412	-0.21021	0.309847	0.489951	3
P07901;REV__Q8BL66	P07901	Heat shock protein HSP 90-alpha	Hsp90aa1	1.10704	0.146712	0.307077	0.493087	3
P06151;P00342	P06151	L-lactate dehydrogenase A chain	Ldha	1.08672	0.119979	0.304597	0.49591	3
Q8BV57	Q8BV57	Soluble scavenger receptor cysteine-rich domain-containing protein SSC5D	Ssc5d	0.915234	-0.127788	0.303725	0.496907	3
O35103	O35103	Osteomodulin	Omd	0.880253	-0.184009	0.302342	0.498491	3
Q01279	Q01279	Epidermal growth factor receptor	Egfr	0.719041	-0.475855	0.301055	0.499971	3
Q99M71	Q99M71	Mammalian ependymin-related protein 1	Epdr1	1.30648	0.385688	0.297585	0.503981	3
P16858;Q64467;REV__Q9Z2B5	P16858	Glyceraldehyde-3-phosphate dehydrogenase	Gapdh	0.822073	-0.282662	0.294589	0.507471	3
Q9QUR8	Q9QUR8	Semaphorin-7A	Sema7a	0.863285	-0.212091	0.278908	0.526129	3
P21460;Q8CCP0	P21460	Cystatin-C	Cst3	1.28408	0.360737	0.276703	0.528807	3
Q3U962	Q3U962	Collagen alpha-2(V) chain	Col5a2	0.975655	-0.0355563	0.275514	0.530257	3
Q9Z175	Q9Z175	Lysyl oxidase homolog 3	Loxl3	0.870754	-0.199663	0.269786	0.537297	3
O09010	O09010	Beta-1,3-N-acetylglucosaminyltransferase lunatic fringe	Lfng	0.794698	-0.331522	0.267647	0.539949	3
Q91ZJ9	Q91ZJ9	Hyaluronidase-1	Hyal1	1.12079	0.164519	0.262261	0.546688	3
P09581	P09581	Macrophage colony-stimulating factor 1 receptor	Csf1r	1.09639	0.132767	0.261354	0.54783	3
Q9R1P4	Q9R1P4	Proteasome subunit alpha type-1	Psma1	1.1743	0.231802	0.255635	0.555092	3
P16301	P16301	Phosphatidylcholine-sterol acyltransferase	Lcat	1.09446	0.130223	0.254064	0.557104	3
P68254	P68254	14-3-3 protein theta	Ywhaq	0.862017	-0.214213	0.253656	0.557627	3
O70370	O70370	Cathepsin S	Ctss	1.40263	0.488139	0.253416	0.557936	3
Q8VHI5	Q8VHI5	Vitrin	Vit	0.859961	-0.217657	0.252398	0.559245	3
Q9CQV8	Q9CQV8	14-3-3 protein beta/alpha;14-3-3 protein beta/alpha, N-terminally processed	Ywhab	1.07842	0.108917	0.252169	0.55954	3
Q7TMJ8	Q7TMJ8	Phosphoinositide-3-kinase-interacting protein 1	Pik3ip1	1.13069	0.177199	0.249218	0.563354	3
Q64299	Q64299	Protein NOV homolog	Nov	1.14359	0.193575	0.246886	0.566387	3
P35700	P35700	Peroxiredoxin-1	Prdx1	0.780603	-0.357339	0.242627	0.57197	3
Q810U4	Q810U4	Neuronal cell adhesion molecule	Nrcam	0.890474	-0.167355	0.241234	0.573807	3
Q8BPB5	Q8BPB5	EGF-containing fibulin-like extracellular matrix protein 1	Efemp1	1.11427	0.156104	0.233778	0.583744	3
Q8CG19	Q8CG19	Latent-transforming growth factor beta-binding protein 1	Ltbp1	0.855598	-0.224995	0.232822	0.58503	3
Q9R1V6	Q9R1V6	Disintegrin and metalloproteinase domain-containing protein 22	Adam22	0.818779	-0.288454	0.23268	0.585221	3
P58022	P58022	Lysyl oxidase homolog 2	Loxl2	1.06857	0.0956784	0.228047	0.591498	3
P39061	P39061	Collagen alpha-1(XVIII) chain;Endostatin	Col18a1	1.13988	0.188877	0.223424	0.597827	3
Q61554	Q61554	Fibrillin-1	Fbn1	0.910083	-0.13593	0.223081	0.5983	3
O35664	O35664	Interferon alpha/beta receptor 2	Ifnar2	1.11351	0.155112	0.210972	0.615217	3
Q07079	Q07079	Insulin-like growth factor-binding protein 5	Igfbp5	1.03319	0.0470995	0.208407	0.618861	3
O08999	O08999	Latent-transforming growth factor beta-binding protein 2	Ltbp2	1.06969	0.0971927	0.196713	0.63575	3
O35988	O35988	Syndecan-4	Sdc4	0.858395	-0.220287	0.190051	0.645578	3
P97798	P97798	Neogenin	Neo1	1.10586	0.145169	0.189411	0.64653	3
P15116	P15116	Cadherin-2	Cdh2	0.94556	-0.0807597	0.189392	0.646558	3
P51655	P51655	Glypican-4;Secreted glypican-4	Gpc4	1.07258	0.10108	0.186527	0.650838	3
Q8BM88	Q8BM88	Cathepsin O	Ctso	1.01622	0.0232164	0.184959	0.653192	3
Q08890	Q08890	Iduronate 2-sulfatase	Ids	1.08255	0.114436	0.182178	0.657388	3
P54763	P54763	Ephrin type-B receptor 2	Ephb2	1.09959	0.136961	0.178068	0.663639	3
Q925I7	Q925I7	Platelet-derived growth factor D;Platelet-derived growth factor D, latent form;Platelet-derived growth factor D, receptor-binding form	Pdgfd	1.07944	0.110283	0.170725	0.674956	3
Q04519	Q04519	Sphingomyelin phosphodiesterase	Smpd1	0.926537	-0.110079	0.170437	0.675403	3
Q60648	Q60648	Ganglioside GM2 activator	Gm2a	1.14968	0.201235	0.162589	0.687719	3
P98063;Q9WVM6	P98063	Bone morphogenetic protein 1	Bmp1	1.06813	0.0950885	0.159697	0.692314	3
P22777	P22777	Plasminogen activator inhibitor 1	Serpine1	1.07624	0.105998	0.159615	0.692444	3
Q811B1	Q811B1	Xylosyltransferase 1	Xylt1	0.874454	-0.193546	0.159543	0.692559	3
P07141	P07141	Macrophage colony-stimulating factor 1;Processed macrophage colony-stimulating factor 1	Csf1	1.08553	0.118395	0.155178	0.699555	3
P47877	P47877	Insulin-like growth factor-binding protein 2	Igfbp2	0.939734	-0.089676	0.14945	0.708843	3
O70362	O70362	Phosphatidylinositol-glycan-specific phospholipase D	Gpld1	0.894635	-0.160628	0.1489	0.709741	3
Q80V53	Q80V53	Carbohydrate sulfotransferase 14	Chst14	0.859111	-0.219083	0.146231	0.714116	3
Q61207	Q61207	Prosaposin	Psap	1.01762	0.0252023	0.135876	0.731348	3
P09055	P09055	Integrin beta-1	Itgb1	0.906832	-0.141093	0.131275	0.739137	3
P09411;P09041	P09411	Phosphoglycerate kinase 1	Pgk1	0.973502	-0.0387444	0.129684	0.74185	3
Q7TQ62	Q7TQ62	Podocan	Podn	0.933193	-0.0997523	0.128183	0.744419	3
P09528	P09528	Ferritin heavy chain;Ferritin heavy chain, N-terminally processed	Fth1	0.925051	-0.112396	0.124674	0.750458	3
P26039	P26039	Talin-1	Tln1	0.973862	-0.0382109	0.121198	0.756488	3
Q9R0E1	Q9R0E1	Procollagen-lysine,2-oxoglutarate 5-dioxygenase 3	Plod3	0.931157	-0.102903	0.118846	0.760595	3
Q62165	Q62165	Dystroglycan;Alpha-dystroglycan;Beta-dystroglycan	Dag1	1.04478	0.0631937	0.118642	0.760953	3
P17751	P17751	Triosephosphate isomerase	Tpi1	0.9251	-0.112319	0.117171	0.763535	3
Q61581	Q61581	Insulin-like growth factor-binding protein 7	Igfbp7	0.944706	-0.0820623	0.116855	0.764091	3
Q6PE55	Q6PE55	Platelet-derived growth factor receptor-like protein	Pdgfrl	0.951713	-0.0714012	0.113833	0.769426	3
O09159	O09159	Lysosomal alpha-mannosidase	Man2b1	1.06284	0.087922	0.10906	0.777929	3
P18242	P18242	Cathepsin D	Ctsd	1.08032	0.111458	0.103642	0.787695	3
Q11136	Q11136	Xaa-Pro dipeptidase	Pepd	1.08945	0.123595	0.100737	0.792981	3
Q6GU68	Q6GU68	Immunoglobulin superfamily containing leucine-rich repeat protein	Islr	0.924641	-0.113035	0.100315	0.793753	3
P32261	P32261	Antithrombin-III	Serpinc1	1.01572	0.0225007	0.0986617	0.79678	3
P47878	P47878	Insulin-like growth factor-binding protein 3	Igfbp3	1.01706	0.0244076	0.0955861	0.802443	3
Q9JME2	Q9JME2	Carbohydrate sulfotransferase 11	Chst11	1.04305	0.0608131	0.0942928	0.804836	3
Q61171	Q61171	Peroxiredoxin-2	Prdx2	1.04594	0.0647968	0.0933213	0.806638	3
Q07235	Q07235	Glia-derived nexin	Serpine2	1.02692	0.0383226	0.0891189	0.814481	3
E9Q557	E9Q557	Desmoplakin	Dsp	1.12019	0.163742	0.0819801	0.82798	3
Q9EP52	Q9EP52	Twisted gastrulation protein homolog 1	Twsg1	0.804734	-0.313416	0.0811046	0.829651	3
Q8R422	Q8R422	CD109 antigen	Cd109	1.01864	0.0266485	0.0807063	0.830412	3
P10852	P10852	4F2 cell-surface antigen heavy chain	Slc3a2	0.979569	-0.0297807	0.0766413	0.838221	3
P06797	P06797	Cathepsin L1;Cathepsin L1 heavy chain;Cathepsin L1 light chain	Ctsl	1.04495	0.063428	0.0687079	0.853674	3
O08992	O08992	Syntenin-1	Sdcbp	1.04138	0.0584933	0.0678214	0.855418	3
Q61147	Q61147	Ceruloplasmin	Cp	1.02394	0.0341282	0.0658572	0.859296	3
Q3UHN9	Q3UHN9	Bifunctional heparan sulfate N-deacetylase/N-sulfotransferase 1;Heparan sulfate N-deacetylase 1;Heparan sulfate N-sulfotransferase 1	Ndst1	0.968368	-0.046372	0.060015	0.870934	3
Q02257;Q02248	Q02257	Junction plakoglobin	Jup	0.935356	-0.0964132	0.059244	0.872481	3
Q8BTM8	Q8BTM8	Filamin-A	Flna	0.975158	-0.0362916	0.0504523	0.890323	3
Q08761	Q08761	Vitamin K-dependent protein S	Pros1	1.02954	0.0420051	0.0491457	0.893006	3
Q80XD1	Q80XD1	Beta-chimaerin	Chn2	0.877369	-0.188744	0.0476838	0.896017	3
P08226	P08226	Apolipoprotein E	Apoe	1.01007	0.0144583	0.0462801	0.898918	3
Q60963	Q60963	Platelet-activating factor acetylhydrolase	Pla2g7	1.03815	0.0540201	0.0434425	0.90481	3
Q61245	Q61245	Collagen alpha-1(XI) chain	Col11a1	0.989371	-0.0154162	0.0410709	0.909765	3
O35490;Q91WS4	O35490	Betaine--homocysteine S-methyltransferase 1	Bhmt	0.988663	-0.0164498	0.0400156	0.911978	3
Q9DBV4	Q9DBV4	Matrix-remodeling-associated protein 8	Mxra8	0.975316	-0.036058	0.0366876	0.918993	3
Q80YX1	Q80YX1	Tenascin	Tnc	1.02241	0.0319687	0.0365581	0.919268	3
P21956	P21956	Lactadherin	Mfge8	1.01533	0.0219519	0.0364223	0.919555	3
Q9WUU7	Q9WUU7	Cathepsin Z	Ctsz	1.02807	0.0399316	0.0346023	0.923417	3
P05213;P68373;P68369;P05214;Q9JJZ2	P05213;P68373;P68369;P05214	Tubulin alpha-1B chain;Tubulin alpha-1C chain;Tubulin alpha-1A chain;Tubulin alpha-3 chain	Tuba1b;Tuba1c;Tuba1a;Tuba3a	1.02024	0.0289036	0.0337193	0.925296	3
P35441	P35441	Thrombospondin-1	Thbs1	1.01491	0.021349	0.0300844	0.933073	3
Q05793	Q05793	Basement membrane-specific heparan sulfate proteoglycan core protein;Endorepellin;LG3 peptide	Hspg2	1.01291	0.0185089	0.0287553	0.935933	3
Q9R1B9;Q80TR4	Q9R1B9	Slit homolog 2 protein;Slit homolog 2 protein N-product;Slit homolog 2 protein C-product	Slit2	0.980427	-0.0285181	0.0286041	0.936259	3
P97326	P97326	Cadherin-6	Cdh6	0.985988	-0.020358	0.0264562	0.940901	3
P54818	P54818	Galactocerebrosidase	Galc	1.00789	0.0113432	0.0244367	0.945286	3
P97447	P97447	Four and a half LIM domains protein 1	Fhl1	1.01114	0.0159805	0.0237359	0.946813	3
P05064	P05064	Fructose-bisphosphate aldolase A	Aldoa	1.00604	0.00868948	0.0215697	0.951547	3
O35188	O35188	Fractalkine;Processed fractalkine	Cx3cl1	0.990675	-0.0135163	0.0179191	0.959579	3
P97290	P97290	Plasma protease C1 inhibitor	Serping1	0.996382	-0.00522944	0.0173761	0.96078	3
P47867	P47867	Secretogranin-3	Scg3	1.00987	0.0141712	0.0152037	0.965598	3
Q9DBJ1	Q9DBJ1	Phosphoglycerate mutase 1	Pgam1	1.014	0.0200583	0.0127994	0.970958	3
Q9Z0G4	Q9Z0G4	WNT1-inducible-signaling pathway protein 2	Wisp2	0.992835	-0.0103748	0.0113757	0.974147	3
P08122	P08122	Collagen alpha-2(IV) chain;Canstatin	Col4a2	1.00266	0.00383797	0.0038762	0.991114	3
P97467	P97467	Peptidyl-glycine alpha-amidating monooxygenase;Peptidylglycine alpha-hydroxylating monooxygenase;Peptidyl-alpha-hydroxyglycine alpha-amidating lyase	Pam	0.999317	-0.000986132	0.00143118	0.99671	3
Q8CG85	Q8CG85	MAM domain-containing protein 2	Mamdc2	0.999084	-0.00132183	0.00141768	0.996741	3
